# Supplementary material for: A selenium-catalysed para-amination of phenols
Source: PubMed Central journal article supplement (PMC6191425; doi:10.1038/s41467-018-06763-4), 2018-10-16
Supplement: 41467_2018_6763_MOESM1_ESM.pdf [file 41467_2018_6763_MOESM1_ESM.pdf]

# **A selenium-catalysed *para*-amination of phenols**

*Yan et al.*

## General considerations

Commercially available chemicals were obtained from Adamas, Energy, TCI and Bide and used as received unless otherwise stated. *N*-phenylselanylphthalimide (**C1**) was synthesized according to a previous reported literature<sup>1</sup>.

Reactions were monitored with analytical thin-layer chromatography (TLC) on silica. <sup>1</sup>H NMR and <sup>13</sup>C NMR data were recorded on Bruker nuclear resonance (300 MHz, 400 MHz and 500MHz) spectrometers unless otherwise specified, respectively. Chemical shifts ( $\delta$ ) are given in ppm relative to TMS. The residual solvent signals were used as references and the chemical shifts converted to the TMS scale (CDCl<sub>3</sub>:  $\delta_{\text{H}}$ =7.26 ppm,  $\delta_{\text{C}}$ =77.16 ppm; CD<sub>2</sub>Cl<sub>2</sub>:  $\delta_{\text{H}}$ =5.32 ppm,  $\delta_{\text{C}}$ =54.00 ppm; DMSO-*d*<sub>6</sub>:  $\delta_{\text{H}}$ =2.50 ppm,  $\delta_{\text{C}}$ =39.52 ppm; MeOD-*d*<sub>4</sub>:  $\delta_{\text{H}}$ =3.31 ppm,  $\delta_{\text{C}}$ =49.00 ppm; Acetone-*d*<sub>6</sub>:  $\delta_{\text{H}}$ =2.05 ppm,  $\delta_{\text{C}}$ =29.84 ppm, 206.26 ppm). HRMS (ESI) analysis was performed by The Analytical Instrumentation Center at Peking University, Shenzhen Graduate School and (HRMS) data were reported with ion mass/charge (*m/z*) ratios as values in atomic mass units. Fluorescence spectra were measured on a Shimadzu RF-5301PC spectrometer with a slit width of 3 nm for excitation and 3 nm for emission.

### Method A to prepare 1:

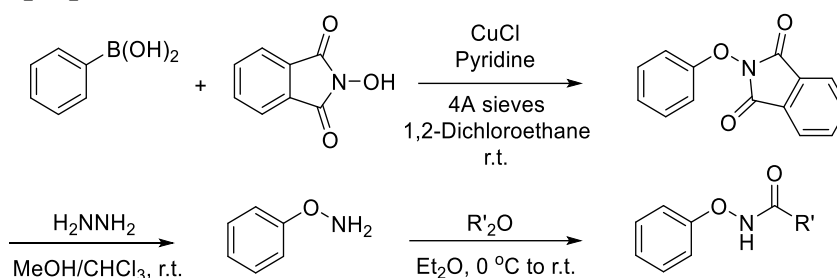

Following a literature report<sup>2</sup>, in a 50mL round-bottom flask, *N*-hydroxyphthalimide (1.63 g, 10 mmol), copper (I) chloride (0.99 g, 10 mmol), freshly activated 4 Å molecular sieves (2.5 g), and phenylboronic acid (2.44 g, 20 mmol) were combined in 1,2-dichloroethane (0.2 M). The pyridine (0.8 mL, 11 mmol) was then added to the suspension. The reaction mixture was open to the atmosphere and stirred at room temperature over 24-48 h. Upon completion, silica gel was added to the flask and the solvent was removed under vacuum. The desired *N*-aryloxyphthalimide were obtained by flash column chromatography on silica gel.

Hydrazine monohydrate (1.5 mL, 30 mmol) was added to the solution of *N*-aryloxyphthalimide (1.68 g, 7 mmol) in 10% MeOH in CHCl<sub>3</sub> (0.1 M). The reaction was allowed to stir at room temperature over 12 h. Upon completion, the reaction mixture was filtered off and washed with CH<sub>2</sub>Cl<sub>2</sub>. The filtrate was concentrated under reduced pressure, and purified by flash silica gel column chromatography to give the corresponding *N*-aryloxyamine.

In a 20 mL round-bottom flask, *N*-aryloxyamine (0.6 g, 6 mmol) was dissolved in ether (0.2 M). The flask was cooled in an ice bath, to which corresponding anhydride (1.3 mL, 12 mmol) was slowly added. The ice bath was allowed to warm to room

temperature and the mixture was stirred for 3 h at room temperature. The reaction mixture was concentrated under reduced pressure and purified by flash silica gel column chromatography to give *N*-phenoxyacetamide (0.85 g, 56%).

**1w** was synthesized according to a literature reported<sup>3</sup>.

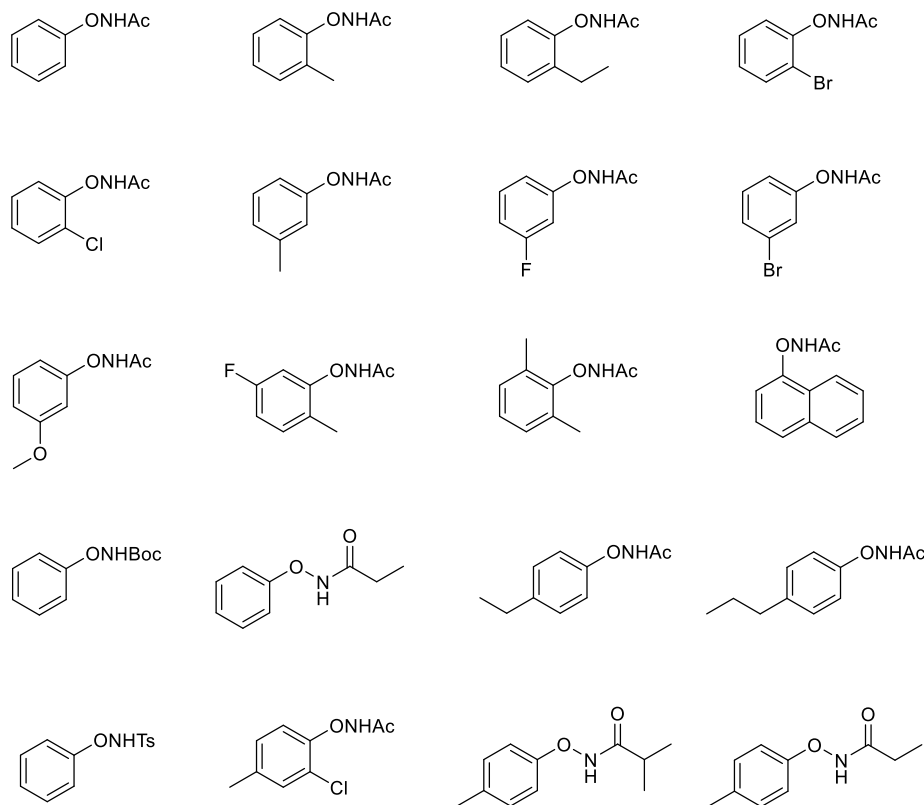

Above starting materials were synthesized according to Method A.

### Method B to prepare 1:

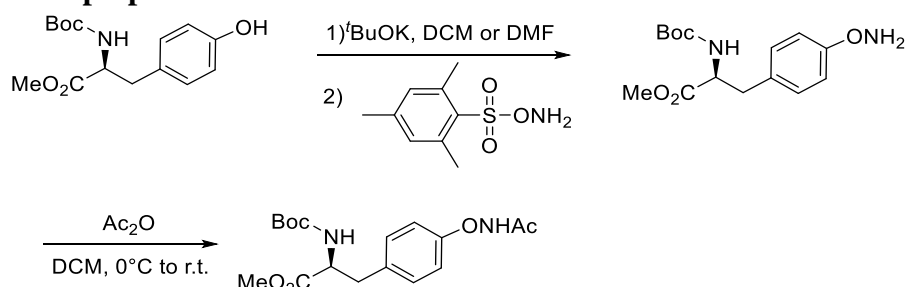

Following literature reports<sup>4</sup>, L-tyrosine (2.95 g, 10 mmol) was dissolved in 10 mL of methanol, and then potassium *tert*-butoxide (1.12 g, 10 mmol) was added. The mixture was allowed to stir for 0.5 h under N<sub>2</sub> atmosphere. The methanol was removed, and the residue was taken up in 2 mL of DCM. Then the freshly prepared *O*-mesitylsulfonylhydroxyl-amine (2.15 g, 10 mmol) was added under ice cooling. The mixture was allowed to stir for 1 h, dichloromethane was then removed under reduce pressure to afford the corresponding *N*-aryloxyamine.

In a 20 mL round-bottom flask, *N*-aryloxyamine (1.5 g, 5 mmol) was dissolved in

ether (0.2 M). The flask was cooled in an ice bath, to which acetic anhydride (1.1 mL, 10 mmol) was slowly added. The ice bath was allowed to warm to room temperature and the mixture was stirred for 3 h at room temperature. The reaction mixture was concentrated under reduced pressure and purified by flash silica gel column chromatography to give the corresponding *N*-phenoxyacetamide (1.4 g, 40% overall yield).

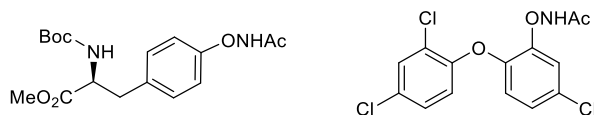

Above starting materials were synthesized according to Method B.

### Method C to prepare 1:

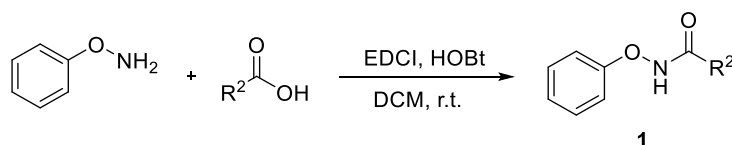

To a solution of *N*-aryloxyamine (3.0 mmol) and corresponding acid (3.0 mmol) in CH2Cl2 (12.0 ml) at 0°C were added HOBT (3.3 mmol) and EDCI (3.3 mmol). The reaction mixture was stirred at room temperature for 10 h, then washed with 5% aqueous HCl (3×15 ml), 5% aqueous NaHCO3 (20.0 ml), H2O (20.0 ml), and brine (20.0 ml), and dried (Na2SO4). Purification by flash chromatography afforded the corresponding *N*-phenoxyamides.

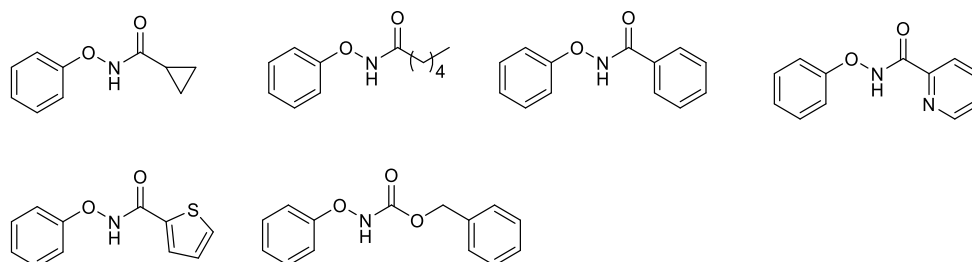

Above starting materials were synthesized according to Method C.

### Method to prepare substrate *d*<sub>8</sub>-1a:

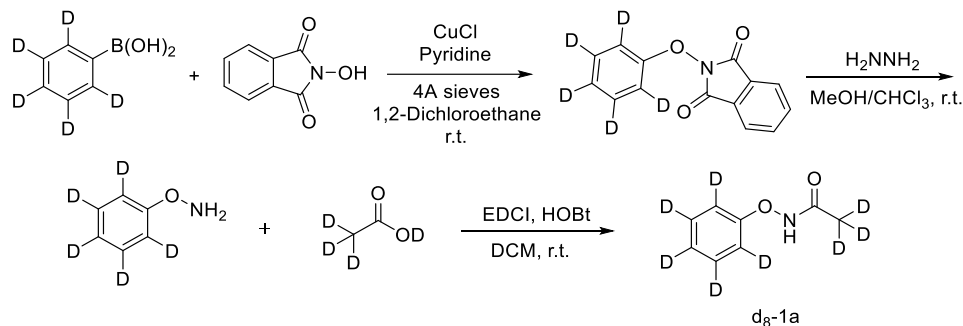

*d*<sub>8</sub>-1a was synthesized using the method combined Method A and Method C.

### Method to prepare substrates 4:

Following a literature report<sup>5</sup>, sulfonyl chloride (1.35g, 10 mmol; ca. 5 M in CH2Cl2)



was added dropwise via a dropping funnel to a solution of thiophenol (1.1g, 10 mmol; ca. 1 M in CH<sub>2</sub>Cl<sub>2</sub>) and Et<sub>3</sub>N (0.14 mL, 1 mmol) at 0 °C. After stirring for 15 min, the mixture was warmed to r.t. for 30 min and then cooled to 0 °C. The resulting solution was transferred dropwise via cannula to a solution of phthalimide (1.36g, 10 mmol; ca. 1 M in CH<sub>2</sub>Cl<sub>2</sub>) and Et<sub>3</sub>N (1.5 mL, 11 mmol) at 0 °C and the mixture was then warmed to r.t. over 1 h. The solution was diluted with H<sub>2</sub>O, extracted with CH<sub>2</sub>Cl<sub>2</sub> (3×) before being dried over Na<sub>2</sub>SO<sub>4</sub>, and then concentrated to give crude product that was purified using recrystallization. For samples with appreciable amounts of phthalimide present, the crude was dissolved with CH<sub>2</sub>Cl<sub>2</sub>, diluted with 1.0 M NaOH, extracted with CH<sub>2</sub>Cl<sub>2</sub> (3×) before being dried over Na<sub>2</sub>SO<sub>4</sub>, then concentrated before being purified by recrystallization.

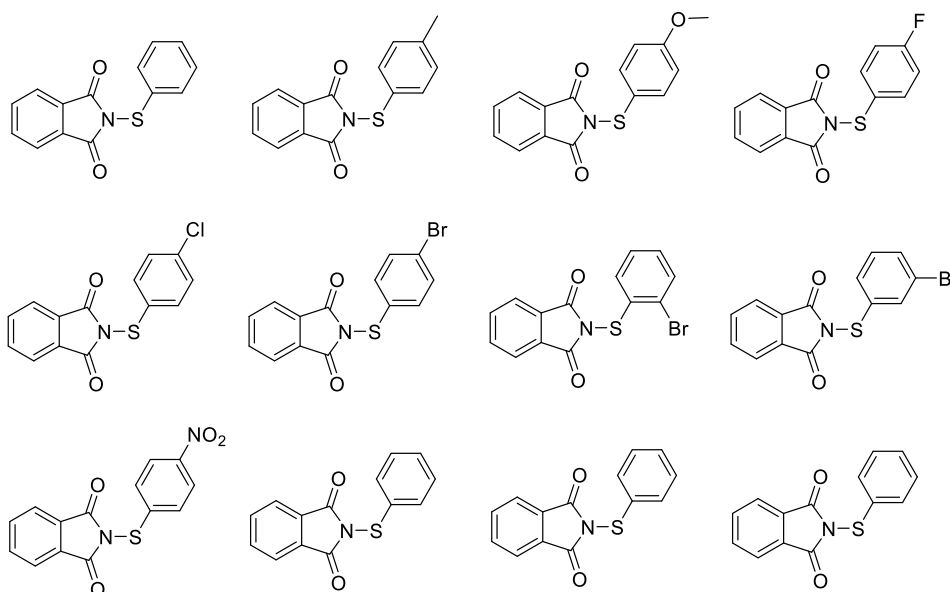

## Theoretical studies

All electronic structure calculations were performed with the Gaussian 09 package<sup>6</sup>. All of the geometries were optimized by the B3LYP functional<sup>7</sup> augmented with Grimmes D3 dispersion correction (B3LYP-D3)<sup>8</sup>. Two kinds of basis sets were used. The smaller basis set (BS1) was used for geometry optimizations and vibrational frequency calculations. In BS1, the effective core potential LANL2DZdp<sup>9</sup> was used for Br and Se, and the 6-31G (d, p) basis set was used for all the other atoms. Single-point energies of various stationary points in the solvent were calculated by employing a larger basis set aug-cc-PVTZ-pp<sup>10</sup> for Br and Se atoms and 6-311++G(2d,2p) basis set for all other atoms. Geometry optimizations for the type I and type II reaction are conducted without any constraint in 2,2,2-trifluoroethanol (TFE) and 1,4-dioxane, respectively, using the polarizable continuum model (PCM)<sup>11</sup>. Harmonic vibrational frequency calculations show that the stationary points located were either minima or transition state (single imaginary frequency).

All free energy profiles are reported at 298.15 K and 1.00 bar. Activation free energy

barriers here are defined as the free energy difference between the transition state and the lowest-energy stationary point before it in the reaction pathways.

## Characterization data for the new compounds

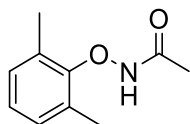

***N*-(2,6-dimethylphenoxy)acetamide, 1b, white solid, 0.84 g, 4.7 mmol, yield: 47%**  
**<sup>1</sup>H NMR (400 MHz, DMSO):**  $\delta$  11.33 (s, 1H), 7.05–6.92 (m, 3H), 2.30 (s, 6H), 1.79 (s, 3H). **<sup>13</sup>C NMR (101 MHz, DMSO):**  $\delta$  166.98, 155.52, 130.79, 129.29, 125.45, 19.92, 16.96. HRMS (ESI) calculated for C<sub>10</sub>H<sub>13</sub>NO<sub>2</sub>Na [M+Na]<sup>+</sup>: 202.0838; Found: 202.0844.

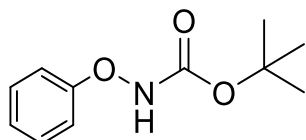

***tert*-butyl phenoxycarbamate, 1c, brown solid, 1.36 g, 6.5 mmol, yield: 65%**  
**<sup>1</sup>H NMR (400 MHz, CDCl<sub>3</sub>):**  $\delta$  7.58 (s, 1H), 7.32 (t, *J* = 8.0 Hz, 2H), 7.15–7.09 (m, 2H), 7.04 (t, *J* = 7.3 Hz, 1H), 1.52 (s, 9H). **<sup>13</sup>C NMR (101 MHz, CDCl<sub>3</sub>):**  $\delta$  159.98, 156.52, 129.35, 122.64, 113.28, 82.75, 28.14. HRMS (ESI) calculated for C<sub>11</sub>H<sub>15</sub>NO<sub>3</sub>Na [M+Na]<sup>+</sup>: 232.0944; Found: 232.0946.

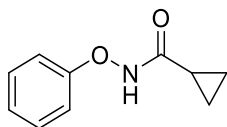

***N*-phenoxycyclopropanecarboxamide, 1d, white solid, 1.3 g, 7.4 mmol, yield: 74%**  
**<sup>1</sup>H NMR (500 MHz, DMSO):**  $\delta$  11.86 (s, 1H), 7.32 (m, 2H), 7.00 (m, 3H), 1.59 (s, 1H), 0.85–0.72 (m, 4H). **<sup>13</sup>C NMR (126 MHz, DMSO):**  $\delta$  171.73, 160.13, 129.89, 122.67, 113.30, 11.50, 6.91. HRMS (ESI) calculated for C<sub>10</sub>H<sub>11</sub>NO<sub>2</sub>Na [M+Na]<sup>+</sup>: 200.0682; Found: 200.0685.

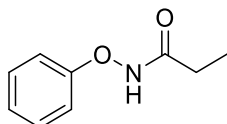

***N*-phenoxypropionamide, 1e, white solid, 0.74 g, 4.5 mmol, yield: 45%**  
**<sup>1</sup>H NMR (400 MHz, DMSO):**  $\delta$  11.67 (s, 1H), 7.32 (m, 2H), 7.00 (d, *J* = 7.3 Hz, 3H), 2.19 (q, *J* = 4.0 Hz, 2H), 1.09 (t, *J* = 7.1 Hz, 3H). **<sup>13</sup>C NMR (126 MHz, DMSO):**  $\delta$  171.42, 160.04, 129.84, 122.62, 113.25, 25.86, 9.90. HRMS (ESI) calculated for C<sub>9</sub>H<sub>11</sub>NO<sub>2</sub>Na [M+Na]<sup>+</sup>: 188.0682; Found: 188.0685.

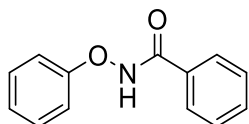

***N*-phenoxybenzamide, 1f, white solid, 1.02 g, 4.8 mmol, yield: 48%**

**<sup>1</sup>H NMR (300 MHz, DMSO-*d*<sub>6</sub>):** δ 12.49 (s, 1H), 7.94–7.81 (m, 2H), 7.62 (m, 1H), 7.53 (t, *J* = 7.3 Hz, 2H), 7.41–7.28 (m, 2H), 7.06 (dd, *J* = 16.8, 7.9 Hz, 3H). **<sup>13</sup>C NMR (75 MHz, DMSO-*d*<sub>6</sub>):** δ 160.07, 132.57, 131.94, 130.00, 129.13, 127.76, 122.83, 113.45. **HRMS (ESI)** calculated for C<sub>13</sub>H<sub>12</sub>NO<sub>2</sub> [M+H]<sup>+</sup>: 214.0863; Found: 214.0863.

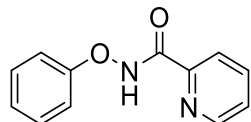

***N*-phenoxycolinamide, 1g, white solid, 1.2 g, 5.7 mmol, yield: 57%**

**<sup>1</sup>H NMR (400 MHz, CDCl<sub>3</sub>):** δ 10.94 (s, 1H), 8.6–8.51 (m, 1H), 8.20 (d, *J* = 7.8 Hz, 1H), 7.88 (m, 1H), 7.49 (m, 1H), 7.37–7.24 (m, 2H), 7.16 (d, *J* = 8.0 Hz, 2H), 7.05 (dd, *J* = 10.5, 4.1 Hz, 1H). **<sup>13</sup>C NMR (101 MHz, CDCl<sub>3</sub>):** δ 162.85, 159.57, 148.50, 137.69, 129.50, 127.18, 123.11, 122.84, 113.43. **HRMS (ESI)** calculated for C<sub>12</sub>H<sub>11</sub>N<sub>2</sub>O<sub>2</sub> [M+H]<sup>+</sup>: 215.0755; Found: 215.0760.

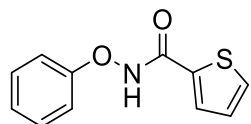

***N*-phenoxythiophene-2-carboxamide, 1h, white solid, 1.16 g, 5.3 mmol, yield: 53%**

**<sup>1</sup>H NMR (500 MHz, DMSO):** δ 12.59 (s, 1H), 7.86 (dd, *J* = 6.5, 4.6 Hz, 2H), 7.34 (t, *J* = 7.8 Hz, 2H), 7.21 (t, *J* = 4.2 Hz, 1H), 7.09 (d, *J* = 8.0 Hz, 2H), 7.03 (t, *J* = 7.2 Hz, 1H). **<sup>13</sup>C NMR (126 MHz, DMSO):** δ 160.69, 160.03, 135.61, 132.35, 129.99, 128.60, 122.98, 113.45. **HRMS (ESI)** calculated for C<sub>11</sub>H<sub>9</sub>NO<sub>2</sub>SNa [M+Na]<sup>+</sup>: 242.0246; Found: 242.0251.

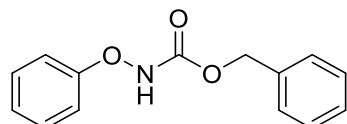

***N*-phenoxy-2-phenylacetamide, 1i, white solid, 1.26 g, 5.2 mmol, yield: 52%**

**<sup>1</sup>H NMR (400 MHz, CDCl<sub>3</sub>):** δ 7.78 (s, 1H), 7.38 (s, 4H), 7.33 (dd, *J* = 8.5, 7.5 Hz, 2H), 7.12 (d, *J* = 8.0 Hz, 2H), 7.07 (m, 1H), 5.26 (s, 2H). **<sup>13</sup>C NMR (101 MHz, CDCl<sub>3</sub>):** δ 159.75, 157.36, 135.24, 129.44, 128.65, 128.58, 128.34, 122.95, 113.31, 68.11. **HRMS (ESI)** calculated for C<sub>14</sub>H<sub>13</sub>NO<sub>3</sub>Na [M+Na]<sup>+</sup>: 266.0788; Found: 266.0789.

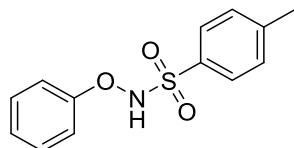

**4-methyl-*N*-phenoxybenzenesulfonamide, 1j, white solid, 1.03 g, 3.9 mmol, yield: 39%**

**<sup>1</sup>H NMR (400 MHz, CDCl<sub>3</sub>):** δ 7.88 (d, *J* = 8.2 Hz, 2H), 7.75 (s, 1H), 7.35 (d, *J* = 8.1 Hz, 2H), 7.29 (t, *J* = 7.9 Hz, 2H), 7.15 (d, *J* = 8.3 Hz, 2H), 7.05 (s, 1H), 2.46 (s, 3H). **<sup>13</sup>C NMR (101 MHz, CDCl<sub>3</sub>):** δ 159.36, 145.39, 133.11, 129.90, 129.36, 128.80, 123.27, 114.32, 21.74. **HRMS (ESI)** calculated for C<sub>13</sub>H<sub>13</sub>NO<sub>3</sub>Na [M+Na]<sup>+</sup>: 286.0508;

Found: 286.0510.

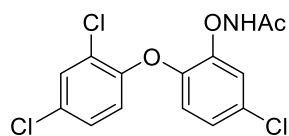

***N*-(5-chloro-2-(2,4-dichlorophenoxy)phenoxy)acetamide, 1k, white solid, 1.79 g, 5.2 mmol, yield: 52%**

**<sup>1</sup>H NMR (500 MHz, DMSO):**  $\delta$  11.81 (s, 1H), 7.71 (d,  $J$  = 2.5 Hz, 1H), 7.35 (dd,  $J$  = 8.9, 2.6 Hz, 1H), 7.25 (s, 1H), 7.10 (s, 2H), 6.88 (d,  $J$  = 8.8 Hz, 1H), 1.91 (s, 3H). **<sup>13</sup>C NMR (126 MHz, DMSO):**  $\delta$  151.90, 151.69, 130.29, 129.98, 128.94, 127.87, 124.02, 123.26, 122.81, 119.40, 114.76, 40.52, 40.35, 40.18, 39.52, 19.77. **HRMS (ESI)** calculated for C<sub>14</sub>H<sub>10</sub>Cl<sub>3</sub>NO<sub>3</sub>Na [M+Na]<sup>+</sup> 367.9618; Found: 367.9614.

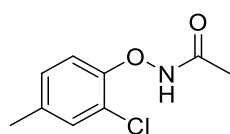

***N*-(2-chloro-4-methylphenoxy)acetamide, 1l, white solid, 0.86 g, 4.3 mmol, yield: 43%**

**<sup>1</sup>H NMR (500 MHz, DMSO):**  $\delta$  11.79 (s, 1H), 7.24 (s, 1H), 7.06 (m, 2H), 2.23 (s, 3H), 1.93 (s, 3H). **<sup>13</sup>C NMR (126 MHz, DMSO):**  $\delta$  167.96, 152.99, 133.12, 130.60, 128.93, 118.57, 114.10, 20.14, 19.78. **HRMS (ESI)** calculated for C<sub>9</sub>H<sub>10</sub>ClNO<sub>2</sub>Na [M+Na]<sup>+</sup>: 222.0292; Found: 222.0301.

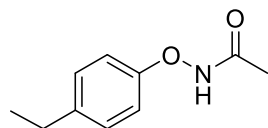

***N*-(4-ethylphenoxy)acetamide, 1m, white solid, 0.81 g, 4.5 mmol, yield: 45%**

**<sup>1</sup>H NMR (300 MHz, DMSO):**  $\delta$  11.62 (s, 1H), 7.12 (d,  $J$  = 8.3 Hz, 2H), 6.90 (d,  $J$  = 8.3 Hz, 2H), 2.53 (q,  $J$  = 7.6 Hz, 2H), 1.89 (s, 3H), 1.13 (t,  $J$  = 7.6 Hz, 3H). **<sup>13</sup>C NMR (300 MHz, DMSO):**  $\delta$  167.54, 158.13, 138.04, 128.99, 113.26, 27.78, 19.87, 16.37. **HRMS (ESI)** calculated for C<sub>10</sub>H<sub>13</sub>NO<sub>2</sub>Na [M+Na]<sup>+</sup>: 202.0838; Found: 202.0844.

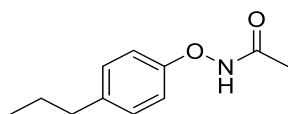

***N*-phenoxypropionamide, 1n, white solid, 0.98 g, 5.1 mmol, yield: 51%**

**<sup>1</sup>H NMR (300 MHz, DMSO):**  $\delta$  11.61 (s, 1H), 7.10 (d,  $J$  = 8.0 Hz, 2H), 6.90 (d,  $J$  = 7.9 Hz, 2H), 2.48 (t,  $J$  = 7.4 Hz, 2H), 1.89 (s, 3H), 1.54 (q,  $J$  = 7.4 Hz, 2H), 0.86 (t,  $J$  = 7.3 Hz, 3H). **<sup>13</sup>C NMR (101 MHz, DMSO):**  $\delta$  167.54, 158.16, 136.36, 129.55, 118.19, 36.83, 24.78, 19.86, 14.00. **HRMS (ESI)** calculated for C<sub>11</sub>H<sub>15</sub>NO<sub>2</sub>Na [M+Na]<sup>+</sup>: 216.0995; Found: 216.1008.

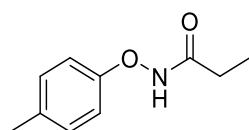

***N*-(*p*-tolylloxy)propionamide, 1o, white solid, 0.72 g, 4 mmol, yield: 40%**

**<sup>1</sup>H NMR (300 MHz, DMSO):** δ 11.61 (s, 1H), 7.10 (d, *J* = 8.0 Hz, 2H), 6.90 (d, *J* = 7.9 Hz, 2H), 2.48 (t, *J* = 7.4 Hz, 2H), 1.89 (s, 3H), 1.54 (q, *J* = 5.6 Hz, 2H), 0.86 (t, *J* = 7.3 Hz, 3H). **<sup>13</sup>C NMR (75 MHz, DMSO):** δ 167.54, 158.16, 136.36, 129.55, 113.19, 36.83, 24.78, 19.86, 14.00. **HRMS (ESI)** calculated for C<sub>10</sub>H<sub>13</sub>NO<sub>2</sub>Na [M+Na]<sup>+</sup>: 202.0838; Found: 202.0837.

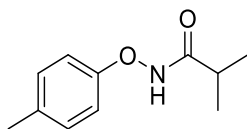

***N*-(*p*-tolylloxy)isobutyramide, 1p, white solid, 1.12 g, 5.8 mmol, yield: 58%**

**<sup>1</sup>H NMR (300 MHz, DMSO):** δ 11.67 (s, 1H), 7.10 (d, *J* = 8.4 Hz, 2H), 6.86 (d, *J* = 8.4 Hz, 2H), 2.42 (m, 1H), 2.23 (s, 3H), 1.08 (d, *J* = 6.8 Hz, 6H). **<sup>13</sup>C NMR (75 MHz, DMSO):** δ 174.28, 158.10, 131.46, 130.17, 113.16, 31.79, 20.54, 19.69. **HRMS (ESI)** calculated for C<sub>11</sub>H<sub>15</sub>NO<sub>2</sub>Na [M+Na]<sup>+</sup>: 216.0995; Found: 216.0978.

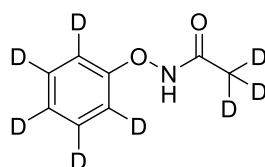

*d*<sub>8</sub>-1a

***d*<sub>8</sub>-*N*-phenoxyacetamide, *d*<sub>8</sub>-1a, white solid, 99 mg, 0.62 mmol, yield: 62%**

**<sup>1</sup>H NMR (400 MHz, DMSO) δ** 11.67 (s, 1H). **<sup>13</sup>C NMR (101 MHz, DMSO) δ** 167.67, 159.92, 129.62, 129.38, 129.14, 122.17, 121.94, 113.18, 112.93, 112.69. **HRMS (ESI)** calculated for C<sub>8</sub>HD<sub>8</sub>NO<sub>2</sub>Na [M+Na]<sup>+</sup>: 182.1028; Found: 182.1032.

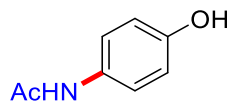

2a

***N*-(4-hydroxyphenyl)acetamide, 2a, white solid, 27.2 mg, 0.18 mmol, yield: 90%**

**<sup>1</sup>H NMR (500 MHz, DMSO):** δ 9.63 (s, 1H), 9.11 (s, 1H), 7.33 (d, *J* = 8.9 Hz, 2H), 6.67 (d, *J* = 8.9 Hz, 2H), 1.97 (s, 3H); **<sup>13</sup>C NMR (126 MHz, DMSO):** δ 167.92, 153.54, 131.45, 121.25, 115.41, 24.15. **HRMS (ESI)** calculated for C<sub>8</sub>H<sub>9</sub>NO<sub>2</sub>Na [M+Na]<sup>+</sup>: 174.0525; Found: 174.0528.

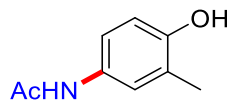

2b

***N*-(4-hydroxy-3-methylphenyl)acetamide, 2b, white solid, 24.1 mg, 0.146 mmol, yield: 73%**

**<sup>1</sup>H NMR (500 MHz, DMSO):** δ 9.59 (s, 1H), 9.02 (s, 1H), 7.23 (d, *J* = 2.3 Hz, 1H), 7.15 (dd, *J* = 8.5, 2.5 Hz, 1H), 6.67 (d, *J* = 8.6 Hz, 1H), 2.07 (s, 3H), 1.96 (s, 3H); **<sup>13</sup>C NMR (126 MHz, DMSO):** δ 167.87, 151.63, 131.29, 124.00, 122.57, 118.51, 114.79,

24.15, 16.54. **HRMS (ESI)** calculated for  $C_9H_{11}NO_2Na$   $[M+Na]^+$  : 188.0682; Found: 188.0684.

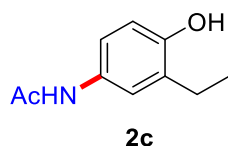

***N*-(3-ethyl-4-hydroxyphenyl)acetamide, 2c, white solid, 29.7 mg, 0.166 mmol, yield: 83%**

**$^1H$  NMR (500 MHz, DMSO):**  $\delta$  9.59 (s, 1H), 8.99 (s, 1H), 7.23 (d,  $J = 2.4$  Hz, 1H), 7.19 (dd,  $J = 8.5, 2.5$  Hz, 1H), 6.67 (d,  $J = 8.5$  Hz, 1H), 2.48 (q,  $J = 7.5$  Hz, 2H), 1.97 (s, 3H), 1.10 (t,  $J = 7.5$  Hz, 3H);  **$^{13}C$  NMR (126 MHz, DMSO):**  $\delta$  151.19, 131.46, 130.12, 120.92, 118.47, 114.96, 24.15, 23.23, 14.55. **HRMS (ESI)** calculated for  $C_{10}H_{13}NO_2Na$   $[M+Na]^+$  : 202.0838; Found: 202.0804.

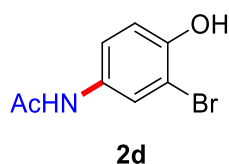

***N*-(3-bromo-4-hydroxyphenyl)acetamide, 2d, white solid, 35.7 mg, 0.156 mmol, yield: 78%**

**$^1H$  NMR (400 MHz, DMSO):**  $\delta$  9.98 (s, 1H), 9.87 (s, 1H), 7.83 (d,  $J = 2.3$  Hz, 1H), 7.27 (dd,  $J = 8.7, 2.4$  Hz, 1H), 6.89 (d,  $J = 8.7$  Hz, 1H), 1.99 (s, 3H);  **$^{13}C$  NMR (101 MHz, DMSO):**  $\delta$  168.33, 150.26, 132.56, 123.92, 120.19, 116.54, 109.00, 24.22. **HRMS (ESI)** calculated for  $C_8H_8BrNO_2Na$   $[M+Na]^+$  : 251.9631; Found: 251.9627.

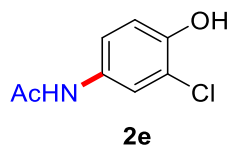

***N*-(3-chloro-4-hydroxyphenyl)acetamide, 2e, white solid, 24.1 mg, 0.13 mmol, yield: 65%**

**$^1H$  NMR (500 MHz, DMSO):**  $\delta$  9.85 (s, 1H), 9.32 (s, 1H), 7.28 (d,  $J = 8.7$  Hz, 1H), 6.84 (s, 1H), 6.70 (d,  $J = 8.5$  Hz, 1H), 2.00 (s, 3H);  **$^{13}C$  NMR (126 MHz, DMSO):**  $\delta$  169.08, 156.04, 129.00, 128.90, 126.80, 115.97, 114.77, 23.32. **HRMS (ESI)** calculated for  $C_8H_8ClNO_2Na$   $[M+Na]^+$  : 208.0136; Found: 208.0139.

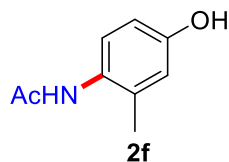

***N*-(4-hydroxy-2-methylphenyl)acetamide, 2f, white solid, 27.1 mg, 0.164 mmol, yield: 82%**

**$^1H$  NMR (500 MHz, DMSO):**  $\delta$  9.20 (s, 1H), 9.10 (s, 1H), 7.02 (d,  $J = 8.5$  Hz, 1H), 6.59 (d,  $J = 2.6$  Hz, 1H), 6.53 (dd,  $J = 8.5, 2.7$  Hz, 1H), 2.07 (s, 3H), 1.98 (s, 3H);  **$^{13}C$  NMR (126 MHz, DMSO):**  $\delta$  168.58, 155.30, 134.34, 128.32, 127.44, 116.94, 112.94,

23.39, 18.36. **HRMS (ESI)** calculated for  $C_9H_{11}NO_2Na$   $[M+Na]^+$ : 188.0682; Found: 188.0688.

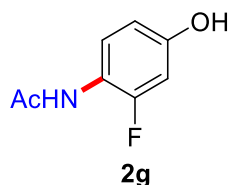

*N*-(2-fluoro-4-hydroxyphenyl)acetamide, **2g**, white solid, **28.1 mg**, **0.166 mmol**, **yield: 83%**

**$^1H$  NMR (500 MHz, DMSO):**  $\delta$  9.73 (s, 1H), 9.39 (s, 1H), 7.38 (t,  $J = 9.0$  Hz, 1H), 6.59 (dd,  $J = 12.3, 2.6$  Hz, 1H), 6.54 (dd,  $J = 8.7, 2.3$  Hz, 1H), 2.00 (s, 3H);  **$^{13}C$  NMR (126 MHz, DMSO):**  $\delta$  168.74, 155.91 (d,  $J = 11.0$  Hz), 155.79 (dd,  $J = 127.7, 116.7$  Hz), 126.97 (d,  $J = 3.4$  Hz), 117.50, 111.23, 103.09 (d,  $J = 22.3$  Hz), 23.45;  **$^{19}F$  NMR (376 MHz, DMSO):**  $\delta$  -121.94. **HRMS (ESI)** calculated for  $C_8H_8FNO_2Na$   $[M+Na]^+$ : 192.0431; Found: 192.0434.

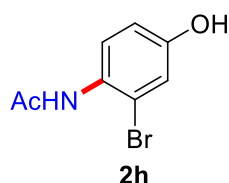

*N*-(2-bromo-4-hydroxyphenyl)acetamide, **2h**, white solid, **30.7 mg**, **0.134 mmol**, **yield: 67%**

**$^1H$  NMR (500 MHz, DMSO):**  $\delta$  9.82 (s, 1H), 9.29 (s, 1H), 7.21 (d,  $J = 8.7$  Hz, 1H), 7.01 (d,  $J = 2.6$  Hz, 1H), 6.74 (dd,  $J = 8.7, 2.7$  Hz, 1H), 1.99 (s, 3H);  **$^{13}C$  NMR (126 MHz, DMSO)**  $\delta$  168.87, 156.37, 129.44, 128.22, 120.13, 118.98, 115.31, 23.33. **HRMS (ESI)** calculated for  $C_8H_8BrNO_2Na$   $[M+Na]^+$ : 251.9631; Found: 251.9632.

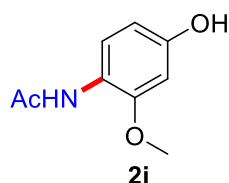

*N*-(4-hydroxy-2-methoxyphenyl)acetamide, **2i**, white solid, **26.8 mg**, **0.148 mmol**, **yield: 74%**

**$^1H$  NMR (500 MHz, DMSO):**  $\delta$  9.31 (s, 1H), 8.87 (s, 1H), 7.44 (d,  $J = 8.6$  Hz, 1H), 6.42 (d,  $J = 2.5$  Hz, 1H), 6.28 (dd,  $J = 8.6, 2.5$  Hz, 1H), 3.73 (s, 3H), 1.98 (s, 3H);  **$^{13}C$  NMR (126 MHz, DMSO):**  $\delta$  168.36, 155.38, 152.12, 124.83, 119.51, 106.55, 99.76, 55.81, 23.88. **HRMS (ESI)** calculated for  $C_9H_{11}NO_3Na$   $[M+Na]^+$ : 204.0631; Found: 204.0638.

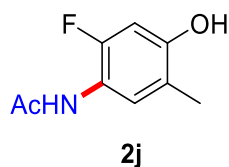

*N*-(2-fluoro-4-hydroxy-5-methylphenyl)acetamide, **2j**, white solid, **22.7 mg**, **0.124**

mmol, yield: 62%

**<sup>1</sup>H NMR (500 MHz, DMSO):** δ 9.68 (s, 1H), 9.36 (s, 1H), 7.25 (d, *J* = 9.1 Hz, 1H), 6.59 (d, *J* = 12.0 Hz, 1H), 2.04 (s, 3H), 1.99 (s, 3H); **<sup>13</sup>C NMR (126 MHz, DMSO):** δ 168.88, 154.68, 153.44 (d, *J* = 10.1 Hz), 152.75, 127.92 (d, *J* = 2.8 Hz), 119.89 (d, *J* = 2.9 Hz), 116.83 (d, *J* = 13.8 Hz), 102.43, 102.25, 23.39, 15.71. **<sup>19</sup>F NMR (376 MHz, DMSO)** δ -125.85. **HRMS (ESI)** calculated for C<sub>9</sub>H<sub>10</sub>FNO<sub>2</sub>Na [M+Na]<sup>+</sup>: 206.0588; Found: 206.0583.

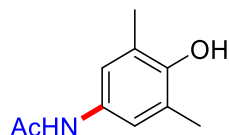

2k

***N*-(4-hydroxy-3,5-dimethylphenyl)acetamide, 2k, white solid, 32.9 mg, 0.184 mmol, yield: 92%**

**<sup>1</sup>H NMR (400 MHz, DMSO):** δ 9.55 (s, 1H), 7.95 (s, 1H), 7.10 (s, 2H), 2.11 (s, 6H), 1.96 (s, 3H); **<sup>13</sup>C NMR (101 MHz, DMSO):** δ 167.92, 149.36, 131.53, 124.74, 119.99, 24.25, 17.26. **HRMS (ESI)** calculated for C<sub>10</sub>H<sub>13</sub>NO<sub>2</sub>Na [M+Na]<sup>+</sup>: 202.0838; Found: 202.0847.

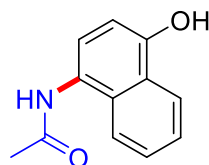

2l

***N*-(4-hydroxy-3,5-dimethylphenyl)acetamide, 2l, white solid, 21.7 mg, 0.108 mmol, yield: 54%**

**<sup>1</sup>H NMR (400 MHz, DMSO):** δ 10.16 (s, 1H), 9.67 (s, 1H), 8.23–8.15 (m, 1H), 7.91 (d, *J* = 7.9 Hz, 1H), 7.50 (m, 2H), 7.34 (d, *J* = 8.0 Hz, 1H), 6.87 (d, *J* = 8.0 Hz, 1H), 2.15 (s, 3H); **<sup>13</sup>C NMR (101 MHz, DMSO):** δ 169.52, 151.72, 130.32, 126.48, 125.42, 125.20, 125.05, 124.19, 123.31, 122.76, 107.76, 23.61. **HRMS (ESI)** calculated for C<sub>12</sub>H<sub>11</sub>NNaO<sub>2</sub> [M+Na]<sup>+</sup>: 224.0682; Found: 224.0690.

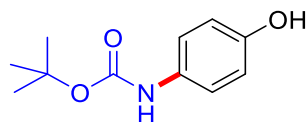

2m

***tert*-butyl (4-hydroxyphenyl)carbamate, 2m, white solid, 31.8 mg, 0.152 mmol, yield: 76%**

**<sup>1</sup>H NMR (500 MHz, DMSO):** δ 9.09 (s, 1H), 8.92 (s, 1H), 7.19 (d, *J* = 7.2 Hz, 2H), 6.64 (d, *J* = 8.7 Hz, 2H), 1.43 (s, 9H); **<sup>13</sup>C NMR (126 MHz, DMSO):** δ 153.49, 152.95, 131.40, 120.58, 115.46, 78.89, 28.59. **HRMS (ESI)** calculated for C<sub>11</sub>H<sub>15</sub>NO<sub>3</sub>Na [M+Na]<sup>+</sup>: 232.0944; Found: 232.0943.



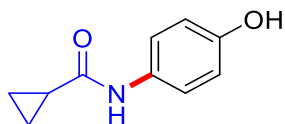

2n

***N*-(4-hydroxyphenyl)cyclopropanecarboxamide, 2n, white solid, 30.1 mg, 0.17 mmol, yield: 85%**

**<sup>1</sup>H NMR (500 MHz, DMSO):**  $\delta$  9.90 (s, 1H), 9.12 (s, 1H), 7.35 (d,  $J = 8.8$  Hz, 2H), 6.67 (d,  $J = 8.8$  Hz, 2H), 1.71 (m, 1H), 0.80–0.67 (m, 4H). **<sup>13</sup>C NMR (126 MHz, DMSO):**  $\delta$  171.27, 153.49, 131.55, 121.22, 115.42, 14.74, 7.15. **HRMS (ESI)** calculated for C<sub>10</sub>H<sub>11</sub>NO<sub>2</sub>Na [M+Na]<sup>+</sup>: 200.0682; Found: 200.0688.

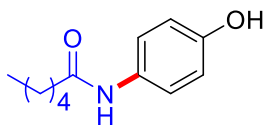

2o

***N*-(4-hydroxyphenyl)hexanamide, 2o, white solid, 21.9 mg, 0.106 mmol, yield: 53%**

**<sup>1</sup>H NMR (500 MHz, DMSO):**  $\delta$  9.56 (s, 1H), 9.10 (s, 1H), 7.38–7.30 (m, 2H), 6.70–6.61 (m, 2H), 2.22 (t,  $J = 7.4$  Hz, 2H), 1.61–1.52 (m, 2H), 1.33–1.24 (m, 4H), 0.86 (t,  $J = 7.0$  Hz, 3H). **<sup>13</sup>C NMR (126 MHz, DMSO):**  $\delta$  170.92, 153.48, 131.48, 121.24, 115.38, 36.64, 31.36, 25.35, 22.33, 14.29. **HRMS (ESI)** calculated for C<sub>12</sub>H<sub>17</sub>NO<sub>2</sub>Na [M+Na]<sup>+</sup>: 230.1151; Found: 230.1151.

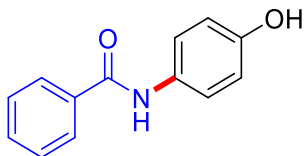

2p

***N*-(4-hydroxyphenyl)benzamide, 2p, white solid, 37.1 mg, 0.174 mmol, yield: 87%**

**<sup>1</sup>H NMR (500 MHz, DMSO):**  $\delta$  10.03 (s, 1H), 9.33 (s, 1H), 7.92 (d,  $J = 7.3$  Hz, 2H), 7.52 (m, 5H), 6.75 (d,  $J = 8.8$  Hz, 2H); **<sup>13</sup>C NMR (126 MHz, DMSO):**  $\delta$  165.51, 154.17, 135.53, 131.70, 131.06, 128.74, 127.89, 122.82, 115.43. **HRMS (ESI)** calculated for C<sub>13</sub>H<sub>11</sub>NO<sub>2</sub>Na [M+Na]<sup>+</sup>: 236.0682; Found: 236.0685.

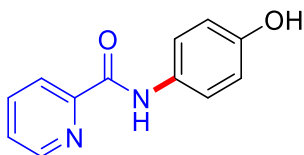

2q

***N*-(4-hydroxyphenyl)picolinamide, 2q, white solid, 34.2 mg, 0.16 mmol, yield: 80%**

**<sup>1</sup>H NMR (500 MHz, DMSO):**  $\delta$  10.39 (s, 1H), 9.29 (s, 1H), 8.70 (dd,  $J = 4.7, 0.6$  Hz, 1H), 8.13 (d,  $J = 7.8$  Hz, 1H), 8.04 (m, 1H), 7.68–7.65 (m, 2H), 7.64 (m, 1H), 6.79–6.71 (m, 2H); **<sup>13</sup>C NMR (126 MHz, DMSO):**  $\delta$  162.24, 154.34, 150.62, 148.76, 138.44,

130.40, 127.04, 122.54, 122.32, 115.51. **HRMS (ESI)** calculated for  $C_{12}H_{10}N_2O_2Na$   $[M+Na]^+$ : 237.0634; Found: 237.0636.

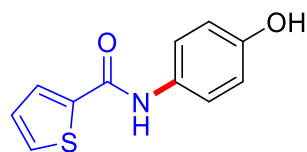

**2r**

***N*-(4-hydroxyphenyl)thiophene-2-carboxamide, 2r, white solid, 29.3 mg, 0.134 mmol, yield: 67%**

**$^1H$  NMR (400 MHz, DMSO):**  $\delta$  10.07 (s, 1H), 9.32 (s, 1H), 8.00 (d,  $J = 3.6$  Hz, 1H), 7.78 (t,  $J = 8.9$  Hz, 1H), 7.49 (d,  $J = 8.8$  Hz, 2H), 7.23–7.13 (m, 1H), 6.75 (d,  $J = 8.8$  Hz, 2H);  **$^{13}C$  NMR (101 MHz, DMSO):**  $\delta$  159.91, 154.31, 140.91, 131.71, 130.59, 129.06, 128.44, 122.86, 115.51. **HRMS (ESI)** calculated for  $C_{11}H_9NO_2SNa$   $[M+Na]^+$ : 242.0246; Found: 242.0255.

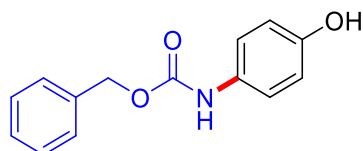

**2s**

***N*-(4-hydroxyphenyl)acetamide, 2s, white solid, 31.1 mg, 0.128 mmol, yield: 64%**

**$^1H$  NMR (500 MHz, DMSO):**  $\delta$  9.42 (s, 1H), 9.14 (s, 1H), 7.43–7.35 (m, 4H), 7.35–7.31 (m, 1H), 7.24 (d,  $J = 7.7$  Hz, 2H), 6.71–6.66 (m, 2H), 5.11 (s, 2H);  **$^{13}C$  NMR (126 MHz, DMSO):**  $\delta$  190.49, 154.02, 153.36, 137.32, 130.96, 128.83, 128.37, 120.56, 115.61, 65.87. **HRMS (ESI)** calculated for  $C_{14}H_{13}NO_3Na$   $[M+Na]^+$ : 266.0788; Found: 266.0789.

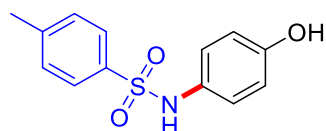

**2t**

***N*-(4-hydroxyphenyl)-4-methylbenzenesulfonamide, 2t, white solid, 33.7 mg, 0.128 mmol, yield: 64%**

**$^1H$  NMR (500 MHz, DMSO):**  $\delta$  9.66 (s, 1H), 9.32 (s, 1H), 7.55 (d,  $J = 8.2$  Hz, 2H), 7.28 (d,  $J = 8.1$  Hz, 2H), 6.86 (d,  $J = 8.8$  Hz, 2H), 6.62 (d,  $J = 8.8$  Hz, 2H), 2.29 (s, 3H).  **$^{13}C$  NMR (126 MHz, DMSO):**  $\delta$  155.22, 143.25, 137.16, 129.86, 129.05, 127.18, 124.38, 115.96, 21.33. **HRMS (ESI)** calculated for  $C_{13}H_{13}NO_3SNa$   $[M+Na]^+$ : 286.0508; Found: 286.0511.

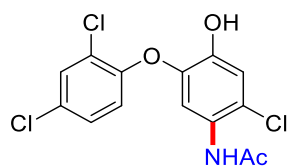

**2u**

***N*-(2-chloro-5-(2,4-dichlorophenoxy)-4-hydroxyphenyl)acetamide, 2u, white solid, 57.3 mg, 0.166 mmol, yield: 83%**

**<sup>1</sup>H NMR (500 MHz, CDCl<sub>3</sub>):** δ 7.77 (s, 1H), 7.45 (d, *J* = 10.2 Hz, 1H), 7.42 (d, *J* = 2.4 Hz, 1H), 7.16 (dt, *J* = 14.1, 7.0 Hz, 1H), 7.04 (s, 1H), 6.93 (d, *J* = 8.8 Hz, 1H), 6.50 (s, 1H), 2.15 (s, 3H). **<sup>13</sup>C NMR (126 MHz, CDCl<sub>3</sub>):** δ 168.42, 150.39, 143.91, 141.96, 130.52, 129.75, 128.18, 127.27, 125.79, 120.42, 118.70, 116.65, 112.15, 77.27, 77.01, 76.76, 24.41. **HRMS (ESI)** calculated for C<sub>14</sub>H<sub>10</sub>Cl<sub>3</sub>NO<sub>3</sub>Na [M+Na]<sup>+</sup>: 367.9618; Found: 367.9614.

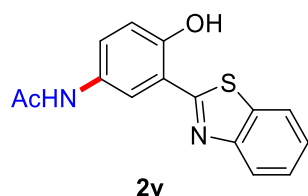

***N*-(3-(benzo[d]thiazol-2-yl)-4-hydroxyphenyl)acetamide, 2v, white solid, 18.9 mg, 0.072 mmol, yield: 72%**

**<sup>1</sup>H NMR (300 MHz, DMSO):** δ 11.30 (s, 1H), 9.96 (s, 1H), 8.44 (d, *J* = 2.5 Hz, 1H), 8.12 (d, *J* = 7.6 Hz, 1H), 8.04 (d, *J* = 7.9 Hz, 1H), 7.62 (dd, *J* = 8.8, 2.6 Hz, 1H), 7.57 – 7.47 (m, 1H), 7.43 (dd, *J* = 11.1, 4.0 Hz, 1H), 7.01 (d, *J* = 8.8 Hz, 1H), 2.03 (s, 3H). **<sup>13</sup>C NMR (75 MHz, DMSO):** δ 168.45, 165.26, 152.53, 151.92, 134.92, 132.26, 130.09, 126.92, 125.51, 124.45, 122.56, 119.02, 118.50, 117.46, 24.29. **HRMS (ESI)** calculated for C<sub>15</sub>H<sub>13</sub>N<sub>2</sub>O<sub>2</sub>S [M+H]<sup>+</sup> Exact Mass: 285.0692; Found: 285.0685.

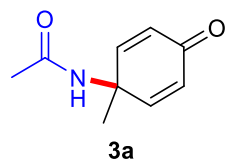

***N*-(1-methyl-4-oxocyclohexa-2,5-dien-1-yl)acetamide, 3a, white solid, 23.6 mg, 0.156 mmol, yield: 78%**

**<sup>1</sup>H NMR (400 MHz, Acetone):** δ 7.54 (s, 1H), 6.95 (d, *J* = 10.1 Hz, 2H), 6.08 (d, *J* = 10.1 Hz, 2H), 1.87 (s, 3H), 1.47 (s, 3H). **<sup>13</sup>C NMR (101 MHz, Acetone):** δ 184.56, 168.98, 152.75, 126.96, 52.19, 25.59, 22.20. **HRMS (ESI)** calculated for C<sub>9</sub>H<sub>11</sub>NO<sub>2</sub>Na [M+Na]<sup>+</sup>: 188.0682; Found: 188.0682.

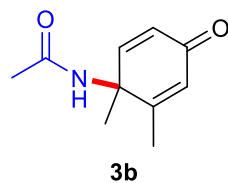

***N*-(1,2-dimethyl-4-oxocyclohexa-2,5-dien-1-yl)acetamide, 3b, white solid, 30.4 mg, 0.17 mmol, yield: 85%**

**<sup>1</sup>H NMR (500 MHz, DMSO):** δ 8.47 (s, 1H), 6.81 (d, *J* = 9.9 Hz, 1H), 5.99 (dd, *J* = 9.9, 1.4 Hz, 1H), 5.94 (s, 1H), 1.81 (s, 6H), 1.29 (s, 3H). **<sup>13</sup>C NMR (126 MHz, DMSO):** δ 185.58, 169.30, 163.71, 155.84, 54.66, 26.36, 22.77, 18.66. **HRMS (ESI)** calculated for C<sub>10</sub>H<sub>13</sub>NO<sub>2</sub>Na [M+Na]<sup>+</sup>: 202.0838; Found: 202.0839.

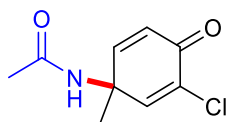

3c

***N*-(3-chloro-1-methyl-4-oxocyclohexa-2,5-dien-1-yl)acetamide, 3c, white solid, 31 mg, 0.156 mmol, yield: 78%**

**<sup>1</sup>H NMR (400 MHz, DMSO):**  $\delta$  8.60 (s, 1H), 7.23 (d,  $J = 2.7$  Hz, 1H), 6.96 (dd,  $J = 9.9, 2.7$  Hz, 1H), 6.21 (d,  $J = 9.9$  Hz, 1H), 1.82 (s, 3H), 1.42 (s, 3H). **<sup>13</sup>C NMR (101 MHz, DMSO):**  $\delta$  178.55, 169.87, 155.41, 151.07, 130.07, 125.70, 54.48, 25.71, 23.03. **HRMS (ESI)** calculated for C<sub>9</sub>H<sub>10</sub>ClNO<sub>2</sub>Na [M+Na]<sup>+</sup>: 222.0292; Found: 222.0285.

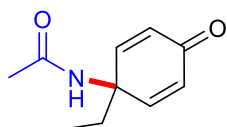

3d

***N*-(1-ethyl-4-oxocyclohexa-2,5-dien-1-yl)acetamide, 3d, white solid, 26.9 mg, 0.15 mmol, yield: 75%**

**<sup>1</sup>H NMR (500 MHz, DMSO):**  $\delta$  8.33 (s, 1H), 6.81 (d,  $J = 10.0$  Hz, 1H), 6.13 (d,  $J = 10.0$  Hz, 1H), 1.81 (s, 1H), 1.76 (q,  $J = 7.4$  Hz, 1H), 0.70 (t,  $J = 7.4$  Hz, 1H). **<sup>13</sup>C NMR (126 MHz, DMSO):**  $\delta$  185.70, 169.61, 152.87, 128.33, 56.26, 30.69, 23.21, 7.85. **HRMS (ESI)** calculated for C<sub>10</sub>H<sub>13</sub>NO<sub>2</sub>Na [M+Na]<sup>+</sup>: 202.0838; Found: 202.0837.

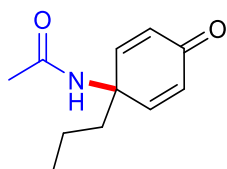

3e

***N*-(4-oxo-1-propylcyclohexa-2,5-dien-1-yl)acetamide, 3e, white solid, 31.7 mg, 0.164 mmol, yield: 82%**

**<sup>1</sup>H NMR (400 MHz, DMSO):**  $\delta$  8.32 (s, 1H), 6.87 (d,  $J = 9.9$  Hz, 2H), 6.12 (d,  $J = 9.9$  Hz, 2H), 1.82 (s, 3H), 1.75–1.66 (m, 2H), 1.20–1.09 (m, 2H), 0.83 (t,  $J = 7.3$  Hz, 3H). **<sup>13</sup>C NMR (101 MHz, DMSO):**  $\delta$  185.74, 169.65, 153.28, 128.07, 55.92, 23.26, 16.65, 14.38. **HRMS (ESI)** calculated for C<sub>11</sub>H<sub>15</sub>NO<sub>2</sub>Na [M+Na]<sup>+</sup>: 216.0995; Found: 216.0987.

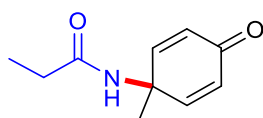

3f

***N*-(1-methyl-4-oxocyclohexa-2,5-dien-1-yl)propionamide, 3f, white solid, 28.6 mg, 0.16 mmol, yield: 80%**

**<sup>1</sup>H NMR (400 MHz, DMSO)**  $\delta$  8.35 (s, 1H), 6.91 (d,  $J = 10.0$  Hz, 2H), 6.06 (d,  $J = 10.0$  Hz, 2H), 2.10 (q,  $J = 7.6$  Hz, 2H), 1.36 (s, 3H), 0.94 (t,  $J = 7.6$  Hz, 3H). **<sup>13</sup>C NMR**

(101 MHz, DMSO)  $\delta$  185.43, 173.33, 154.78, 126.90, 52.32, 28.70, 26.26, 10.11. HRMS (ESI) calculated for C<sub>10</sub>H<sub>13</sub>NO<sub>2</sub>Na [M+Na]<sup>+</sup> : 202.0838; Found: 202.0840.

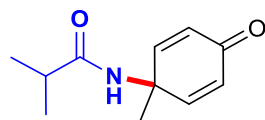

3g

***N*-(1-methyl-4-oxocyclohexa-2,5-dien-1-yl)isobutyramide, 3g, white solid, 23.5 mg, 0.122 mmol, yield: 61%**

<sup>1</sup>H NMR (400 MHz, DMSO)  $\delta$  8.22 (s, 1H), 6.90 (d, *J* = 9.9 Hz, 2H), 6.07 (d, *J* = 9.9 Hz, 2H), 2.42 (dt, *J* = 13.5, 6.7 Hz, 1H), 1.37 (s, 3H), 0.97 (d, *J* = 6.8 Hz, 6H). <sup>13</sup>C NMR (101 MHz, DMSO):  $\delta$  185.36, 176.56, 154.75, 126.95, 52.24, 34.09, 26.27, 19.94. HRMS (ESI) calculated for C<sub>11</sub>H<sub>15</sub>NO<sub>2</sub>Na [M+Na]<sup>+</sup> : 216.0995; Found: 216.1008.

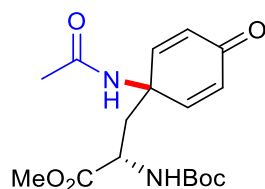

3h

**methyl-3-(1-acetamido-4-oxocyclohexa-2,5-dien-1-yl)-2-((tert-butoxycarbonyl)amino)propanoate, 3h, white solid, 39.4 mg, 0.112 mmol, yield: 56%**

<sup>1</sup>H NMR (400 MHz, DMSO):  $\delta$  8.35 (s, 1H), 7.30 (d, *J* = 8.6 Hz, 1H), 6.87 (d, *J* = 9.8 Hz, 2H), 6.18 (d, *J* = 9.7 Hz, 1H), 6.03 (d, *J* = 9.9 Hz, 1H), 3.91 (t, *J* = 8.1 Hz, 1H), 3.60 (s, 3H), 2.41 (d, *J* = 12.3 Hz, 1H), 2.17 (dd, *J* = 13.9, 10.0 Hz, 1H), 1.81 (s, 3H), 1.34 (s, 9H). <sup>13</sup>C NMR (101 MHz, DMSO):  $\delta$  185.31, 172.76, 169.63, 155.22, 150.97, 150.58, 129.15, 127.74, 78.78, 54.95, 52.60, 49.66, 28.63, 23.42. HRMS (ESI) calculated for C<sub>17</sub>H<sub>24</sub>N<sub>2</sub>O<sub>6</sub>Na [M+Na]<sup>+</sup> : 375.1527; Found: 375.1531.

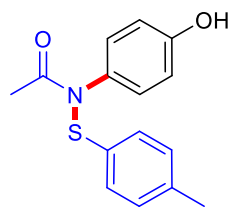

5a

***N*-(4-hydroxyphenyl)-*N*-(p-tolylthio)acetamide, 5a, white solid, 43.7 mg, 0.168 mmol, yield: 84%**

<sup>1</sup>H NMR (400 MHz, DMSO):  $\delta$  9.66 (s, 1H), 7.21 (s, 4H), 7.03 (d, *J* = 7.7 Hz, 2H), 6.72 (d, *J* = 7.9 Hz, 2H), 2.28 (s, 3H), 2.12 (s, 3H); <sup>13</sup>C NMR (101 MHz, DMSO):  $\delta$  173.68, 157.07, 137.28, 134.50, 130.37, 128.57, 126.45, 116.03, 22.99, 21.06; HRMS (ESI) calculated for C<sub>15</sub>H<sub>16</sub>NO<sub>2</sub>S [M+H]<sup>+</sup> : 274.0896; Found: 274.0906.

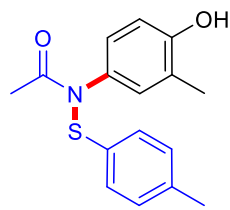

5b

***N*-(4-hydroxy-3-methylphenyl)-*N*-(*p*-tolylthio)acetamide, 5b, white solid, 47 mg, 0.164 mmol, yield:82%**

**<sup>1</sup>H NMR (400 MHz, DMSO)** δ 9.56 (s, 1H), 7.25–7.17 (m, 4H), 6.97 (d, *J* = 2.1 Hz, 1H), 6.85 (dd, *J* = 8.4, 2.6 Hz, 1H), 6.73 (d, *J* = 8.5 Hz, 1H), 2.28 (s, 3H), 2.12 (s, 3H), 2.08 (s, 3H). **<sup>13</sup>C NMR (101 MHz, DMSO)** δ 173.29, 155.20, 137.18, 137.02, 134.62, 130.33, 129.53, 126.30, 125.66, 125.11, 115.09, 22.98, 21.33, 16.42.; **HRMS (ESI)** calculated for C<sub>16</sub>H<sub>18</sub>NO<sub>2</sub>S [M+H]<sup>+</sup>: 288.1053; Found: 288.1062.

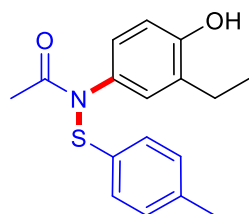

5c

***N*-(3-ethyl-4-hydroxyphenyl)-*N*-(*p*-tolylthio)acetamide, 5c, white solid, 50 mg, 0.166 mmol, yield: 83%**

**<sup>1</sup>H NMR (400 MHz, DMSO):** δ 9.53 (s, 1H), 7.26–7.17 (m, 4H), 6.91 (d, *J* = 2.3 Hz, 1H), 6.85 (dd, *J* = 8.4, 2.5 Hz, 1H), 6.73 (d, *J* = 8.4 Hz, 1H), 2.48 (q, *J* = 7.4 Hz, 2H), 2.29 (s, 3H), 2.13 (s, 3H), 1.07 (t, *J* = 7.5 Hz, 3H). **<sup>13</sup>C NMR (101 MHz, DMSO)** δ 173.76, 154.75, 137.29, 134.5, 131.03, 130.31, 127.92, 126.63, 125.59, 115.31, 105.12, 22.99, 21.07, 14.26. **HRMS (ESI)** HRMS (ESI) calculated for C<sub>17</sub>H<sub>20</sub>NO<sub>2</sub>S [M+H]<sup>+</sup>: 302.1209; Found: 302.1205.

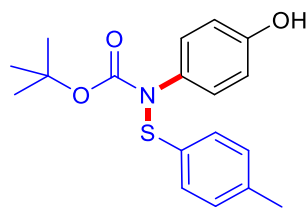

5d

***tert*-butyl (4-hydroxyphenyl)(*p*-tolylthio)carbamate, 5d, white solid, 27.8 mg, 0.084 mmol, yield: 42%**

**<sup>1</sup>H NMR (500 MHz, DMSO):** δ 9.49 (s, 1H), 7.21–7.16 (m, 4H), 6.94 (d, *J* = 8.8 Hz, 2H), 6.64 (d, *J* = 8.8 Hz, 2H), 2.27 (s, 3H), 1.36 (s, 9H); **<sup>13</sup>C NMR (126 MHz, DMSO):** δ 156.33, 155.61, 137.30, 137.14, 135.28, 130.28, 127.99, 126.38, 115.55, 81.95, 28.10, 21.04; **HRMS (ESI)** calculated for C<sub>18</sub>H<sub>21</sub>NNaO<sub>3</sub>S [M+Na]<sup>+</sup>: 354.1041; Found: 354.1047.

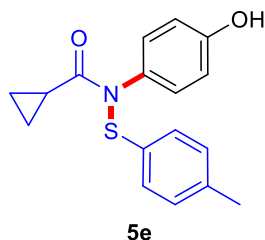

***N*-(4-hydroxyphenyl)-*N*-(*p*-tolylthio)cyclopropanecarboxamide, 5e, white solid, 26.9 mg, 0.09 mmol, yield: 45%**

**<sup>1</sup>H NMR (400 MHz, DMSO):** δ 9.65 (s, 1H), 7.21 (s, 4H), 7.01 (d, *J* = 8.4 Hz, 2H), 6.72 (d, *J* = 8.5 Hz, 2H), 2.29 (s, 3H), 2.04–1.89 (m, 1H), 0.88–0.80 (m, 4H); **<sup>13</sup>C NMR (101 MHz, DMSO):** δ 176.60, 157.05, 137.49, 136.87, 134.67, 130.37, 128.67, 126.82, 116.10, 21.07, 12.66, 9.81; **HRMS (ESI)** calculated for C<sub>17</sub>H<sub>18</sub>NO<sub>2</sub>S [M+H]<sup>+</sup> : 300.1053; Found: 300.1064.

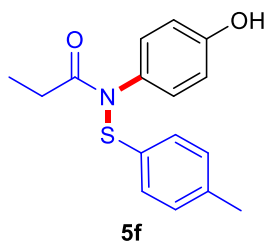

***N*-(4-hydroxyphenyl)-*N*-(*p*-tolylthio)acetamide, 5f, white solid, 42.4 mg, 0.16 mmol, yield: 80%**

**<sup>1</sup>H NMR (500 MHz, DMSO):** δ 9.64 (s, 1H), 7.19 (s, 4H), 7.02–6.98 (m, 2H), 6.71 (d, *J* = 8.7 Hz, 2H), 2.39 (s, 2H), 2.27 (s, 3H), 0.99 (t, *J* = 7.3 Hz, 3H). **<sup>13</sup>C NMR (126 MHz, DMSO):** δ 176.65, 157.05, 137.23, 136.91, 134.61, 130.29, 128.62, 126.47, 116.02, 27.64, 21.01, 10.01. **HRMS (ESI)** calculated for C<sub>16</sub>H<sub>18</sub>NO<sub>2</sub>S [M+H]<sup>+</sup> : 288.1053; Found: 288.1049.

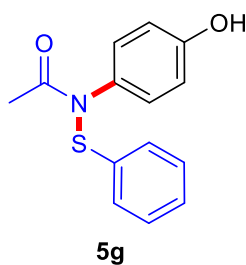

***N*-(4-hydroxyphenyl)-*N*-(phenylthio)acetamide, 5g, white solid, 44 mg, 0.17 mmol, yield: 85%**

**<sup>1</sup>H NMR (400 MHz, DMSO):** δ 9.65 (s, 1H), 7.47–7.21 (m, 5H), 7.10 (d, *J* = 7.4 Hz, 2H), 6.75 (d, *J* = 7.5 Hz, 2H), 2.16 (s, 3H); **<sup>13</sup>C NMR (101 MHz, DMSO):** δ 173.67, 157.16, 138.20, 137.18, 129.75, 128.54, 127.17, 124.95, 116.08, 22.93; **HRMS (ESI)** calculated for C<sub>14</sub>H<sub>14</sub>NO<sub>2</sub>S [M+H]<sup>+</sup> : 260.0740; Found: 260.0742.

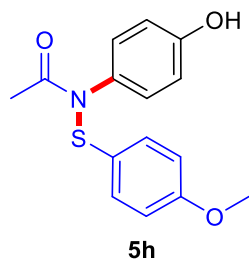

***N*-(4-hydroxyphenyl)-*N*-((4-methoxyphenyl)thio)acetamide, 5h, white solid, 43.4 mg, 0.165 mmol, yield: 75%**

**<sup>1</sup>H NMR (500 MHz, DMSO):** δ 9.61 (s, 1H), 7.32 (d, *J* = 8.4 Hz, 2H), 6.94 (d, *J* = 8.5 Hz, 2H), 6.89 (d, *J* = 8.4 Hz, 2H), 6.69 (d, *J* = 8.4 Hz, 2H), 2.01 (s, 3H); **<sup>13</sup>C NMR (126 MHz, DMSO):** δ 173.33, 160.20, 157.01, 137.17, 131.83, 128.70, 128.07, 116.05, 115.33, 55.74, 23.06; **HRMS (ESI)** calculated for C<sub>15</sub>H<sub>16</sub>NO<sub>3</sub>S [M+H]<sup>+</sup>: 290.0845; Found: 290.0857.

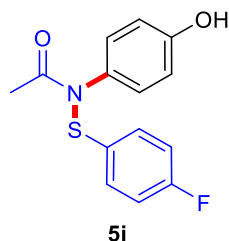

***N*-((4-fluorophenyl)thio)-*N*-(4-hydroxyphenyl)acetamide, 5i, white solid, 34.9 mg, 0.126 mmol, yield: 63%**

**<sup>1</sup>H NMR (400 MHz, DMSO):** δ 9.66 (s, 1H), 7.43–7.34 (m, 2H), 7.24 (t, *J* = 8.9 Hz, 2H), 7.03 (d, *J* = 8.7 Hz, 2H), 6.72 (d, *J* = 8.7 Hz, 2H), 2.11 (s, 3H); **<sup>13</sup>C NMR (101 MHz, DMSO):** δ 161.94 (d, *J* = 244.8 Hz), 157.20, 137.05, 133.50 (d, *J* = 2.9 Hz), 129.13, 128.64, 116.82 (d, *J* = 22.2 Hz), 116.11, 23.03; **<sup>19</sup>F NMR (376 MHz, DMSO):** δ -114.63; **HRMS (ESI)** calculated for C<sub>14</sub>H<sub>13</sub>FNO<sub>2</sub>S [M+H]<sup>+</sup>: 278.0646; Found: 278.0644.

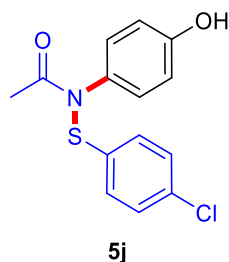

***N*-((4-chlorophenyl)thio)-*N*-(4-hydroxyphenyl)acetamide, 5j, white solid, 46.3 mg, 0.158 mmol, yield: 79%**

**<sup>1</sup>H NMR (400 MHz, DMSO):** δ 9.67 (s, 1H), 7.46–7.42 (m, 2H), 7.35–7.30 (m, 2H), 7.10 (d, *J* = 8.6 Hz, 2H), 6.73 (d, *J* = 8.8 Hz, 2H), 2.11 (s, 3H); **<sup>13</sup>C NMR (101 MHz, DMSO):** δ 173.66, 157.28, 137.28, 136.98, 131.72, 129.66, 128.59, 126.85, 116.12, 22.96; **HRMS (ESI)** calculated for C<sub>14</sub>H<sub>13</sub>ClNO<sub>2</sub>S [M+H]<sup>+</sup>: 294.0350; Found: 294.0356.



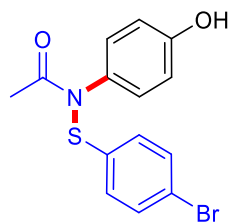

5k

***N*-((4-bromophenyl)thio)-*N*-(4-hydroxyphenyl)acetamide, 5k, white solid, 48.5 mg, 0.144 mmol, yield: 72%**

**<sup>1</sup>H NMR (400 MHz, DMSO):** δ 9.69 (s, 1H), 7.55 (d, *J* = 8.5 Hz, 2H), 7.26 (d, *J* = 8.5 Hz, 2H), 7.10 (d, *J* = 8.5 Hz, 2H), 6.74 (d, *J* = 8.4 Hz, 2H), 2.12 (s, 3H); **<sup>13</sup>C NMR (101 MHz, DMSO):** δ 173.69, 157.28, 137.85, 136.97, 132.52, 128.58, 126.96, 119.98, 116.15, 22.97; **HRMS (ESI)** calculated for C<sub>14</sub>H<sub>13</sub>BrNO<sub>2</sub>S [M+H]<sup>+</sup> : 337.9845; Found: 337.9845.

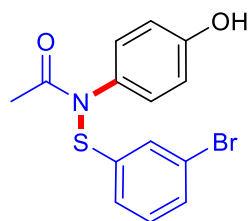

5l

***N*-((3-bromophenyl)thio)-*N*-(4-hydroxyphenyl)acetamide, 5l, white solid, 49.9 mg, 0.148 mmol, yield: 74%**

**<sup>1</sup>H NMR (400 MHz, DMSO):** δ 9.72 (s, 1H), 7.45 (s, 1H), 7.41 (m, 1H), 7.36–7.28 (m, 2H), 7.13 (d, *J* = 8.6 Hz, 2H), 6.75 (d, *J* = 8.7 Hz, 2H), 2.13 (s, 3H); **<sup>13</sup>C NMR (101 MHz, DMSO):** δ 173.53, 157.32, 141.12, 136.91, 131.68, 129.73, 128.55, 126.51, 123.47, 122.87, 116.18, 23.01; **HRMS (ESI)** calculated for C<sub>14</sub>H<sub>13</sub>BrNO<sub>2</sub>S [M+H]<sup>+</sup> : 337.9845; Found: 337.9843.

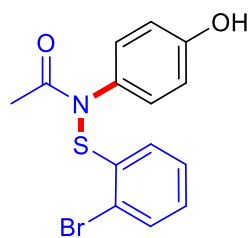

5m

***N*-((2-bromophenyl)thio)-*N*-(4-hydroxyphenyl)acetamide, 5m, white solid, 44.5 mg, 0.132 mmol, yield: 66%**

**<sup>1</sup>H NMR (500 MHz, DMSO):** δ 9.72 (s, 1H), 7.55 (d, *J* = 7.9, 1H), 7.45 (m, 1H), 7.36 (d, *J* = 7.4 Hz, 1H), 7.25 (d, *J* = 8.1 Hz, 2H), 7.12 (m, 1H), 6.74 (d, *J* = 8.7 Hz, 2H), 2.12 (s, 3H); **<sup>13</sup>C NMR (126 MHz, DMSO):** δ 173.34, 157.37, 138.59, 136.73, 133.18, 128.96, 128.63, 127.66, 124.16, 116.17, 115.54, 22.88; **HRMS (ESI)** calculated for C<sub>14</sub>H<sub>12</sub>BrNNaO<sub>2</sub>S [M+Na]<sup>+</sup> : 359.9664; Found: 359.9668.

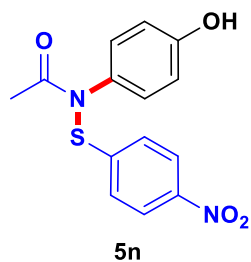

***N*-(4-hydroxyphenyl)-*N*-((4-nitrophenyl)thio)acetamide, **5n**, white solid, 47.7 mg, 0.144 mmol, yield: 72%**

**<sup>1</sup>H NMR (500 MHz, DMSO):**  $\delta$  9.74 (s, 1H), 8.20 (d,  $J = 8.5$  Hz, 2H), 7.53 (d,  $J = 8.4$  Hz, 2H), 7.25 (d,  $J = 7.8$  Hz, 2H), 6.75 (d,  $J = 8.3$  Hz, 2H), 2.14 (s, 3H); **<sup>13</sup>C NMR (126 MHz, DMSO):**  $\delta$  173.34, 157.55, 148.30, 145.77, 136.64, 128.67, 124.70, 123.43, 116.27, 22.87; **HRMS (ESI)** calculated for C<sub>18</sub>H<sub>21</sub>NNaO<sub>3</sub>S [M+Na]<sup>+</sup>: 354.1134; Found: 354.1147.

## Supplementary Tables

**Supplementary Table 1.** Screening of Se-catalyzed *para*-amination of phenols<sup>a</sup>:

| Entry           | Catalyst  | Solvent     | Yield <sup>b</sup> (%) |
|-----------------|-----------|-------------|------------------------|
| 1 <sup>c</sup>  | <b>C1</b> | TFE         | 47                     |
| 2 <sup>d</sup>  | <b>C1</b> | TFE         | 42                     |
| 3               | <b>C1</b> | TFE         | 38                     |
| 4               | <b>C2</b> | TFE         | N.D.                   |
| 5               | <b>C3</b> | TFE         | N.D.                   |
| 6               | <b>C4</b> | TFE         | 60                     |
| 7               | <b>C5</b> | TFE         | 79                     |
| 8               | <b>C5</b> | MeOH        | N.D.                   |
| 9               | <b>C5</b> | DMSO        | N.D.                   |
| 10              | <b>C5</b> | THF         | 73                     |
| 11              | <b>C5</b> | MeCN        | 86                     |
| 12              | <b>C5</b> | EA          | 78                     |
| 13              | <b>C5</b> | 1,4-dioxane | 93(90 <sup>e</sup> )   |
| 14 <sup>f</sup> | <b>C5</b> | 1,4-dioxane | 92                     |
| 15              | -         | 1,4-dioxane | N.D.                   |

<sup>a</sup>Standard conditions: **1a** (0.10 mmol), catalysts (10 mol%), solvents (1.0 mL), at ambient temperature for 8 h; <sup>b</sup>NMR yield used 1,4-dimethoxybenzene as internal standard. <sup>c</sup>0.5 equiv. CsOAc and 1.0 equiv. **C1** were used; <sup>d</sup>1.0 equiv. **C1** were used; <sup>e</sup>Isolated yield; <sup>f</sup>Run under N<sub>2</sub>; TFE, 2,2,2-trifluoroethanol; N.D. = not detected.



|                                               |                                                               |
|-----------------------------------------------|---------------------------------------------------------------|
| $\gamma/^\circ$                               | 90                                                            |
| Volume/ $\text{\AA}^3$                        | 1843(3)                                                       |
| Z                                             | 8                                                             |
| $\rho_{\text{calc}}/\text{cm}^3$              | 1.277                                                         |
| $\mu/\text{mm}^{-1}$                          | 0.090                                                         |
| F(000)                                        | 752.0                                                         |
| Crystal size/ $\text{mm}^3$                   | $0.26 \times 0.25 \times 0.22$                                |
| Radiation                                     | Mo K $\alpha$ ( $\lambda = 0.71073$ )                         |
| $2\Theta$ range for data collection/ $^\circ$ | 5.794 to 50.004                                               |
| Index ranges                                  | $-13 \leq h \leq 14, -13 \leq k \leq 9, -15 \leq l \leq 15$   |
| Reflections collected                         | 9500                                                          |
| Independent reflections                       | 1622 [ $R_{\text{int}} = 0.0391, R_{\text{sigma}} = 0.0263$ ] |
| Data/restraints/parameters                    | 1622/0/119                                                    |
| Goodness-of-fit on $F^2$                      | 1.112                                                         |
| Final R indexes [ $I \geq 2\sigma(I)$ ]       | $R_1 = 0.0393, wR_2 = 0.1168$                                 |
| Final R indexes [all data]                    | $R_1 = 0.0517, wR_2 = 0.1282$                                 |
| Largest diff. peak/hole / $e \text{\AA}^{-3}$ | 0.19/-0.15                                                    |

**Supplementary Table 4.** Fractional Atomic Coordinates ( $\times 10^4$ ) and Equivalent Isotropic Displacement Parameters ( $\text{\AA}^2 \times 10^3$ ) for **2n**.  $U(\text{eq})$  is defined as 1/3 of the trace of the orthogonalized  $U^{ij}$  tensor.

| Atom | x          | y          | z          | U(eq)   |
|------|------------|------------|------------|---------|
| O1   | 4999.3(8)  | 5326.4(12) | 6384.1(9)  | 47.0(4) |
| O2   | 1946.8(10) | 8678.5(12) | 3574.6(9)  | 53.2(4) |
| N1   | 3384.4(10) | 6049.1(13) | 6873.8(10) | 39.4(4) |
| C1   | 4926.8(17) | 3689(2)    | 8131(2)    | 74.9(7) |
| C2   | 5523(2)    | 4739(3)    | 8442(2)    | 83.0(8) |
| C3   | 4421.5(15) | 4912.0(19) | 8036.5(14) | 52.2(5) |
| C4   | 4305.5(13) | 5443.3(15) | 7031.1(12) | 37.3(4) |
| C5   | 3046.6(12) | 6699.1(14) | 6013.1(12) | 34.9(4) |
| C6   | 3511.8(14) | 6577.0(18) | 5082.2(13) | 46.8(5) |
| C7   | 3124.7(14) | 7237.1(19) | 4287.1(13) | 51.6(5) |
| C8   | 2273.5(12) | 8029.0(16) | 4399.9(12) | 39.4(4) |
| C9   | 1797.3(14) | 8142.6(17) | 5319.7(13) | 45.3(5) |
| C10  | 2184.3(13) | 7488.9(17) | 6117.9(13) | 43.6(5) |

**Supplementary Table 5.** Anisotropic Displacement Parameters ( $\text{\AA}^2 \times 10^3$ ) for **2n**. The Anisotropic displacement factor exponent takes the form:  $-2\pi^2 [h^2 a^{*2} U_{11} + 2hka^* b^* U_{12} + \dots]$ .

| Atom | U <sub>11</sub> | U <sub>22</sub> | U <sub>33</sub> | U <sub>23</sub> | U <sub>13</sub> | U <sub>12</sub> |
|------|-----------------|-----------------|-----------------|-----------------|-----------------|-----------------|
| O1   | 34.0(7)         | 63.1(9)         | 43.8(7)         | -3.1(6)         | 4.7(5)          | 3.1(5)          |
| O2   | 44.9(7)         | 78.4(10)        | 36.2(7)         | 13.1(6)         | 6.5(5)          | 15.3(6)         |
| N1   | 37.3(7)         | 49.3(9)         | 31.7(8)         | 2.3(6)          | 7.3(6)          | 5.9(6)          |
| C1   | 62.0(14)        | 69.5(16)        | 93.3(17)        | 29.7(13)        | 9.8(12)         | 12.9(12)        |
| C2   | 66.2(15)        | 111(2)          | 71.6(16)        | 36.8(15)        | -25.2(12)       | -17.0(15)       |
| C3   | 50.4(11)        | 61.5(13)        | 44.7(11)        | 8.8(9)          | 4.5(9)          | 13.7(9)         |
| C4   | 36.0(8)         | 38.1(9)         | 37.6(9)         | -4.1(7)         | 1.3(7)          | -2.0(7)         |
| C5   | 32.7(8)         | 40.3(9)         | 31.5(9)         | -2.4(7)         | 2.8(6)          | -0.3(7)         |
| C6   | 42.8(10)        | 58.6(12)        | 39.1(10)        | 0.1(8)          | 8.9(7)          | 15.2(9)         |
| C7   | 48.8(10)        | 74.2(14)        | 31.8(10)        | 1.1(9)          | 12.1(8)         | 15.2(10)        |
| C8   | 35.5(9)         | 50.4(10)        | 32.3(9)         | 3.3(7)          | 1.1(7)          | 1.0(7)          |
| C9   | 39.6(9)         | 56.2(12)        | 40.1(10)        | -0.3(8)         | 6.9(8)          | 12.8(8)         |
| C10  | 42.1(9)         | 56.6(11)        | 32.1(9)         | -1.0(8)         | 9.5(7)          | 10.6(8)         |

**Supplementary Table 6.** Bond Lengths for **2n**.

| Atom | Atom | Length/Å | Atom | Atom | Length/Å |
|------|------|----------|------|------|----------|
| O1   | C4   | 1.234(2) | C3   | C4   | 1.475(3) |
| O2   | C8   | 1.378(2) | C5   | C6   | 1.383(3) |
| N1   | C4   | 1.348(2) | C5   | C10  | 1.392(2) |
| N1   | C5   | 1.421(2) | C6   | C7   | 1.377(3) |
| C1   | C2   | 1.436(4) | C7   | C8   | 1.384(3) |
| C1   | C3   | 1.491(3) | C8   | C9   | 1.374(2) |
| C2   | C3   | 1.494(3) | C9   | C10  | 1.376(3) |

**Supplementary Table 7.** Bond Angles for **2n**.

| Atom | Atom | Atom | Angle/°    | Atom | Atom | Atom | Angle/°    |
|------|------|------|------------|------|------|------|------------|
| C4   | N1   | C5   | 129.04(13) | C6   | C5   | C10  | 118.55(16) |
| C2   | C1   | C3   | 61.33(18)  | C10  | C5   | N1   | 117.54(14) |
| C1   | C2   | C3   | 61.14(15)  | C7   | C6   | C5   | 119.89(17) |
| C1   | C3   | C2   | 57.53(15)  | C6   | C7   | C8   | 121.18(16) |
| C4   | C3   | C1   | 118.42(18) | O2   | C8   | C7   | 117.80(15) |
| C4   | C3   | C2   | 118.21(18) | O2   | C8   | C9   | 122.92(16) |
| O1   | C4   | N1   | 122.94(15) | C9   | C8   | C7   | 119.28(15) |
| O1   | C4   | C3   | 122.07(15) | C10  | C9   | C8   | 119.76(16) |
| N1   | C4   | C3   | 114.99(14) | C9   | C10  | C5   | 121.33(15) |
| C6   | C5   | N1   | 123.89(15) |      |      |      |            |

**Supplementary Table 8.** Torsion Angles for **2n**.

| A  | B  | C   | D   | Angle/°     | A   | B  | C   | D   | Angle/°     |
|----|----|-----|-----|-------------|-----|----|-----|-----|-------------|
| O2 | C8 | C9  | C10 | -178.25(17) | C4  | N1 | C5  | C10 | -164.63(17) |
| N1 | C5 | C6  | C7  | 179.42(17)  | C5  | N1 | C4  | O1  | -3.5(3)     |
| N1 | C5 | C10 | C9  | -179.20(16) | C5  | N1 | C4  | C3  | 177.24(16)  |
| C1 | C2 | C3  | C4  | -107.4(2)   | C5  | C6 | C7  | C8  | 0.1(3)      |
| C1 | C3 | C4  | O1  | -38.2(3)    | C6  | C5 | C10 | C9  | -0.2(3)     |
| C1 | C3 | C4  | N1  | 141.09(18)  | C6  | C7 | C8  | O2  | 178.55(18)  |
| C2 | C1 | C3  | C4  | 107.0(2)    | C6  | C7 | C8  | C9  | -1.0(3)     |
| C2 | C3 | C4  | O1  | 28.1(3)     | C7  | C8 | C9  | C10 | 1.3(3)      |
| C2 | C3 | C4  | N1  | -152.64(19) | C8  | C9 | C10 | C5  | -0.7(3)     |
| C4 | N1 | C5  | C6  | 16.4(3)     | C10 | C5 | C6  | C7  | 0.5(3)      |

**Supplementary Table 9.** Hydrogen Atom Coordinates ( $\text{\AA} \times 10^4$ ) and Isotropic Displacement Parameters ( $\text{\AA}^2 \times 10^3$ ) for **2n**.

| Atom | x    | y    | z    | U(eq) |
|------|------|------|------|-------|
| H2   | 1367 | 8996 | 3689 | 80    |
| H1   | 2940 | 6041 | 7363 | 47    |
| H1A  | 4659 | 3150 | 8647 | 90    |
| H1B  | 5149 | 3284 | 7522 | 90    |
| H2A  | 6118 | 4993 | 8027 | 100   |
| H2B  | 5628 | 4859 | 9152 | 100   |
| H3   | 3862 | 5110 | 8522 | 63    |
| H6   | 4085 | 6050 | 4993 | 56    |
| H7   | 3441 | 7149 | 3663 | 62    |
| H9   | 1216 | 8659 | 5402 | 54    |
| H10  | 1863 | 7577 | 6740 | 52    |

**Supplementary Table 10.** Crystal data and structure refinement for **5a**.

|                      |                                                 |                             |
|----------------------|-------------------------------------------------|-----------------------------|
| Identification code  | <b>5a</b>                                       |                             |
| Empirical formula    | $\text{C}_{15}\text{H}_{15}\text{NO}_2\text{S}$ |                             |
| Formula weight       | 273.34                                          |                             |
| Temperature          | 296(2) K                                        |                             |
| Wavelength           | 0.71073 $\text{\AA}$                            |                             |
| Crystal system       | Triclinic                                       |                             |
| Space group          | P-1                                             |                             |
| Unit cell dimensions | $a = 5.897(5) \text{\AA}$                       | $\alpha = 90.141(14)^\circ$ |

|                                         |                                                            |                             |
|-----------------------------------------|------------------------------------------------------------|-----------------------------|
|                                         | $b = 14.261(12) \text{ \AA}$                               | $\beta = 92.047(13)^\circ$  |
|                                         | $c = 16.469(14) \text{ \AA}$                               | $\gamma = 96.973(13)^\circ$ |
| Volume                                  | 1374(2) $\text{\AA}^3$                                     |                             |
| Z                                       | 4                                                          |                             |
| Density (calculated)                    | 1.321 $\text{Mg/m}^3$                                      |                             |
| Absorption coefficient                  | 0.232 $\text{mm}^{-1}$                                     |                             |
| F(000)                                  | 576                                                        |                             |
| Crystal size                            | 0.260 x 0.210 x 0.190 $\text{mm}^3$                        |                             |
| Theta range for data collection         | 1.439 to 25.008 $^\circ$                                   |                             |
| Index ranges                            | $-6 \leq h \leq 7, -16 \leq k \leq 16, -19 \leq l \leq 19$ |                             |
| Reflections collected                   | 6670                                                       |                             |
| Independent reflections                 | 4679 [R(int) = 0.0511]                                     |                             |
| Completeness to theta = 25.008 $^\circ$ | 97.1 %                                                     |                             |
| Refinement method                       | Full-matrix least-squares on $F^2$                         |                             |
| Data / restraints / parameters          | 4679 / 0 / 349                                             |                             |
| Goodness-of-fit on $F^2$                | 1.072                                                      |                             |
| Final R indices [ $I > 2 \sigma(I)$ ]   | R1 = 0.0935, wR2 = 0.2411                                  |                             |
| R indices (all data)                    | R1 = 0.1375, wR2 = 0.2640                                  |                             |
| Extinction coefficient                  | n/a                                                        |                             |
| Largest diff. peak/hole                 | 0.447 and -0.315 $\text{e.\AA}^{-3}$                       |                             |

**Supplementary Table 11.** Atomic coordinates ( $\times 10^4$ ) and equivalent isotropic displacement parameters ( $\text{\AA}^2 \times 10^3$ ) for **5a**.  $U_{\text{eq}}$  is defined as one third of the trace of the orthogonalized  $U_{ij}$  tensor.

| Atom | x        | y        | z       | $U_{\text{eq}}$ |
|------|----------|----------|---------|-----------------|
| C(1) | 2208(13) | -1487(5) | 8812(4) | 62(2)           |
| C(2) | 3863(11) | -609(5)  | 8773(3) | 47(2)           |
| C(3) | 6002(11) | -543(5)  | 9125(4) | 50(2)           |
| C(4) | 7500(11) | 276(5)   | 9099(3) | 48(2)           |
| C(5) | 6895(9)  | 1052(4)  | 8692(3) | 39(1)           |
| C(6) | 4751(10) | 1003(5)  | 8335(4) | 49(2)           |
| C(7) | 3254(10) | 173(4)   | 8359(4) | 46(2)           |
| C(8) | 6140(10) | 3415(4)  | 8636(3) | 42(1)           |
| C(9) | 5814(14) | 3240(5)  | 9517(4) | 69(2)           |



|       |           |          |         |       |
|-------|-----------|----------|---------|-------|
| C(10) | 7919(9)   | 3060(4)  | 7362(3) | 35(1) |
| C(11) | 10053(10) | 3393(4)  | 7120(4) | 46(2) |
| C(12) | 10412(10) | 3546(5)  | 6302(4) | 54(2) |
| C(13) | 8663(10)  | 3365(4)  | 5741(4) | 44(1) |
| C(14) | 6520(10)  | 3014(4)  | 5980(3) | 43(1) |
| C(15) | 6182(10)  | 2855(4)  | 6799(3) | 45(2) |
| C(16) | 12762(13) | 10900(5) | 5588(5) | 77(2) |
| C(17) | 11252(11) | 10185(4) | 6033(4) | 52(2) |
| C(18) | 9335(12)  | 10420(5) | 6416(4) | 58(2) |
| C(19) | 7899(11)  | 9757(4)  | 6803(4) | 51(2) |
| C(20) | 8346(9)   | 8834(4)  | 6836(3) | 40(1) |
| C(21) | 10241(11) | 8583(4)  | 6479(4) | 53(2) |
| C(22) | 11698(11) | 9255(5)  | 6079(4) | 57(2) |
| C(23) | 5859(10)  | 6567(4)  | 6407(3) | 42(1) |
| C(24) | 6153(12)  | 5560(5)  | 6204(4) | 59(2) |
| C(25) | 8441(8)   | 6471(4)  | 7614(3) | 33(1) |
| C(26) | 7886(9)   | 6301(4)  | 8406(3) | 40(1) |
| C(27) | 9168(10)  | 5802(4)  | 8904(3) | 46(2) |
| C(28) | 11125(10) | 5470(4)  | 8621(3) | 40(1) |
| C(29) | 11735(10) | 5665(4)  | 7832(3) | 42(1) |
| C(30) | 10406(9)  | 6167(4)  | 7331(3) | 40(1) |
| N(1)  | 7549(8)   | 2895(3)  | 8226(3) | 38(1) |
| N(2)  | 7006(7)   | 6968(3)  | 7076(3) | 38(1) |
| O(1)  | 5190(7)   | 4015(3)  | 8264(2) | 51(1) |
| O(2)  | 9101(8)   | 3539(4)  | 4941(3) | 66(1) |
| O(3)  | 4678(7)   | 7020(4)  | 5981(2) | 60(1) |
| O(4)  | 12338(8)  | 4954(3)  | 9128(2) | 61(1) |
| S(1)  | 8949(3)   | 2059(1)  | 8690(1) | 50(1) |
| S(2)  | 6417(3)   | 8047(1)  | 7382(1) | 46(1) |

**Supplementary Table 12.** Bond Lengths for **5a**.

| <b>Atom</b> | <b>Atom</b> | <b>Length/Å</b> | <b>Atom</b> | <b>Atom</b> | <b>Length/Å</b> |
|-------------|-------------|-----------------|-------------|-------------|-----------------|
| C1          | C2          | 1.494(9)        | C17         | C22         | 1.385(9)        |
| C2          | C3          | 1.362(9)        | C17         | C18         | 1.390(10)       |
| C2          | C7          | 1.385(8)        | C18         | C19         | 1.366(9)        |
| C3          | C4          | 1.378(9)        | C19         | C20         | 1.373(8)        |
| C4          | C5          | 1.372(8)        | C20         | C21         | 1.366(8)        |
| C5          | C6          | 1.369(8)        | C20         | S2          | 1.769(6)        |
| C5          | S1          | 1.764(6)        | C21         | C22         | 1.391(9)        |

|     |     |          |     |     |          |
|-----|-----|----------|-----|-----|----------|
| C6  | C7  | 1.390(9) | C23 | O3  | 1.213(7) |
| C8  | O1  | 1.231(7) | C23 | N2  | 1.360(7) |
| C8  | N1  | 1.372(7) | C23 | C24 | 1.505(9) |
| C8  | C9  | 1.488(8) | C25 | C26 | 1.372(7) |
| C10 | C15 | 1.362(7) | C25 | C30 | 1.382(8) |
| C10 | C11 | 1.364(8) | C25 | N2  | 1.448(7) |
| C10 | N1  | 1.462(7) | C26 | C27 | 1.356(8) |
| C11 | C12 | 1.384(9) | C27 | C28 | 1.395(8) |
| C12 | C13 | 1.361(8) | C28 | O4  | 1.356(6) |
| C13 | O2  | 1.369(7) | C28 | C29 | 1.380(7) |
| C13 | C14 | 1.373(8) | C29 | C30 | 1.379(8) |
| C14 | C15 | 1.386(8) | N1  | S1  | 1.699(5) |
| C16 | C17 | 1.483(9) | N2  | S2  | 1.697(5) |

**Supplementary Table 13.** Bond Angles for **5a**.

| Atom | Atom | Atom | Angle/°  | Atom | Atom | Atom | Angle/°  |
|------|------|------|----------|------|------|------|----------|
| C3   | C2   | C7   | 117.5(6) | C18  | C19  | C20  | 120.4(6) |
| C3   | C2   | C1   | 122.4(6) | C21  | C20  | C19  | 119.5(6) |
| C7   | C2   | C1   | 120.1(6) | C21  | C20  | S2   | 124.1(5) |
| C2   | C3   | C4   | 122.0(6) | C19  | C20  | S2   | 116.3(5) |
| C5   | C4   | C3   | 120.5(6) | C20  | C21  | C22  | 120.3(6) |
| C6   | C5   | C4   | 118.6(6) | C17  | C22  | C21  | 120.8(6) |
| C6   | C5   | S1   | 124.6(5) | O3   | C23  | N2   | 120.5(6) |
| C4   | C5   | S1   | 116.8(4) | O3   | C23  | C24  | 121.5(5) |
| C5   | C6   | C7   | 120.5(6) | N2   | C23  | C24  | 118.0(5) |
| C2   | C7   | C6   | 120.8(6) | C26  | C25  | C30  | 119.1(5) |
| O1   | C8   | N1   | 119.0(5) | C26  | C25  | N2   | 120.9(5) |
| O1   | C8   | C9   | 121.9(6) | C30  | C25  | N2   | 119.9(5) |
| N1   | C8   | C9   | 119.1(5) | C27  | C26  | C25  | 121.3(5) |
| C15  | C10  | C11  | 119.9(5) | C26  | C27  | C28  | 120.2(5) |
| C15  | C10  | N1   | 120.8(5) | O4   | C28  | C29  | 122.5(5) |
| C11  | C10  | N1   | 119.2(5) | O4   | C28  | C27  | 118.6(5) |
| C10  | C11  | C12  | 119.4(5) | C29  | C28  | C27  | 118.9(5) |
| C13  | C12  | C11  | 120.7(5) | C30  | C29  | C28  | 120.4(5) |
| C12  | C13  | O2   | 118.4(5) | C29  | C30  | C25  | 120.1(5) |
| C12  | C13  | C14  | 120.1(6) | C8   | N1   | C10  | 120.2(5) |
| O2   | C13  | C14  | 121.4(5) | C8   | N1   | S1   | 122.3(4) |
| C13  | C14  | C15  | 118.7(5) | C10  | N1   | S1   | 117.5(3) |
| C10  | C15  | C14  | 121.1(5) | C23  | N2   | C25  | 123.6(5) |
| C22  | C17  | C18  | 117.5(6) | C23  | N2   | S2   | 118.3(4) |

|     |     |     |          |     |    |     |          |
|-----|-----|-----|----------|-----|----|-----|----------|
| C22 | C17 | C16 | 121.1(7) | C25 | N2 | S2  | 117.5(4) |
| C18 | C17 | C16 | 121.4(6) | N1  | S1 | C5  | 103.9(3) |
| C19 | C18 | C17 | 121.5(6) | N2  | S2 | C20 | 103.2(3) |

**Supplementary Table 14.** Anisotropic displacement parameters ( $\text{\AA}^2 \times 10^3$ ) for **5a**.

The anisotropic displacement factor exponent takes the form:  $-2\pi^2 [ h^2 a^{*2} U_{11} + \dots + 2 h k a^* b^* U_{12} ]$

| Atom  | U <sub>11</sub> | U <sub>22</sub> | U <sub>33</sub> | U <sub>23</sub> | U <sub>13</sub> | U <sub>12</sub> |
|-------|-----------------|-----------------|-----------------|-----------------|-----------------|-----------------|
| C(1)  | 68(5)           | 55(4)           | 63(4)           | 3(3)            | 6(3)            | 6(4)            |
| C(2)  | 49(4)           | 53(4)           | 42(3)           | -6(3)           | 6(3)            | 13(3)           |
| C(3)  | 57(4)           | 46(4)           | 52(4)           | 5(3)            | 4(3)            | 25(3)           |
| C(4)  | 43(4)           | 58(4)           | 46(3)           | -3(3)           | -10(3)          | 19(3)           |
| C(5)  | 37(3)           | 38(3)           | 44(3)           | -6(2)           | -2(2)           | 12(3)           |
| C(6)  | 44(4)           | 47(4)           | 60(4)           | 2(3)            | -8(3)           | 23(3)           |
| C(7)  | 38(3)           | 53(4)           | 49(4)           | 1(3)            | -5(3)           | 14(3)           |
| C(8)  | 47(4)           | 38(3)           | 39(3)           | -7(3)           | -11(3)          | 9(3)            |
| C(9)  | 105(6)          | 64(5)           | 45(4)           | -5(3)           | -9(4)           | 37(5)           |
| C(10) | 33(3)           | 34(3)           | 40(3)           | -6(2)           | -8(2)           | 9(3)            |
| C(11) | 31(3)           | 52(4)           | 55(4)           | -6(3)           | -9(3)           | 3(3)            |
| C(12) | 22(3)           | 69(5)           | 69(4)           | -3(3)           | -4(3)           | -4(3)           |
| C(13) | 39(3)           | 47(4)           | 46(3)           | -1(3)           | 2(3)            | 7(3)            |
| C(14) | 38(3)           | 41(4)           | 47(3)           | -4(3)           | -9(3)           | -2(3)           |
| C(15) | 28(3)           | 57(4)           | 47(3)           | -2(3)           | -6(2)           | -7(3)           |
| C(16) | 69(5)           | 55(5)           | 100(6)          | 3(4)            | -13(4)          | -12(4)          |
| C(17) | 48(4)           | 38(4)           | 67(4)           | 1(3)            | -18(3)          | -5(3)           |
| C(18) | 66(5)           | 34(4)           | 73(5)           | -1(3)           | -13(4)          | 14(4)           |
| C(19) | 53(4)           | 34(4)           | 68(4)           | -9(3)           | -7(3)           | 16(3)           |
| C(20) | 34(3)           | 43(4)           | 45(3)           | -3(3)           | -8(2)           | 13(3)           |
| C(21) | 51(4)           | 34(4)           | 78(5)           | 6(3)            | 8(3)            | 15(3)           |
| C(22) | 41(4)           | 57(5)           | 72(4)           | -3(3)           | 5(3)            | 3(3)            |
| C(23) | 34(3)           | 49(4)           | 40(3)           | -1(3)           | -1(3)           | 0(3)            |
| C(24) | 62(4)           | 56(5)           | 56(4)           | -9(3)           | 1(3)            | -6(4)           |
| C(25) | 23(3)           | 36(3)           | 39(3)           | 1(2)            | -1(2)           | 0(2)            |
| C(26) | 29(3)           | 51(4)           | 42(3)           | -3(3)           | 1(2)            | 12(3)           |
| C(27) | 49(4)           | 55(4)           | 37(3)           | 4(3)            | 7(3)            | 13(3)           |
| C(28) | 40(3)           | 40(3)           | 42(3)           | 3(3)            | 0(3)            | 12(3)           |
| C(29) | 40(3)           | 44(4)           | 44(3)           | 5(3)            | 11(3)           | 14(3)           |
| C(30) | 36(3)           | 45(4)           | 41(3)           | 4(3)            | 7(2)            | 8(3)            |
| N(1)  | 37(3)           | 39(3)           | 42(3)           | -6(2)           | -8(2)           | 15(2)           |

|      |       |       |       |       |        |       |
|------|-------|-------|-------|-------|--------|-------|
| N(2) | 32(2) | 42(3) | 42(3) | -2(2) | 0(2)   | 7(2)  |
| O(1) | 57(3) | 49(3) | 49(2) | -3(2) | -6(2)  | 22(2) |
| O(2) | 57(3) | 93(4) | 47(3) | 6(2)  | 10(2)  | 0(3)  |
| O(3) | 52(3) | 81(3) | 48(3) | 8(2)  | -13(2) | 14(3) |
| O(4) | 74(3) | 74(3) | 43(2) | 7(2)  | -2(2)  | 41(3) |
| S(1) | 42(1) | 48(1) | 63(1) | 3(1)  | -18(1) | 17(1) |
| S(2) | 44(1) | 46(1) | 53(1) | 1(1)  | 9(1)   | 19(1) |

**Supplementary Table 15.** Hydrogen coordinates ( $\text{\AA} \times 10^4$ ) and isotropic displacement parameters ( $\text{\AA}^2 \times 10^3$ ) for **5a**.

| <b>Atom</b> | <b>x</b> | <b>y</b> | <b>z</b> | <b>U(eq)</b> |
|-------------|----------|----------|----------|--------------|
| H(1A)       | 2980     | -2027    | 8704     | 93           |
| H(1B)       | 990      | -1458    | 8414     | 93           |
| H(1C)       | 1591     | -1541    | 9344     | 93           |
| H(3)        | 6465     | -1066    | 9391     | 60           |
| H(4A)       | 8932     | 303      | 9359     | 58           |
| H(6)        | 4292     | 1530     | 8075     | 59           |
| H(7)        | 1827     | 141      | 8095     | 56           |
| H(9A)       | 7238     | 3410     | 9813     | 104          |
| H(9B)       | 5304     | 2583     | 9598     | 104          |
| H(9C)       | 4691     | 3614     | 9707     | 104          |
| H(11)       | 11256    | 3517     | 7501     | 56           |
| H(12)       | 11863    | 3774     | 6135     | 65           |
| H(14)       | 5318     | 2887     | 5599     | 52           |
| H(15)       | 4746     | 2604     | 6966     | 54           |
| H(16A)      | 12071    | 11475    | 5549     | 115          |
| H(16B)      | 12977    | 10667    | 5052     | 115          |
| H(16C)      | 14215    | 11020    | 5874     | 115          |
| H(18)       | 9023     | 11044    | 6409     | 69           |
| H(19)       | 6612     | 9931     | 7046     | 62           |
| H(21)       | 10557    | 7960     | 6503     | 64           |
| H(22)       | 12988    | 9077     | 5839     | 68           |
| H(24A)      | 4822     | 5272     | 5904     | 89           |
| H(24B)      | 6348     | 5217     | 6697     | 89           |
| H(24C)      | 7475     | 5549     | 5882     | 89           |
| H(26)       | 6606     | 6532     | 8606     | 48           |
| H(27)       | 8741     | 5682     | 9435     | 55           |
| H(29)       | 13050    | 5457     | 7638     | 50           |

|       |       |      |      |    |
|-------|-------|------|------|----|
| H(30) | 10834 | 6300 | 6802 | 48 |
| H(2)  | 8011  | 3304 | 4655 | 99 |
| H(4)  | 13185 | 4667 | 8864 | 91 |

## Supplementary Figures

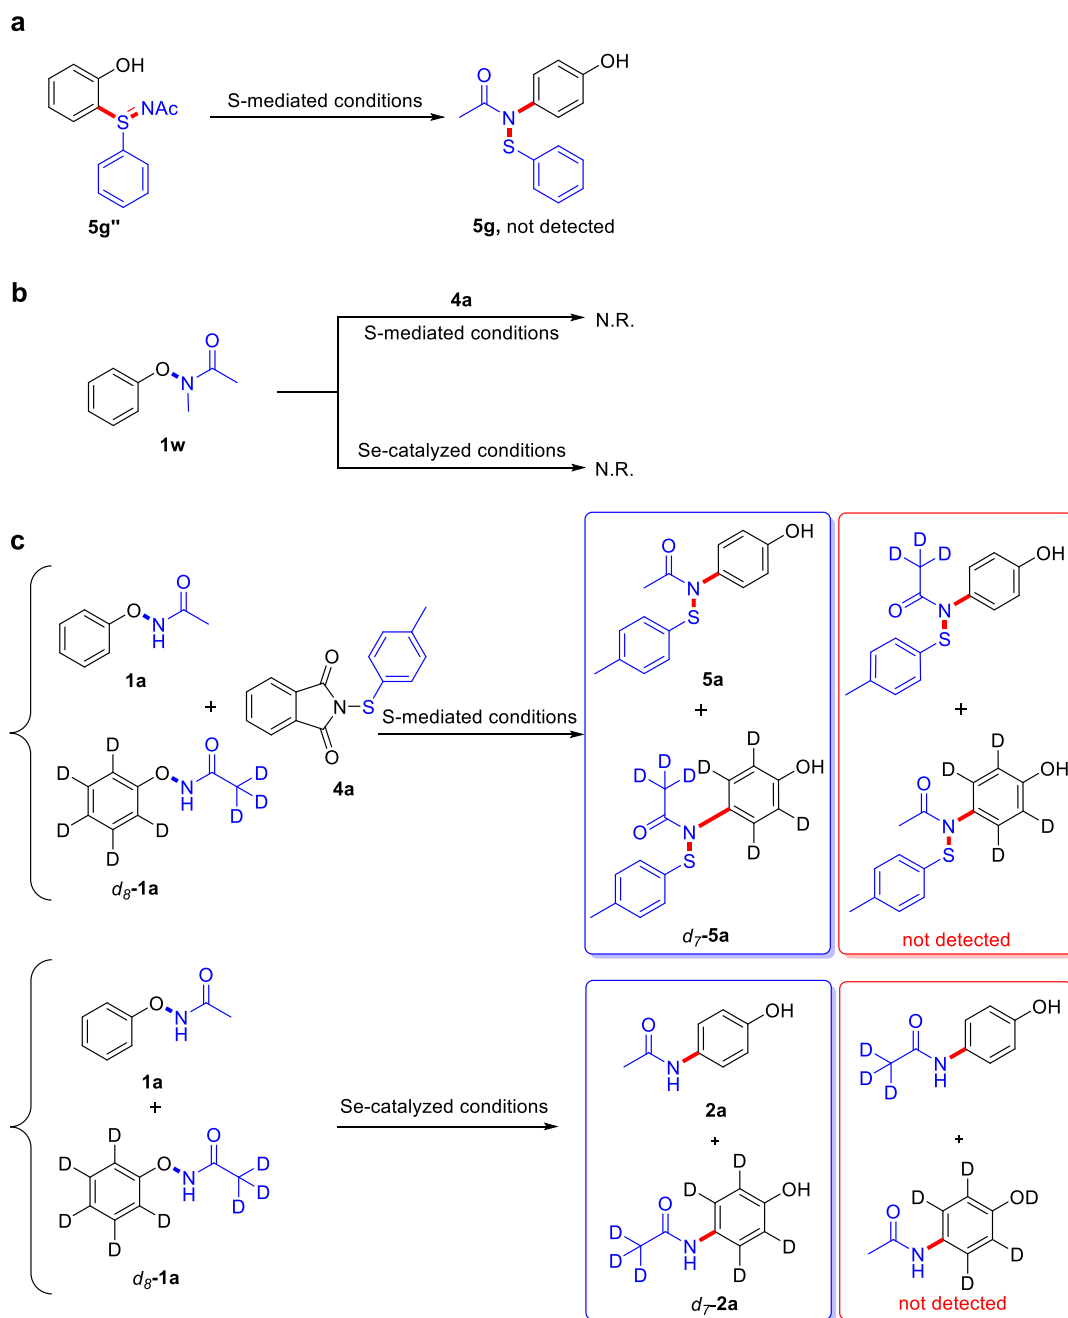

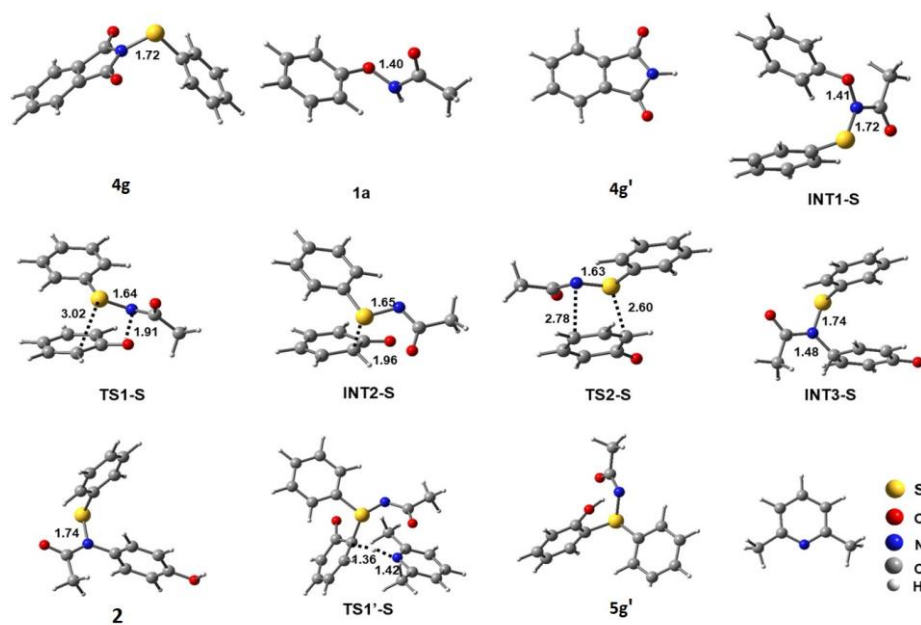

**Supplementary Figure 2.** Optimized structures of all stationary points involved in S-mediated reaction in TFE. All bond lengths are in Å.

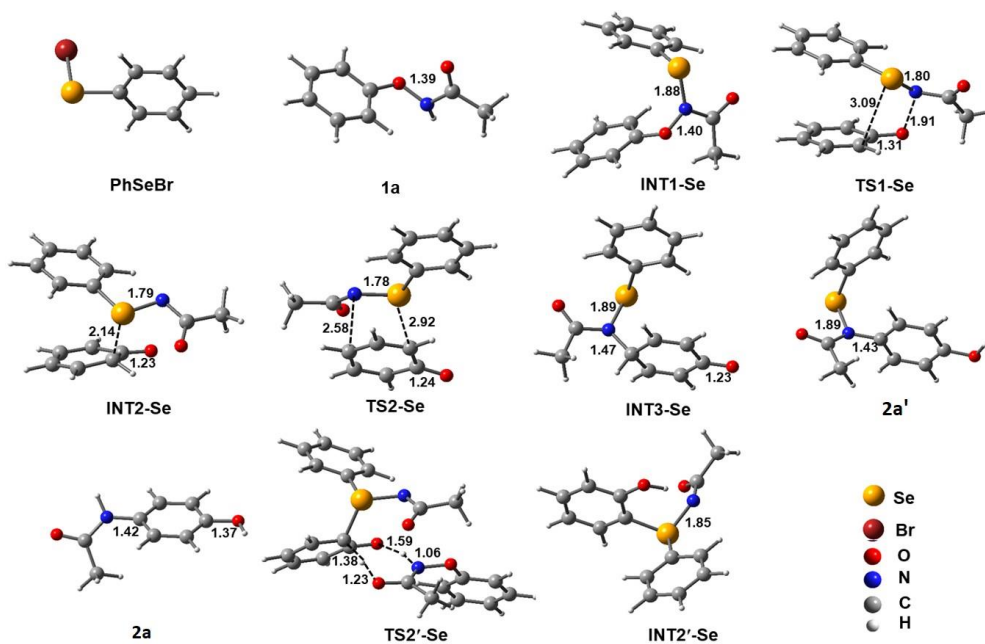

**Supplementary Figure 3.** Optimized structures of all stationary points for the reaction between the *N*-phenoxyacetamide **1a** and PhSeBr in the solvent (1,4-dioxane). All bond lengths are in Å.

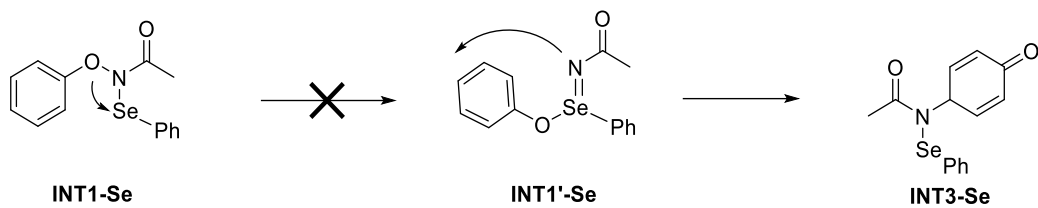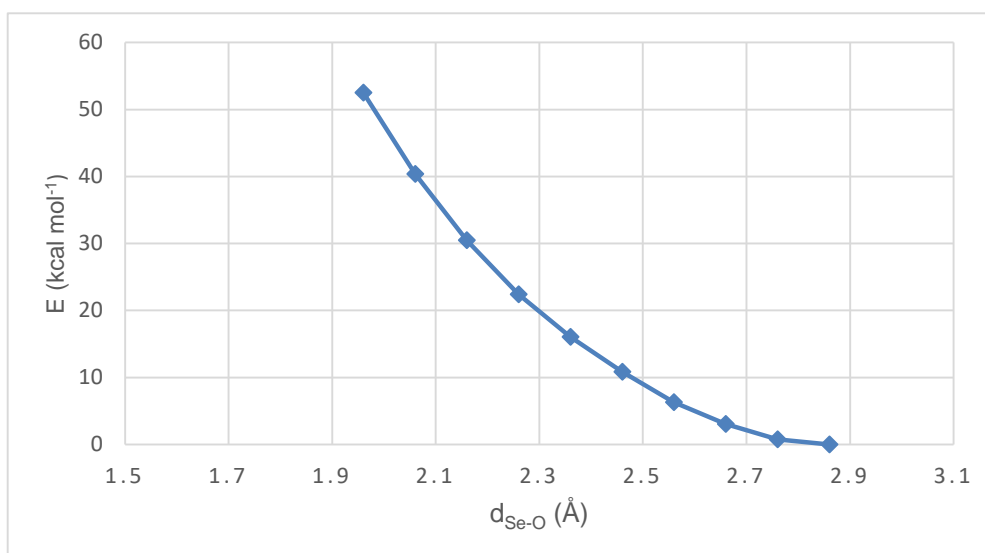

**Supplementary Figure 4.** Relaxed potential energy surface scan for the [1,2]-migration of PhO to the Se center at the B3LYP-D3 level (the mixed basis set is used: LANL2DZdp for Se, and 6-31g(d,p) for other atoms).

Attempts to locate a transition state for the [1,2]-migration of PhO to the Se center to generate the O–Se–N intermediate failed. As shown in Supplementary Figure 4, a relax scan of the migration of PhO group to the Se atom indicates that the energy increases monotonously as the Se–O(Ph) distance decreases from 2.86 Å. This result implies that the intermediate **INT1'-Se** can't be generated through this pathway.

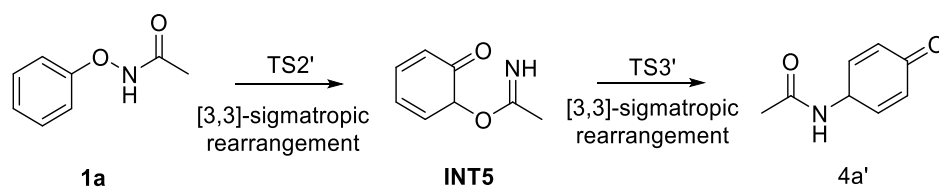



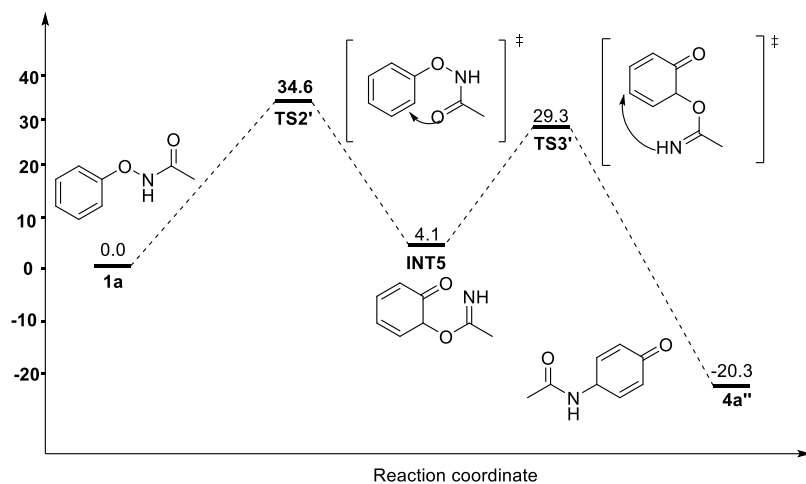

**Supplementary Figure 5.** Calculated Gibbs energy (in kcal mol<sup>-1</sup>) profile for the generation of the *p*-amination phenol via a [3,3]-sigmatropic rearrangement pathway.

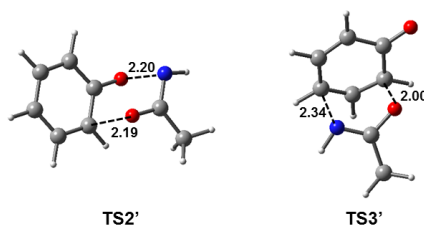

**Supplementary Figure 6.** Transition state for [3,3]-sigmatropic rearrangement pathway.

The possibility for the formation of **2a'** from **1a** via [3,3]-sigmatropic rearrangement is also calculated. As shown in Figure 5, the rate-determining-step for the generation of **2a'** is **TS2'** (with a barrier of 34.6 kcal/mol), which is about 17.5 kcal/mol higher than **TS2**, leading to the same **2a'**. The high activation energy of **TS2'** indicated that this pathway is unfavorable.

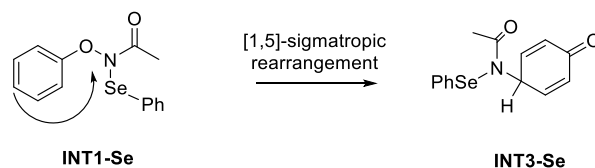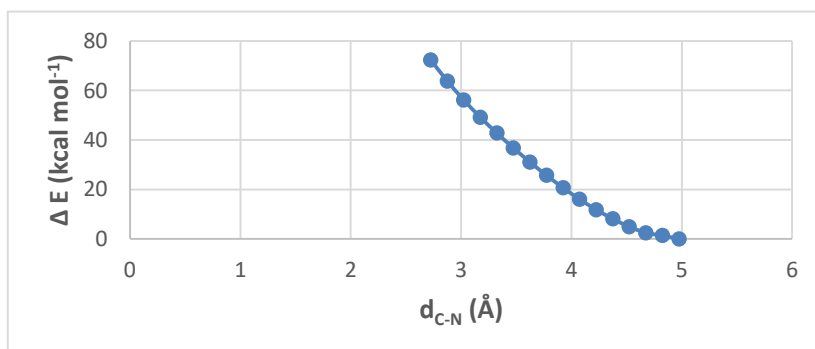

**Supplementary Figure 7.** Relaxed potential energy surface scan for the generation of the *p*-amination phenol via [1,5]-migration of **INT1-Se** at the B3LYP-D3 level (the mixed basis set is used: LANL2DZdp for Se, and 6-31g(d,p) for other atoms).

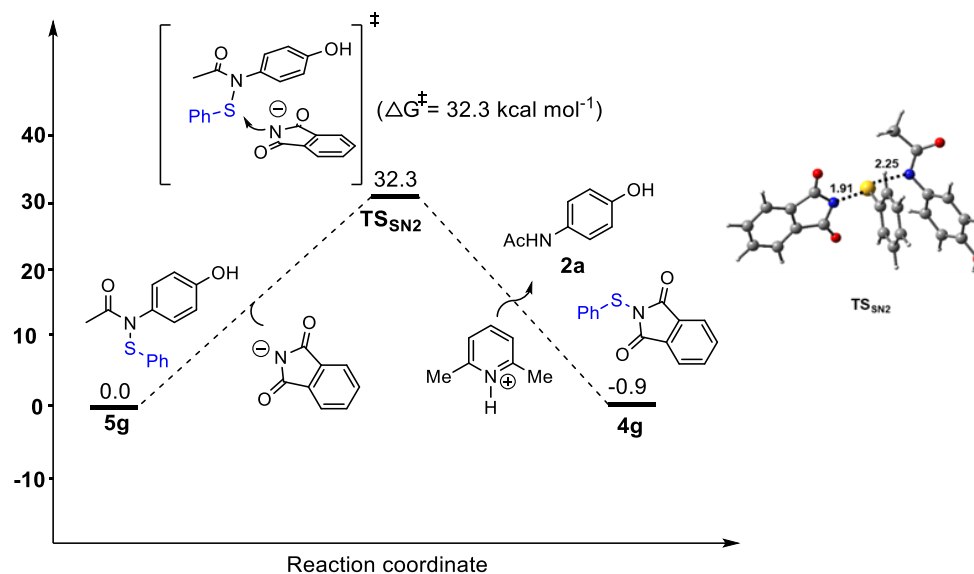

**Supplementary Figure 8.** Computed Gibbs energy (in kcal mol<sup>-1</sup>) profile for the regeneration of **2g** from **3g** mediated by 2,6-lutidine in the solvent (TFE). All distances are given in Å.

The nucleophilic substitution by the phthalimide anion to **5g** may regenerate the *N*-phenylthiophthalimide **4g**, as shown in Supplementary Figure 8. However, the corresponding barrier of this process is up to 32.3 kcal mol<sup>-1</sup>, and the regeneration of **4g** is slightly exothermic by 0.9 kcal mol<sup>-1</sup>, suggesting the turnover of **4g** is difficult even under basic condition. Therefore, for S-mediated reaction, a stoichiometric amount of *N*-phenylthiophthalimide is required.

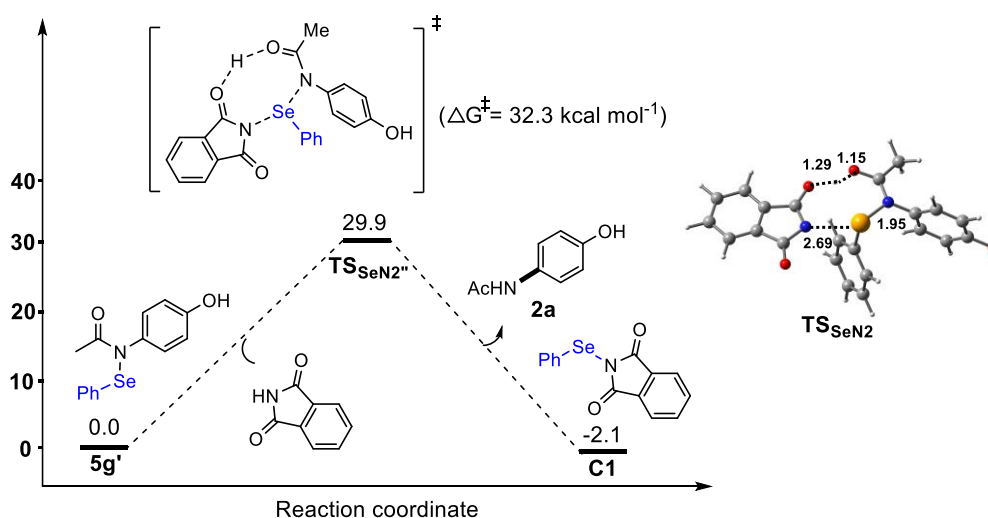

**Supplementary Figure 9.** Computed Gibbs energy (in kcal mol<sup>-1</sup>) profile for the regeneration of **C1** from **5g'** in the solvent (TFE). All distances are given in Å.

The nucleophilic substitution by the phthalimide to **5g'** may regenerate the *N*-phenylthiophthalimide, as shown in Supplementary Figure 9. However, the corresponding barrier of this process is 29.9 kcal mol<sup>-1</sup>, and the regeneration of *N*-phenylselanylphthalimide (**C1**) is exothermic by 2.1 kcal mol<sup>-1</sup>, suggesting the turnover of *N*-phenylselanylphthalimide (**C1**) is feasible under neutral condition. Therefore, *N*-phenylselanylphthalimide might be a possible catalyst for the *para*-selective nitrogen migration of *N*-aryloxyacetamides, which has a lower regeneration barrier.

Attempts to locate a transition state for the generation of the *p*-amination phenol via [1,5]-migration of **INT1-Se** failed. As shown in Supplementary Figure 9, a relax scan of the migration of N(SePh)Ac group to the *para*-position of **INT1-Se** indicates that the energy increases monotonously as the C–N distance decreases from 4.97 to 2.72 Å. This result implies that the intermediate **INT3-Se** can't be generated through this pathway.

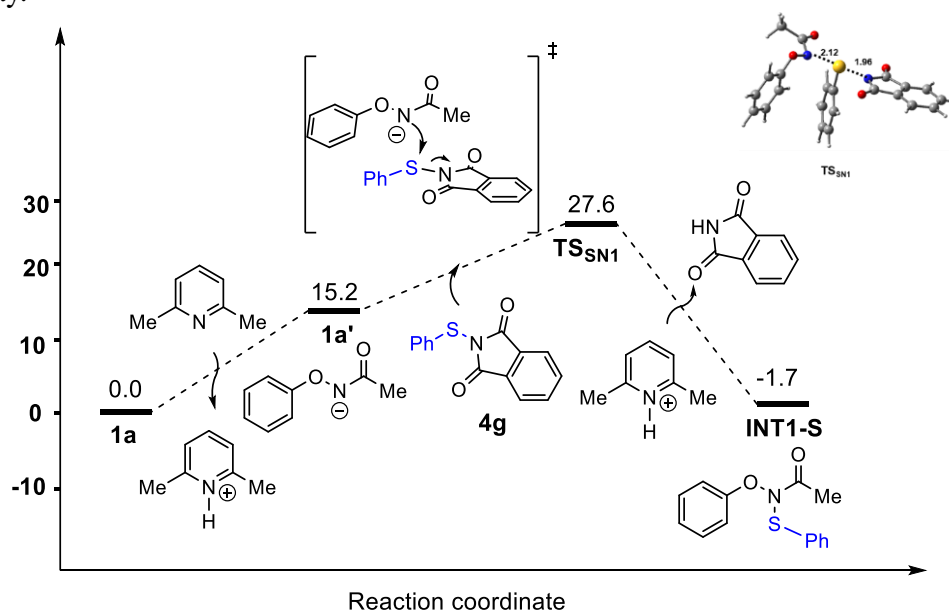

**Supplementary Figure 10.** Computed Gibbs energy (in kcal mol<sup>-1</sup>) profile for the reaction between **1a** and **4g** to generate the reactive intermediate **INT1-S** mediated by 2,6-lutidine in TFE. All distances are given in Å.

For S-mediated reaction, the mechanistic details for the generation of **INT1-S** is investigated, the calculated free energy is shown in Supplementary Figure 10. First, the deprotonation of **1a** by 2,6-lutidine generates a nitrogen anionic species **1a'**. Then, the nucleophilic attack of **1a'** to *N*-phenylthiophthalimide **4g** via **TS<sub>SN1</sub>** generates **INT1-S**. This process is exothermic by 1.7 kcal mol<sup>-1</sup>, which a barrier of 27.6 kcal mol<sup>-1</sup>. This result suggests that the formation of **INT1-S** using phenoxyacetamide (**1a**) and *N*-phenylthiophthalimide (**4g**) in the present of 2,6-lutidine is possible.

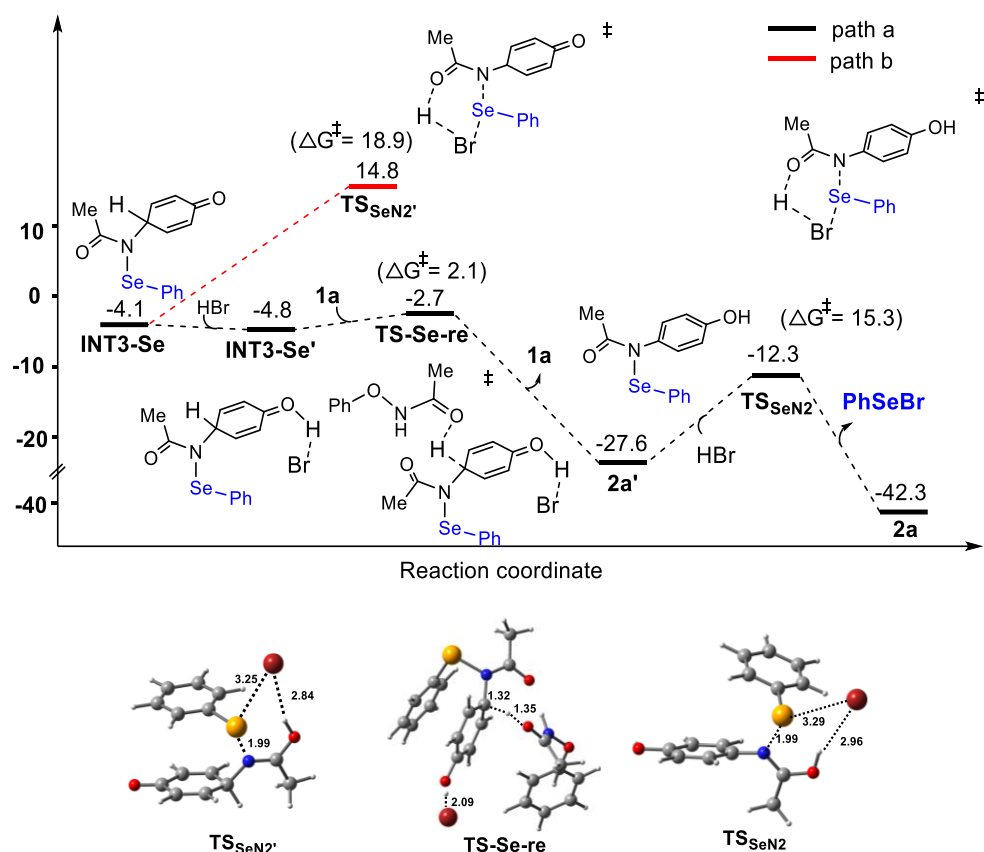

**Supplementary Figure 11.** Calculated Gibbs energy (in kcal mol<sup>-1</sup>) profile for the regeneration of catalyst PhSeBr.

For Se-catalyzed reaction, the free energy profile for the regeneration of catalyst PhSeBr from **2a'** is also investigated. As shown in Fig. 11, the rearomatization of **INT3-Se** with the assistance of HBr and **1a** generates the intermediate **2a'** via transition state **TS-Se-re**, the activation barrier of this process is only 2.1 kcal mol<sup>-1</sup> (**path-a**). Then, in the protonolysis of **2a'** to regenerate the catalyst PhSeBr, the corresponding barrier is only 15.3 kcal mol<sup>-1</sup>. The regeneration of PhSeBr is strongly exothermic by 14.7 kcal mol<sup>-1</sup>, suggesting the turnover of PhSeBr is feasible. This calculation is consistent with our experimental results. While the regeneration of PhSeBr *via* the direct protonolysis of **INT3-Se** (**TS<sub>SeN2'</sub>**) is possible (**path-b**), the activation barrier of this pathway (18.9 kcal mol<sup>-1</sup>) is higher than that of **path-a** (15.3 kcal mol<sup>-1</sup>). Thus, our data suggest the aromatization step precedes the Se–N bond protonolysis.

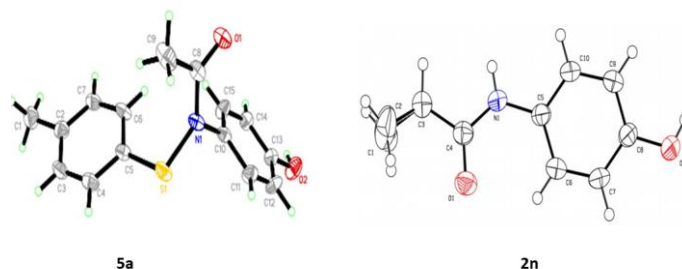

**Supplementary Figure 12.** X-ray diffraction structures of compound **2n** (CCDC-1549814) and **5a** (CCDC-1570955).

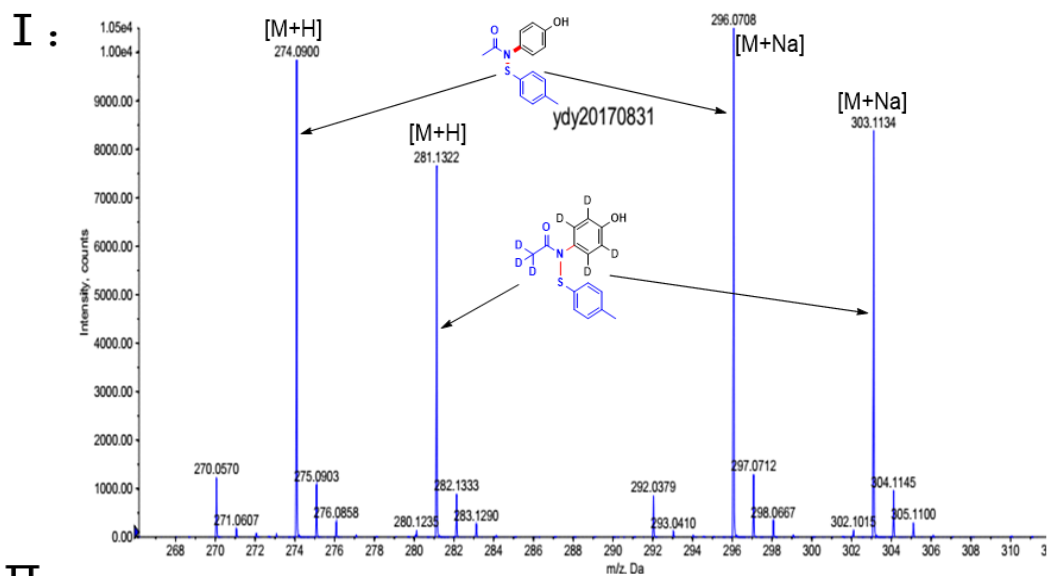

II :

-TOF MS: 2.280 to 2.314 min from Sample 3 (170306) of 170306.wiff  
 a=3.60124119137538070e-004, t0=1.47719988924618520e+001 (Turbo Spray), subtracted (1.747 to

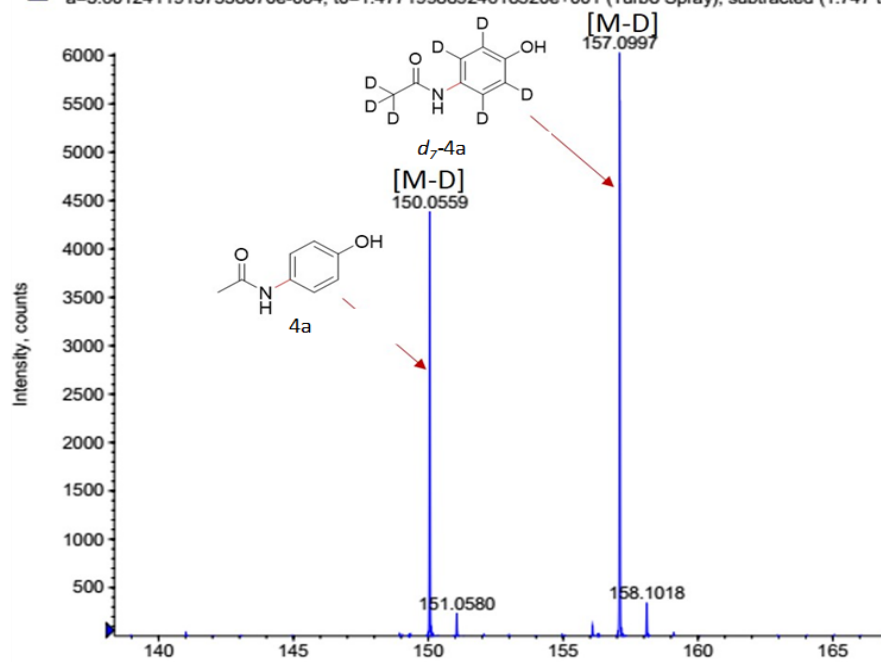

Supplementary Figure 13. Crossover experiment of S/Se-mediated reactions detected by HRMS.

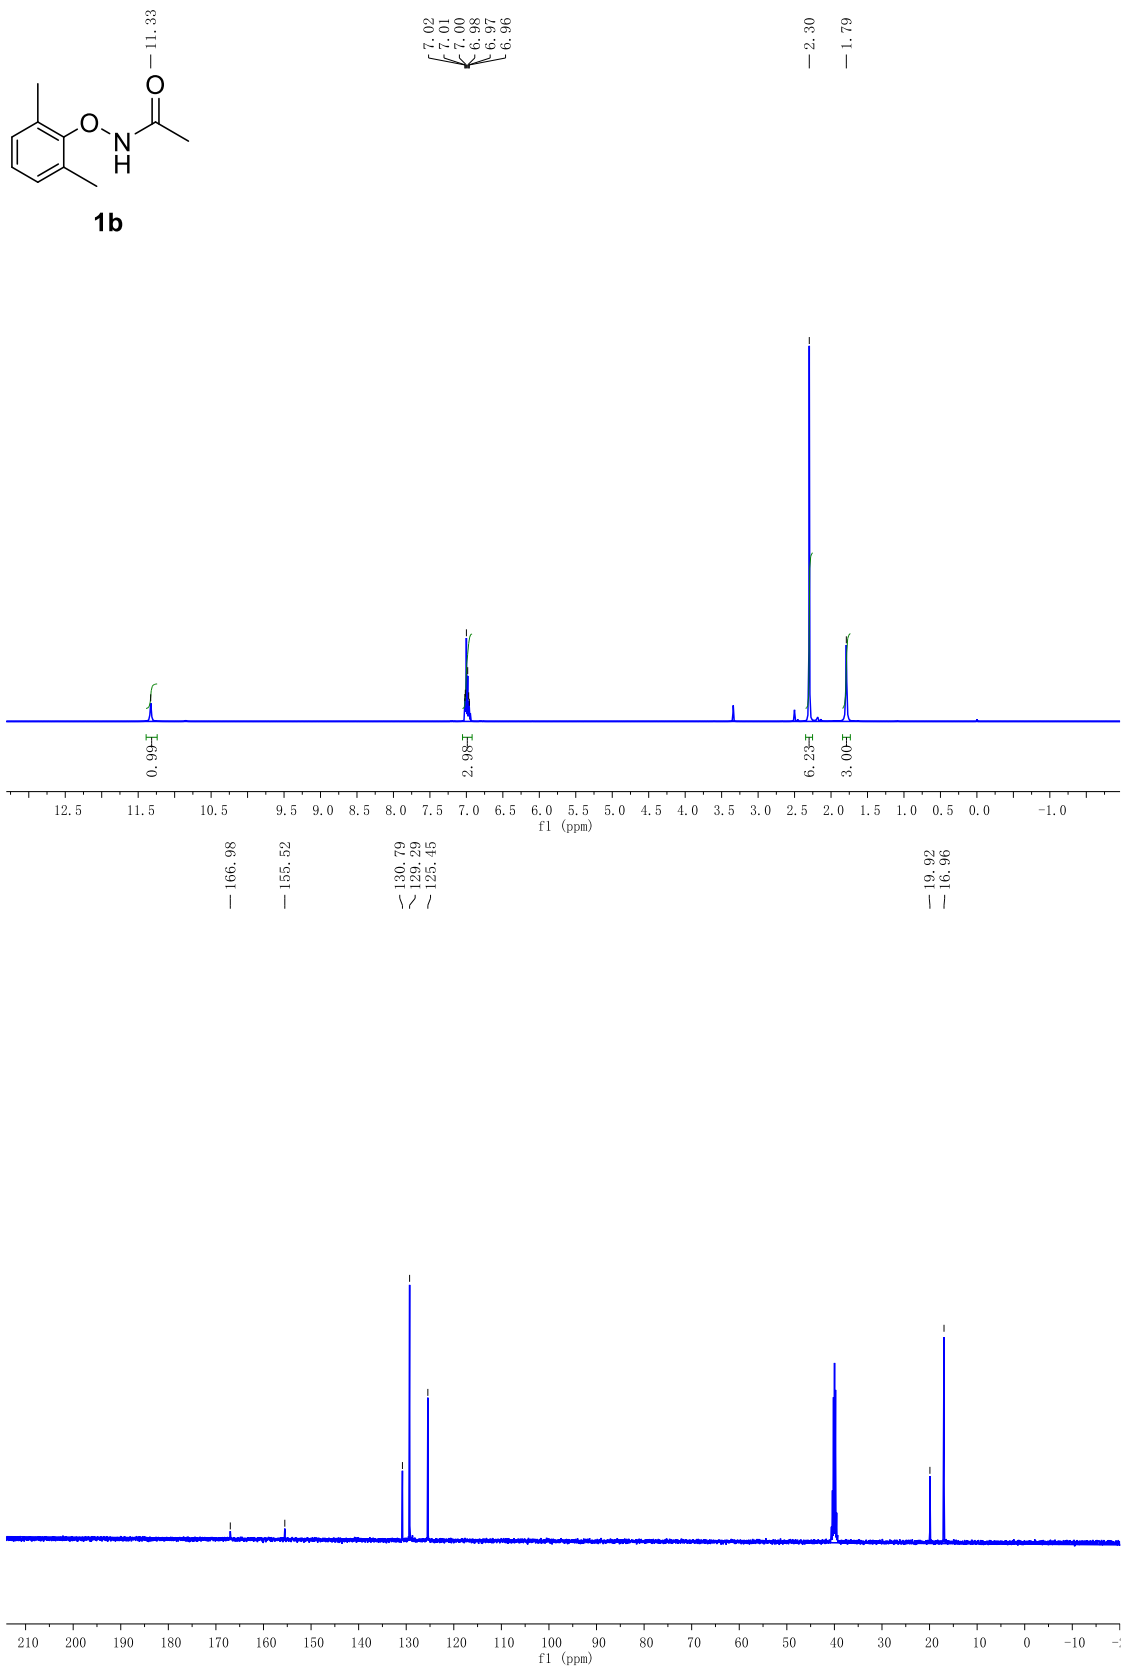

**Supplementary Figure 14.** <sup>1</sup>H and <sup>13</sup>C NMR spectra for compound **1b**

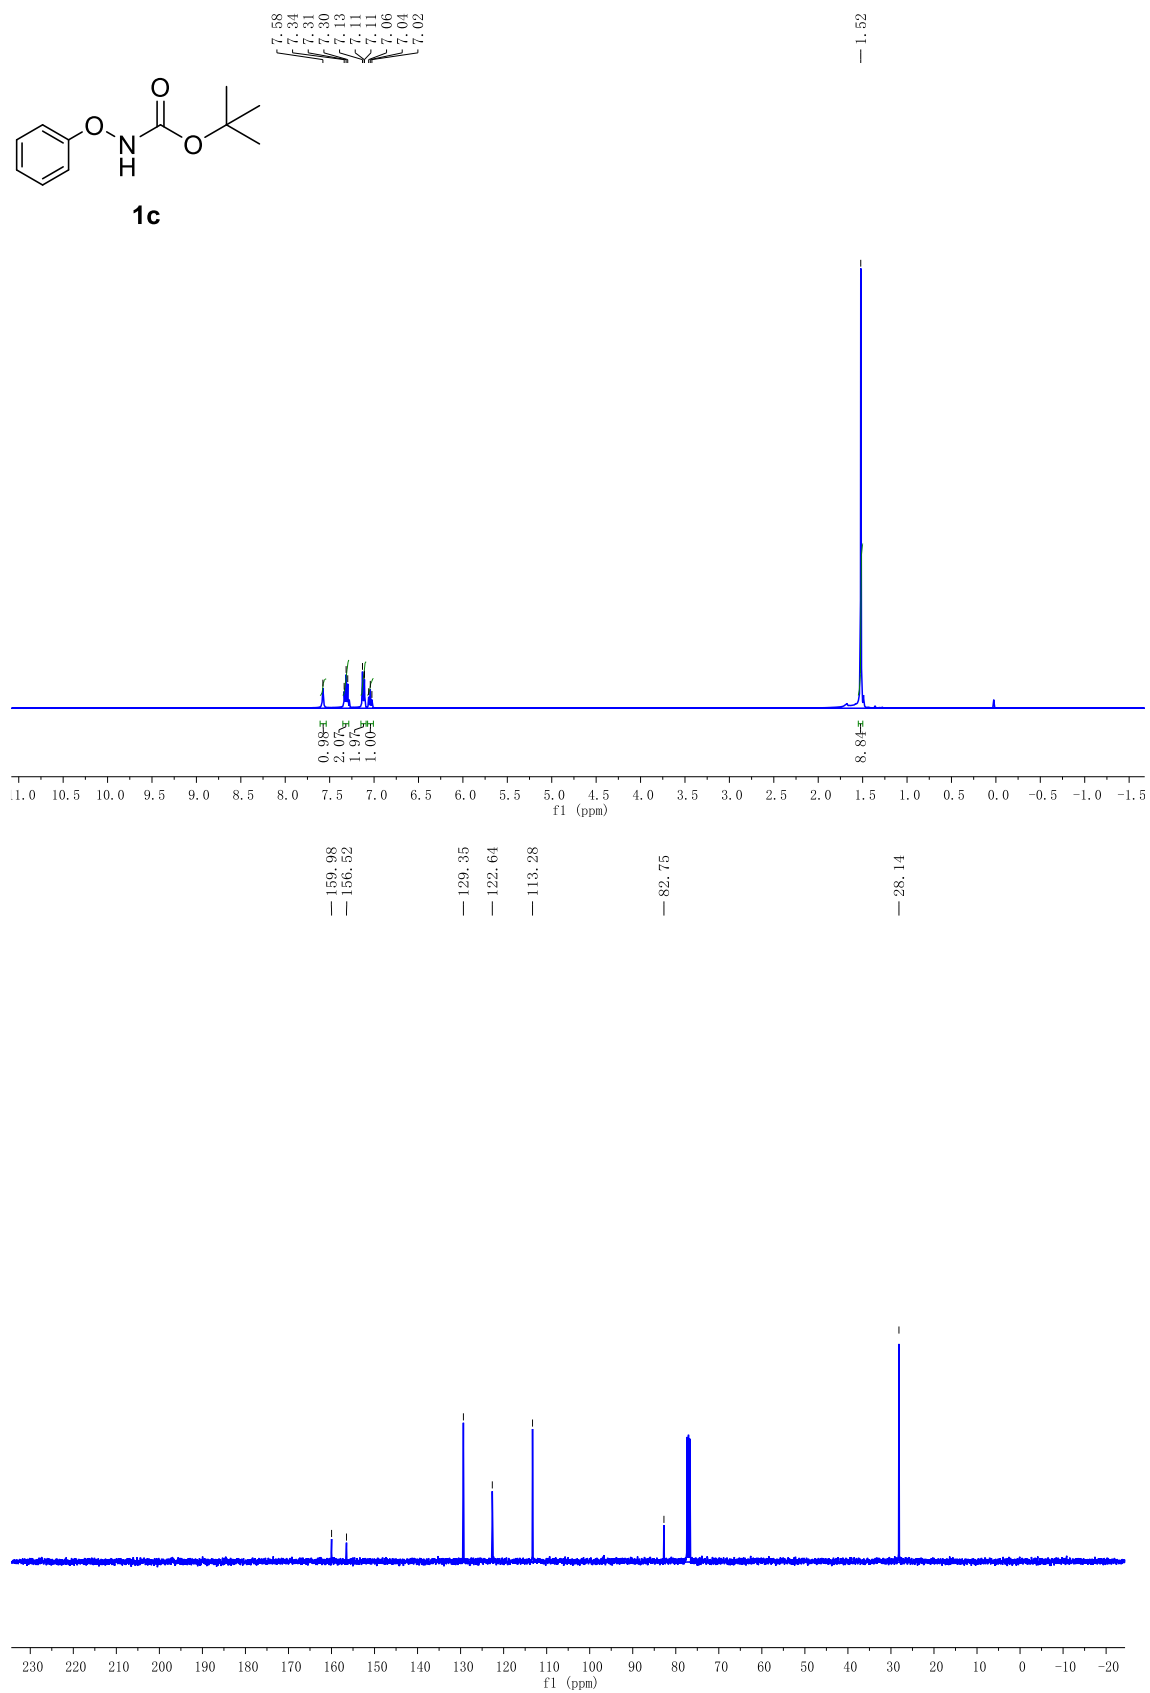

Supplementary Figure 15. <sup>1</sup>H and <sup>13</sup>C NMR spectra for compound **1c**

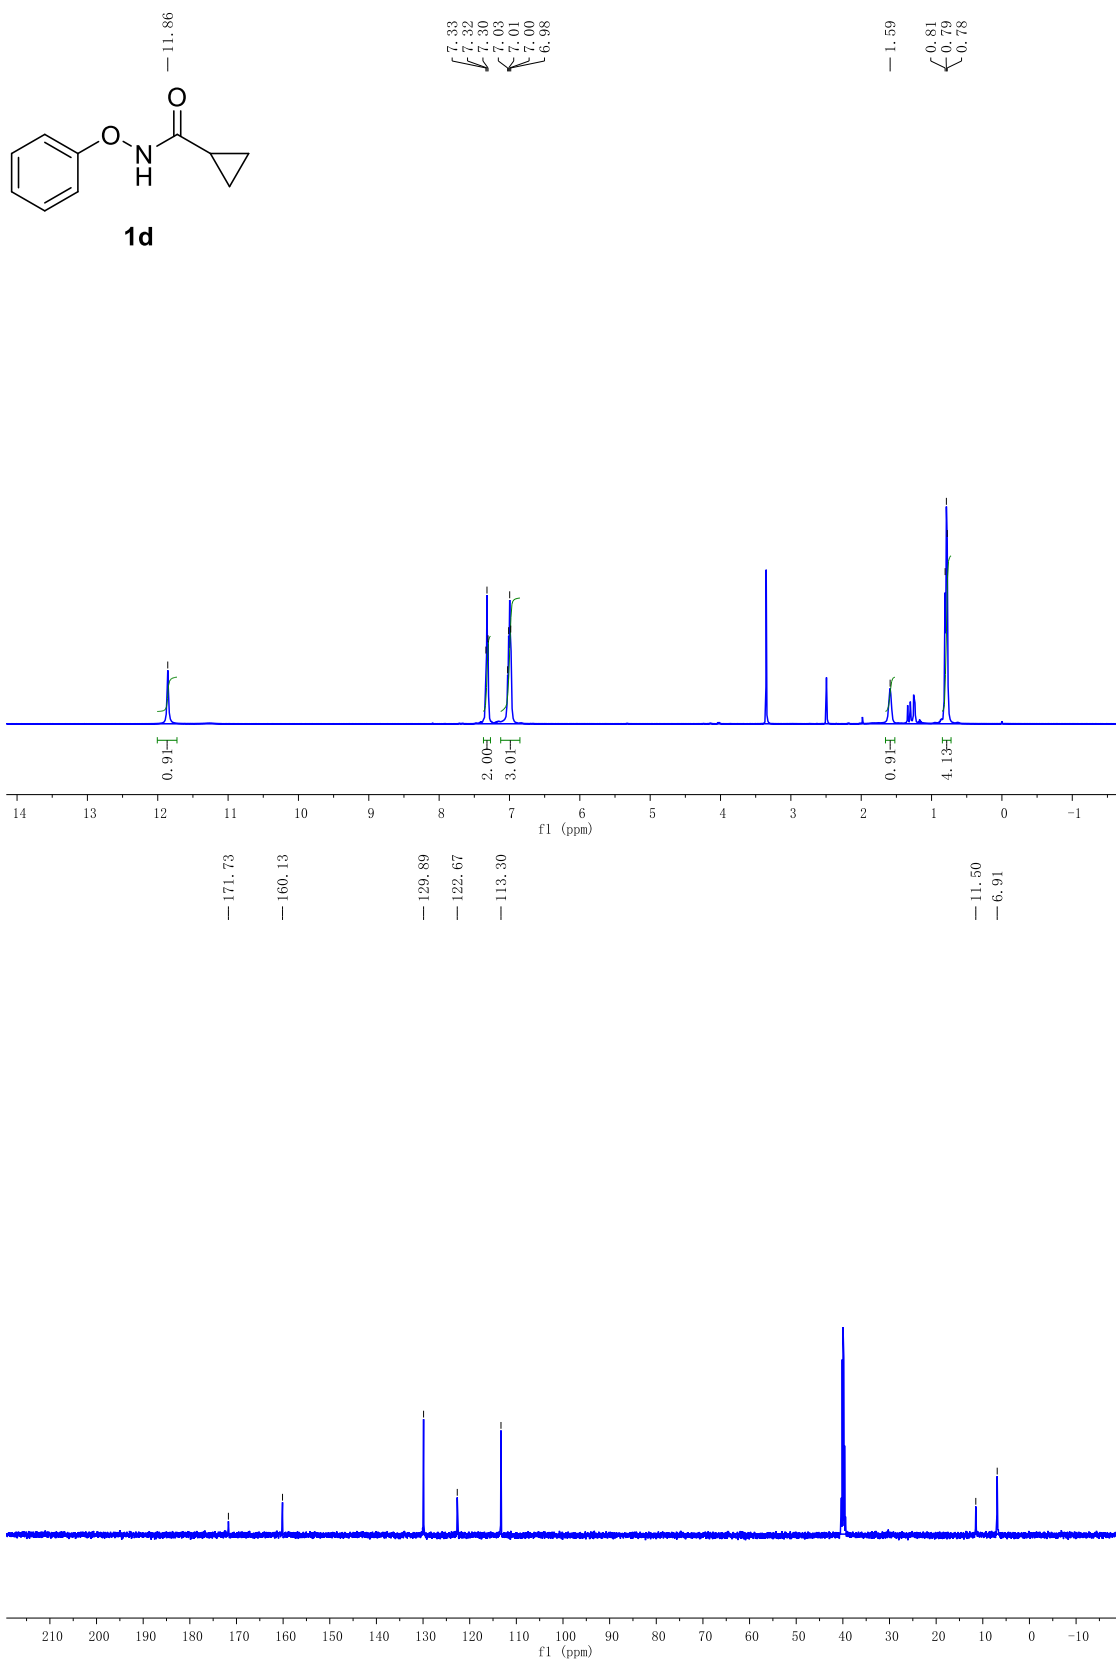

**Supplementary Figure 16.** <sup>1</sup>H and <sup>13</sup>C NMR spectra for compound **1d**



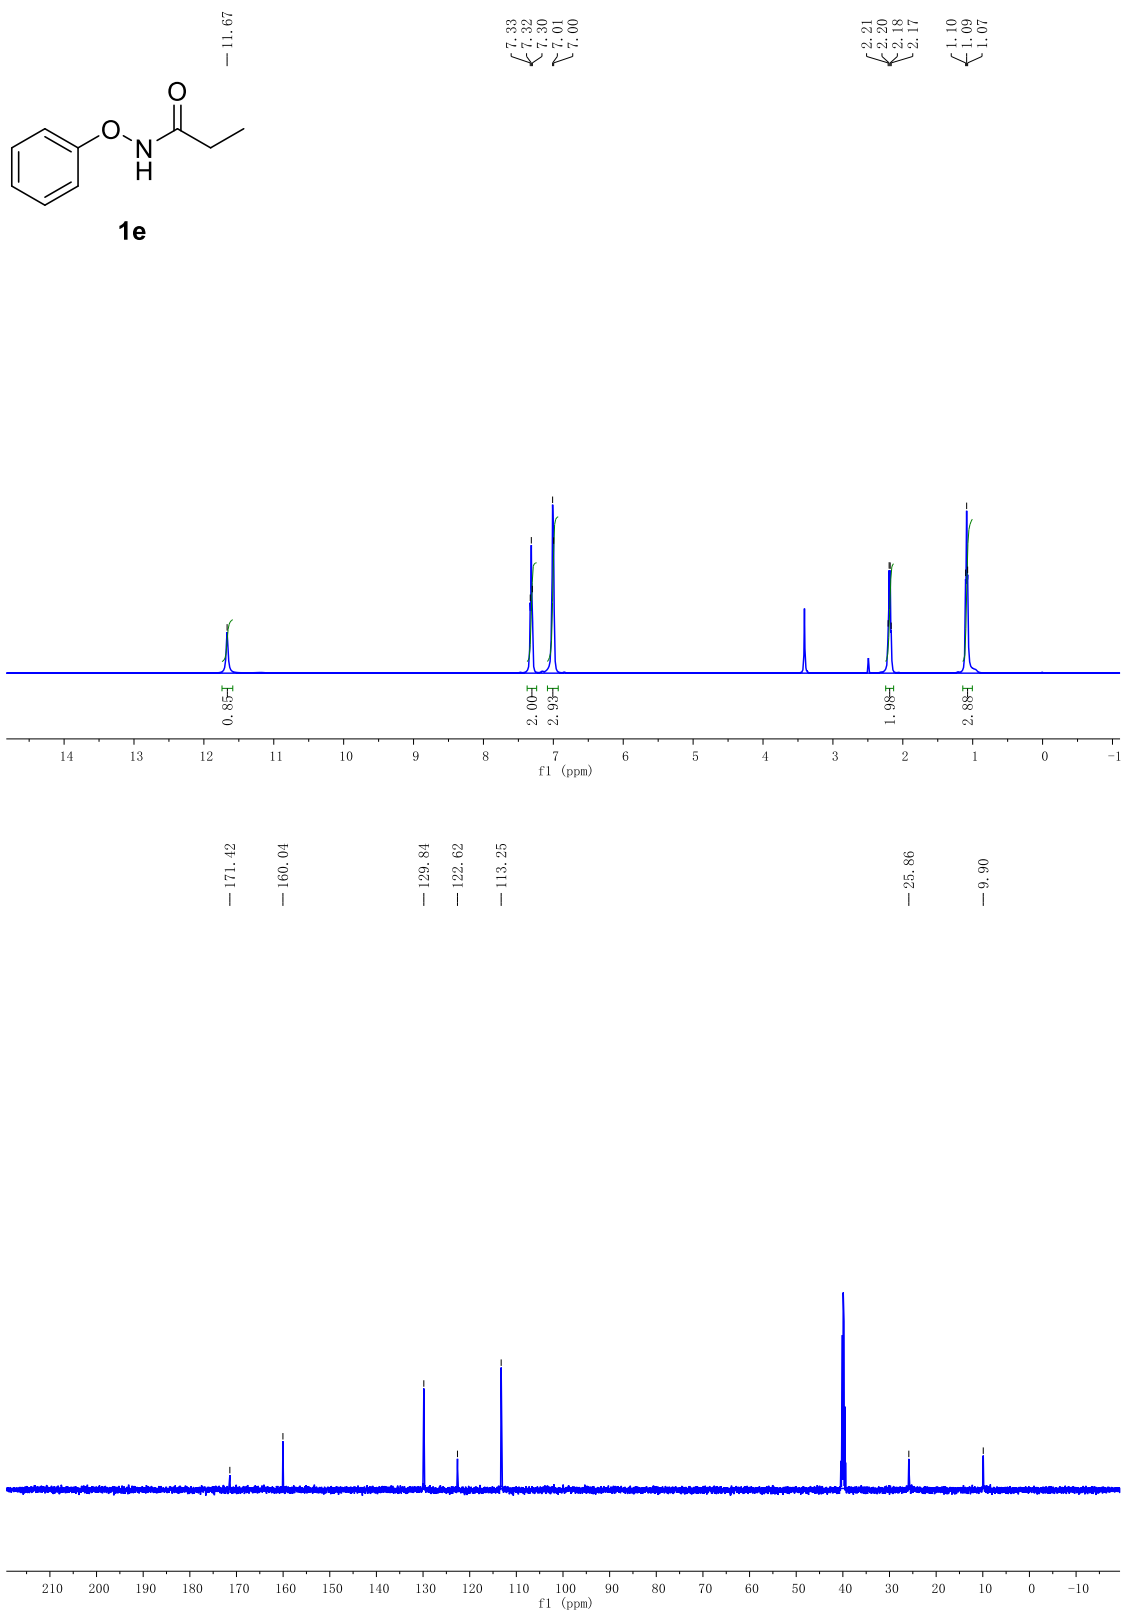

**Supplementary Figure 17.** <sup>1</sup>H and <sup>13</sup>C NMR spectra for compound **1e**

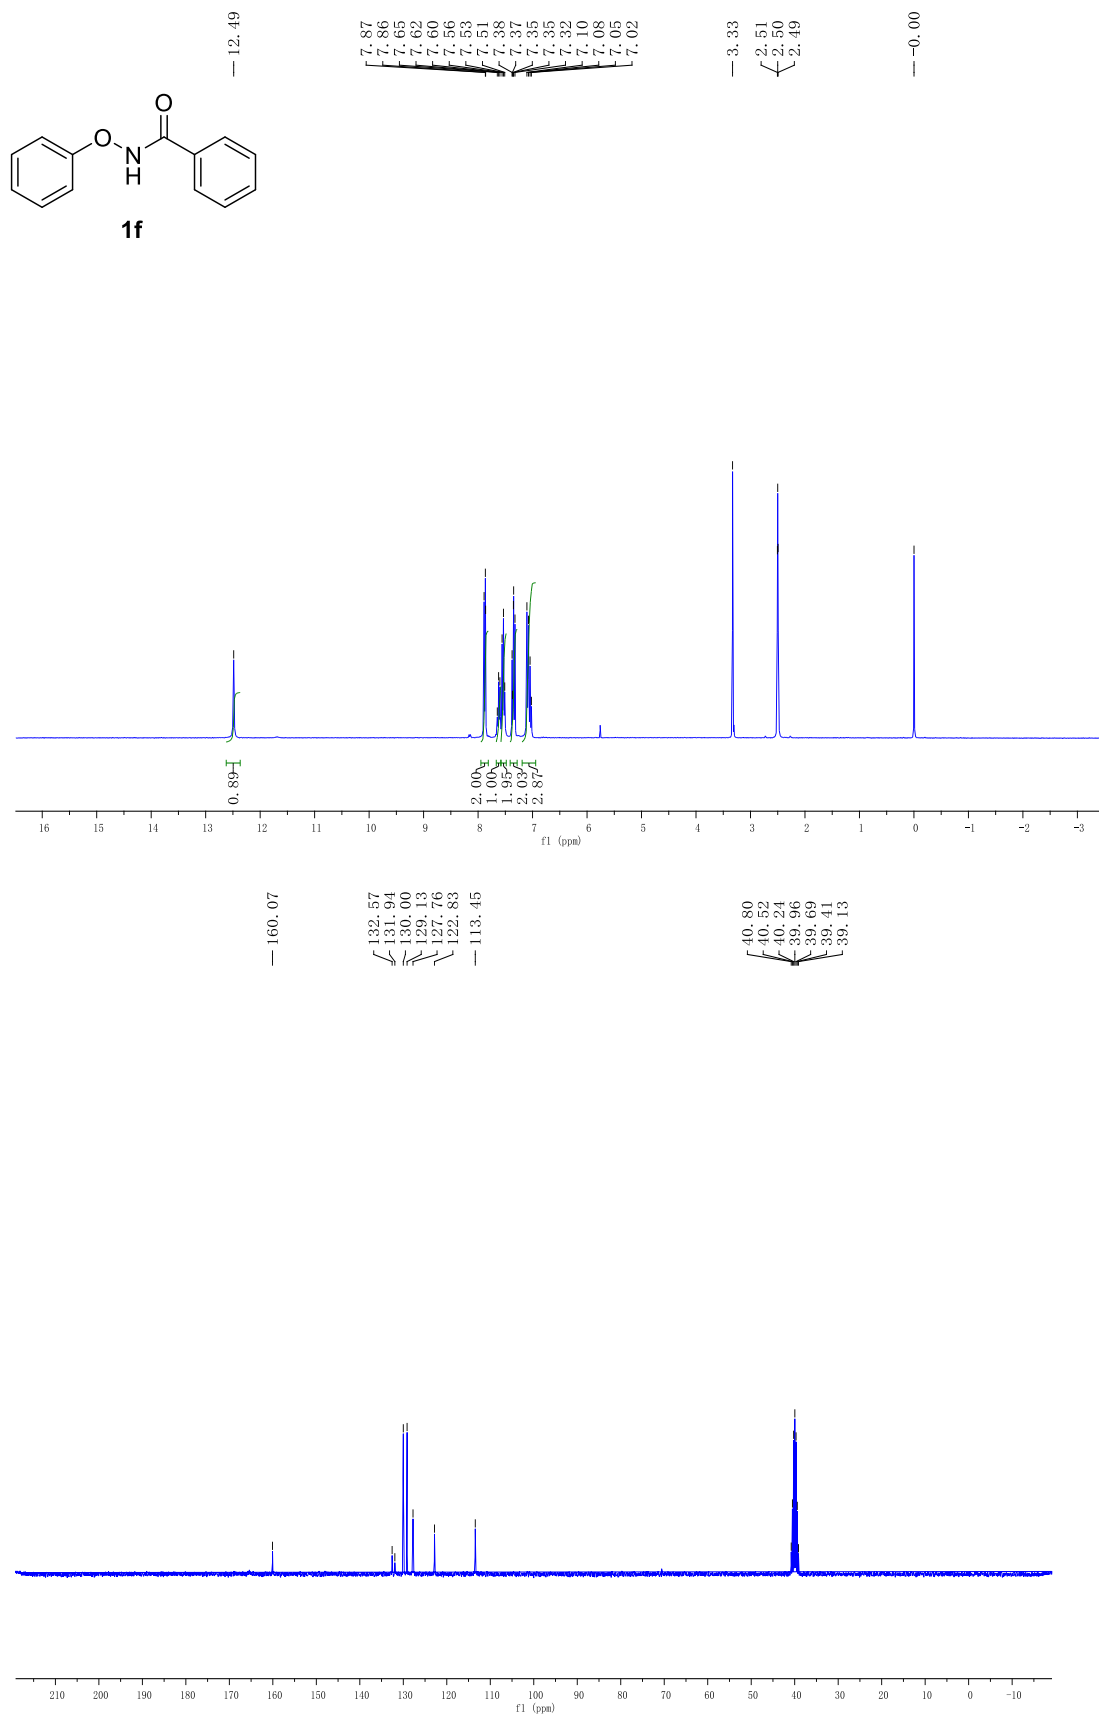

**Supplementary Figure 18.** <sup>1</sup>H and <sup>13</sup>C NMR spectra for compound **1f**

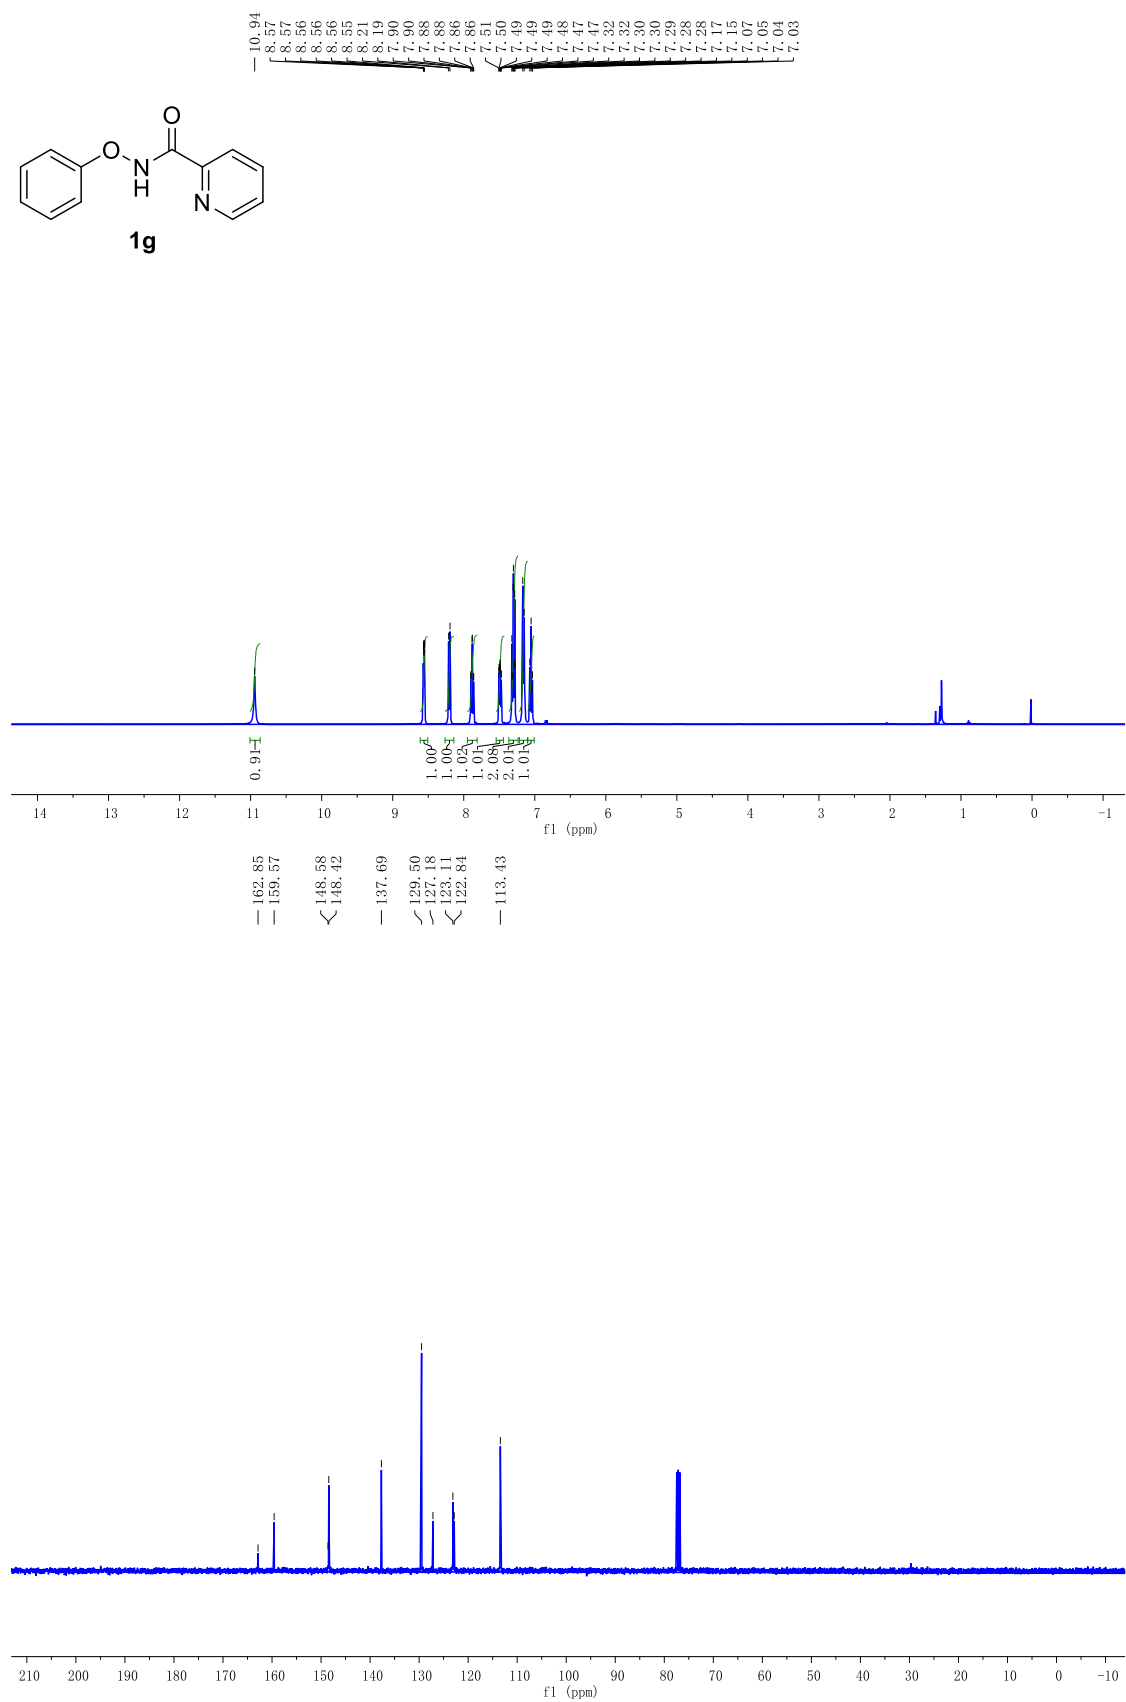

Supplementary Figure 19. <sup>1</sup>H and <sup>13</sup>C NMR spectra for compound **1g**

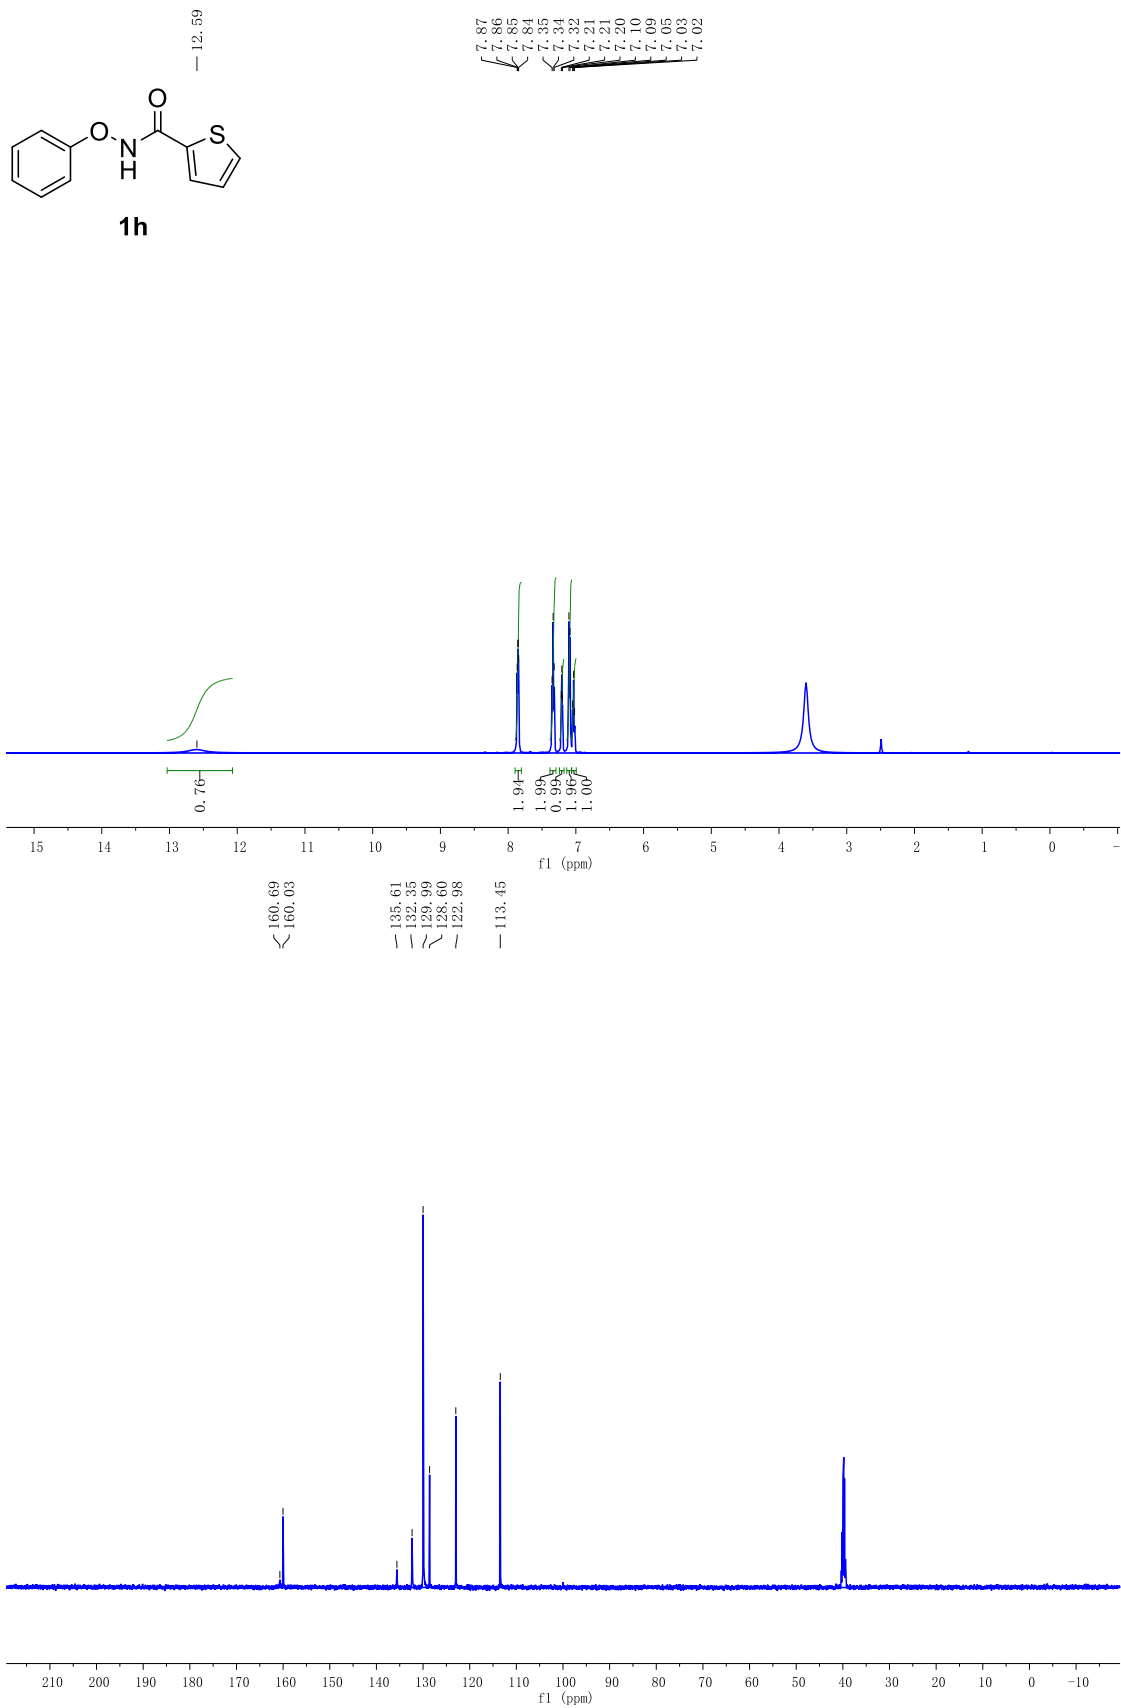

**Supplementary Figure 20.** <sup>1</sup>H and <sup>13</sup>C NMR spectra for compound **1h**

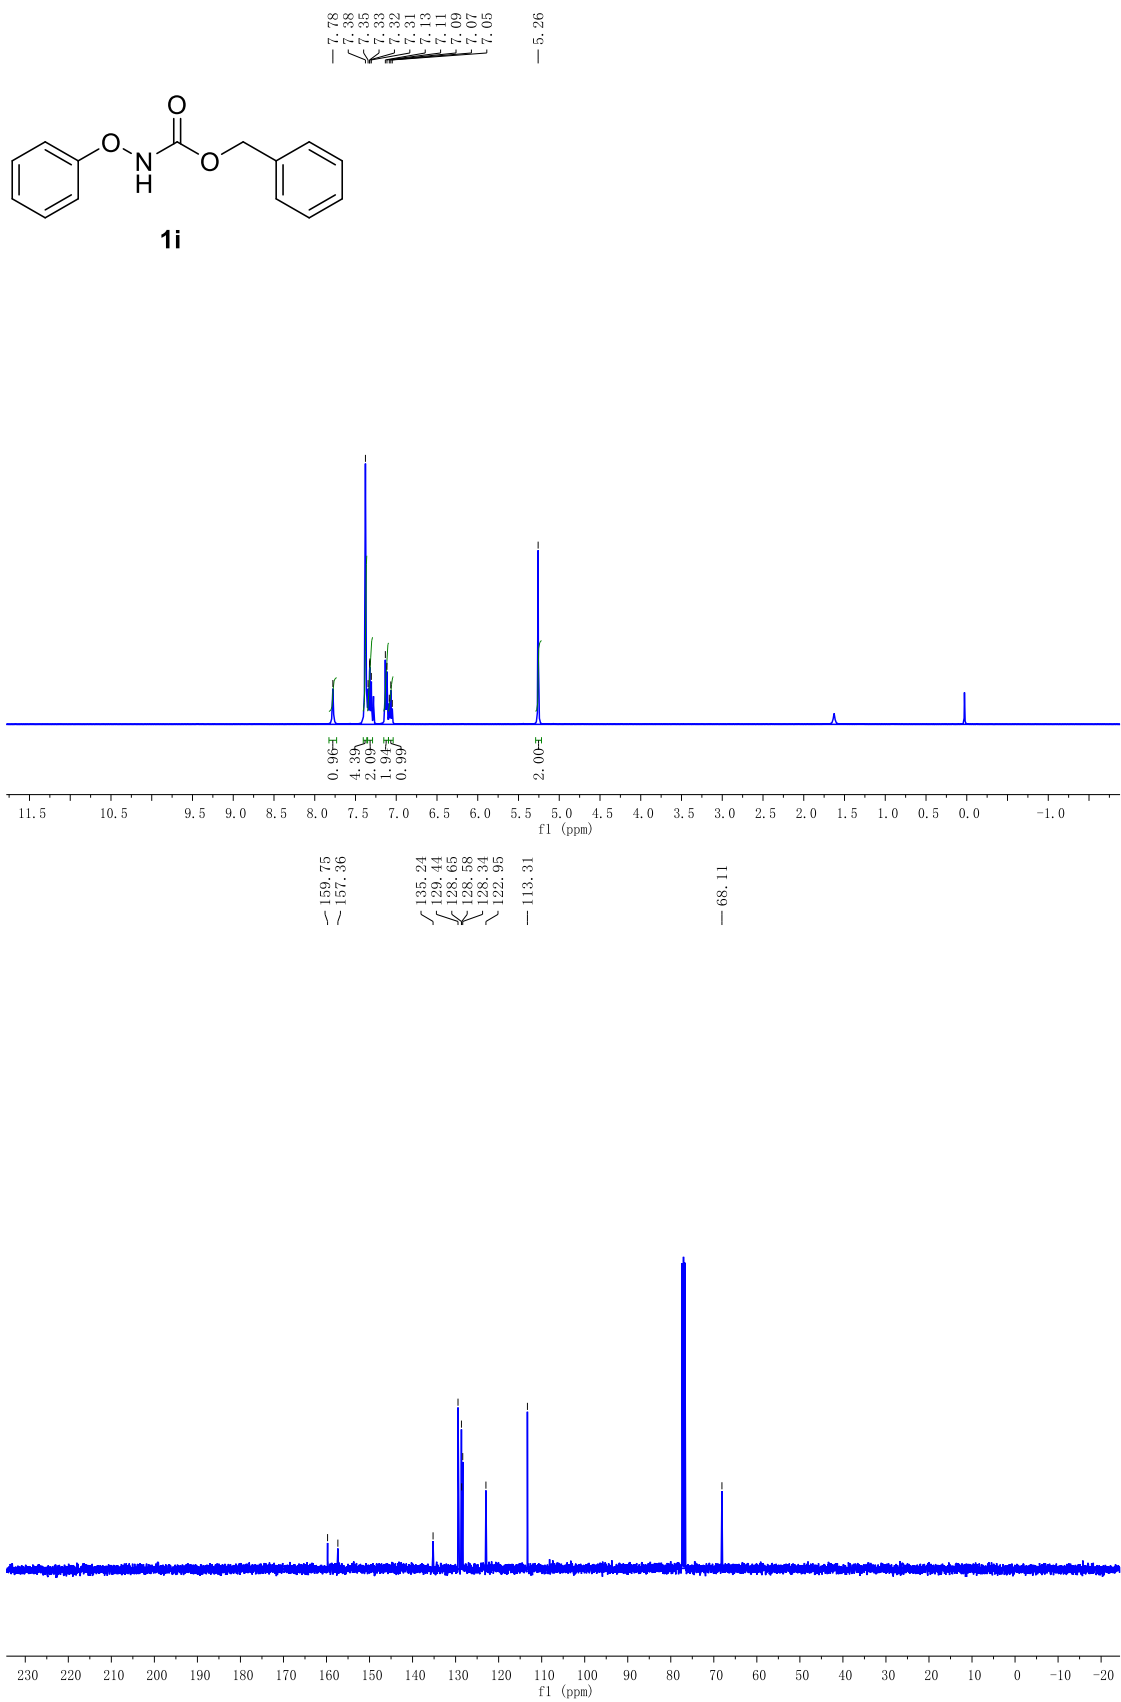

**Supplementary Figure 21.** <sup>1</sup>H and <sup>13</sup>C NMR spectra for compound **1i**

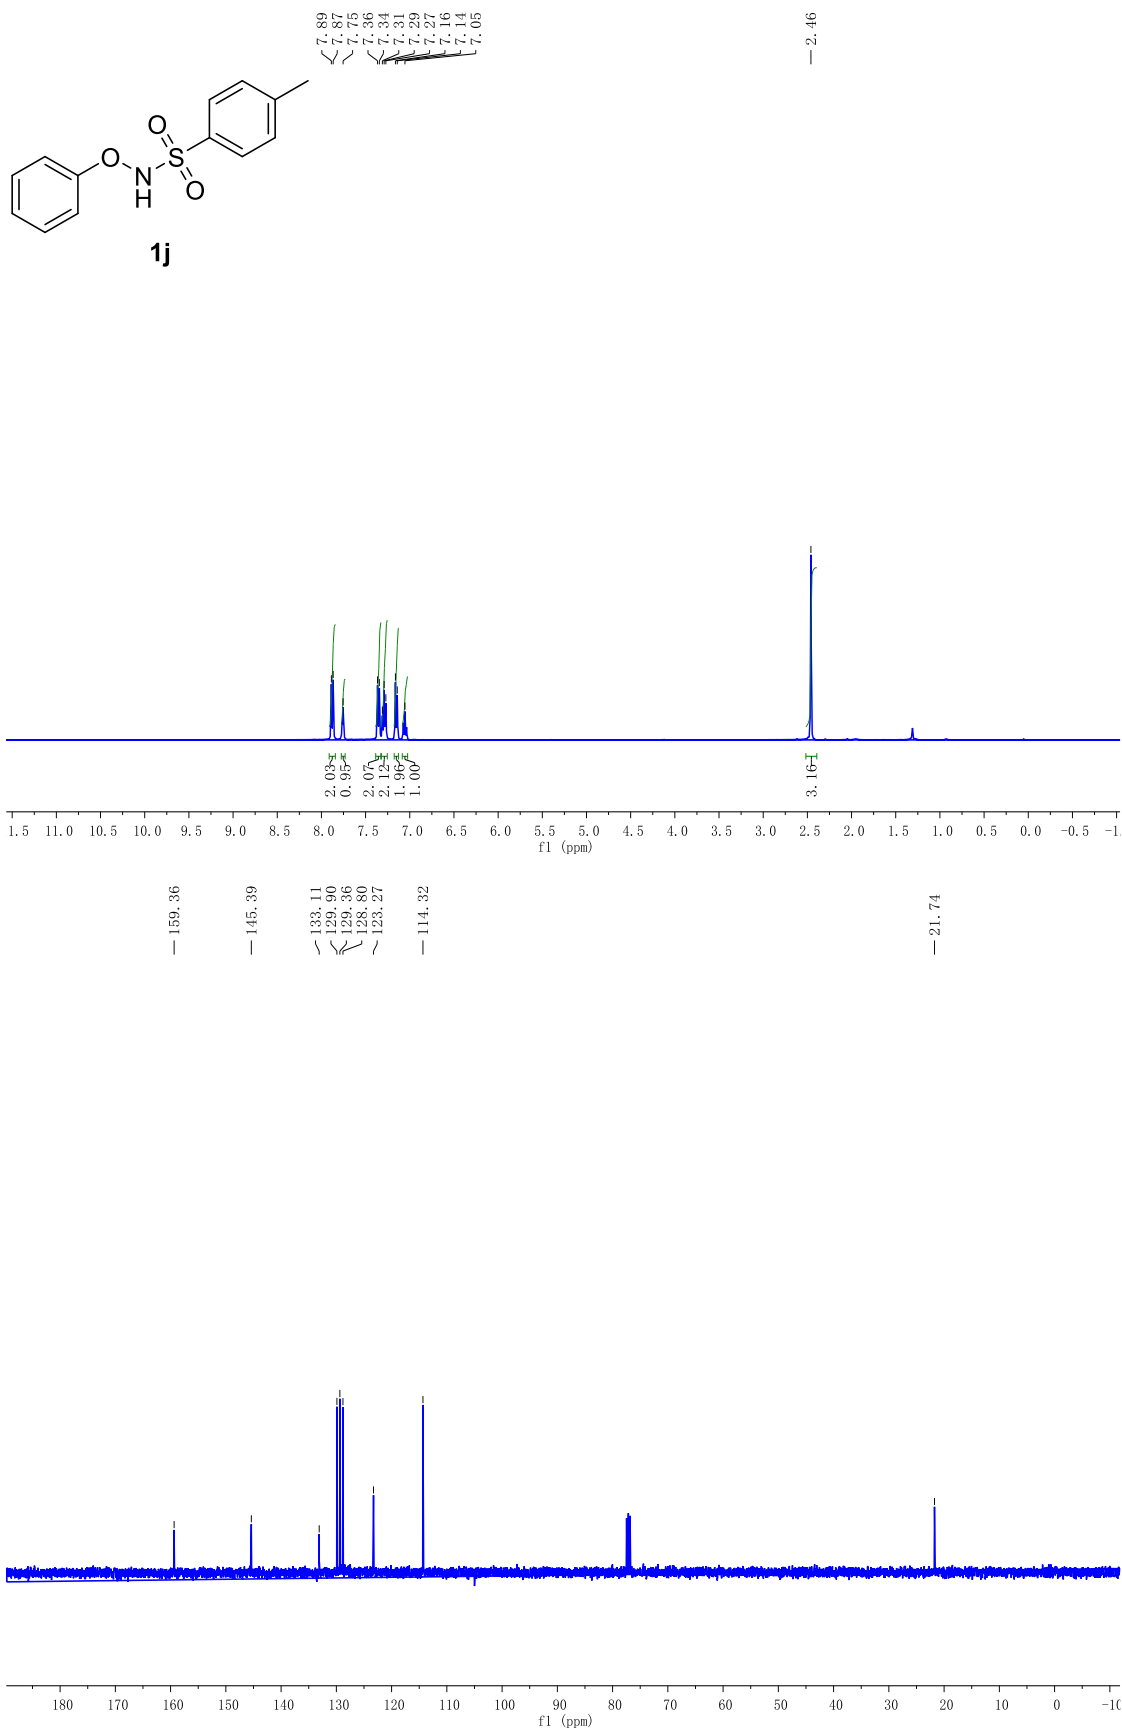

**Supplementary Figure 22.**  $^1\text{H}$  and  $^{13}\text{C}$  NMR spectra for compound **1j**

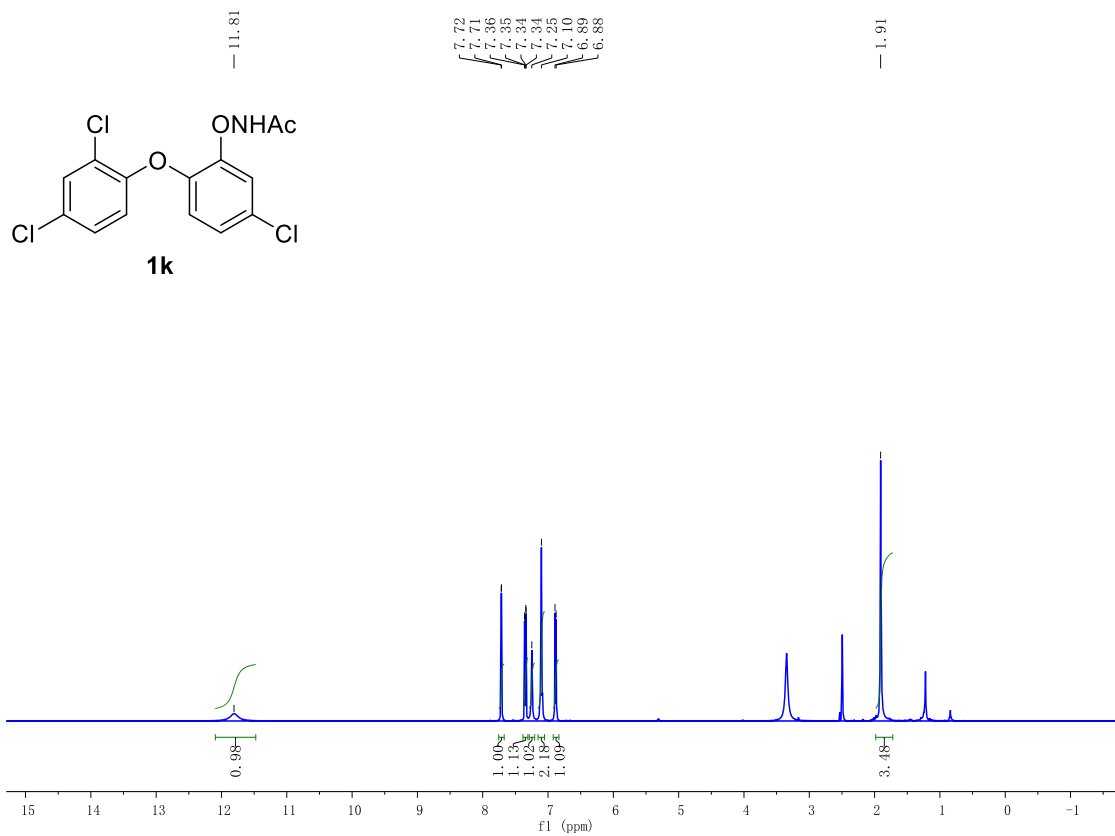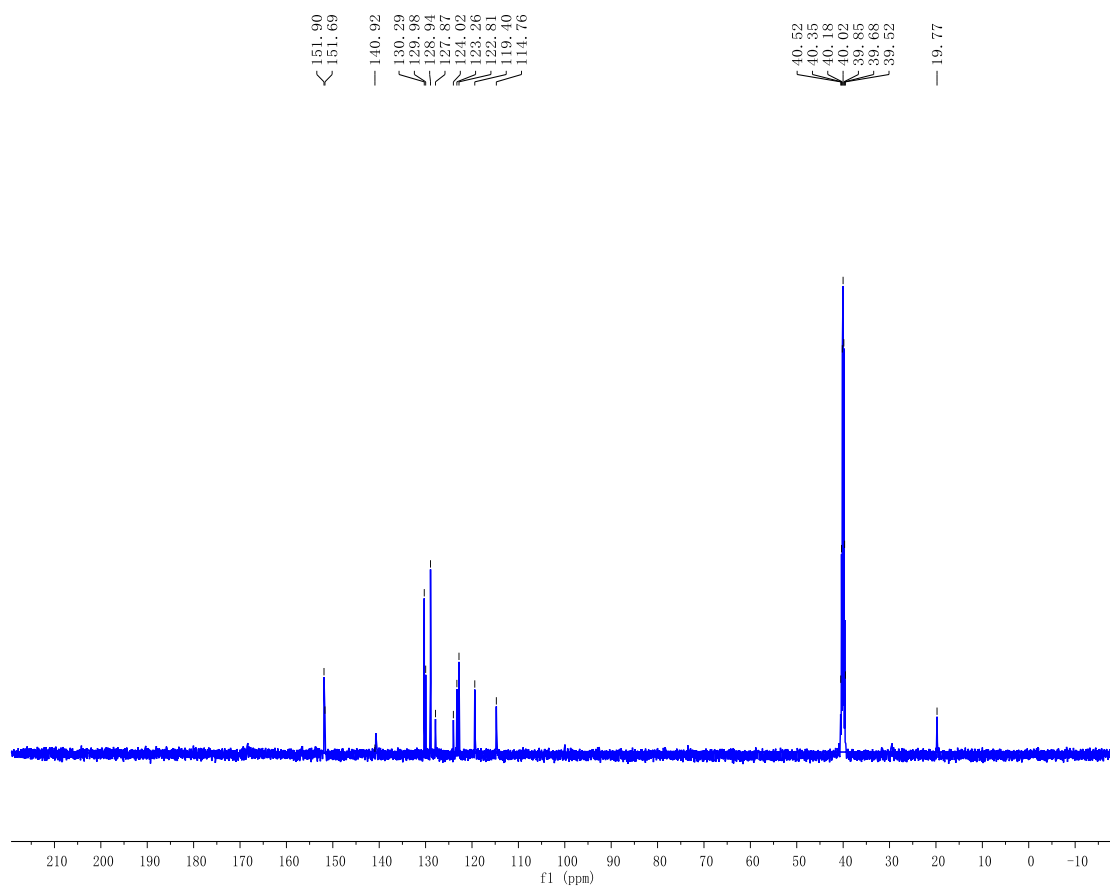

**Supplementary Figure 23.**  $^1\text{H}$  and  $^{13}\text{C}$  NMR spectra for compound **1k**

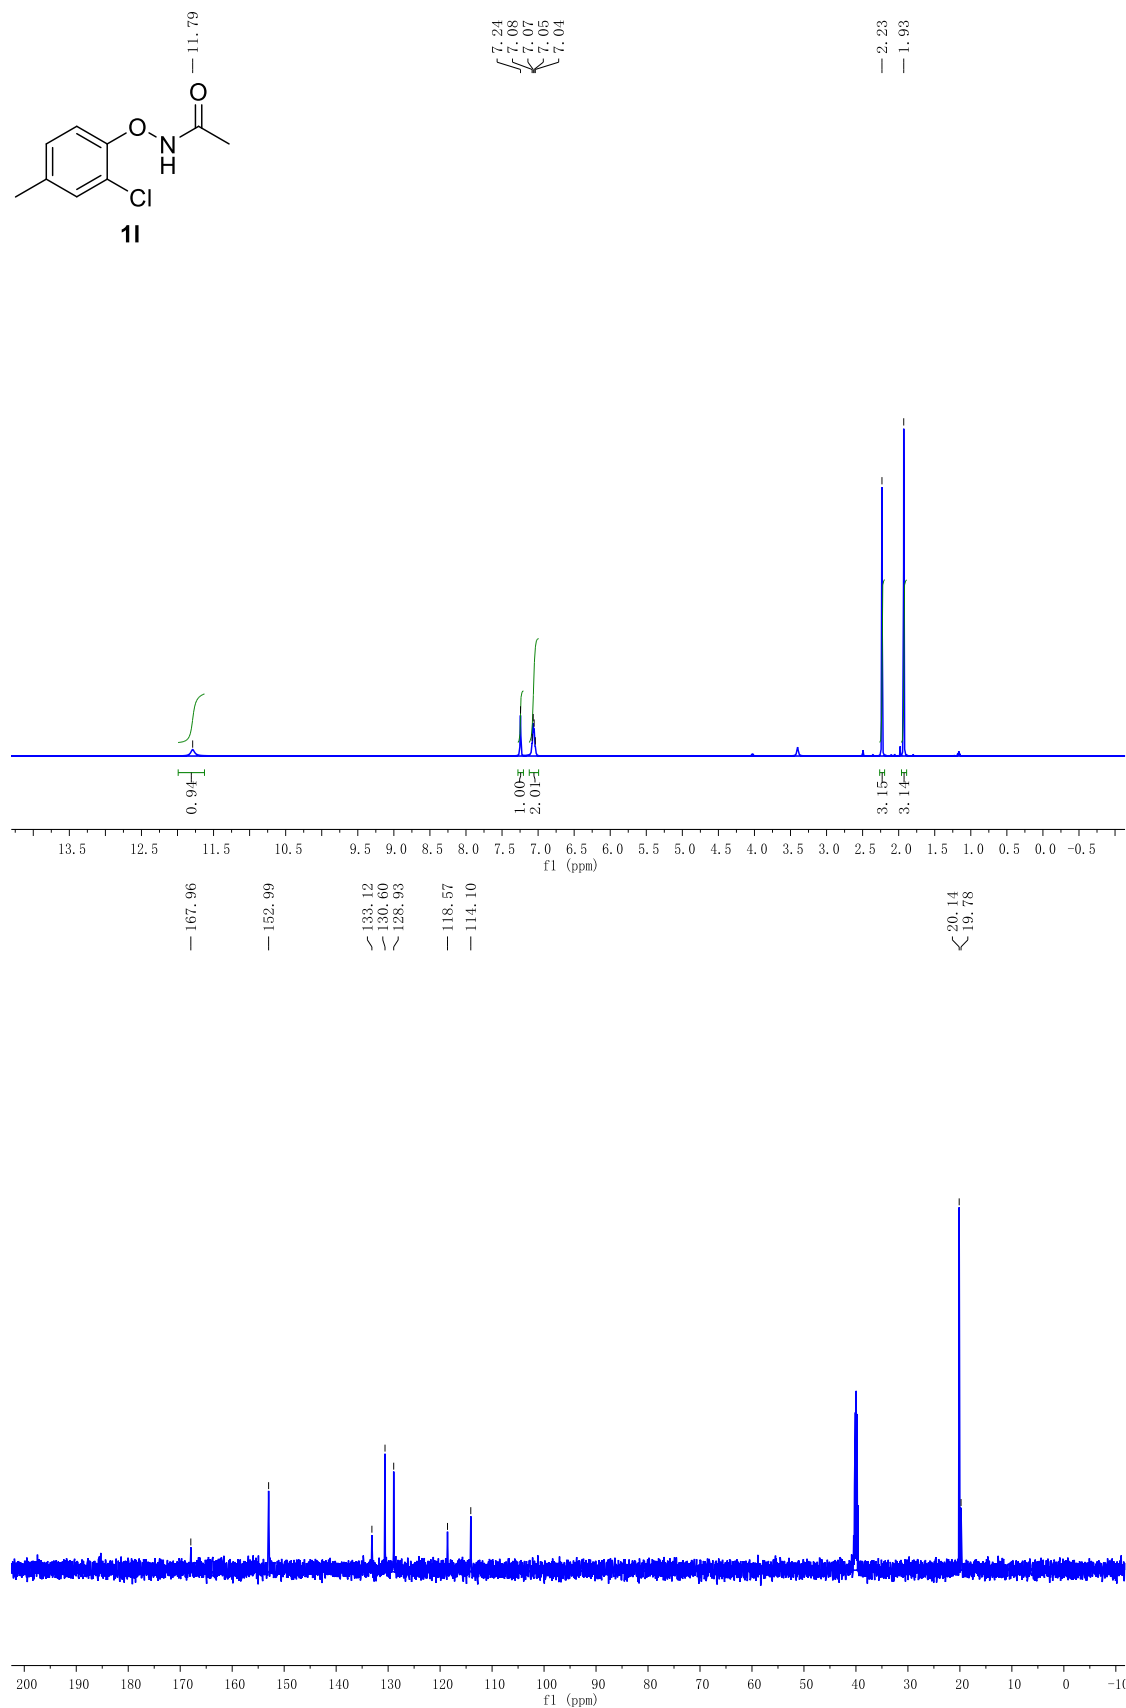

**Supplementary Figure 24.** <sup>1</sup>H and <sup>13</sup>C NMR spectra for compound **11**



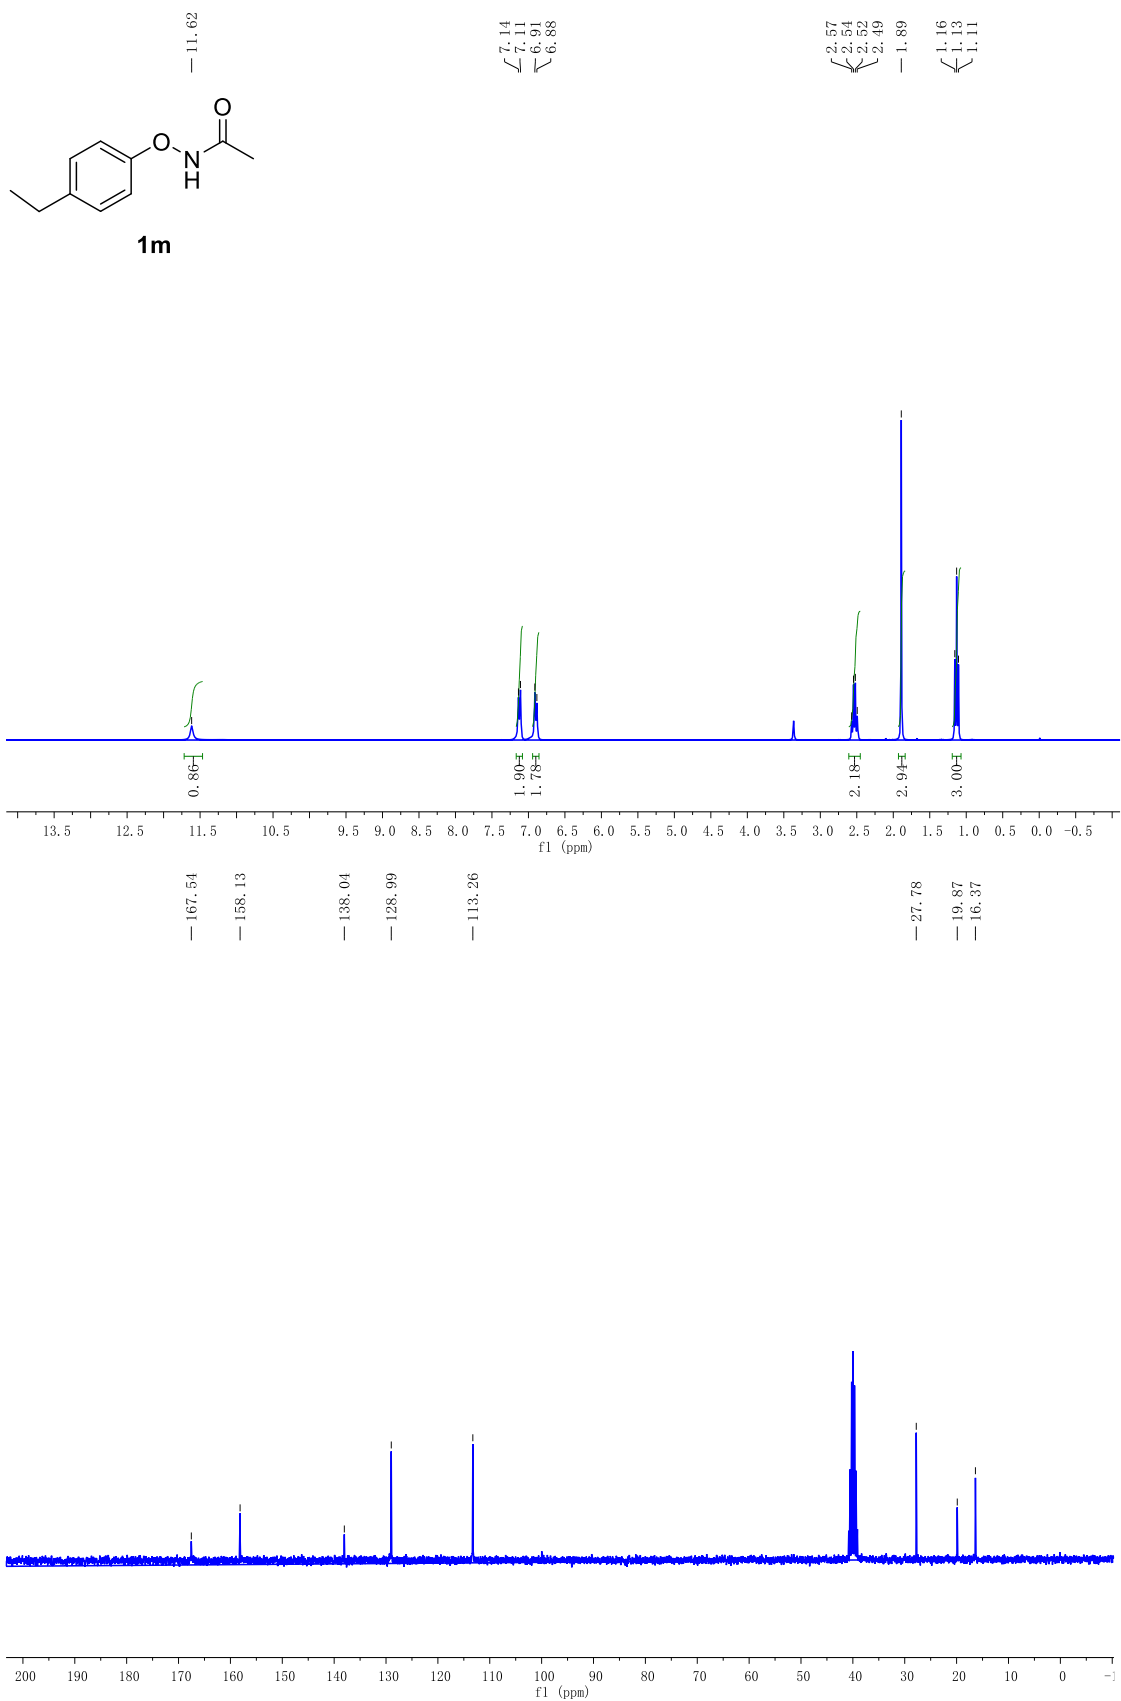

**Supplementary Figure 25.**  $^1\text{H}$  and  $^{13}\text{C}$  NMR spectra for compound **1m**

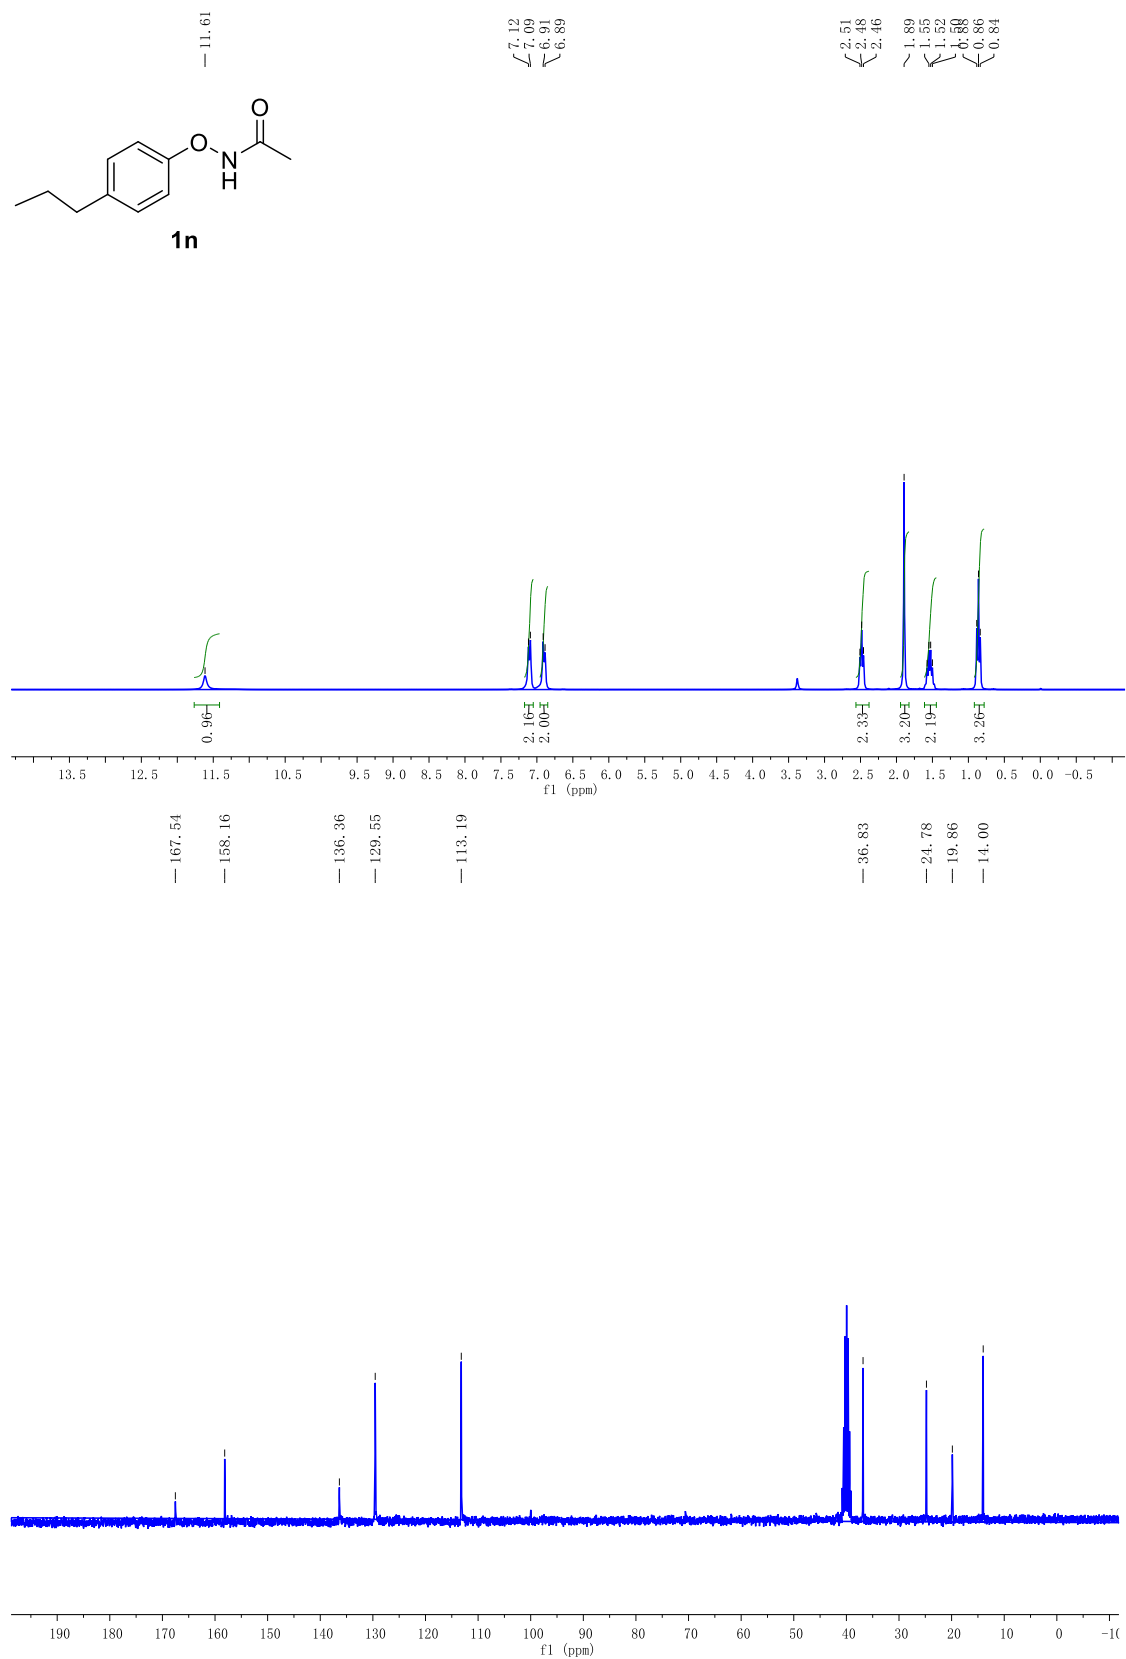

Supplementary Figure 26. <sup>1</sup>H and <sup>13</sup>C NMR spectra for compound **1n**

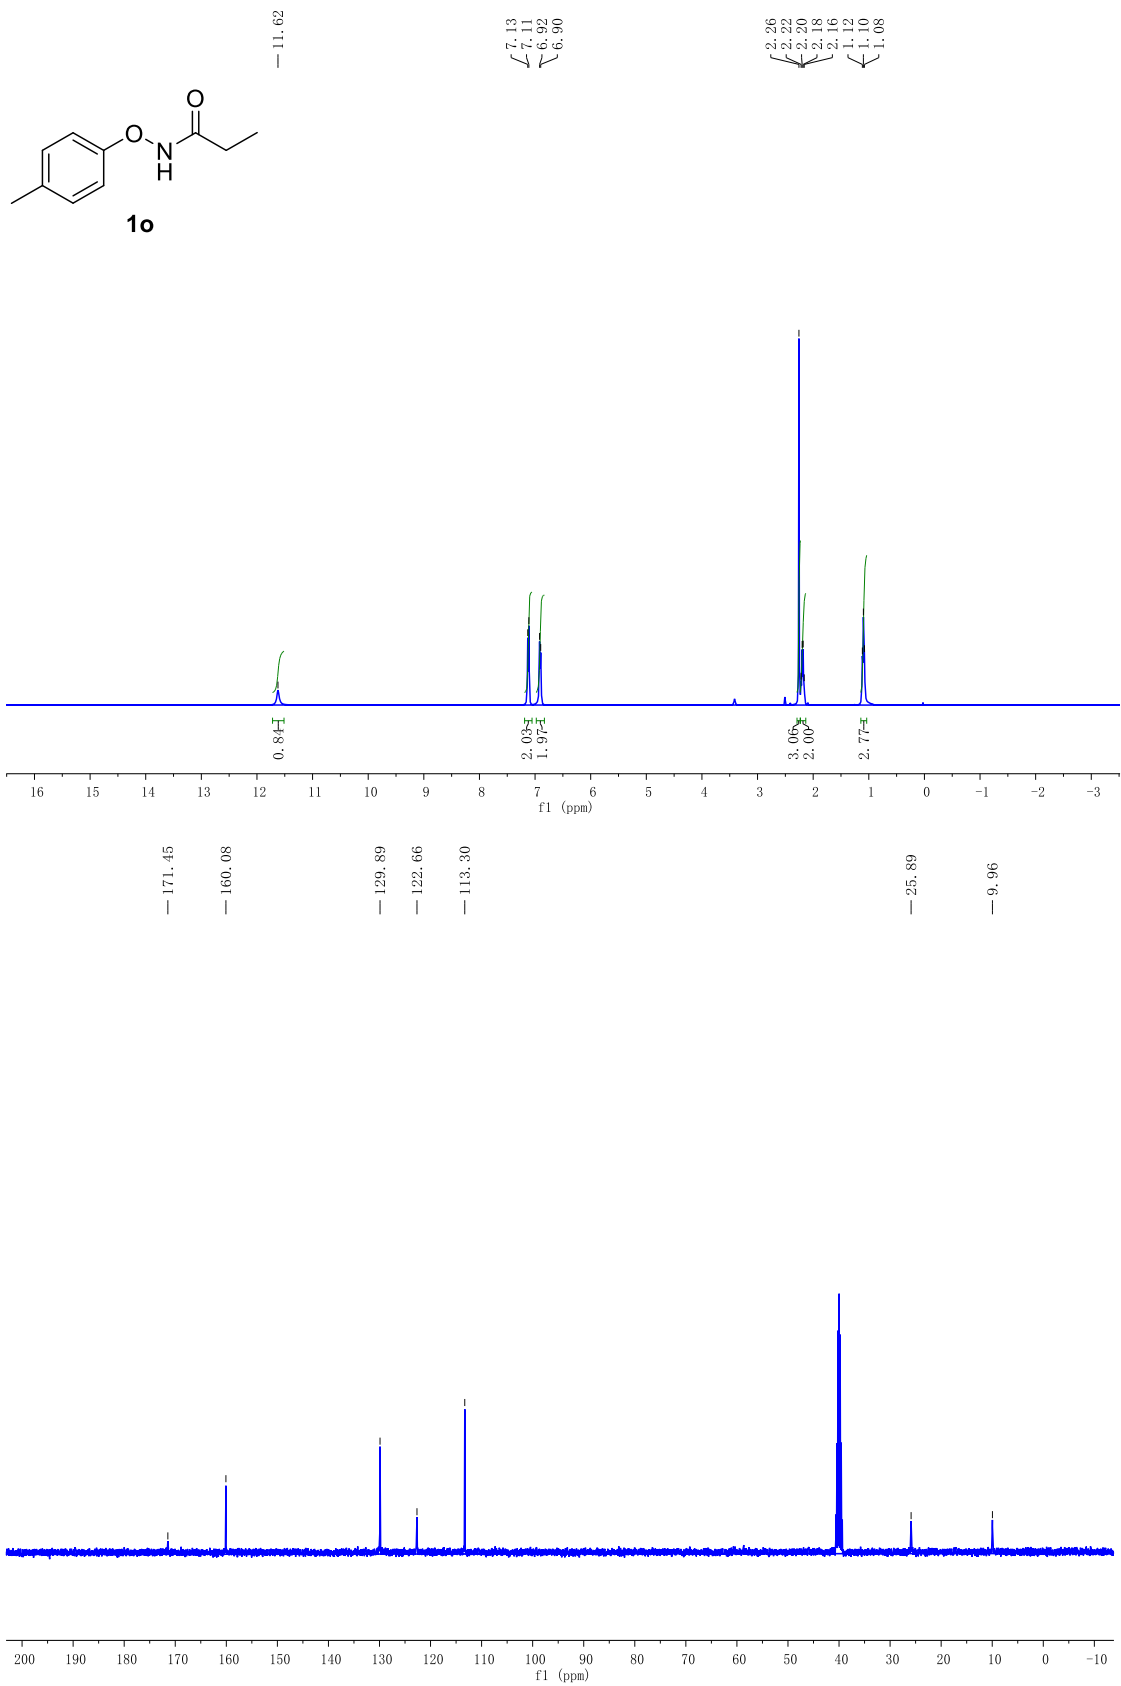

Supplementary Figure 27. <sup>1</sup>H and <sup>13</sup>C NMR spectra for compound **1o**

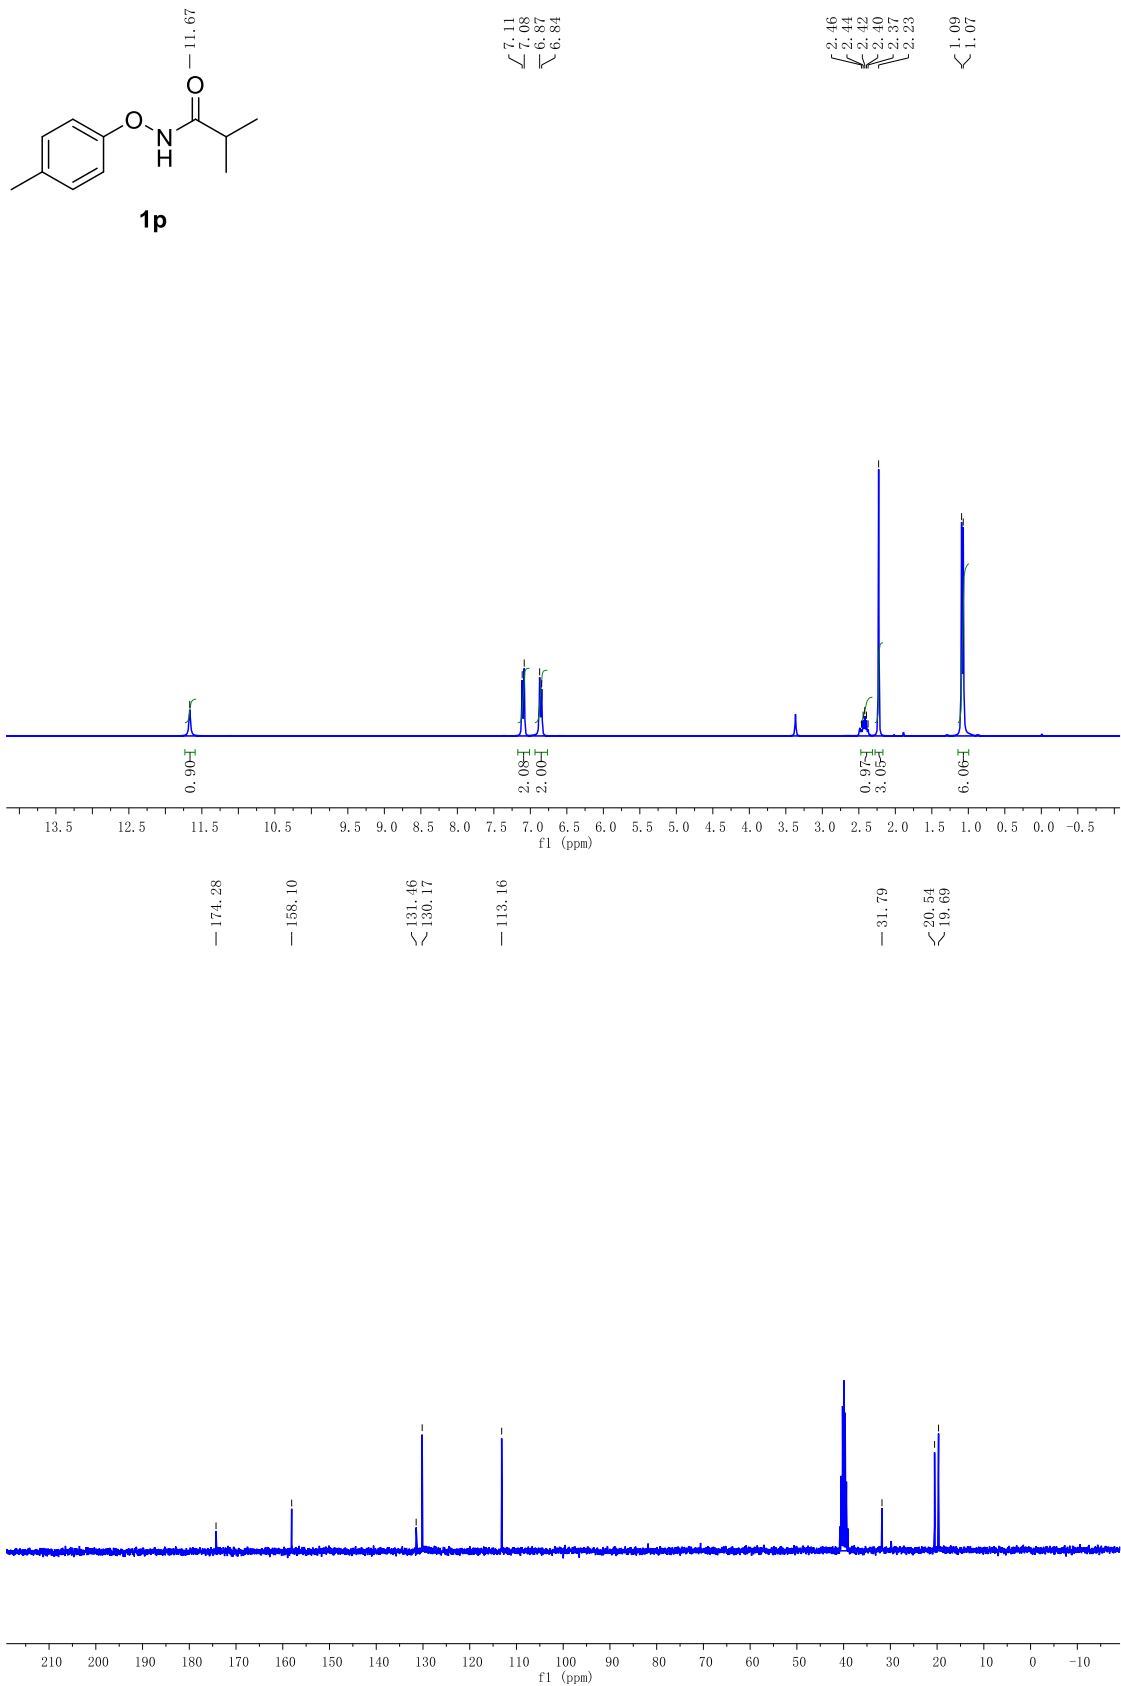

**Supplementary Figure 28.** <sup>1</sup>H and <sup>13</sup>C NMR spectra for compound **1p**

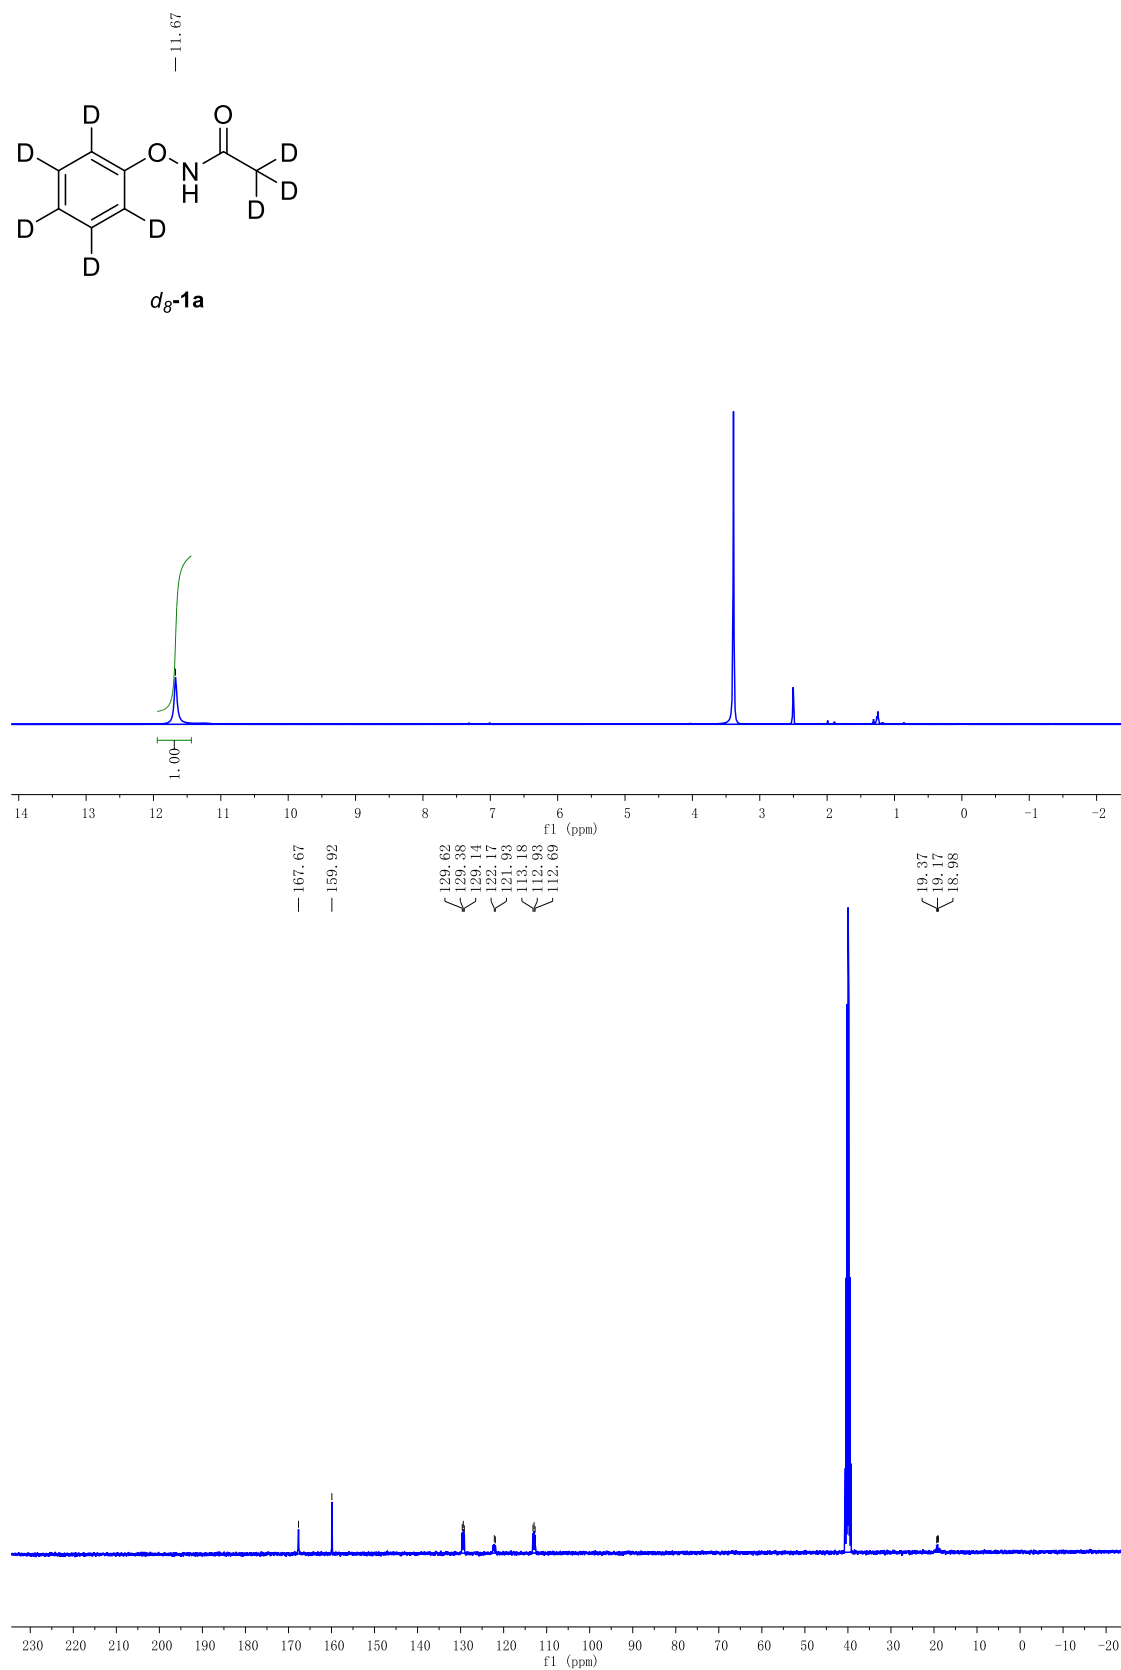

**Supplementary Figure 29.**  $^1\text{H}$  and  $^{13}\text{C}$  NMR spectra for compound  $d_8$ -1a

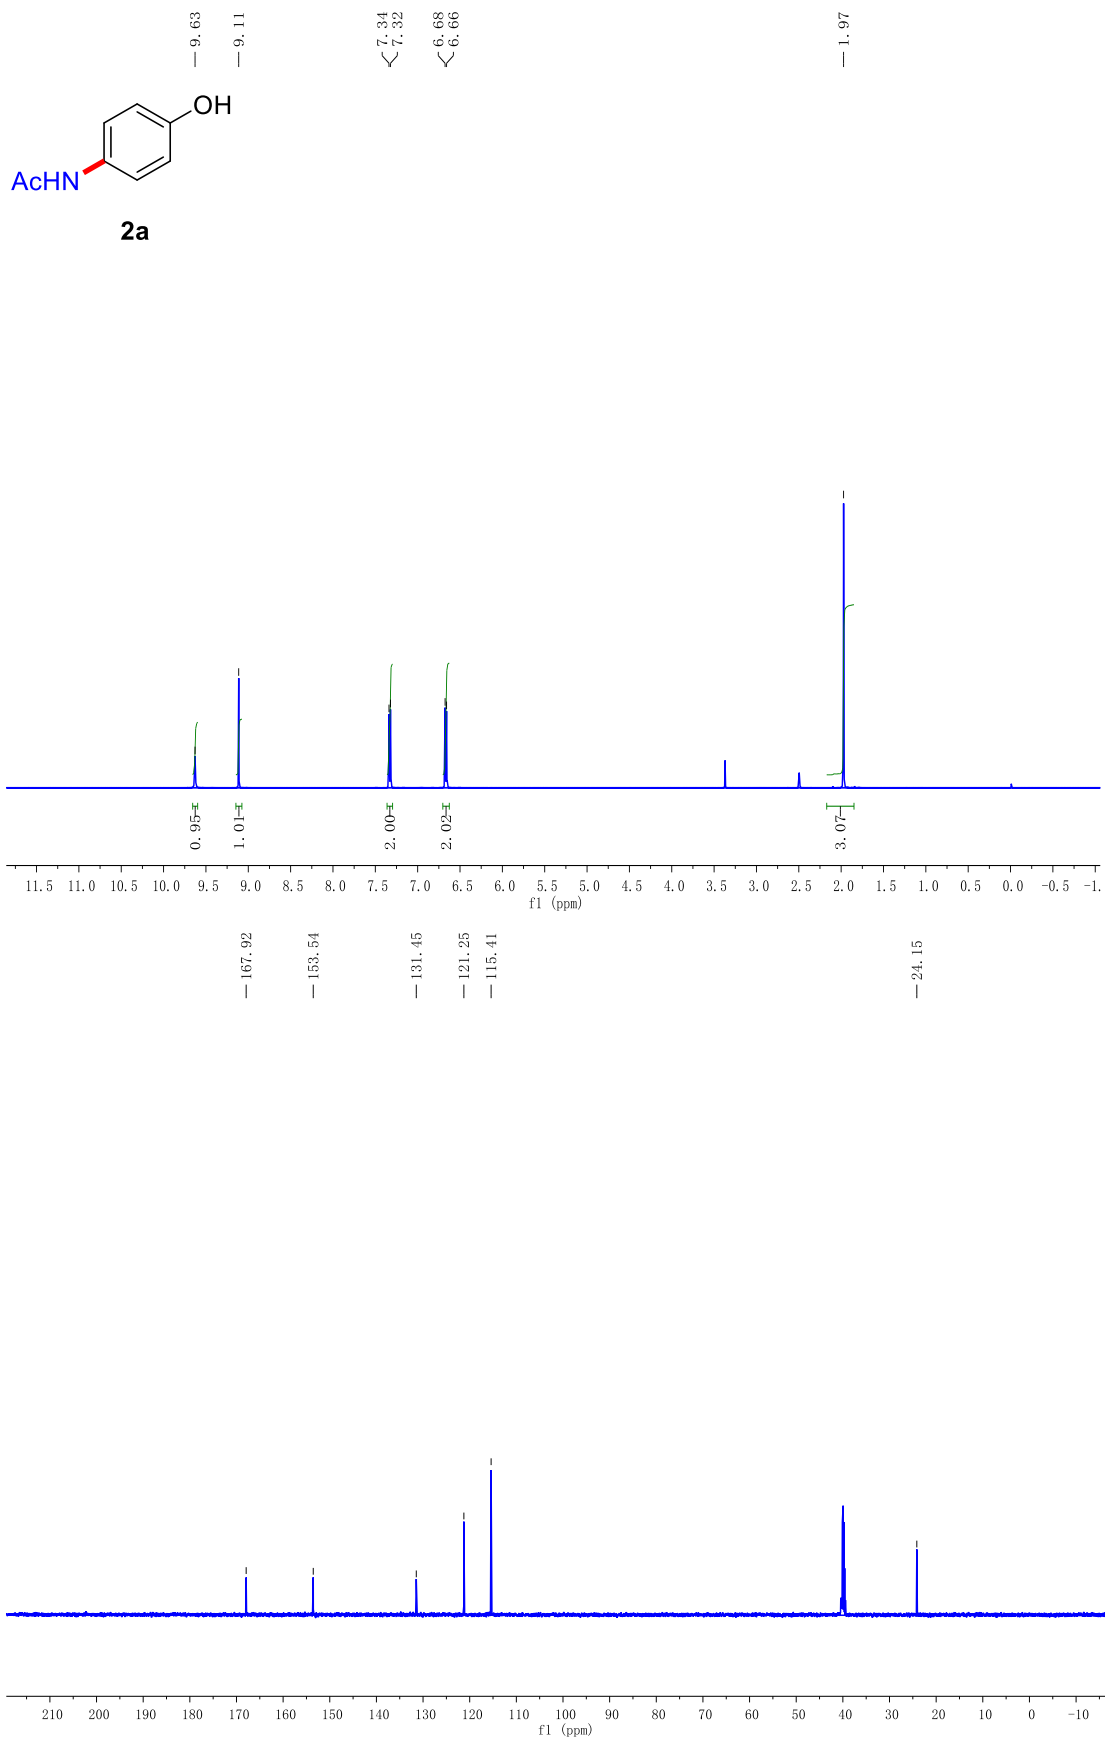

Supplementary Figure 30. <sup>1</sup>H and <sup>13</sup>C NMR spectra for compound 2a

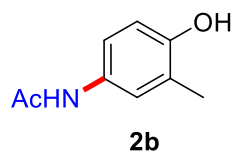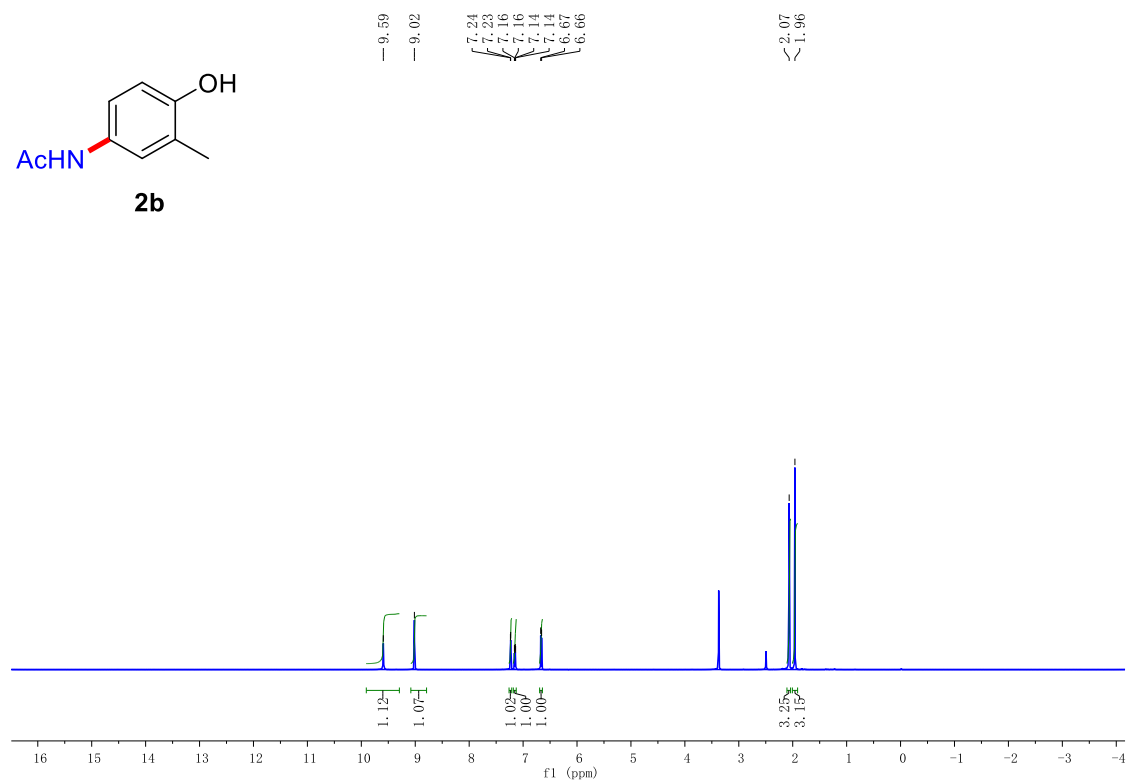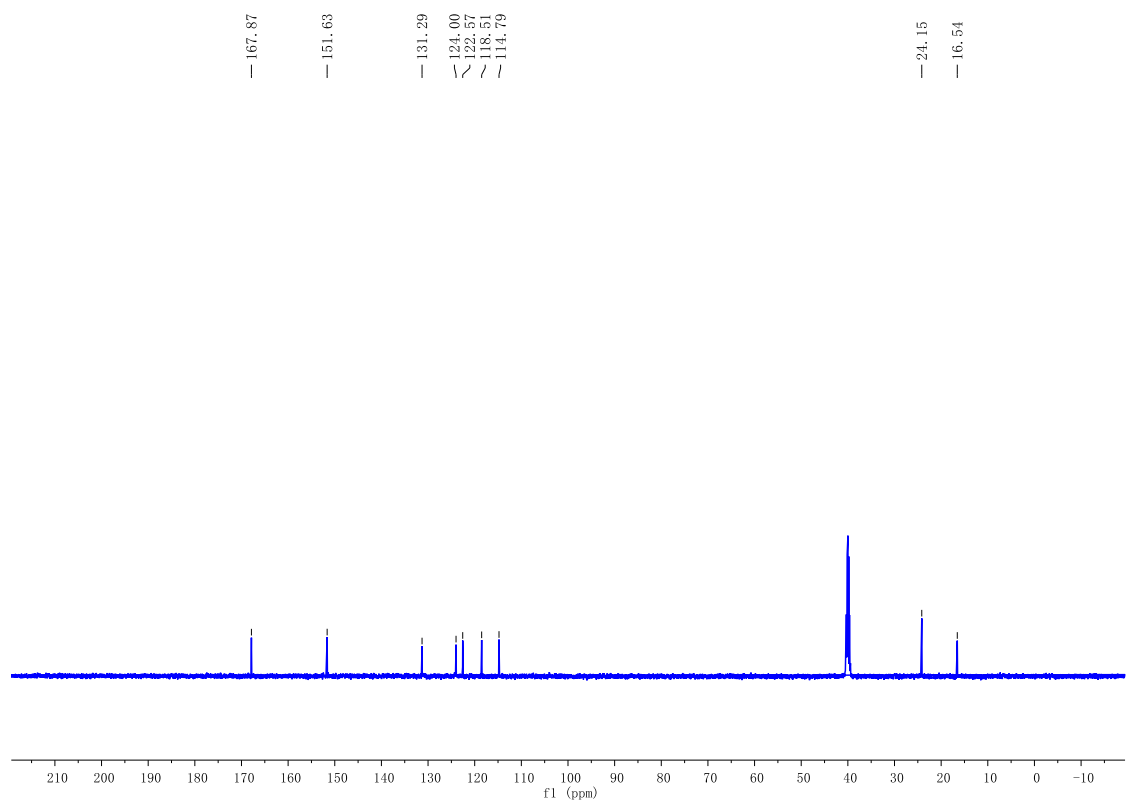

Supplementary Figure 31.  $^1\text{H}$  and  $^{13}\text{C}$  NMR spectra for compound **2b**

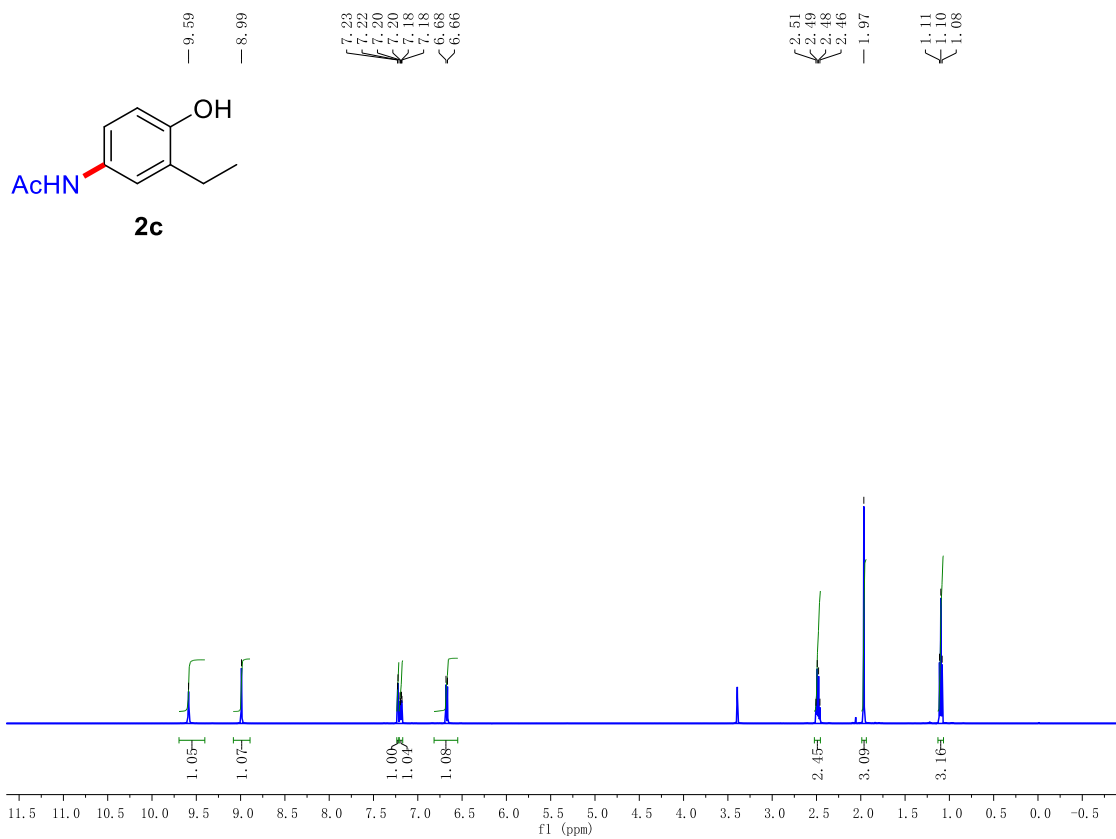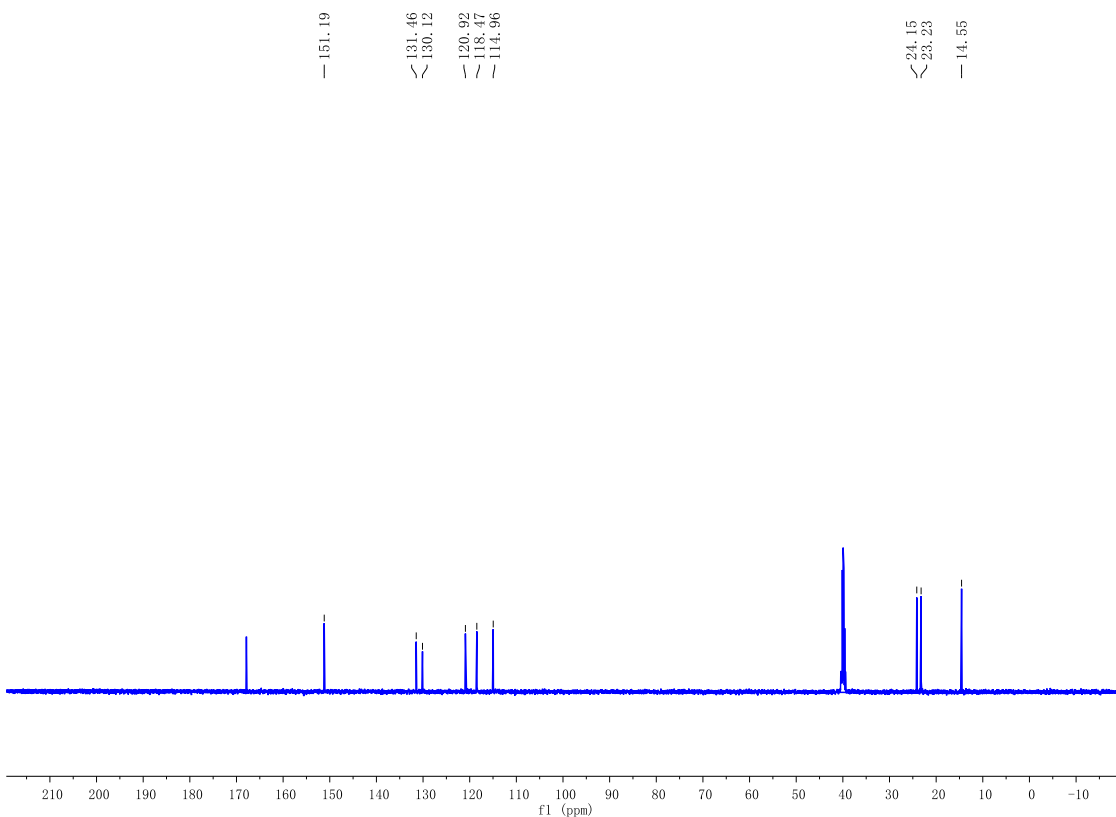

Supplementary Figure 32. <sup>1</sup>H and <sup>13</sup>C NMR spectra for compound **2c**



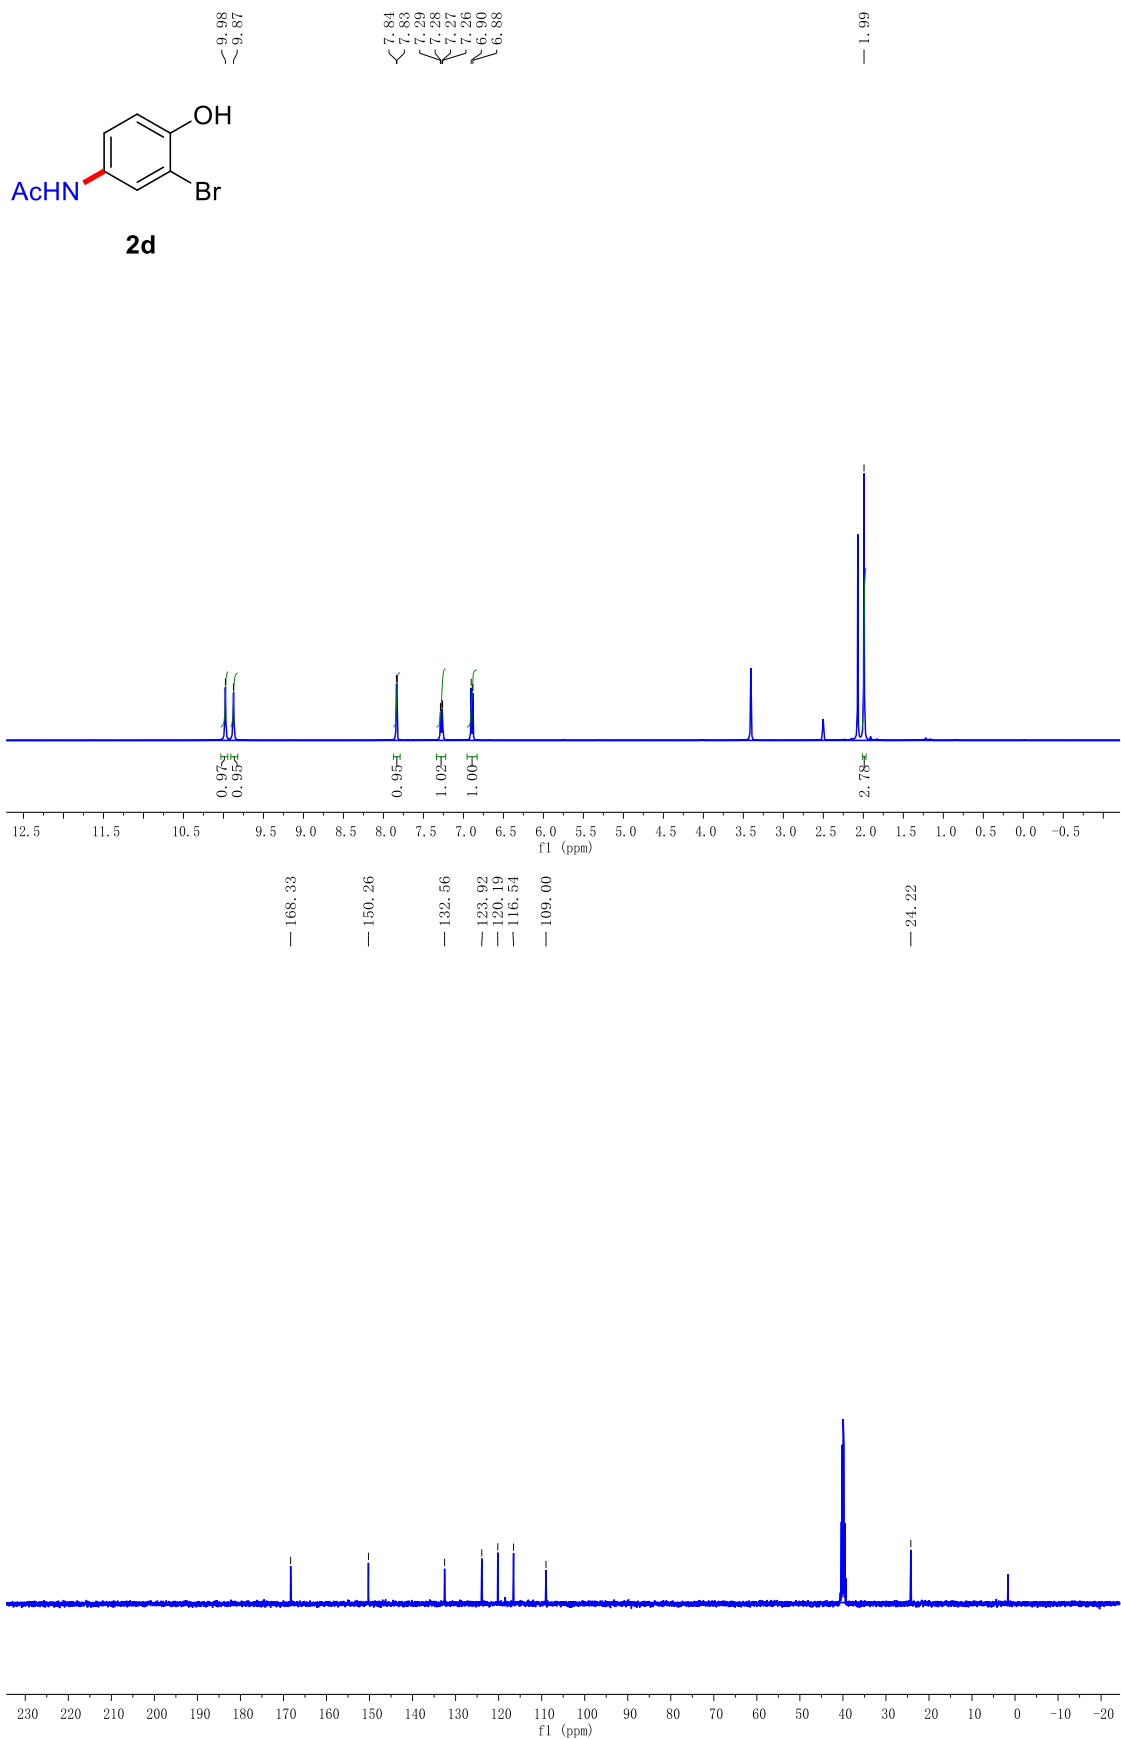

Supplementary Figure 33. <sup>1</sup>H and <sup>13</sup>C NMR spectra for compound **2d**

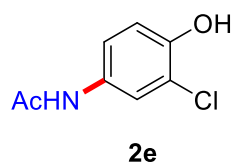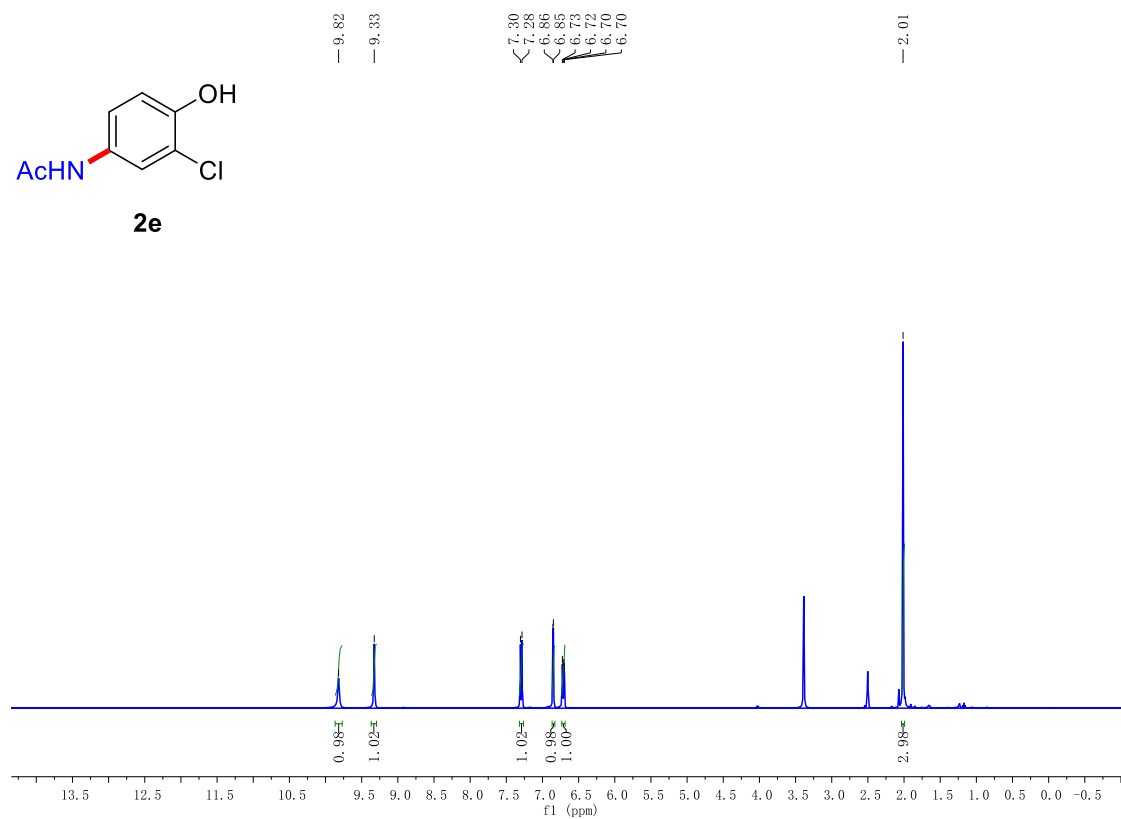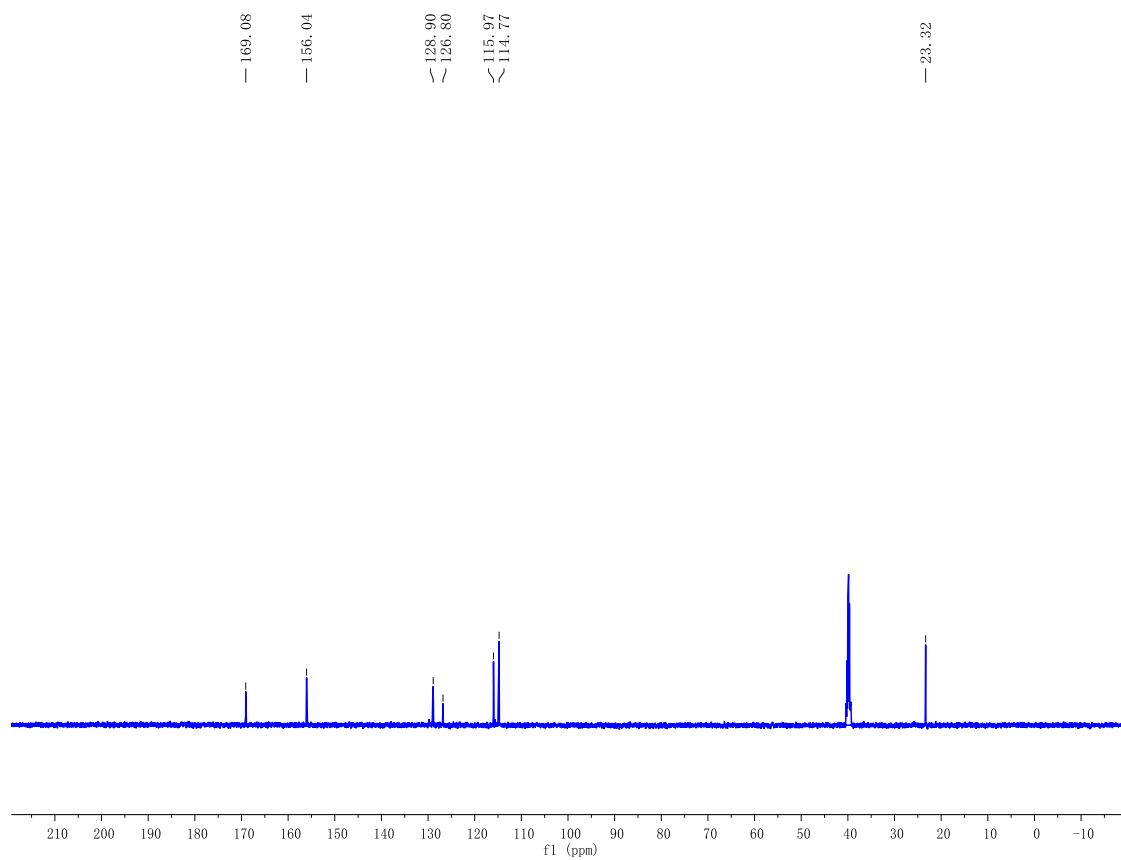

Supplementary Figure 34. <sup>1</sup>H and <sup>13</sup>C NMR spectra for compound **2e**

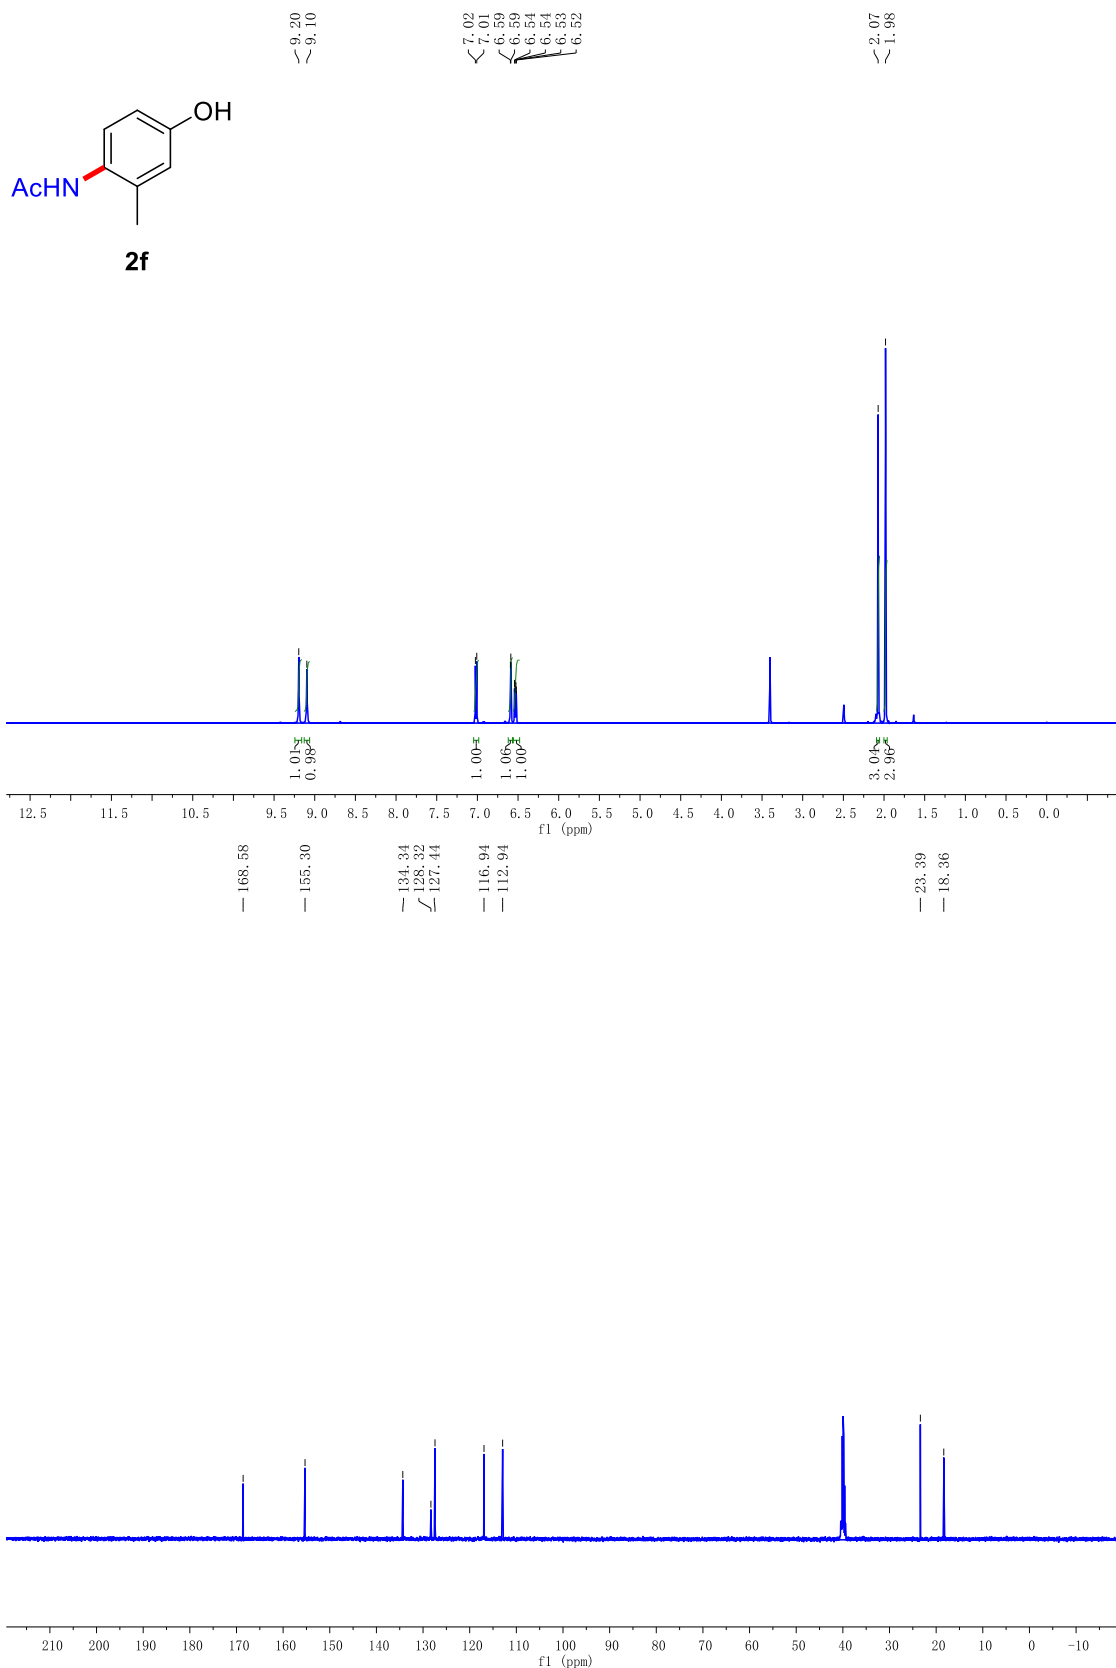

Supplementary Figure 35. <sup>1</sup>H and <sup>13</sup>C NMR spectra for compound **2f**

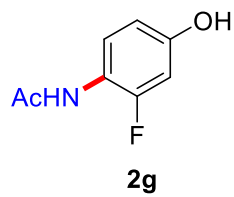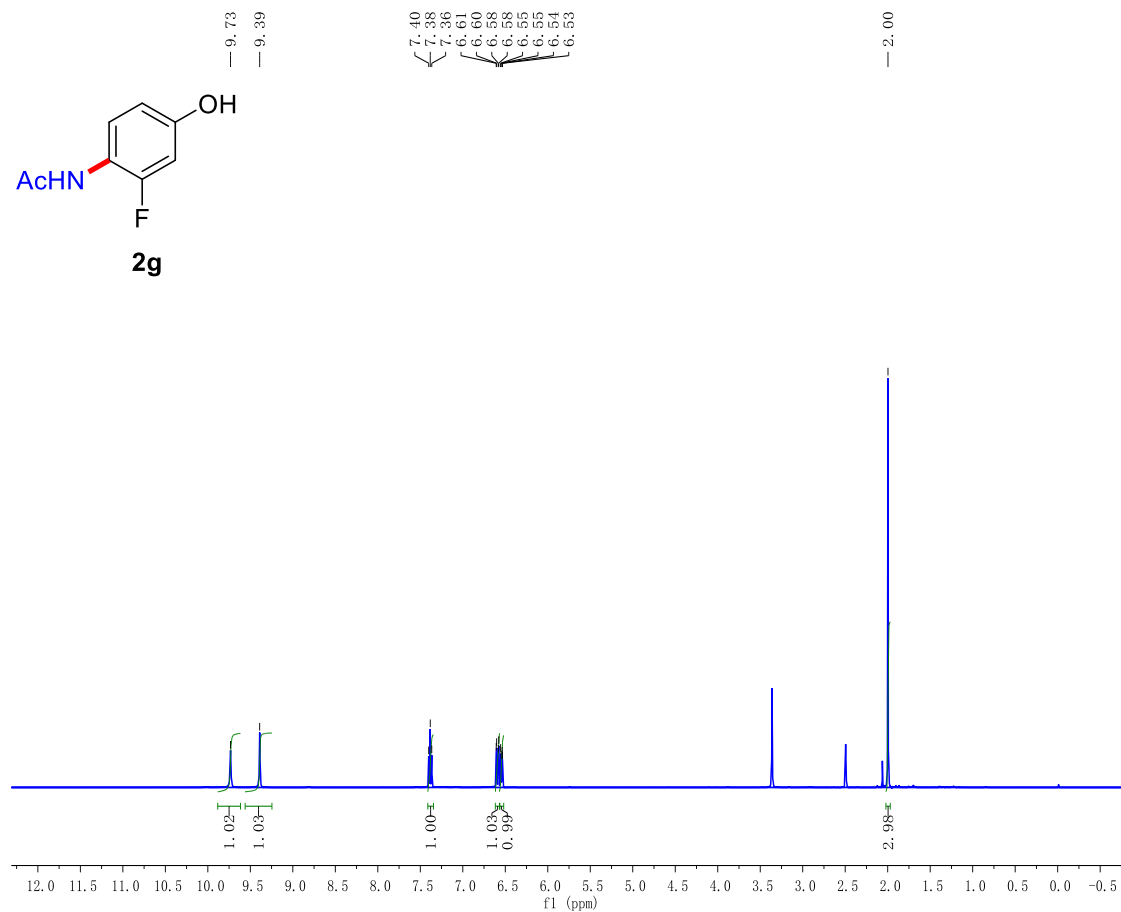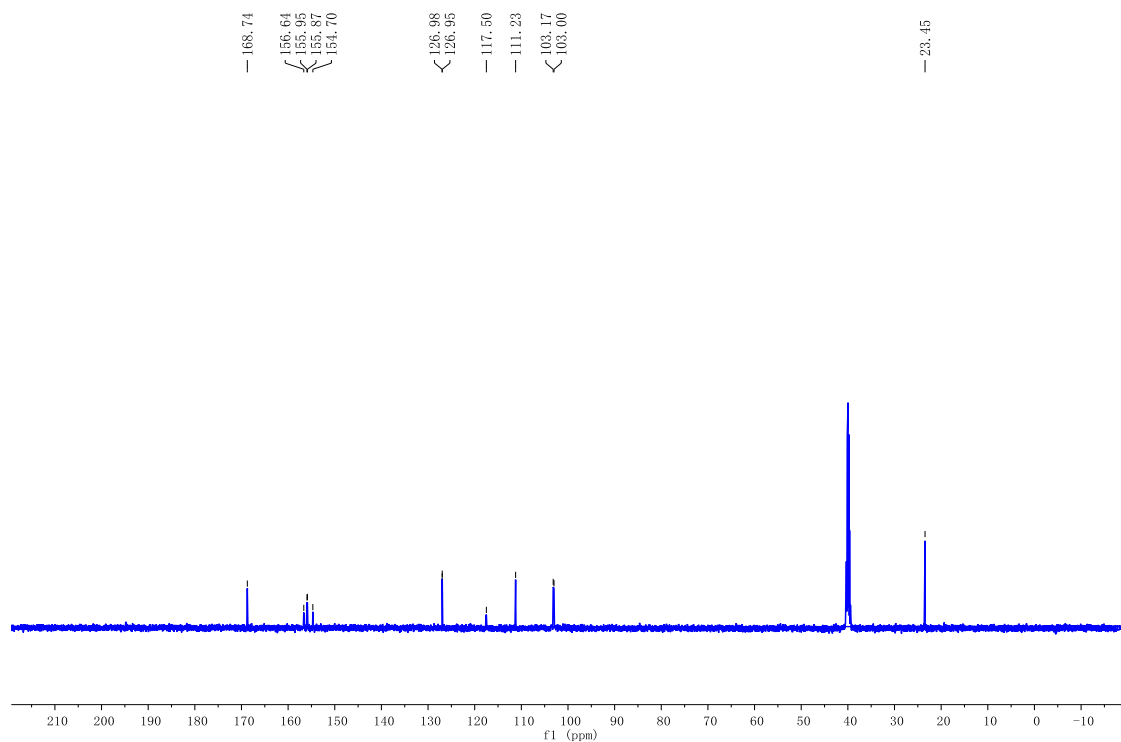

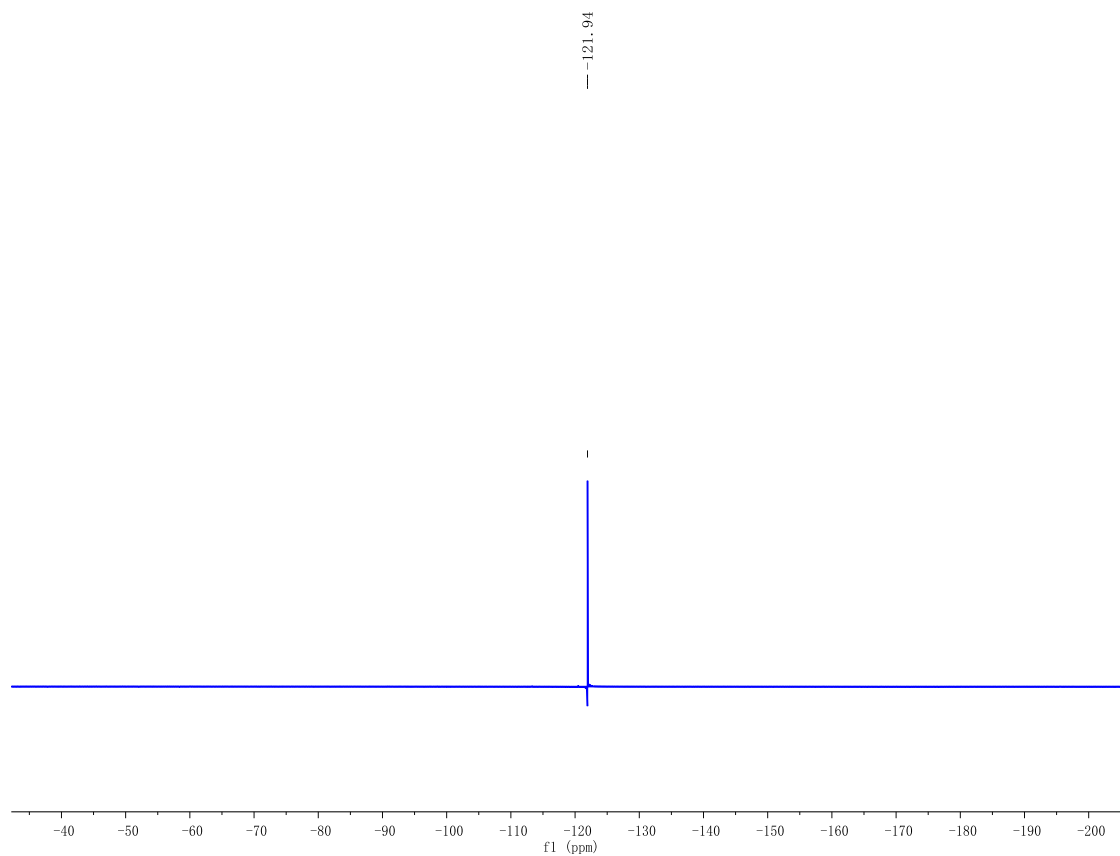

**Supplementary Figure 36.**  $^1\text{H}$ ,  $^{13}\text{C}$  and  $^{19}\text{F}$  NMR spectra for compound **2g**

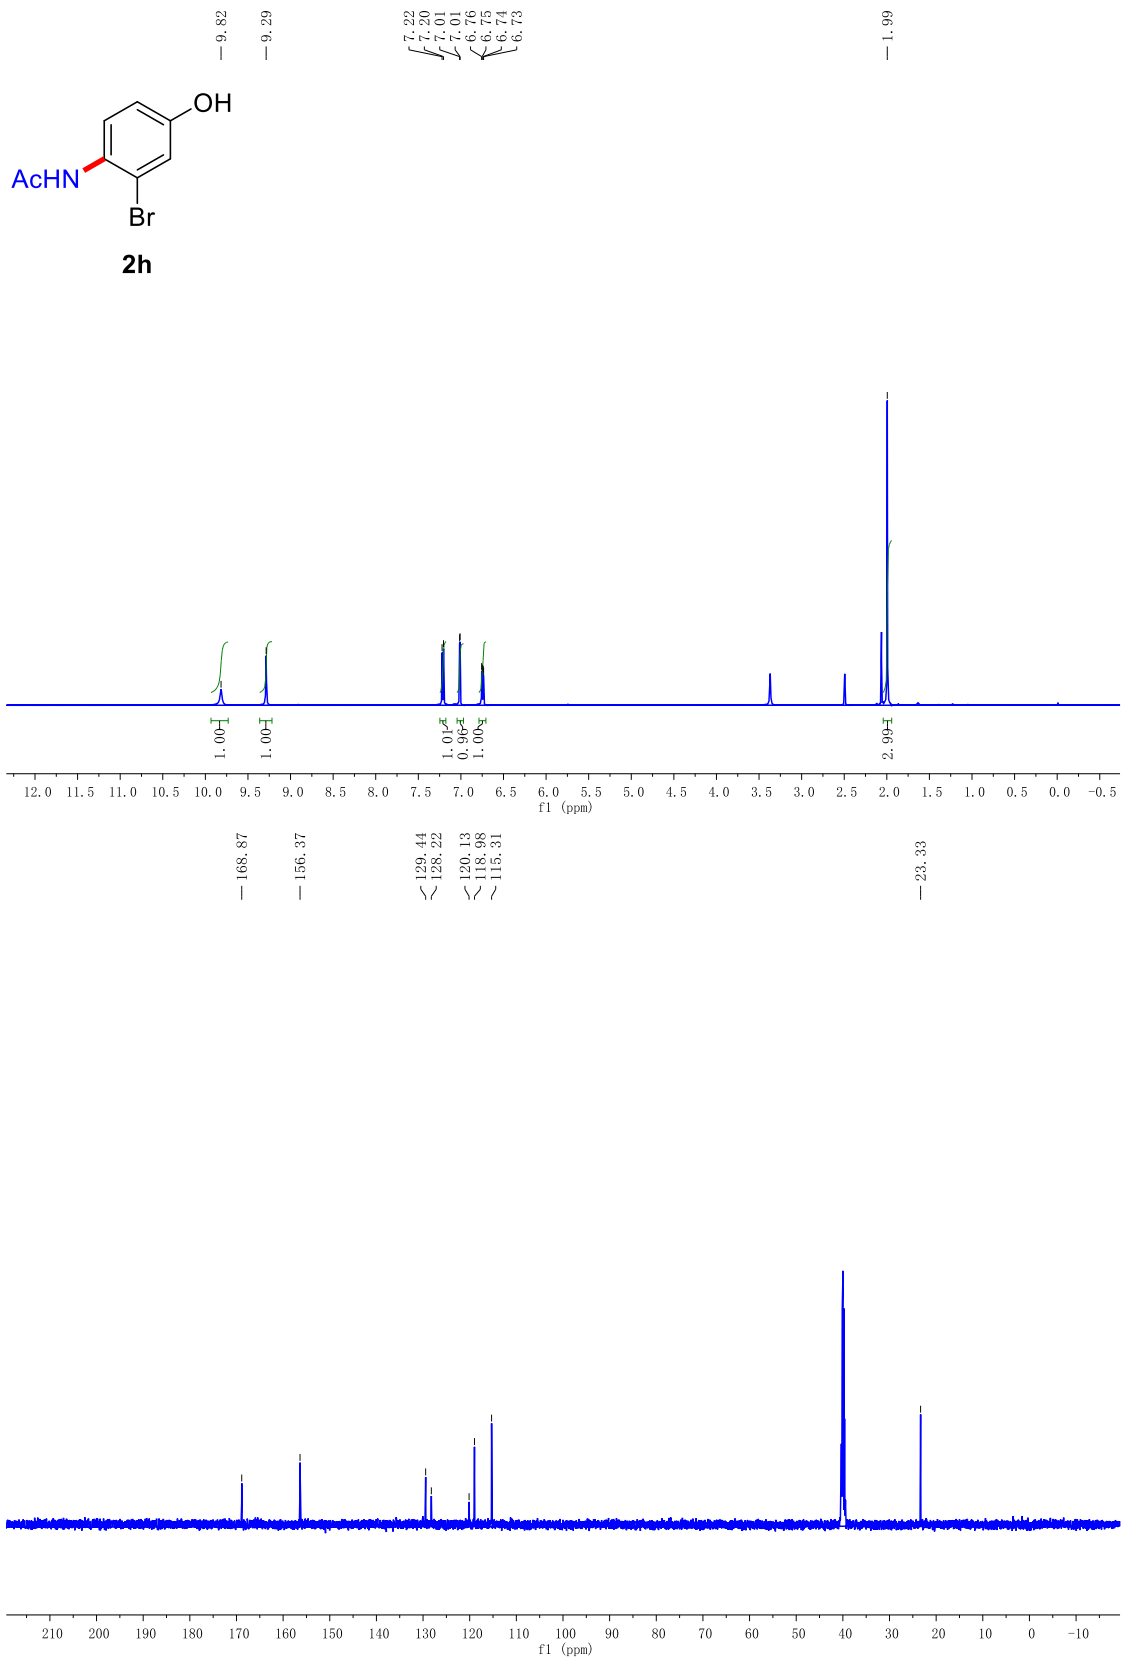

Supplementary Figure 37. <sup>1</sup>H and <sup>13</sup>C NMR spectra for compound **2h**

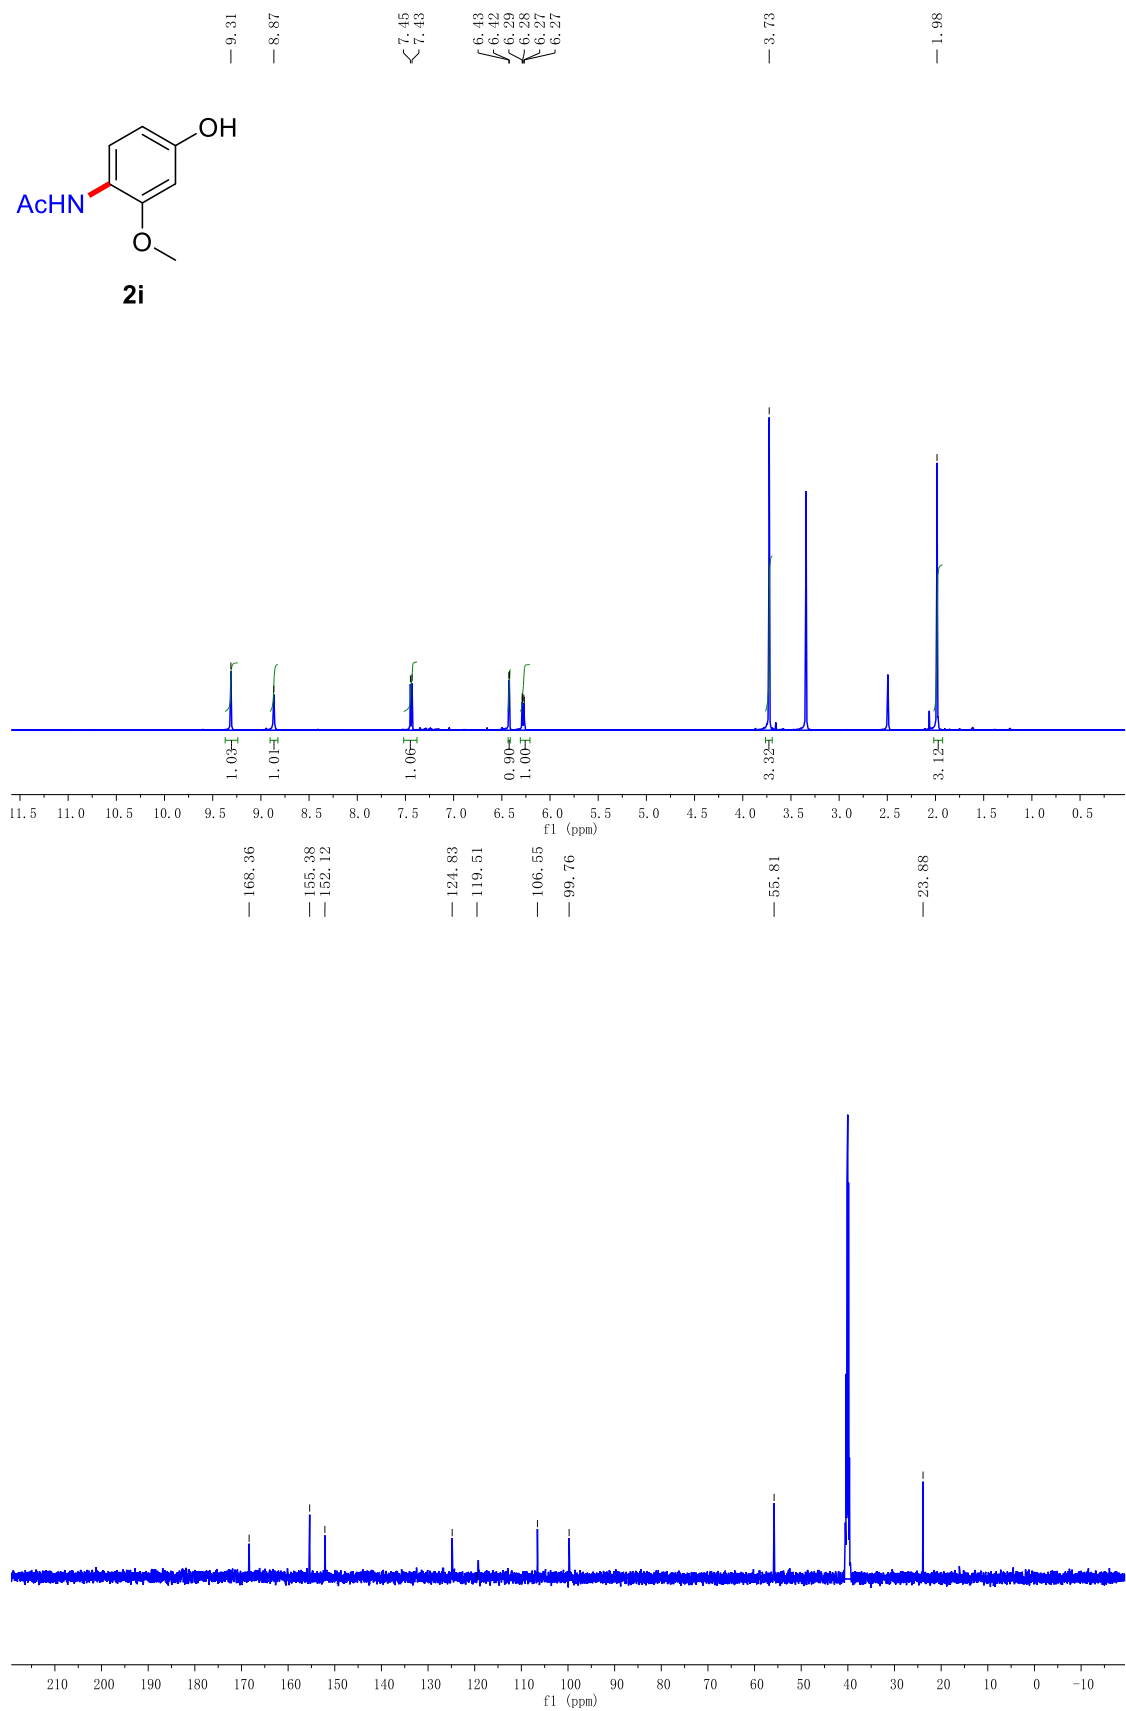

Supplementary Figure 38. <sup>1</sup>H and <sup>13</sup>C NMR spectra for compound **2i**

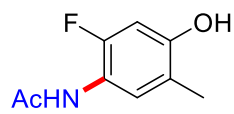

2j

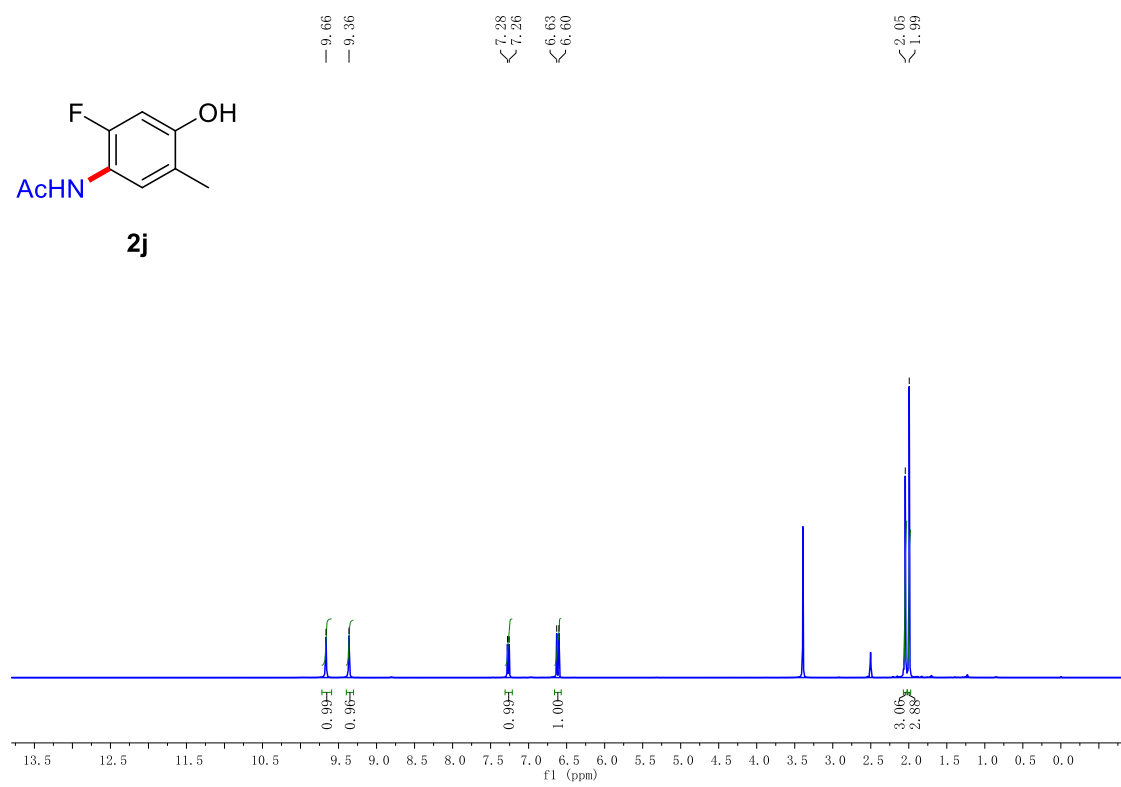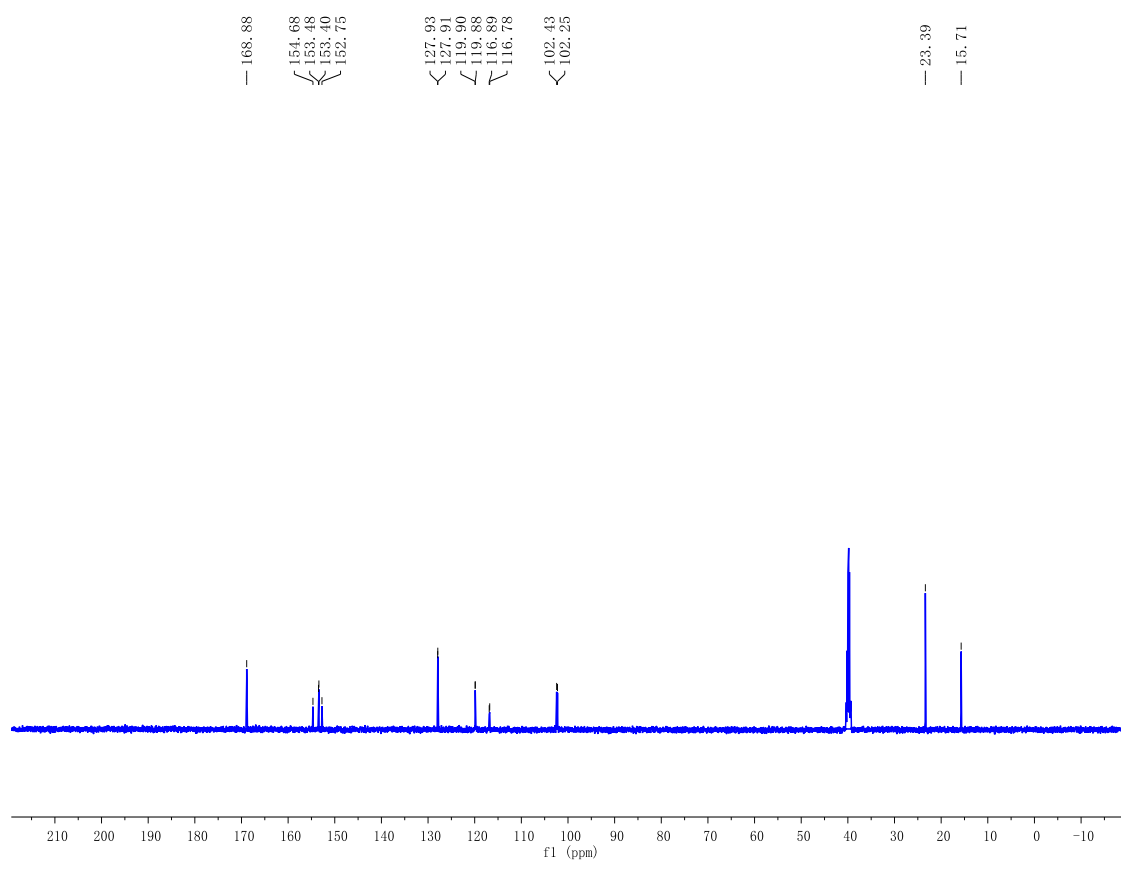



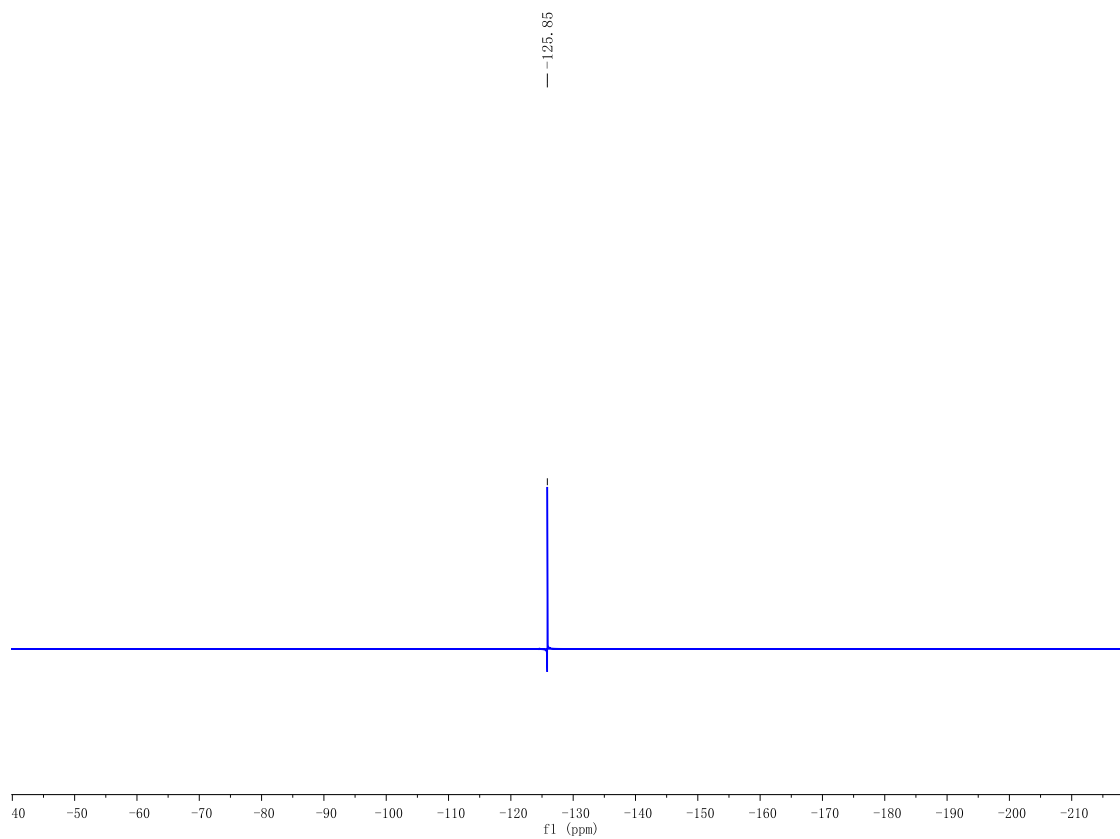

**Supplementary Figure 39.**  $^1\text{H}$ ,  $^{13}\text{C}$  and  $^{19}\text{F}$  NMR spectra for compound **2j**

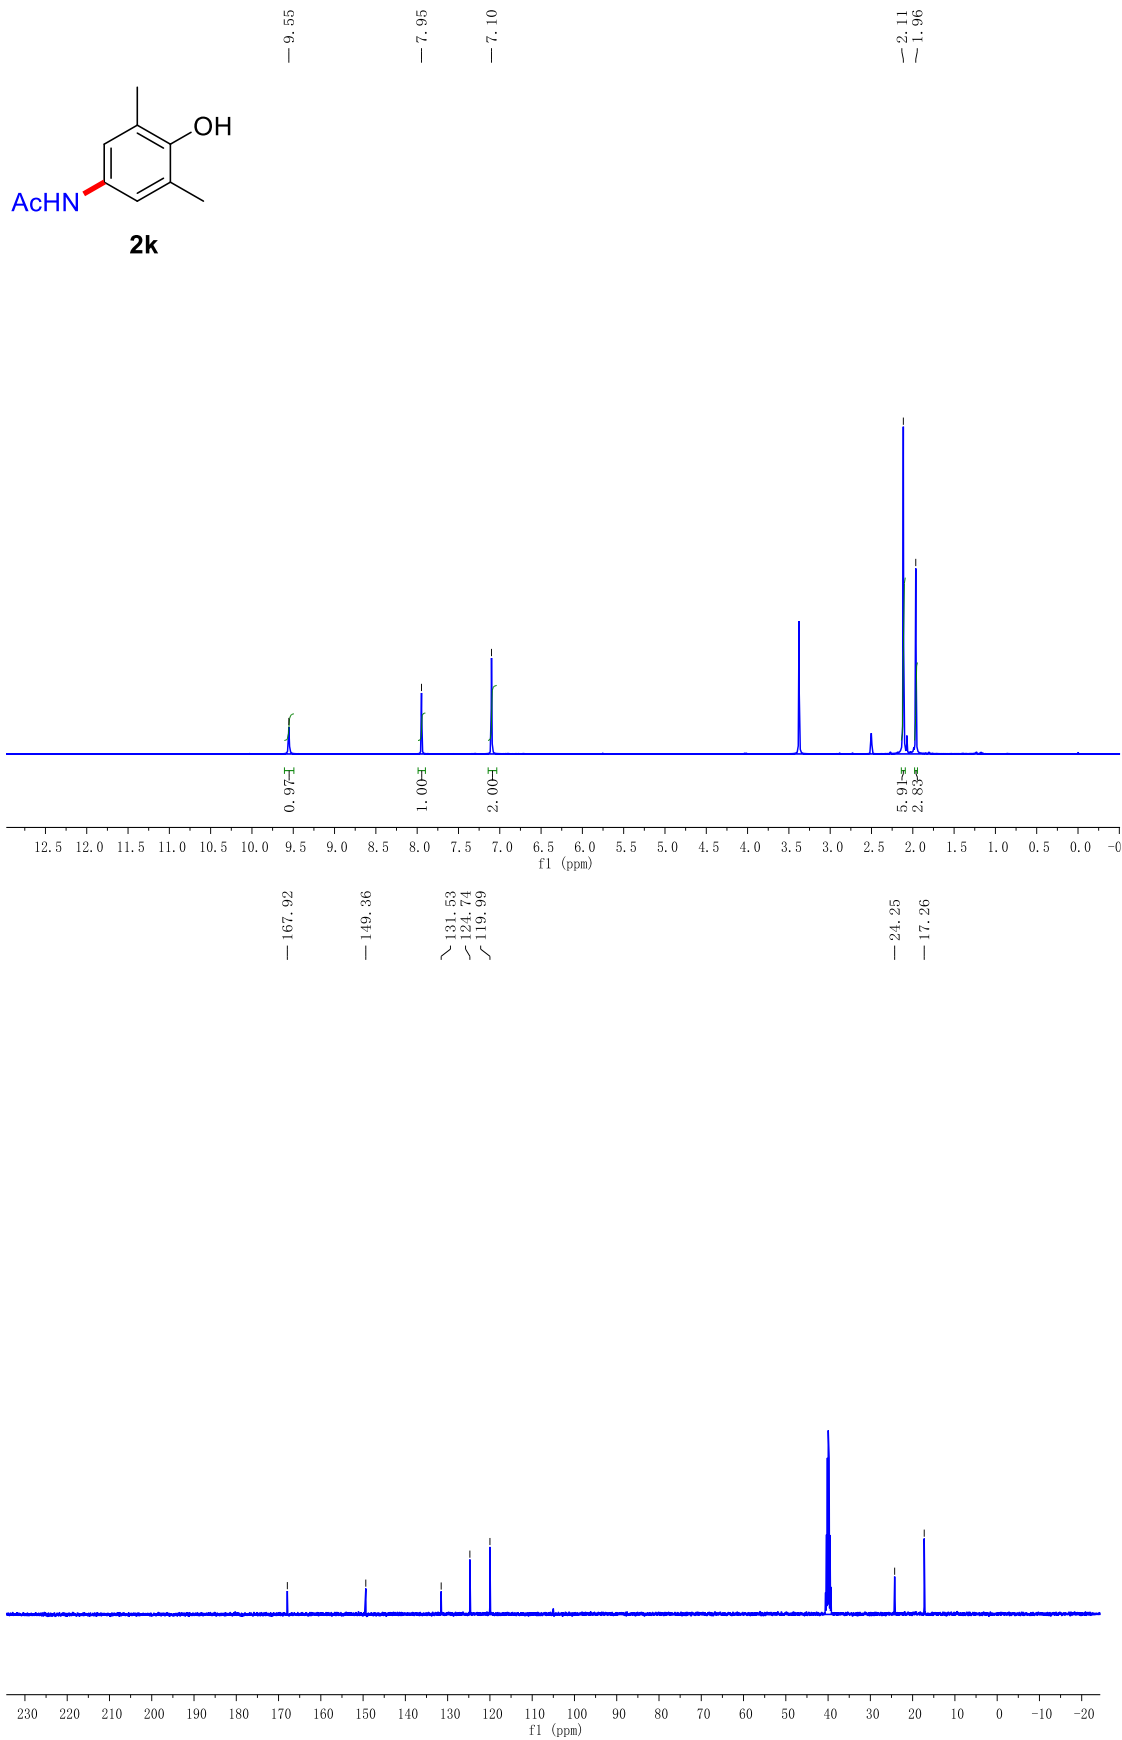

**Supplementary Figure 40.** <sup>1</sup>H and <sup>13</sup>C NMR spectra for compound **2k**

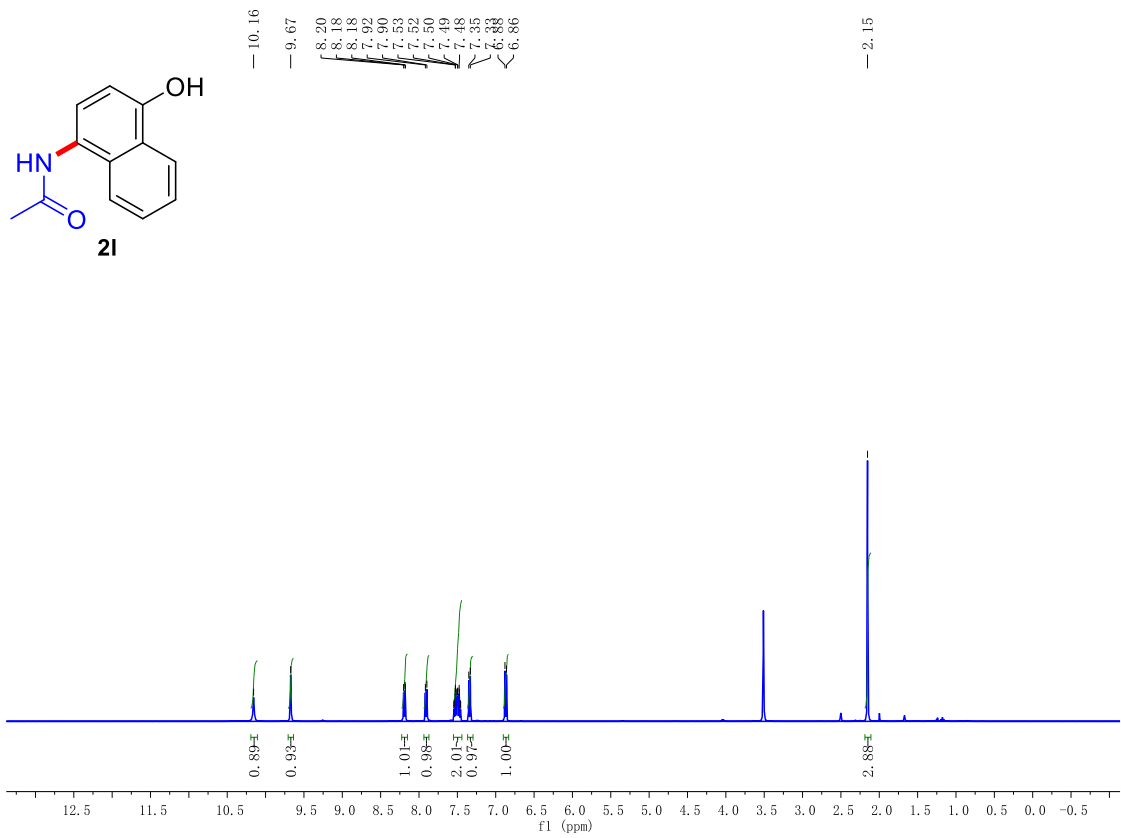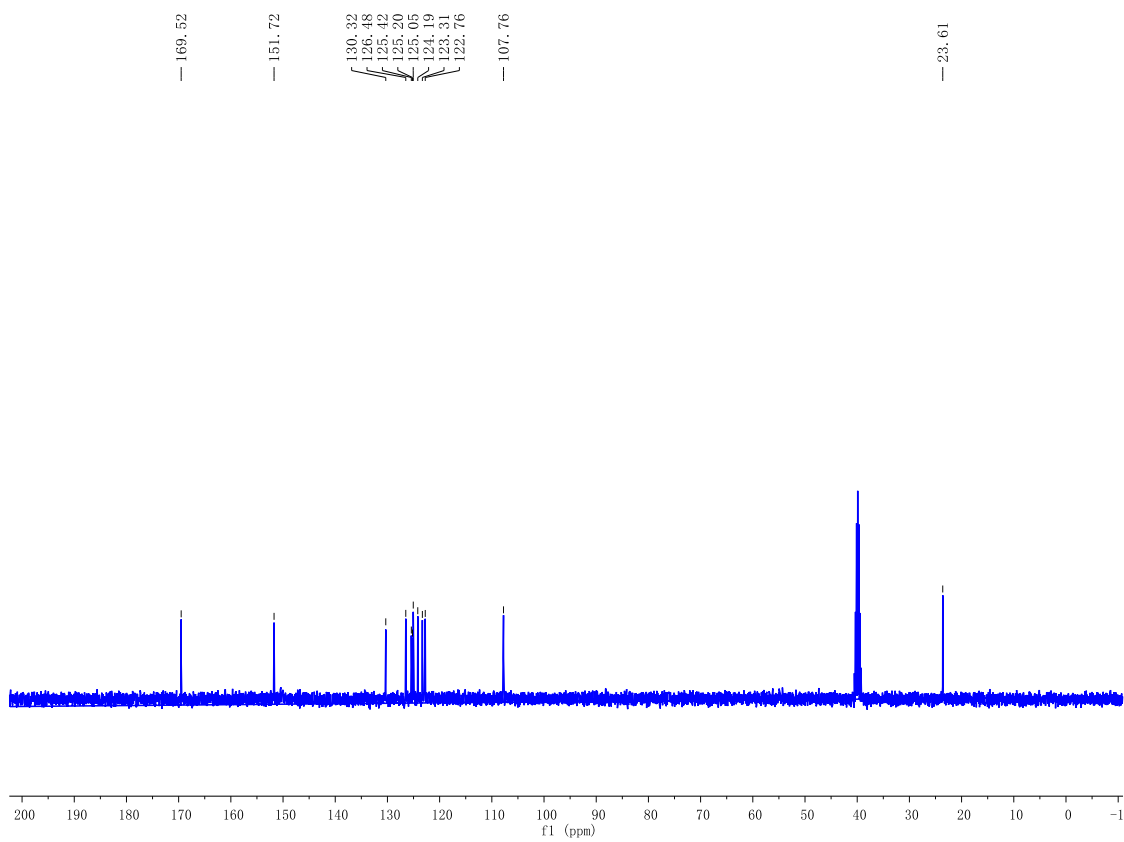

**Supplementary Figure 41.**  $^1\text{H}$  and  $^{13}\text{C}$  NMR spectra for compound **21**

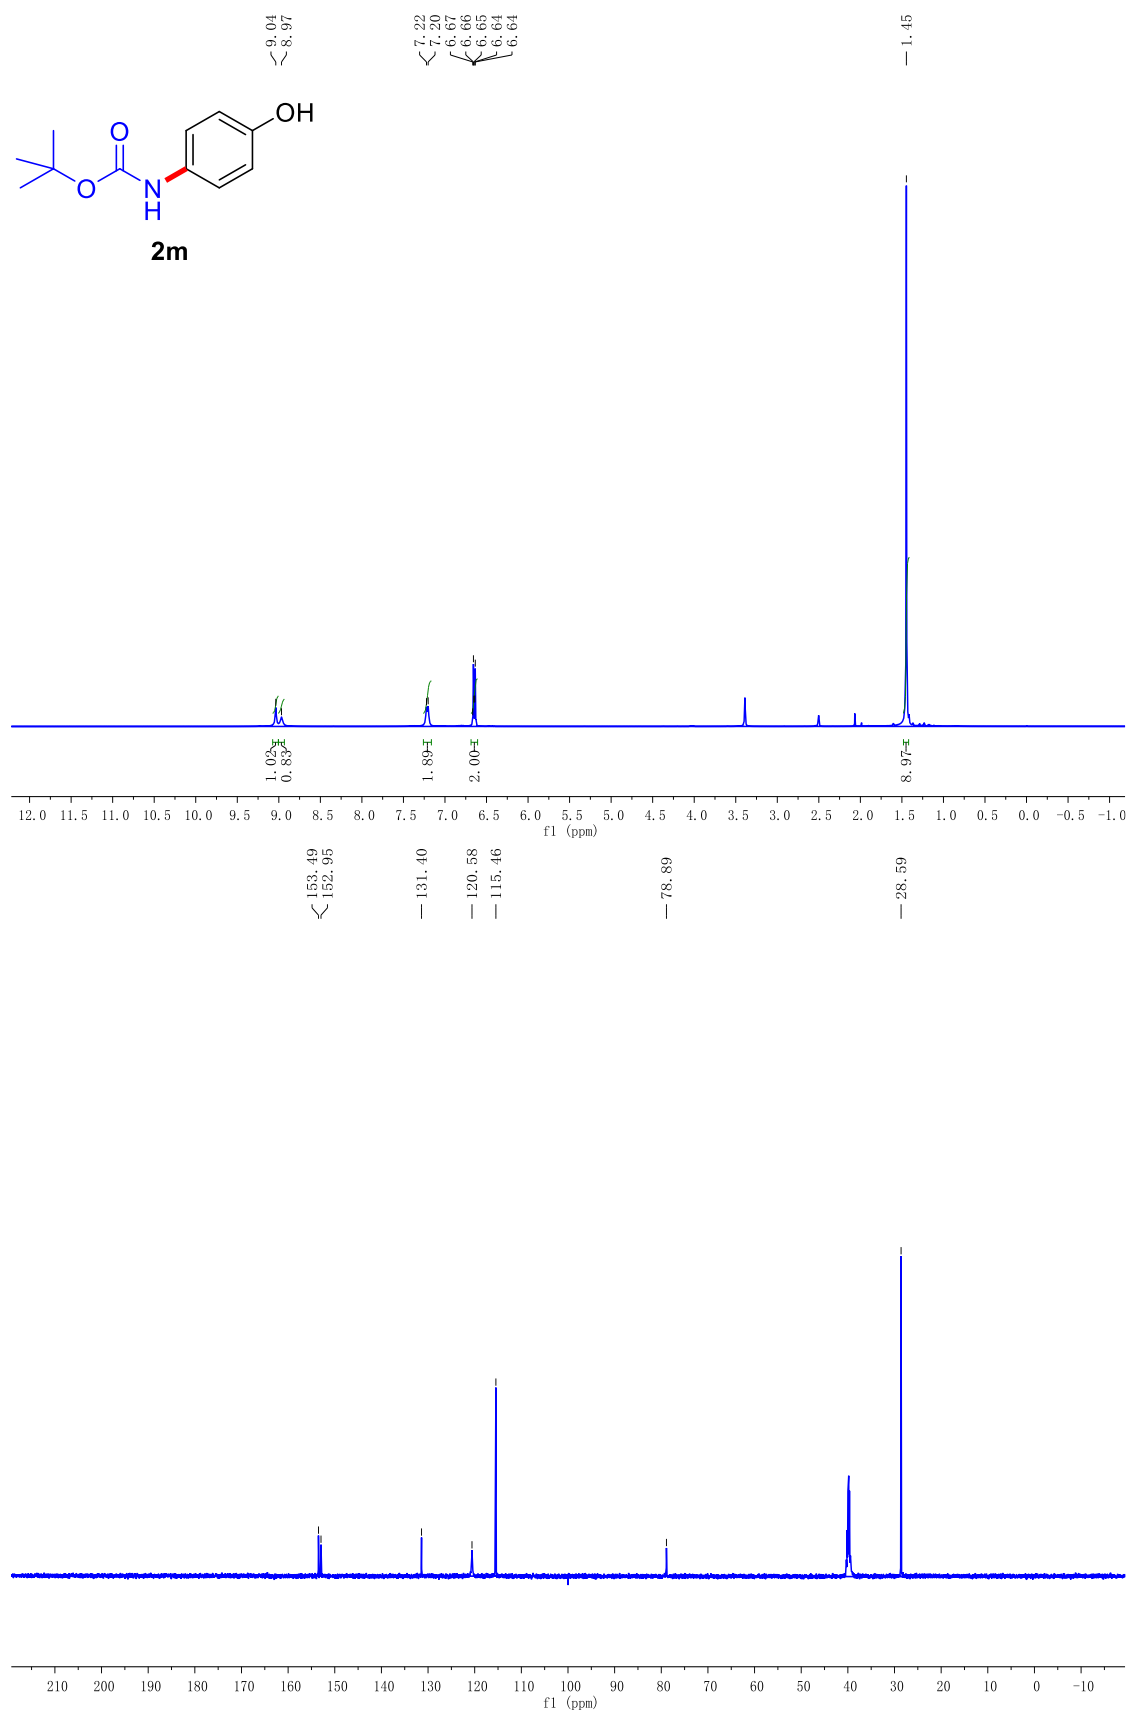

Supplementary Figure 42. <sup>1</sup>H and <sup>13</sup>C NMR spectra for compound **2m**

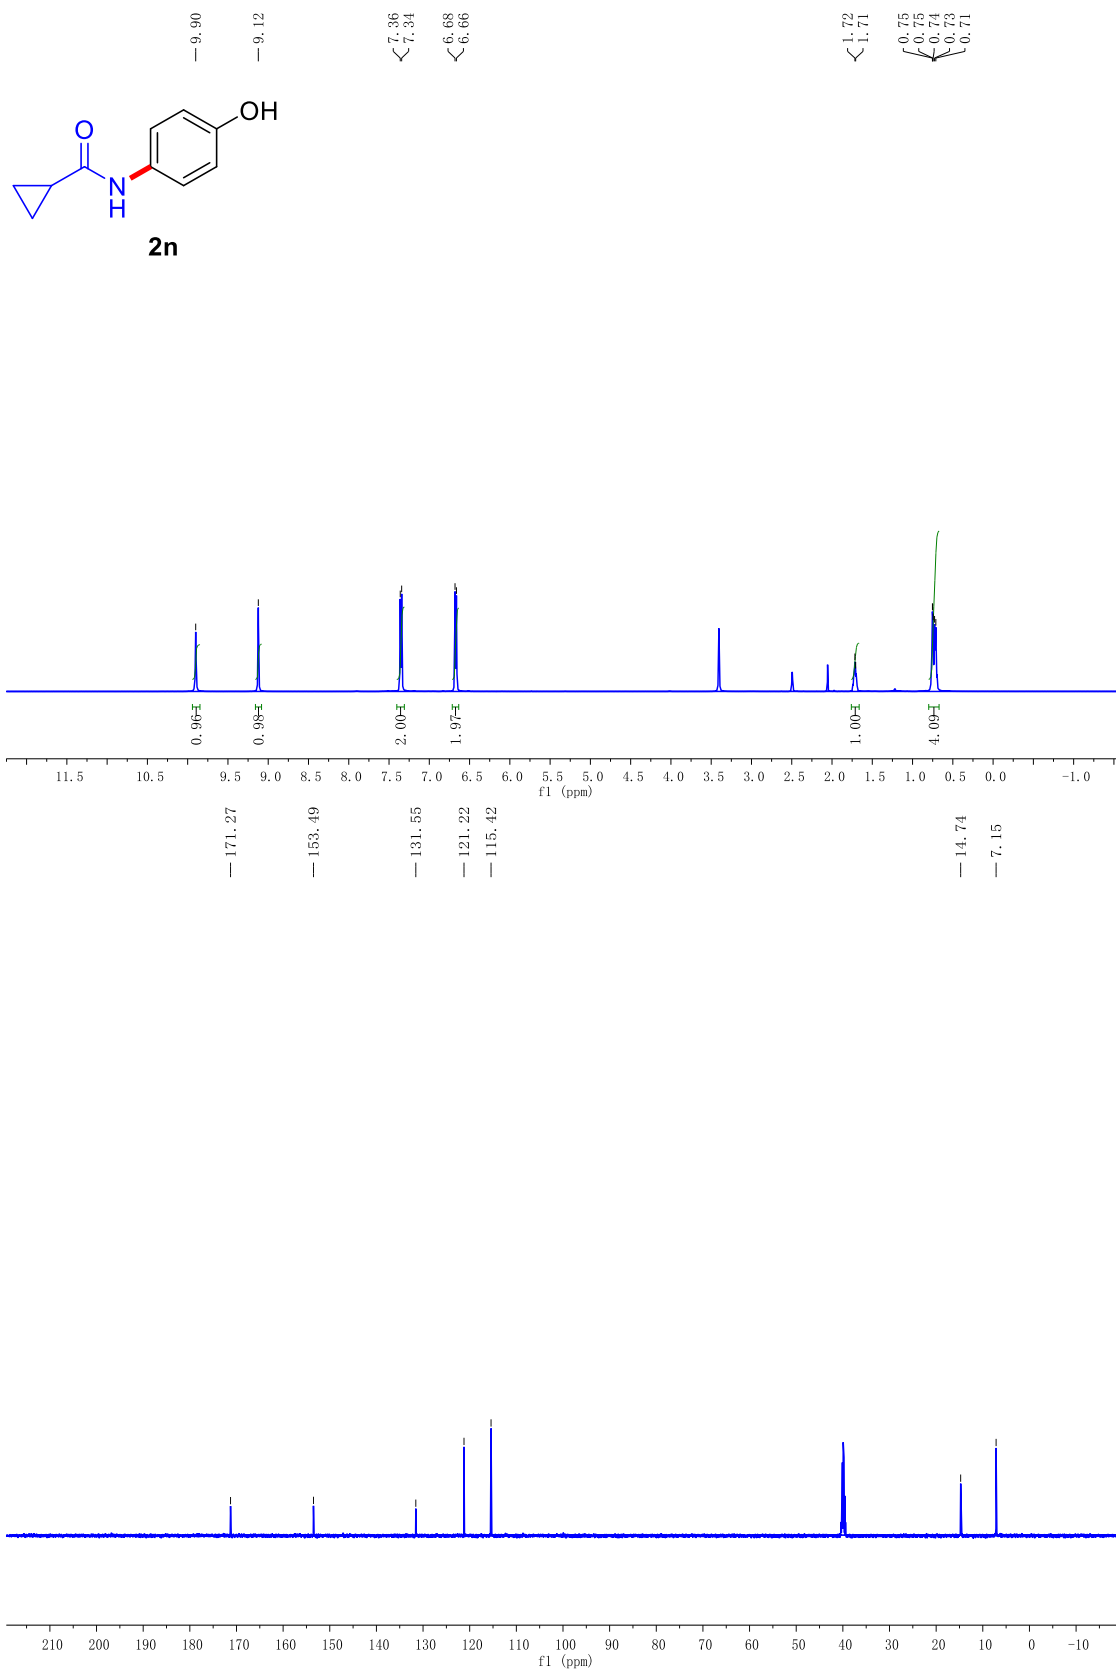

**Supplementary Figure 43.** <sup>1</sup>H and <sup>13</sup>C NMR spectra for compound **2n**

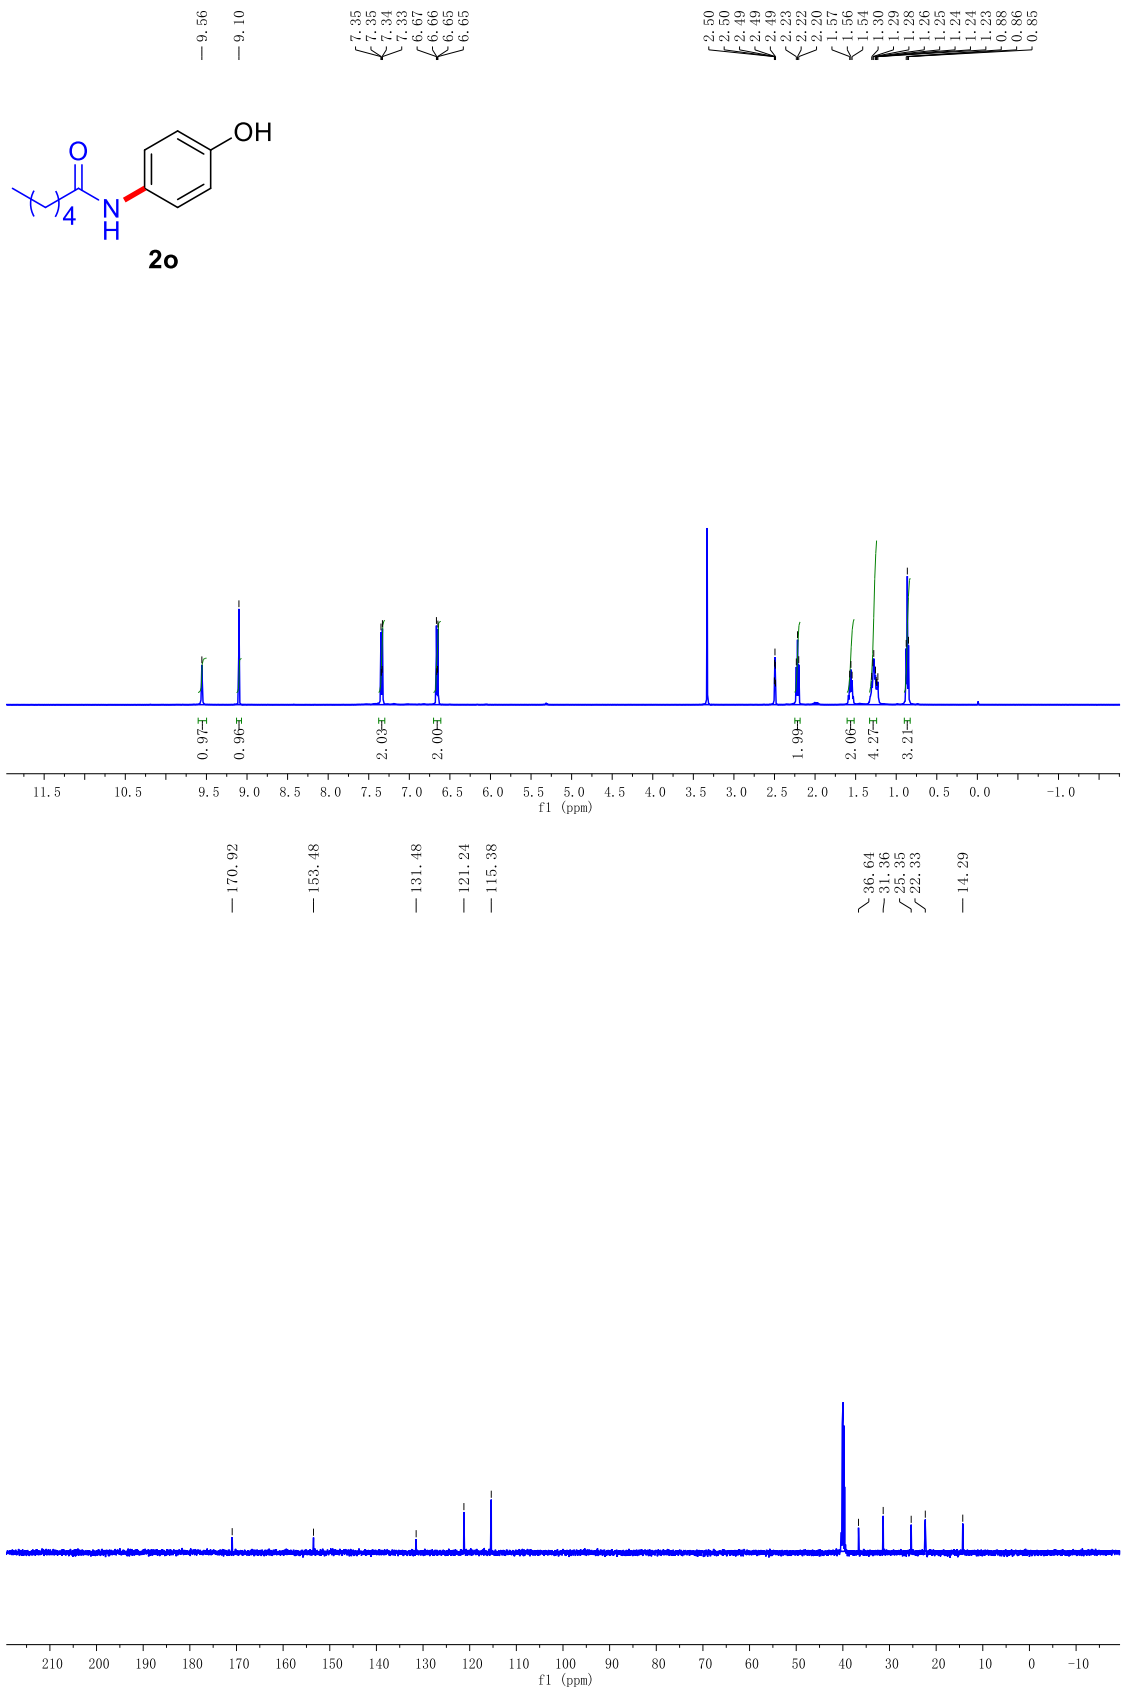

Supplementary Figure 44. <sup>1</sup>H and <sup>13</sup>C NMR spectra for compound **2o**

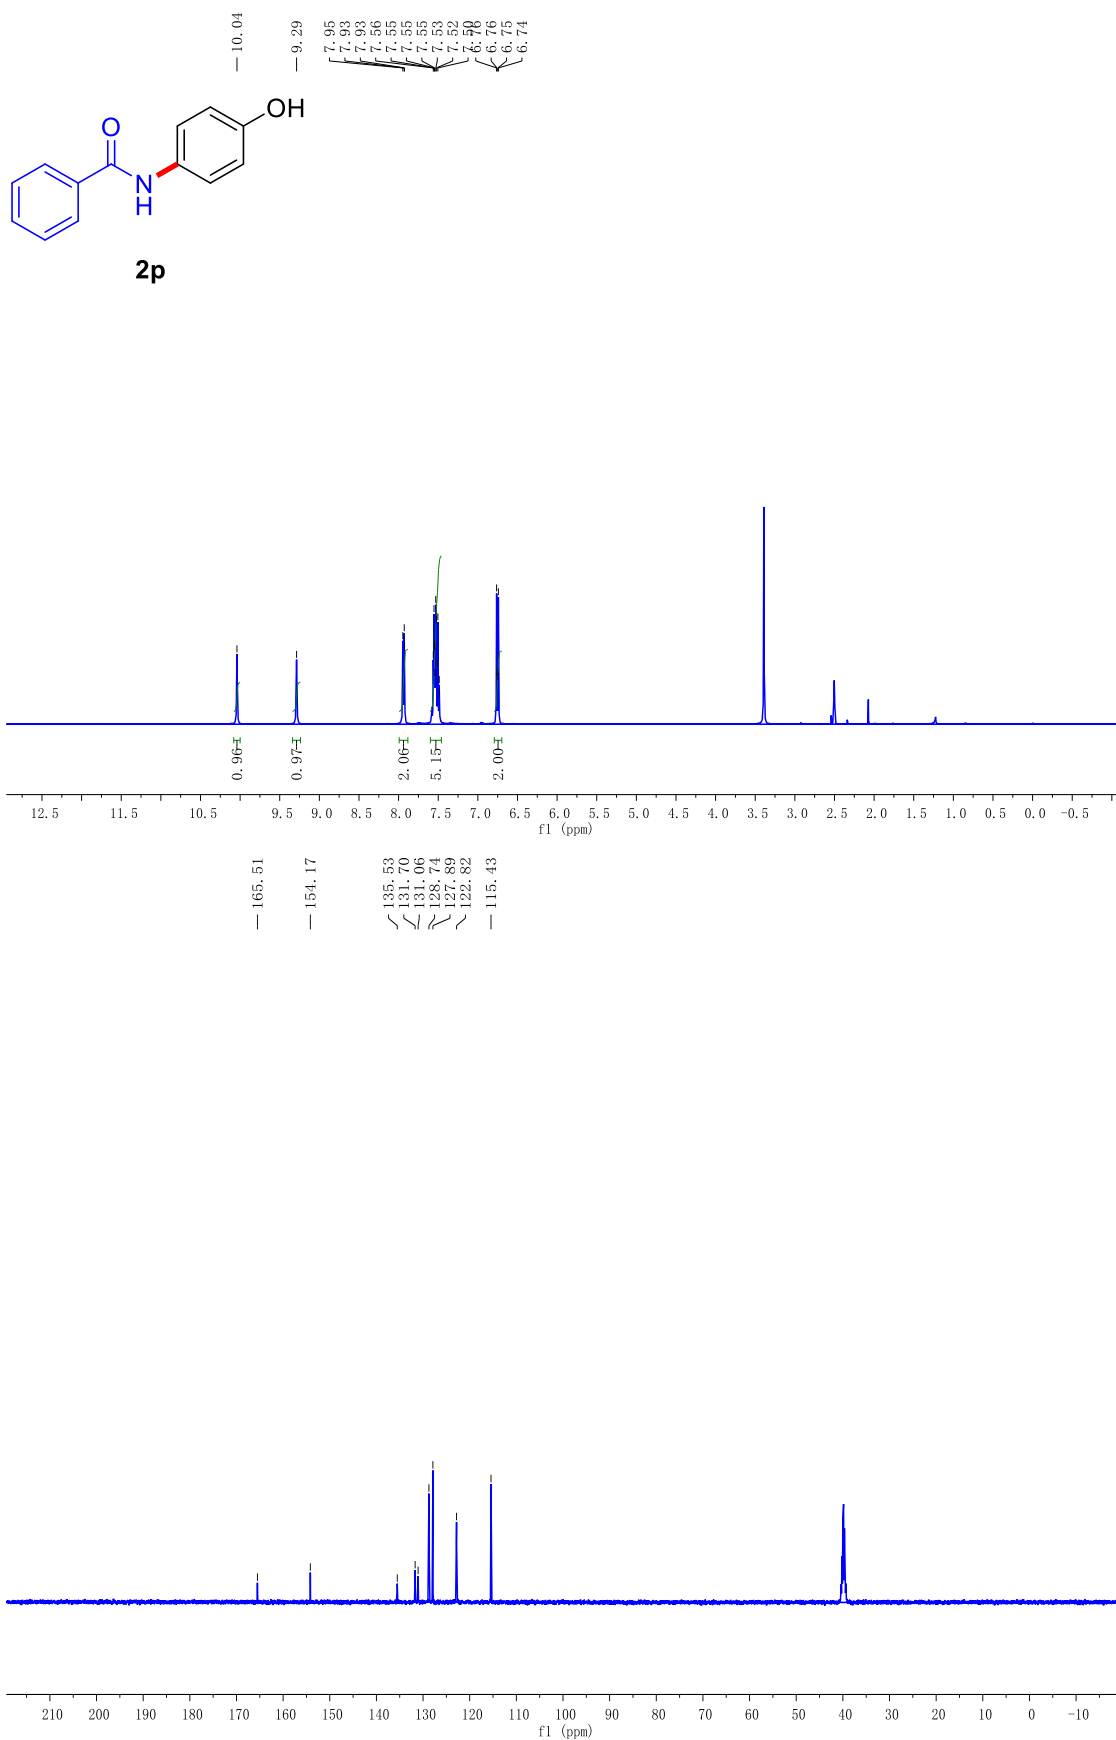

Supplementary Figure 45. <sup>1</sup>H and <sup>13</sup>C NMR spectra for compound **2p**

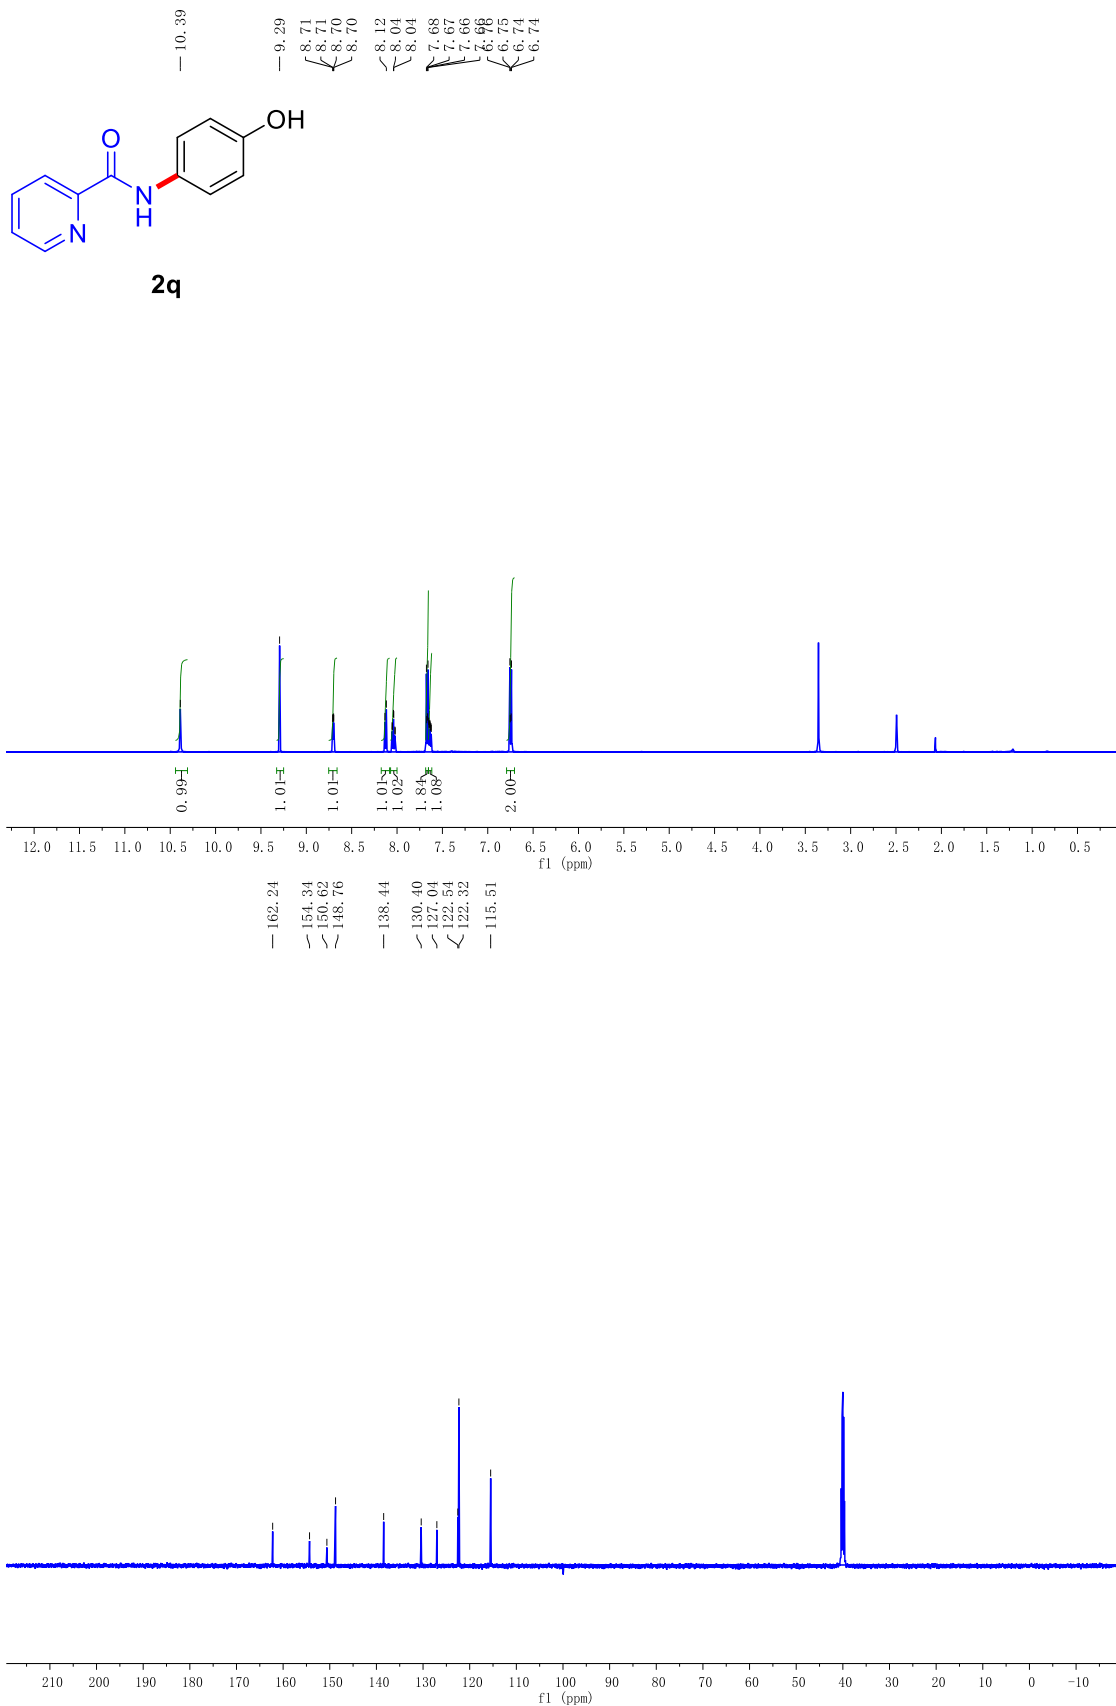

Supplementary Figure 46. <sup>1</sup>H and <sup>13</sup>C NMR spectra for compound **2q**



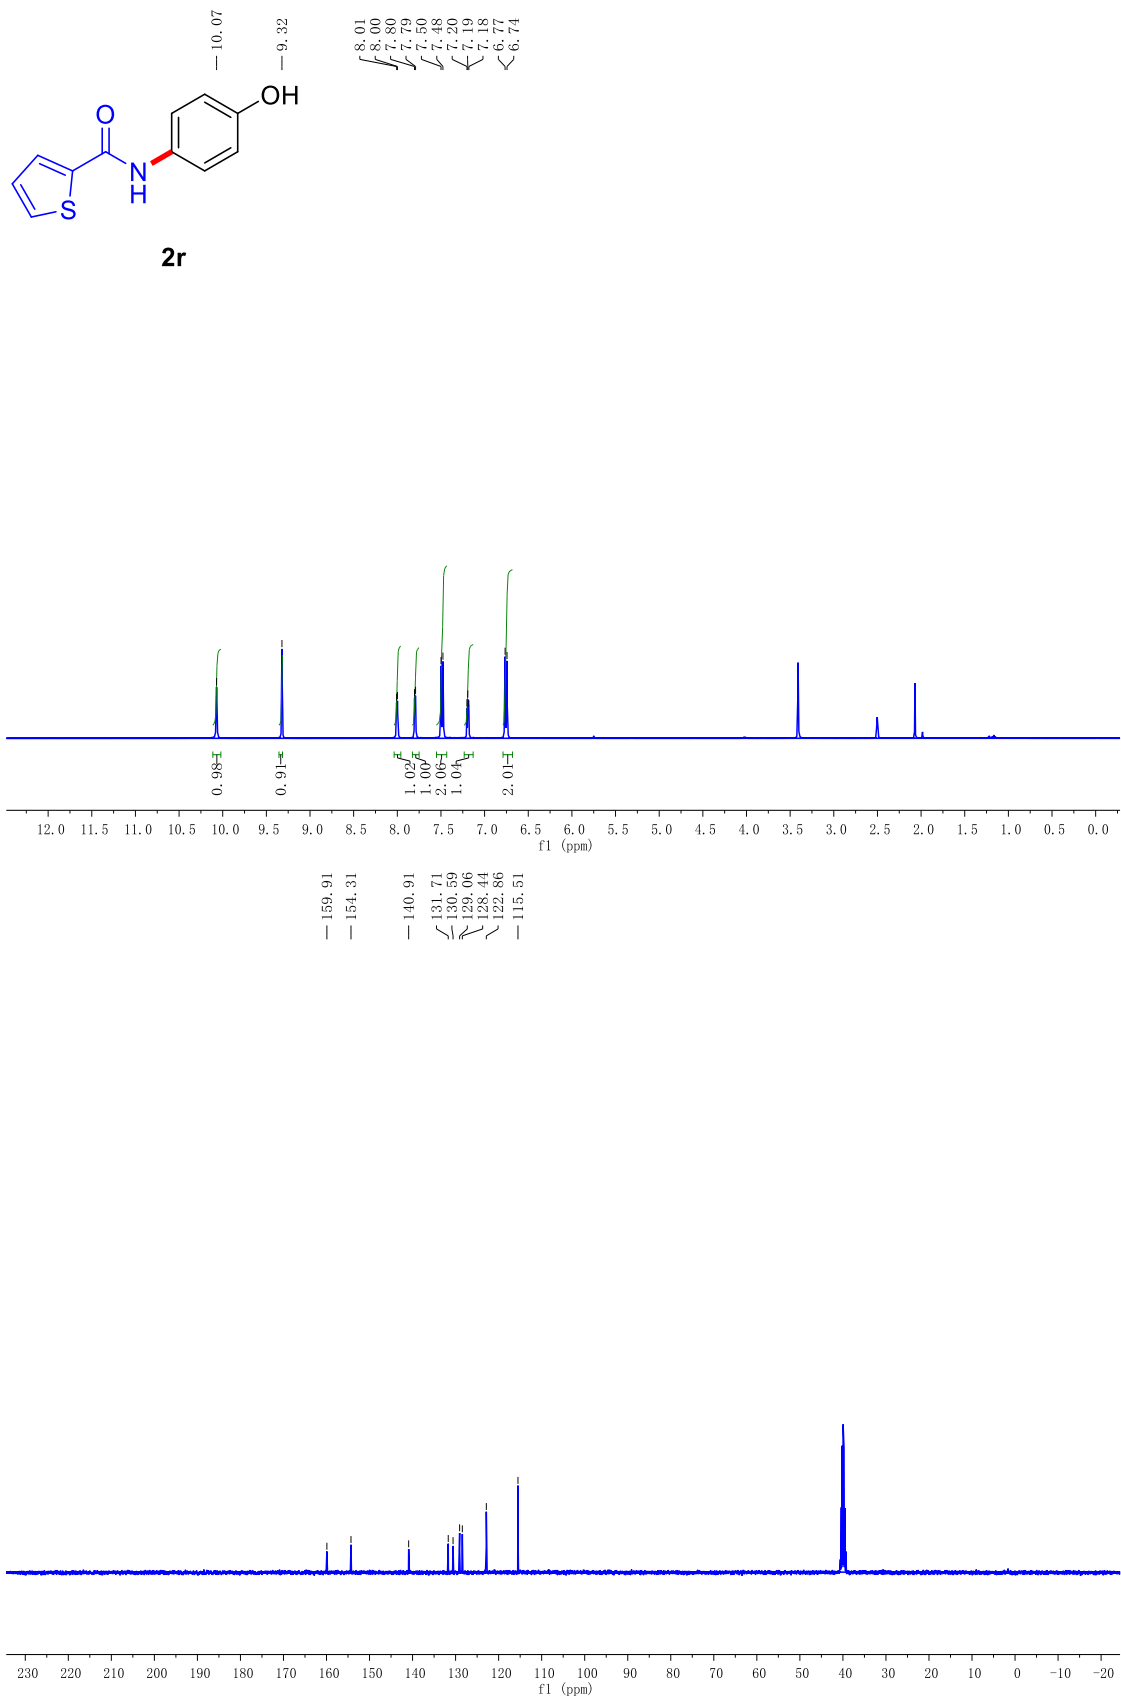

Supplementary Figure 47. <sup>1</sup>H and <sup>13</sup>C NMR spectra for compound **2r**

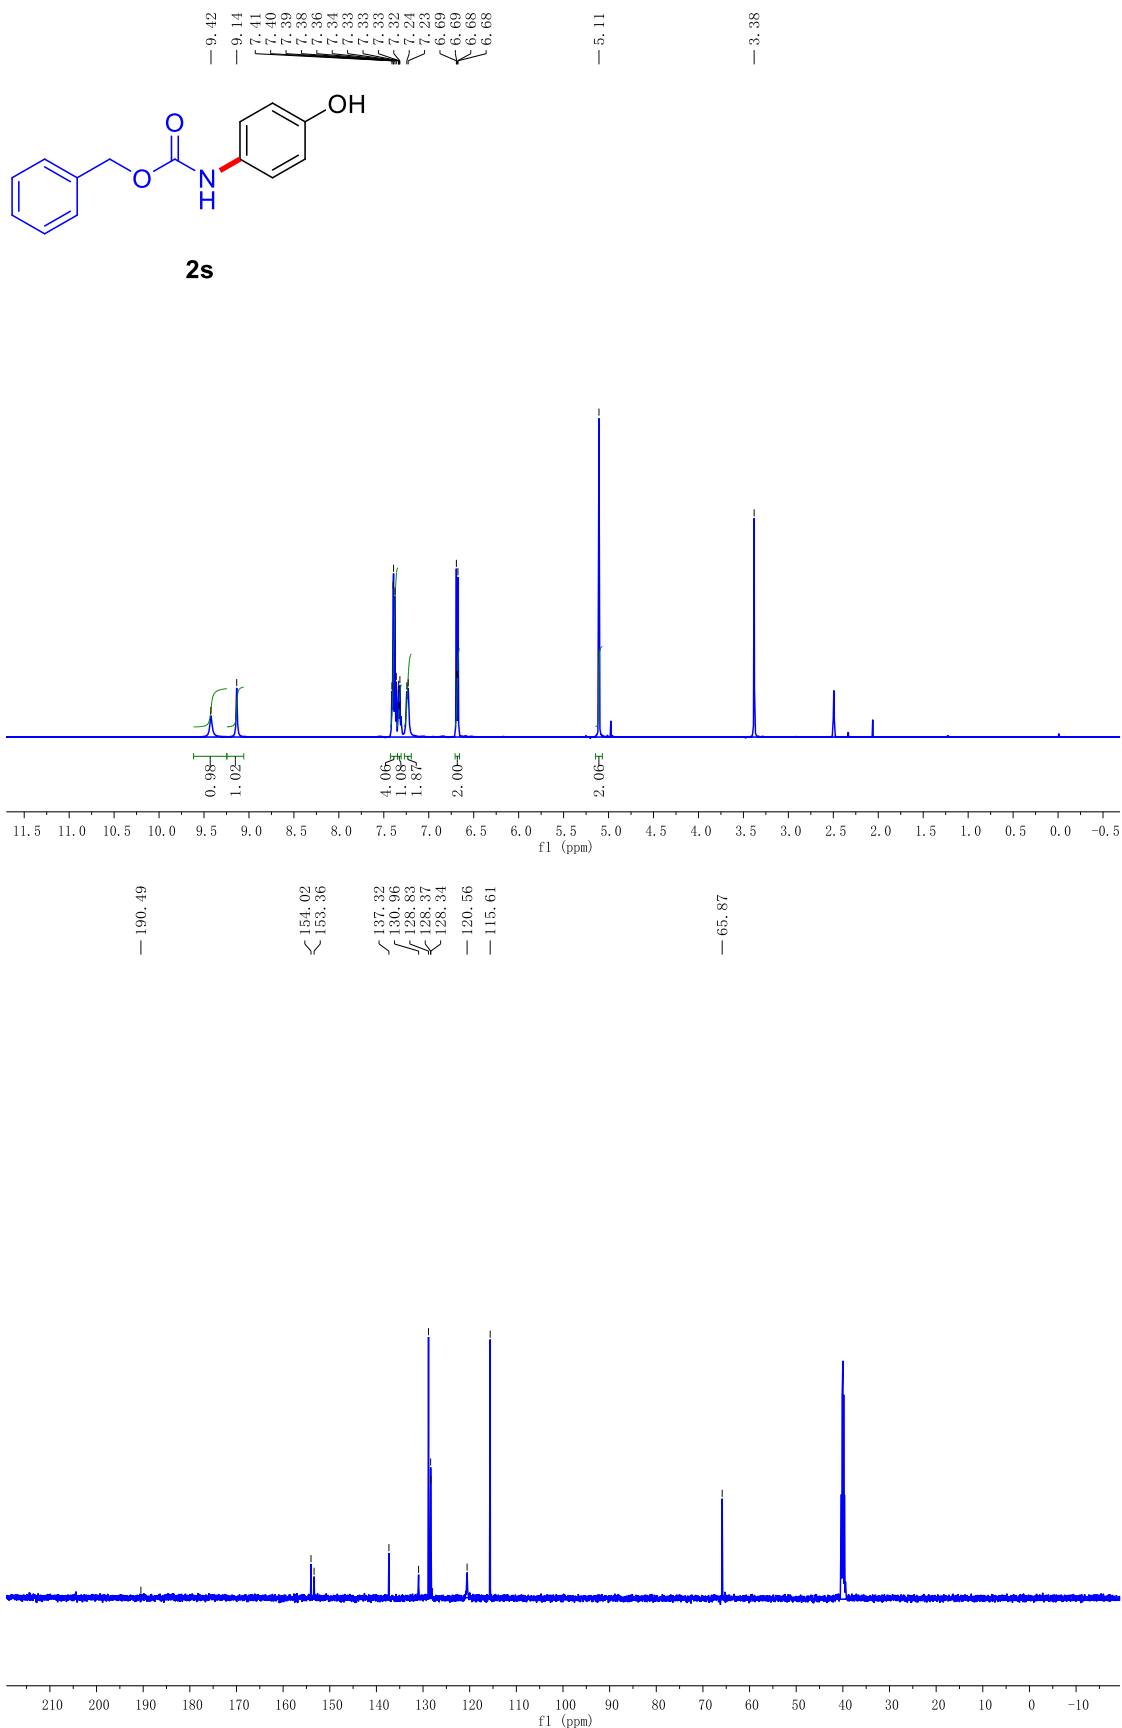

Supplementary Figure 48. <sup>1</sup>H and <sup>13</sup>C NMR spectra for compound **2s**

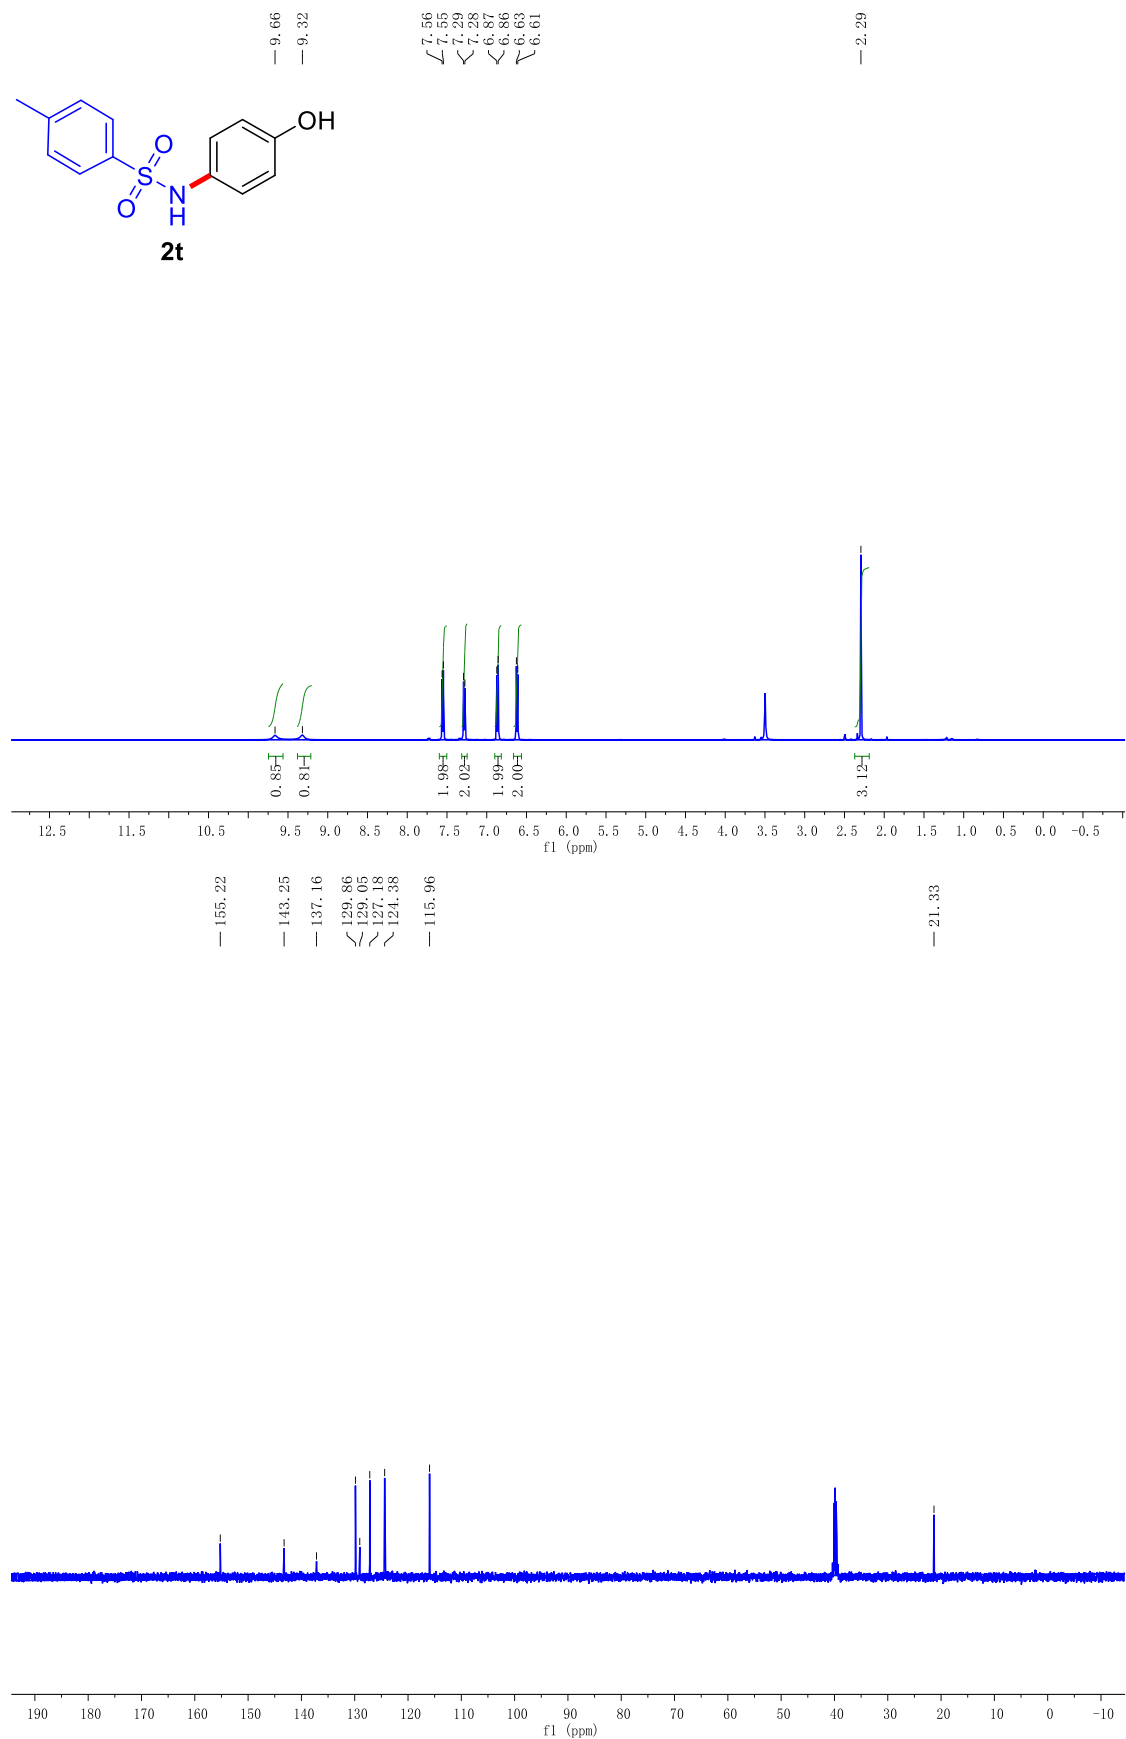

Supplementary Figure 49. <sup>1</sup>H and <sup>13</sup>C NMR spectra for compound **2t**

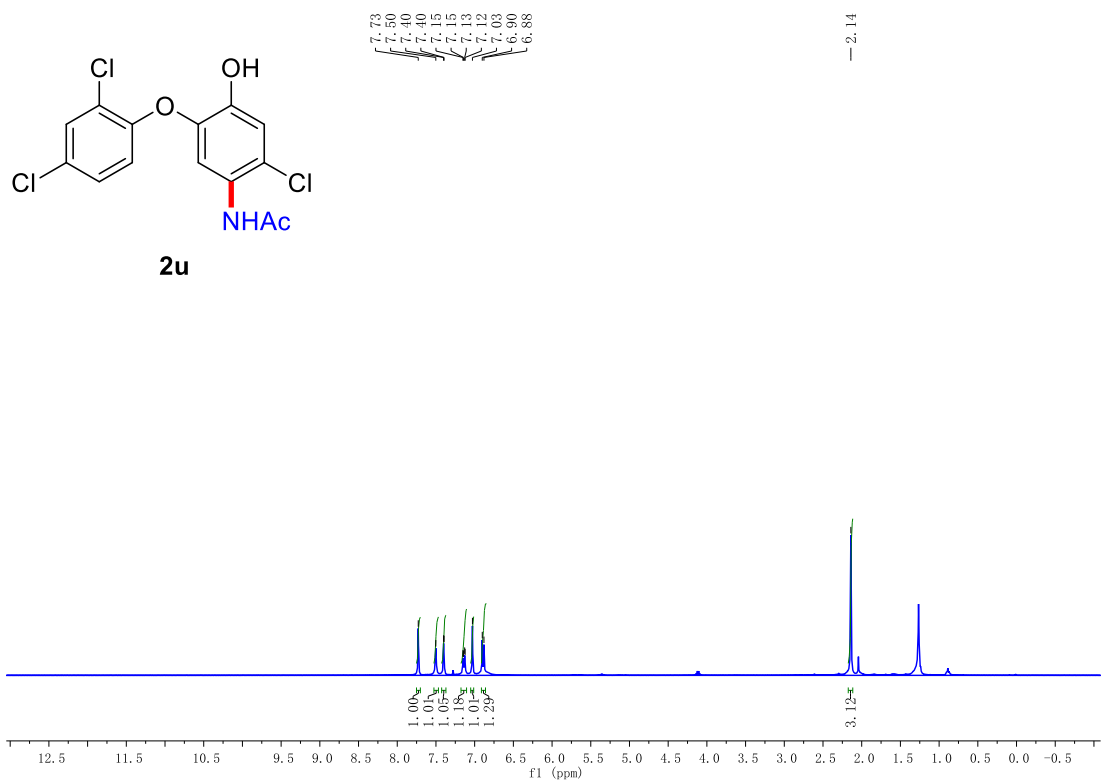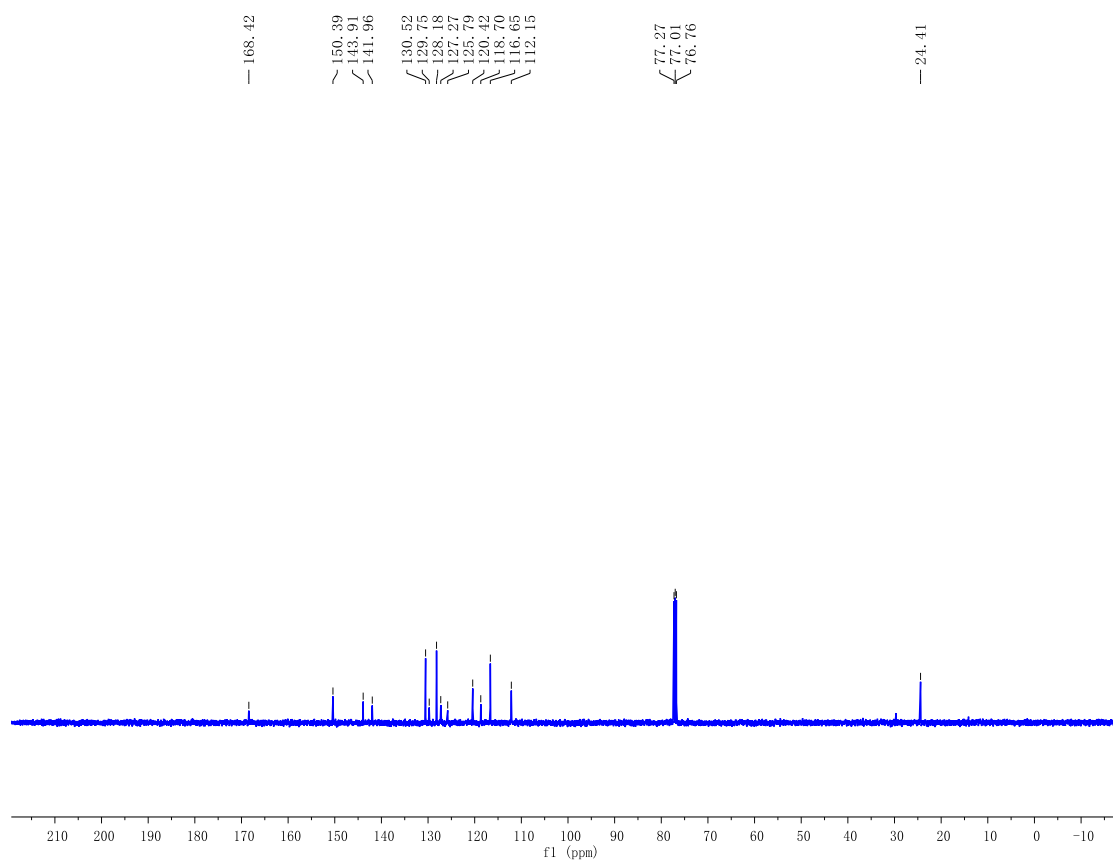

Supplementary Figure 50. <sup>1</sup>H and <sup>13</sup>C NMR spectra for compound **2u**

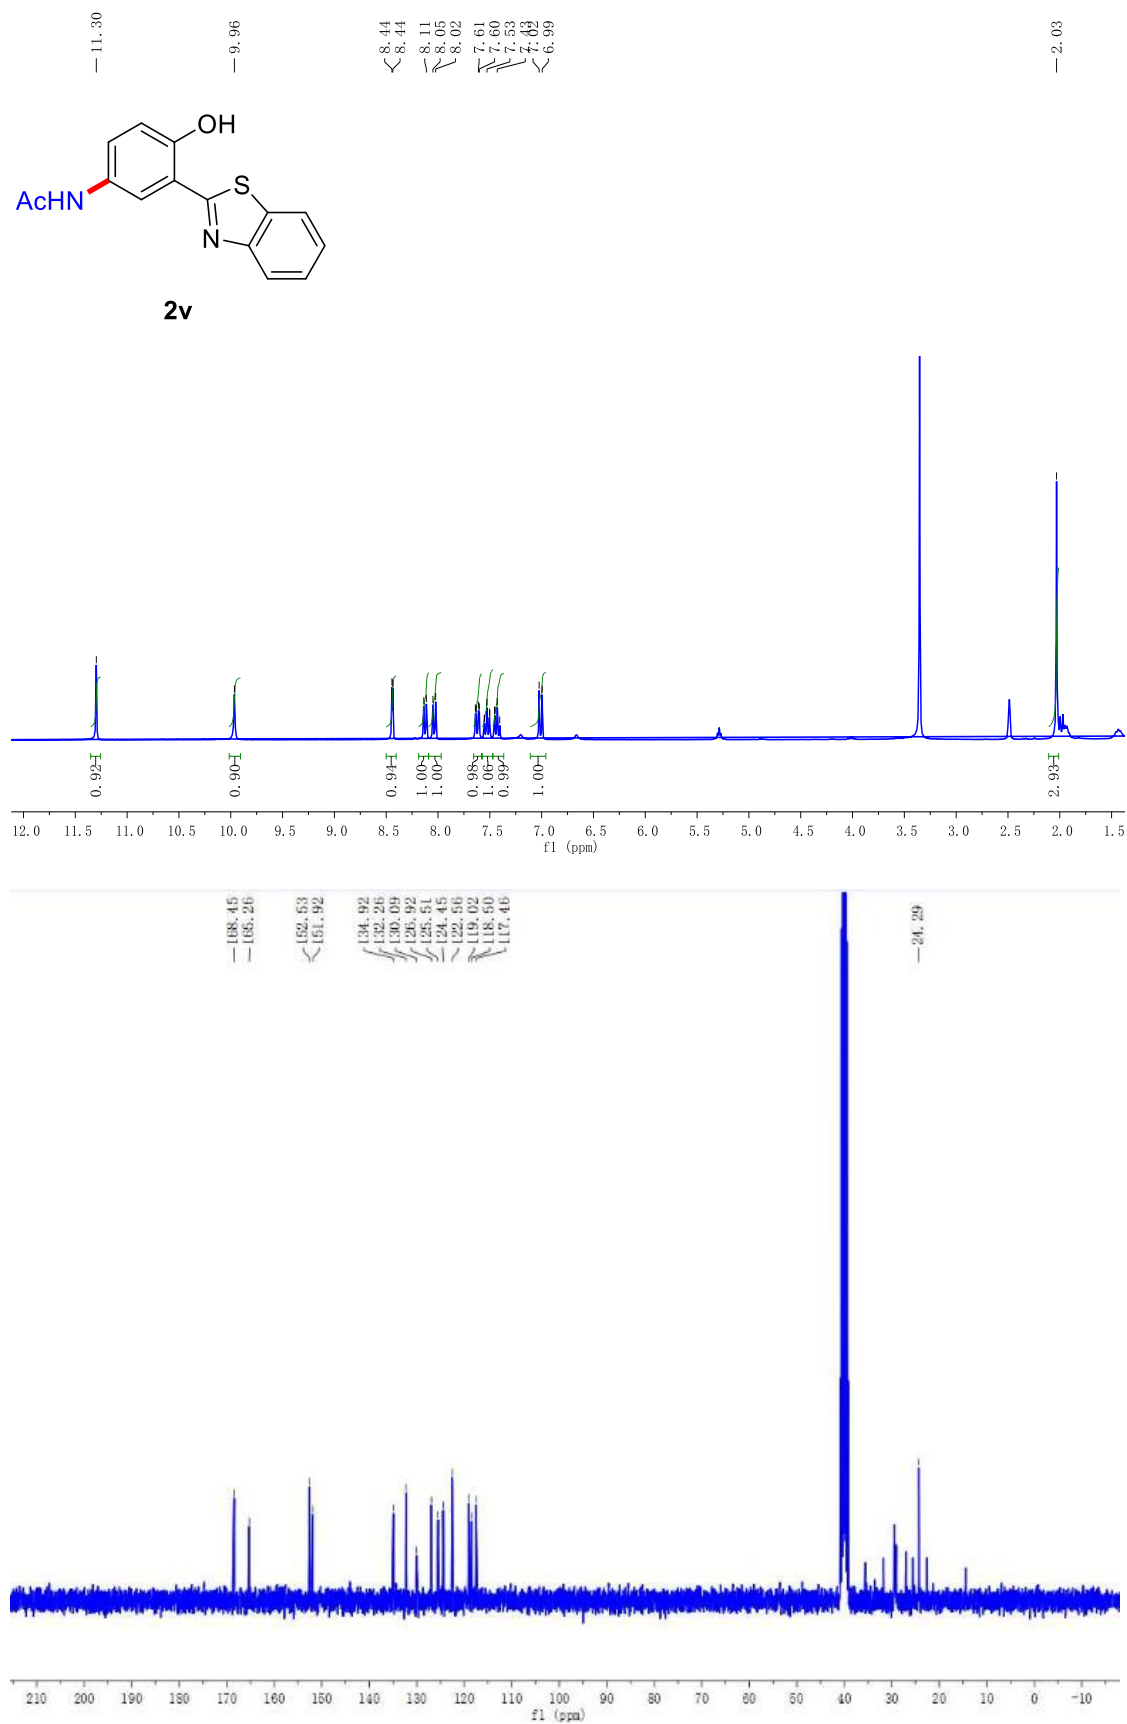

Supplementary Figure 51. <sup>1</sup>H and <sup>13</sup>C NMR spectra for compound **2v**

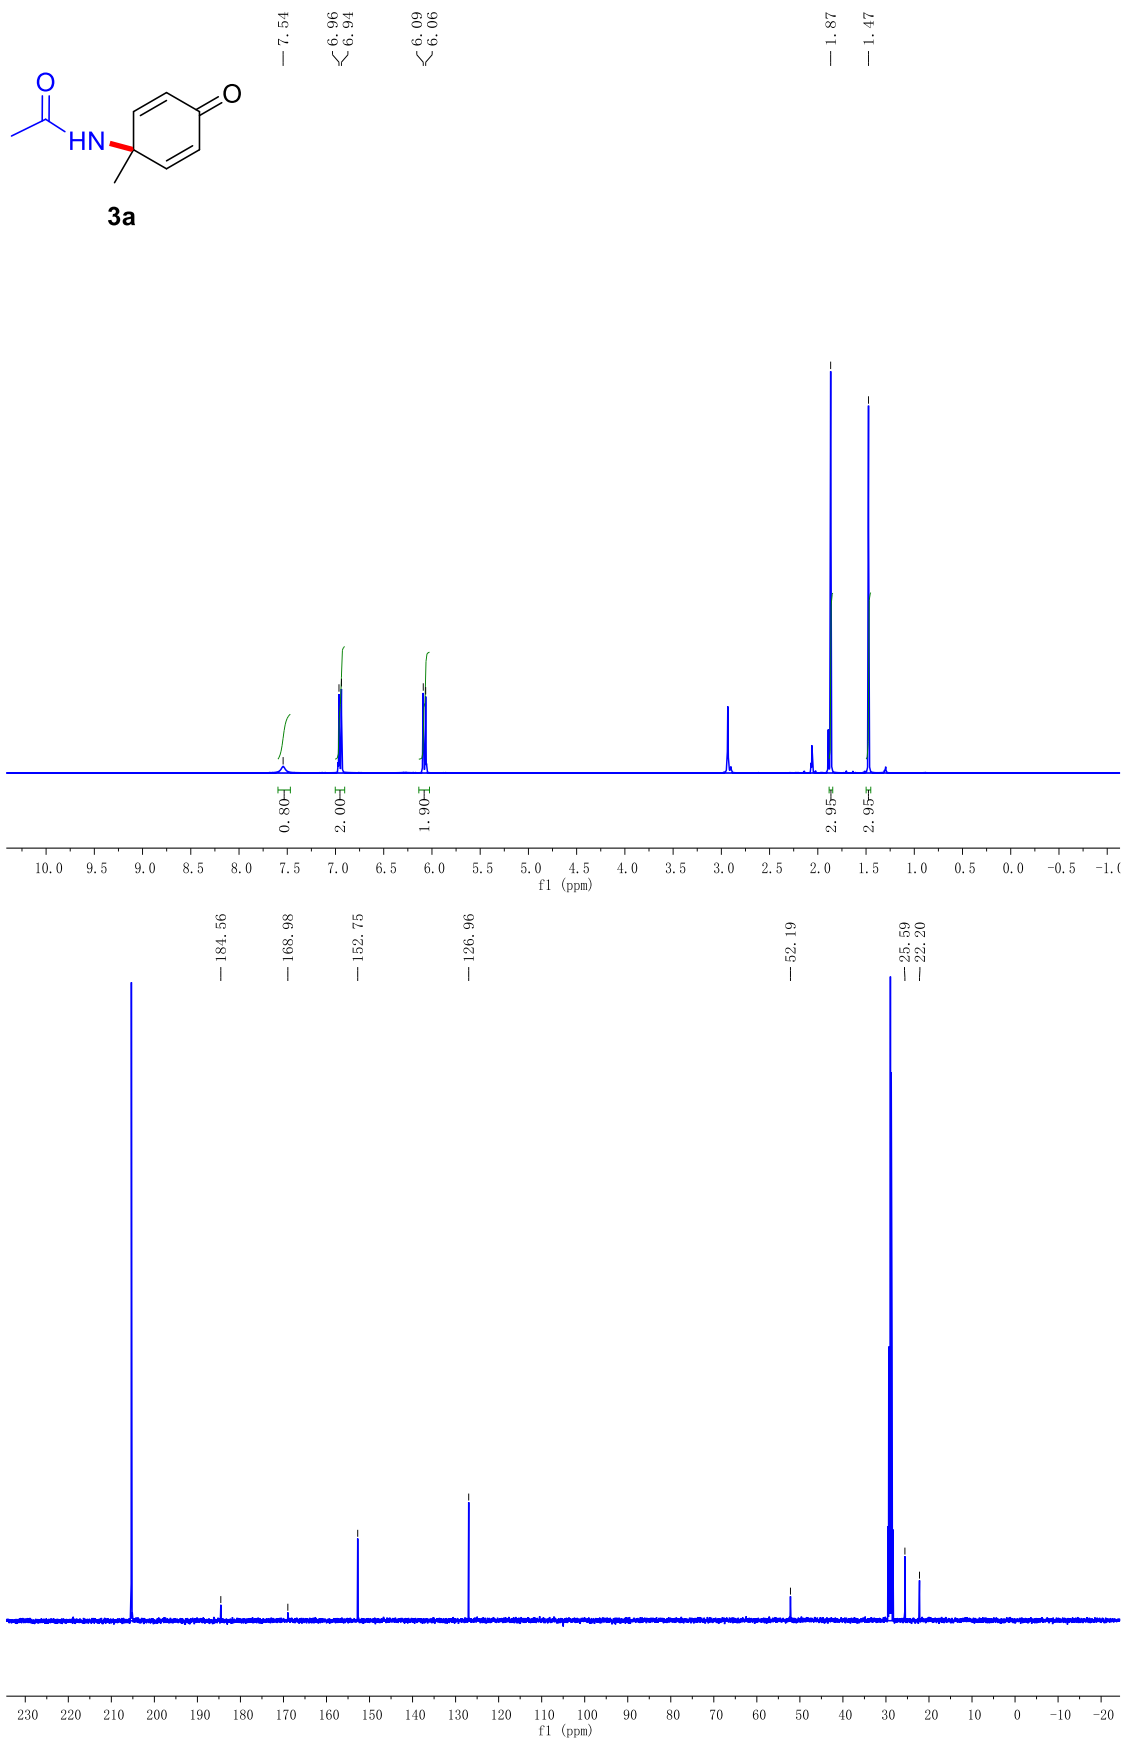

Supplementary Figure 52. <sup>1</sup>H and <sup>13</sup>C NMR spectra for compound **3a**

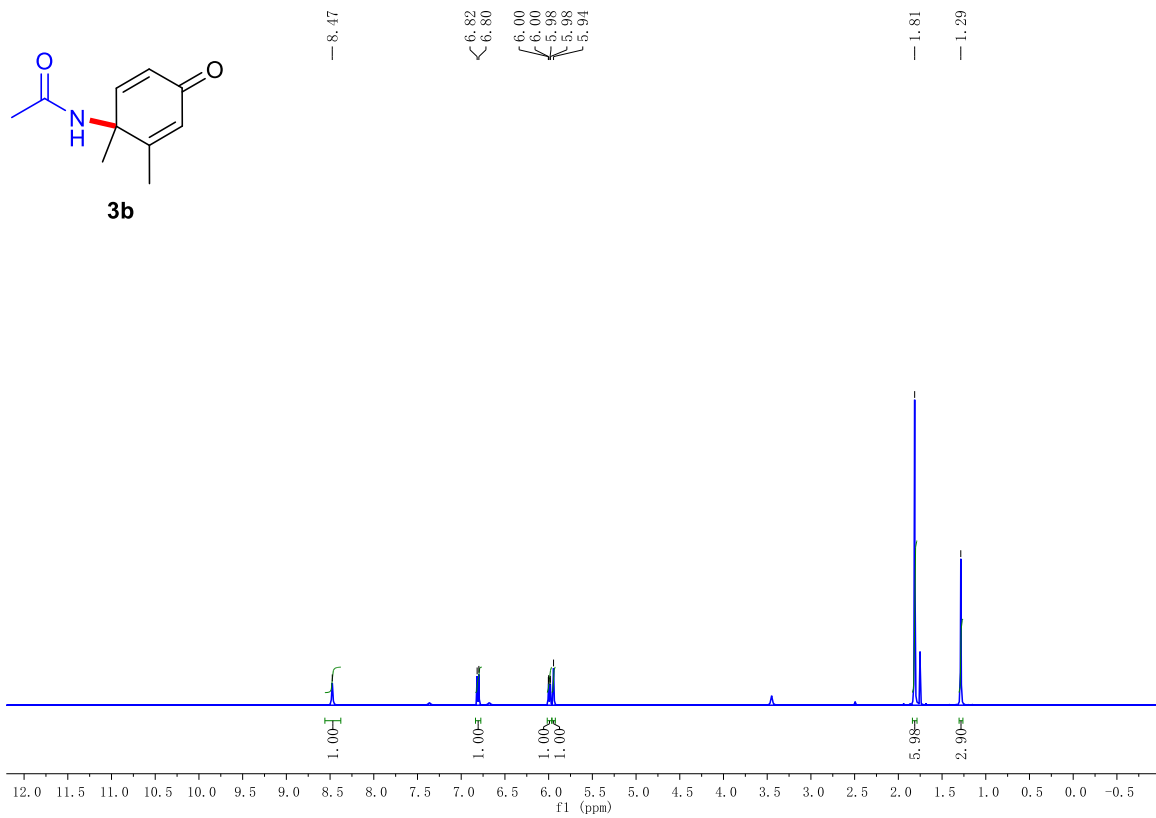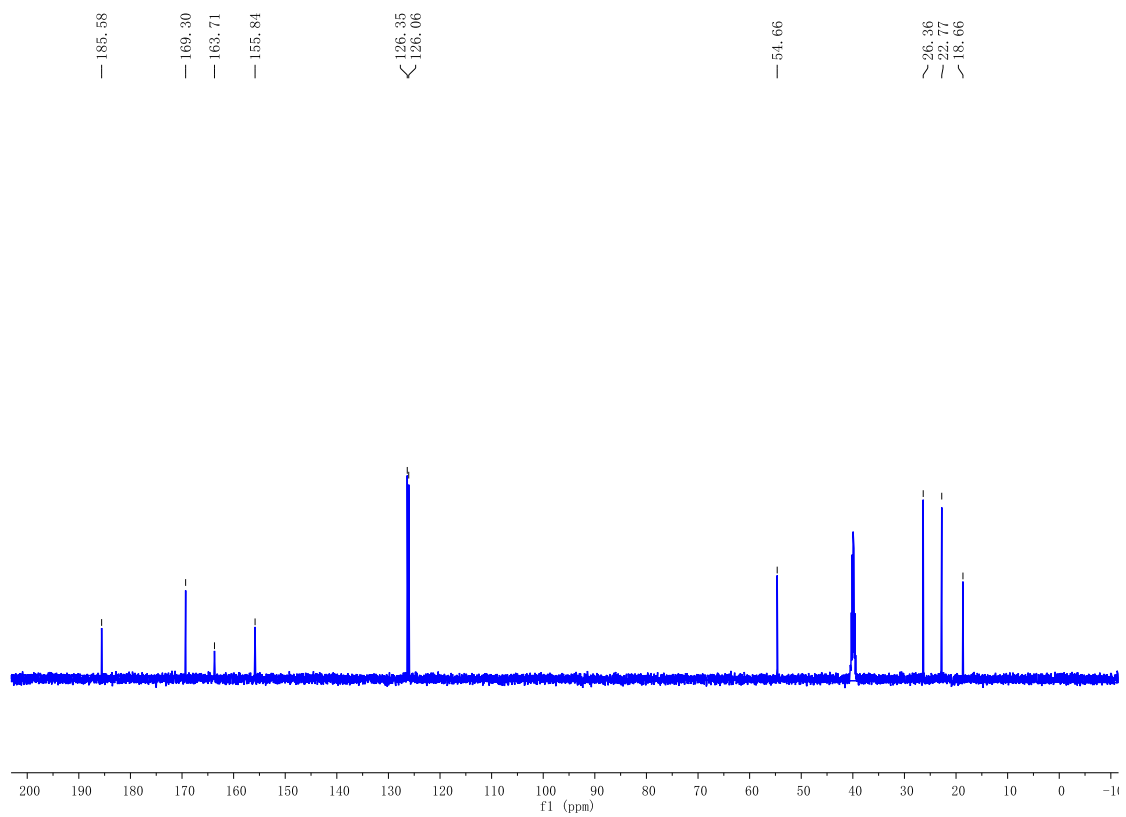

**Supplementary Figure 53.**  $^1\text{H}$  and  $^{13}\text{C}$  NMR spectra for compound **3b**

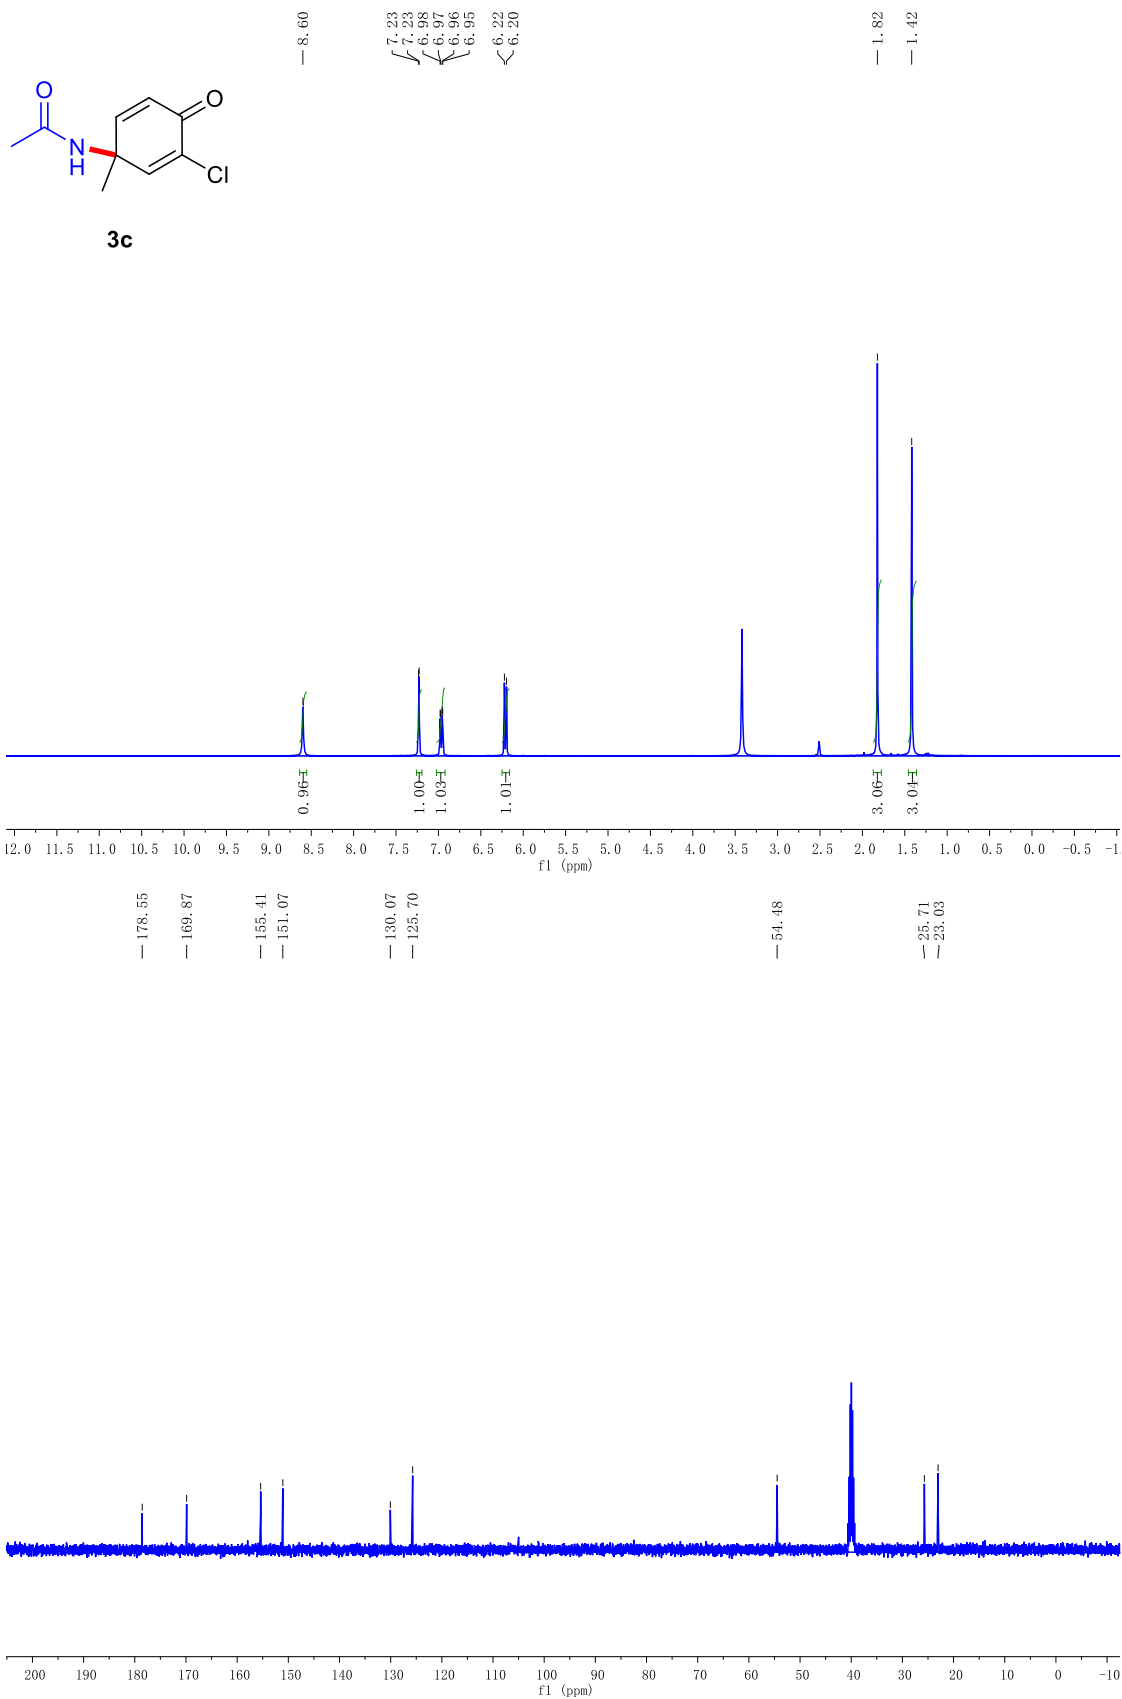

**Supplementary Figure 54.** <sup>1</sup>H and <sup>13</sup>C NMR spectra for compound **3c**



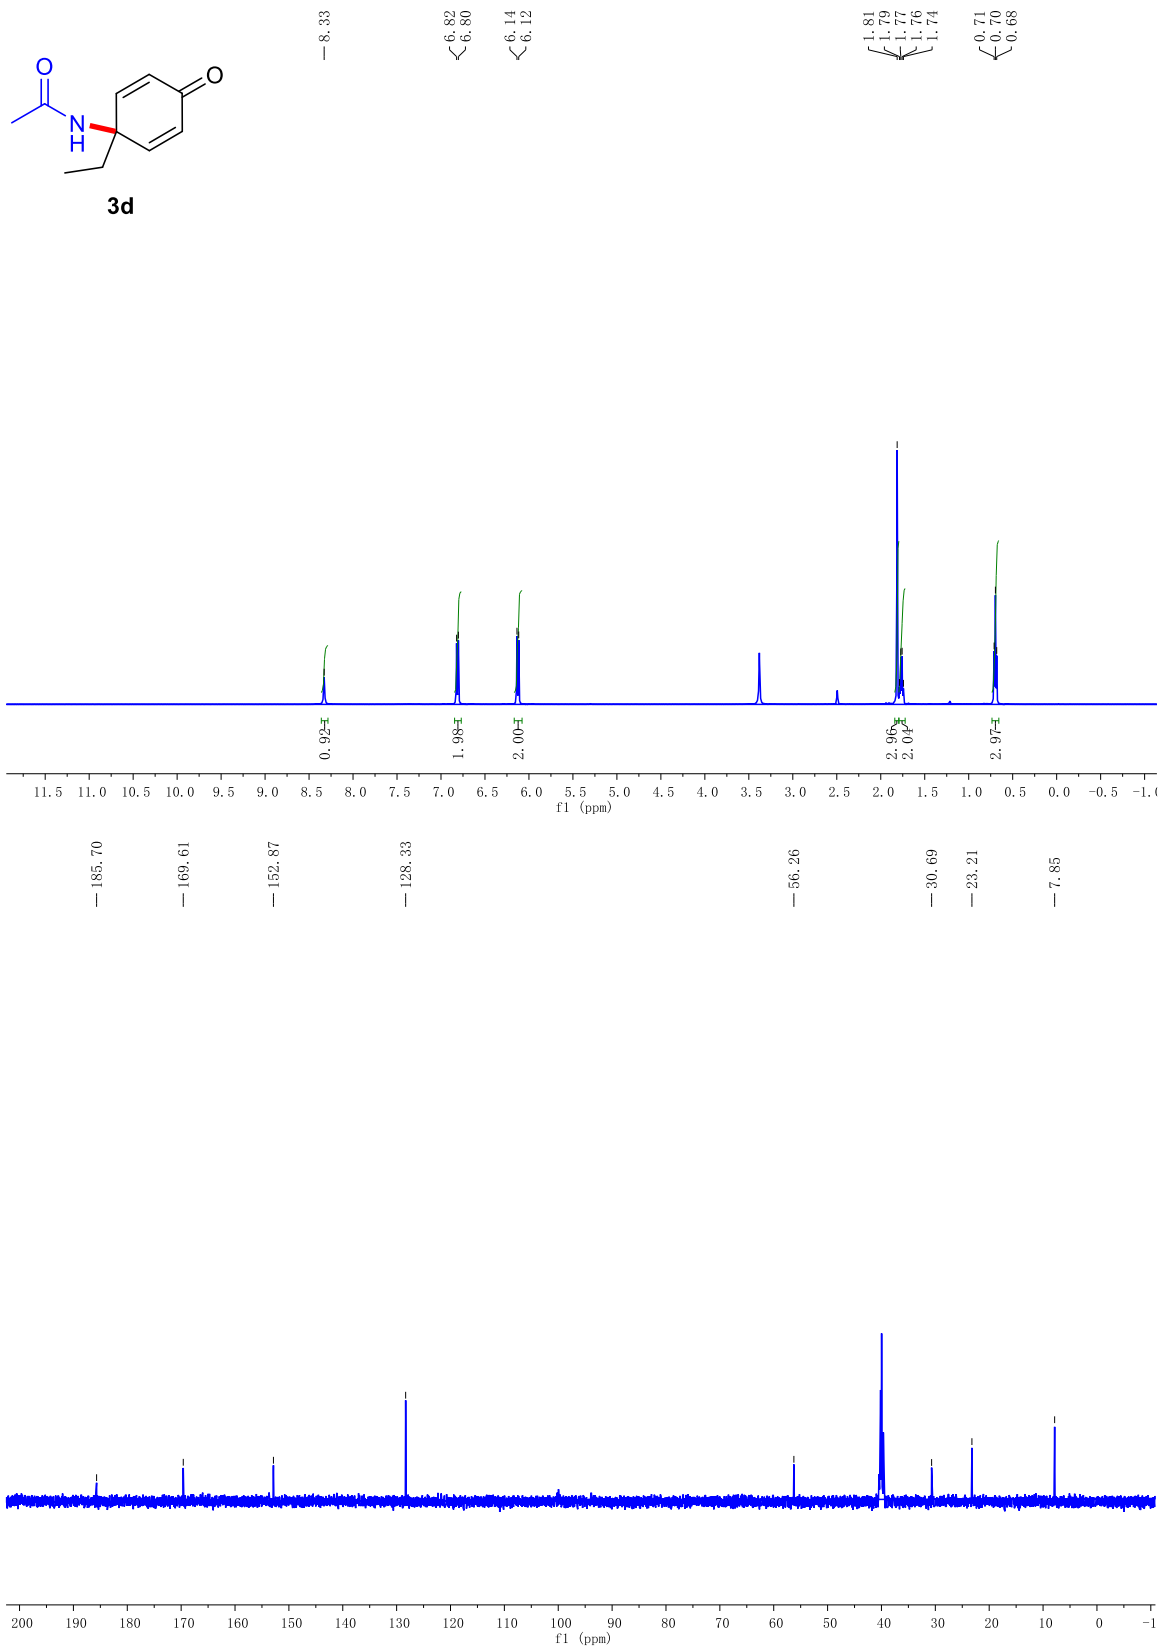

**Supplementary Figure 55.**  $^1\text{H}$  and  $^{13}\text{C}$  NMR spectra for compound **3d**

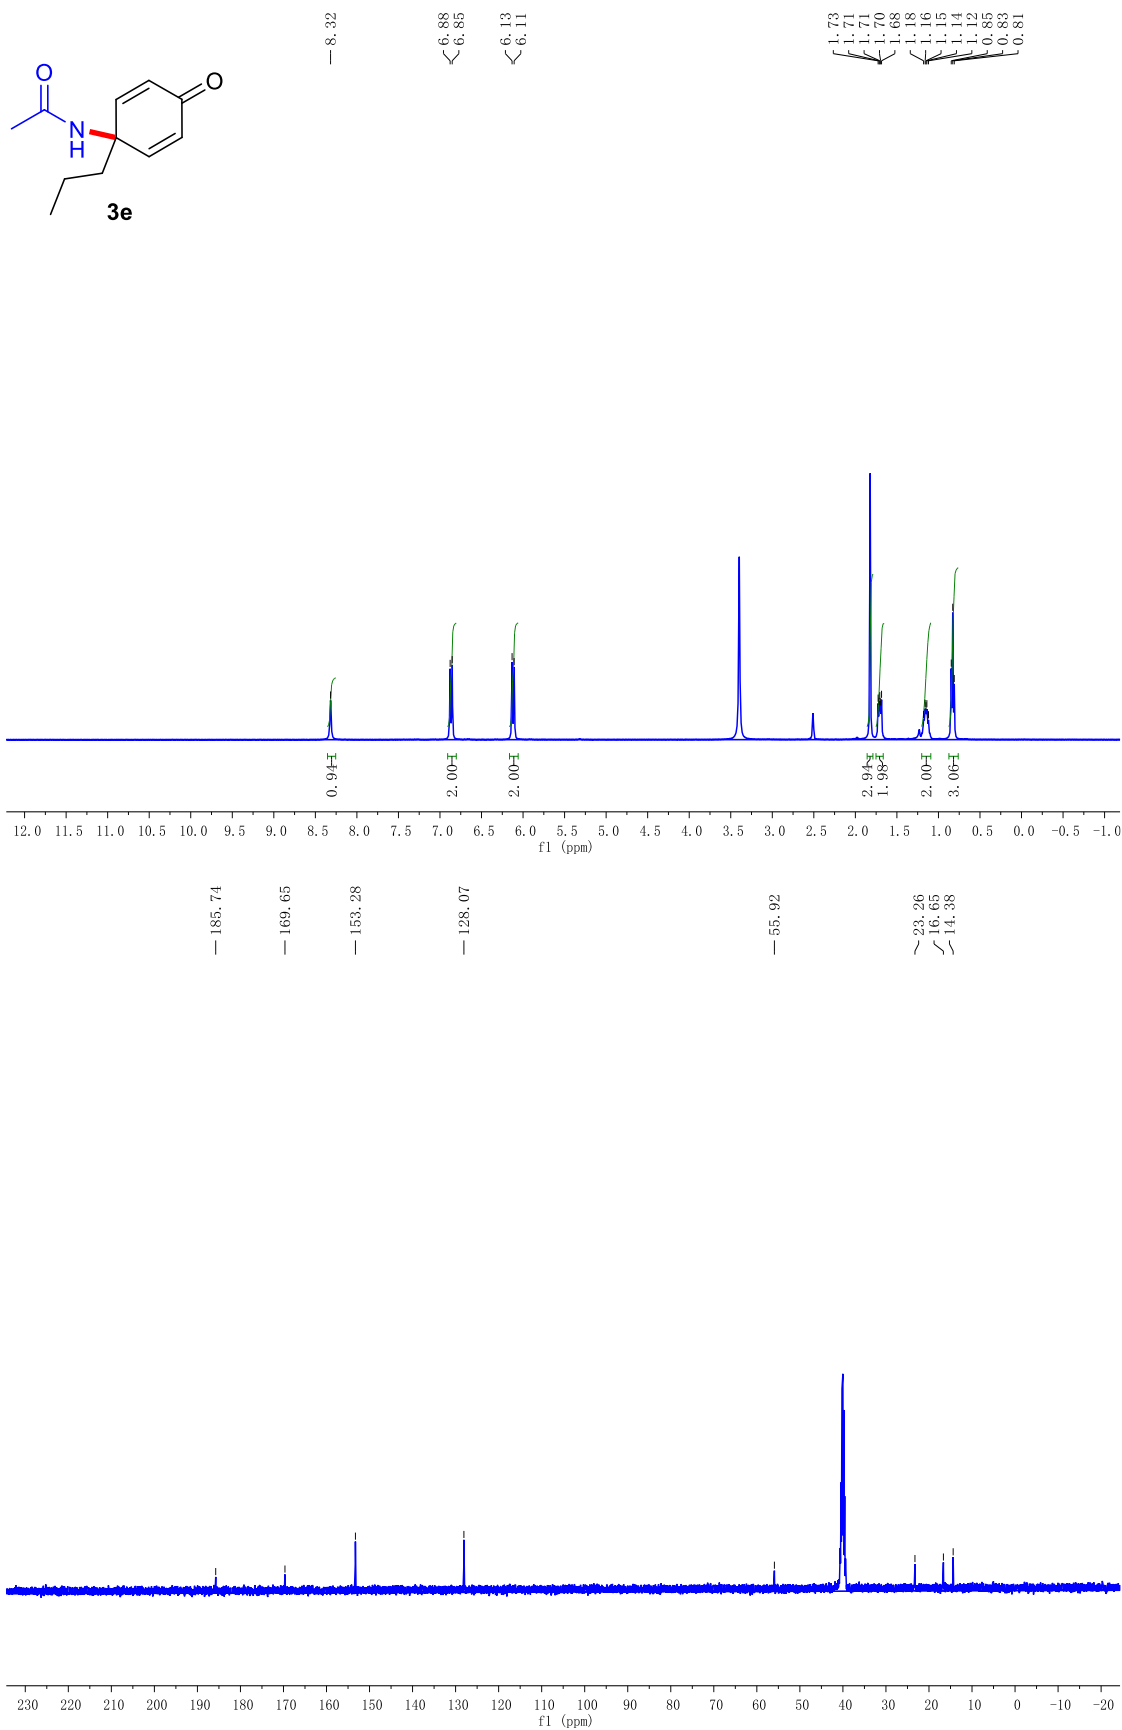

**Supplementary Figure 56.** <sup>1</sup>H and <sup>13</sup>C NMR spectra for compound **3e**

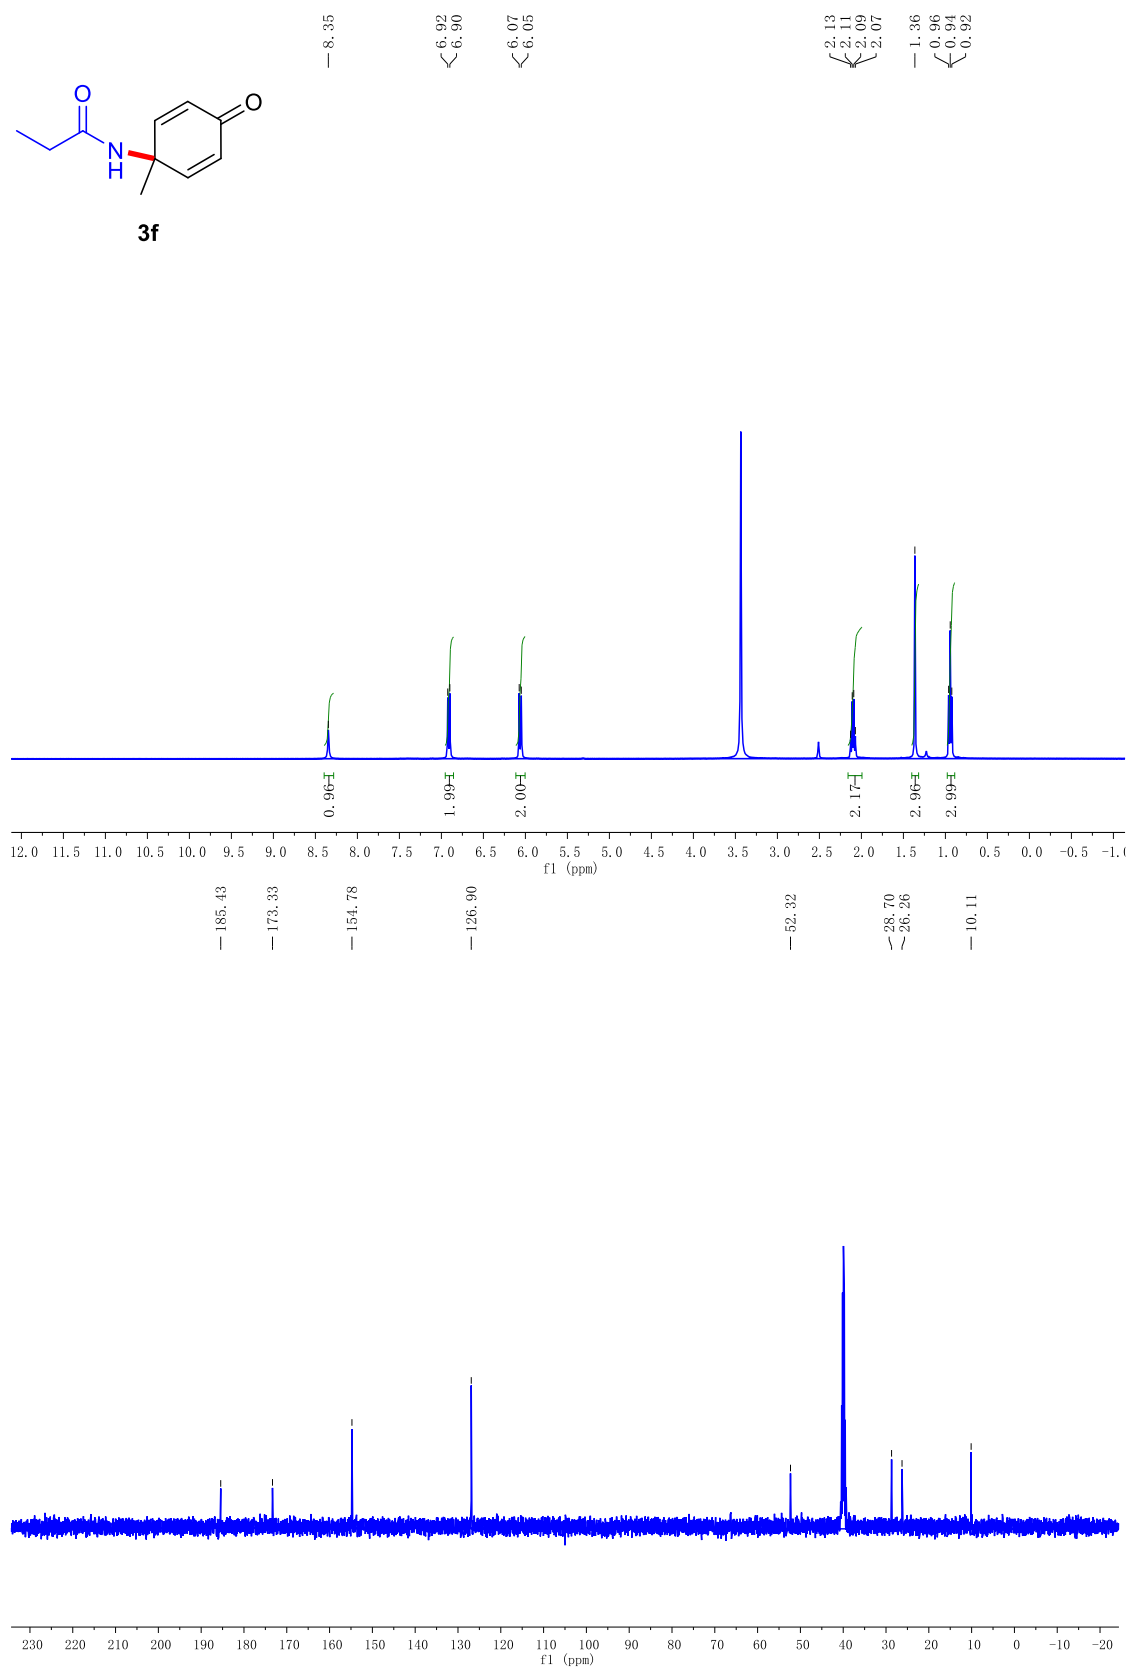

**Supplementary Figure 57.**  $^1\text{H}$  and  $^{13}\text{C}$  NMR spectra for compound **3f**

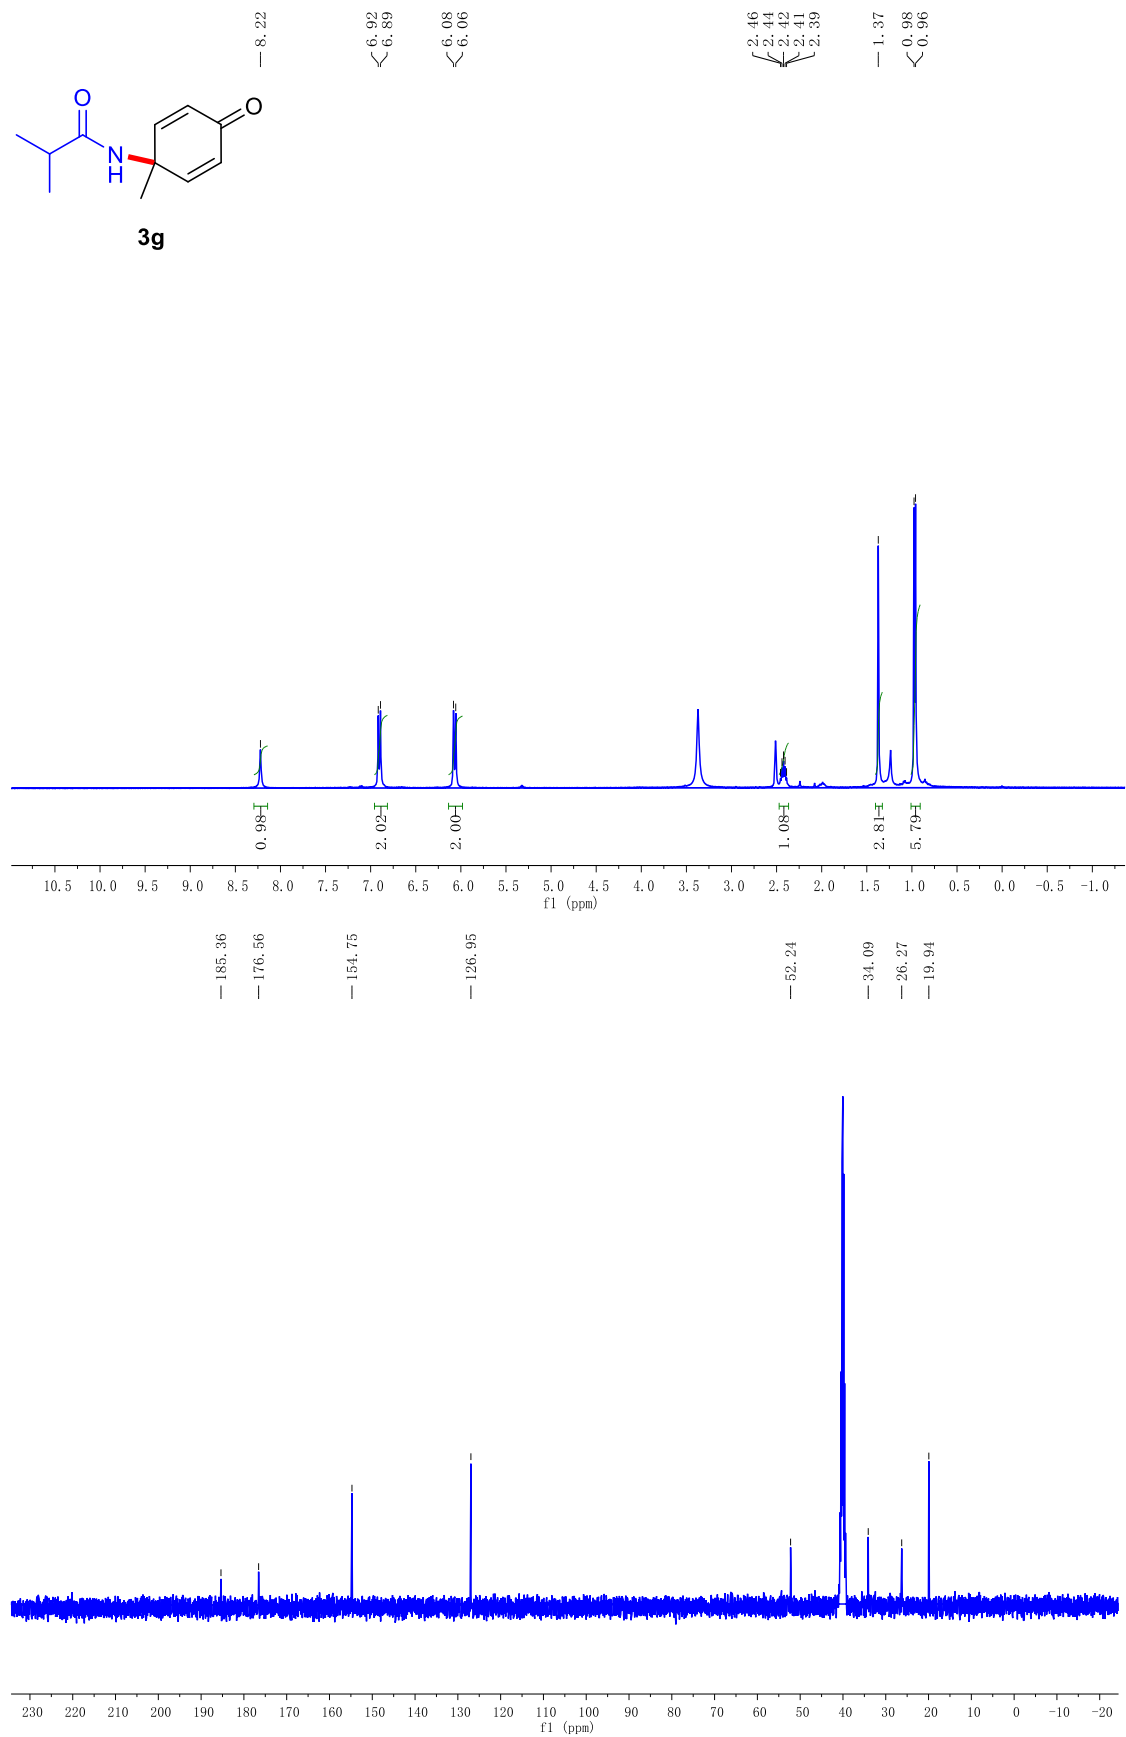

Supplementary Figure 58. <sup>1</sup>H and <sup>13</sup>C NMR spectra for compound **3g**

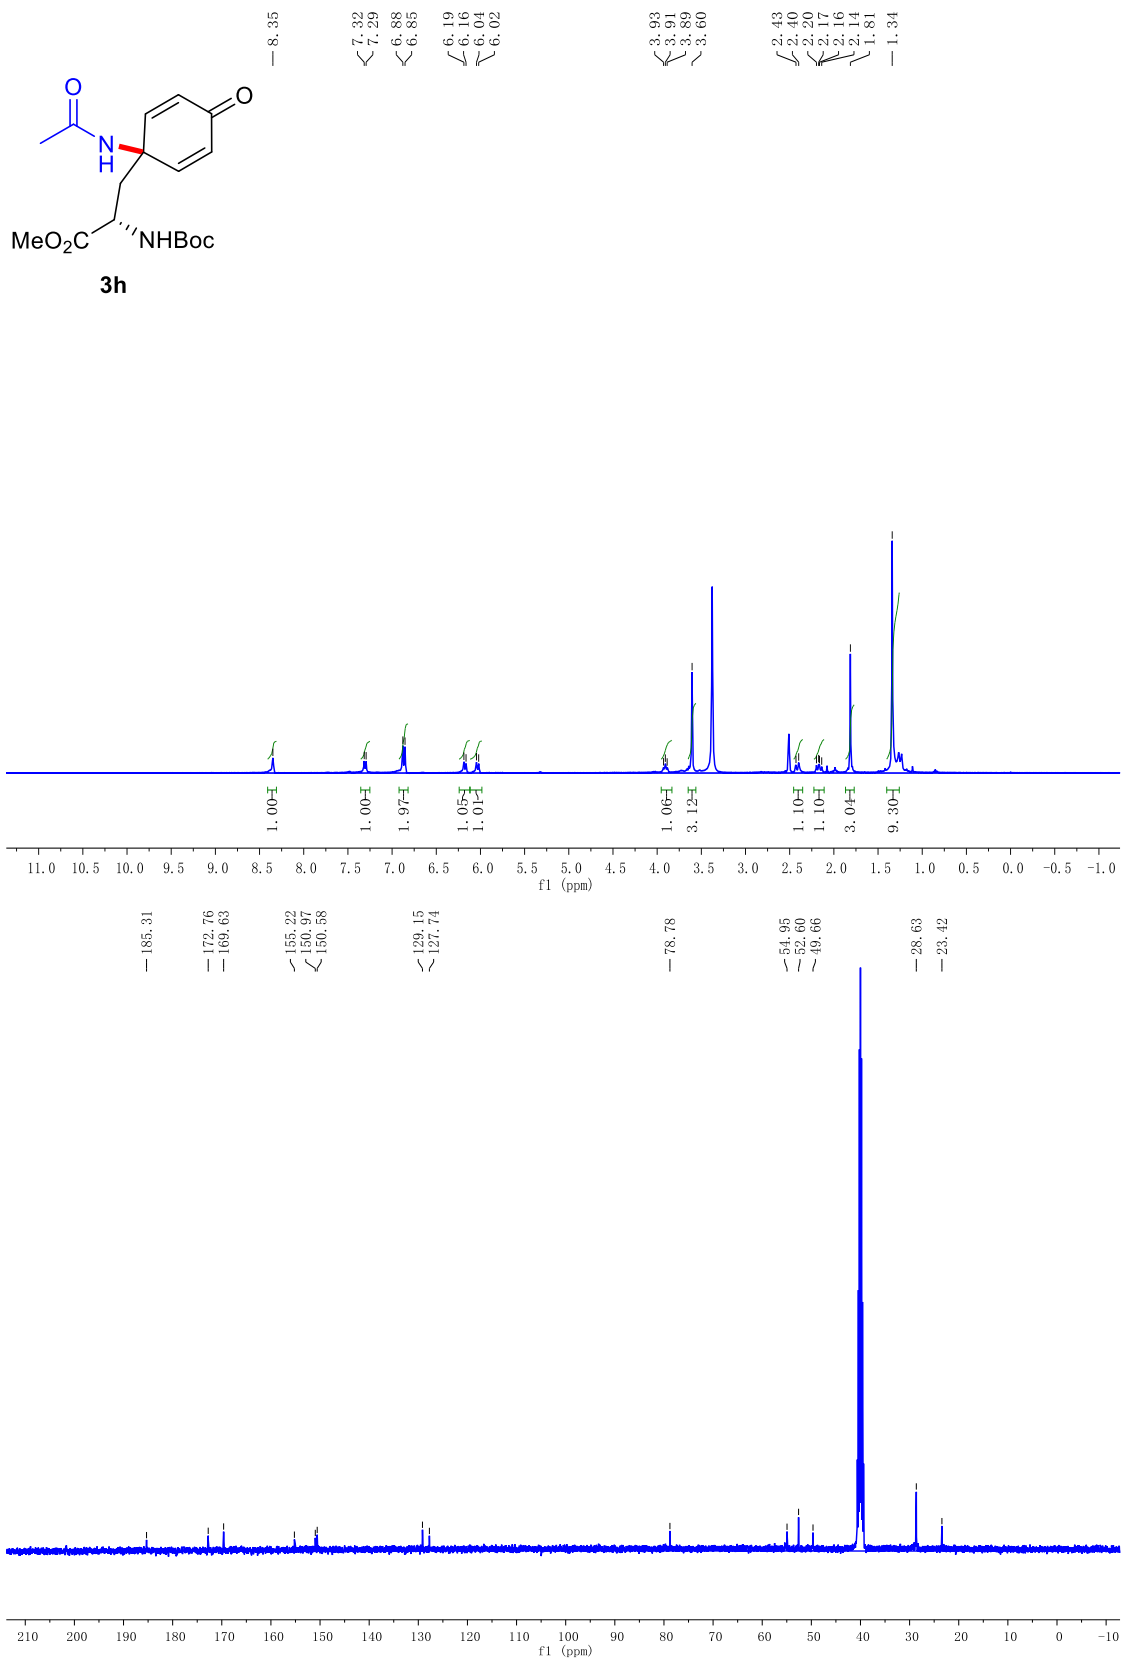

**Supplementary Figure 59.** <sup>1</sup>H and <sup>13</sup>C NMR spectra for compound **3h**

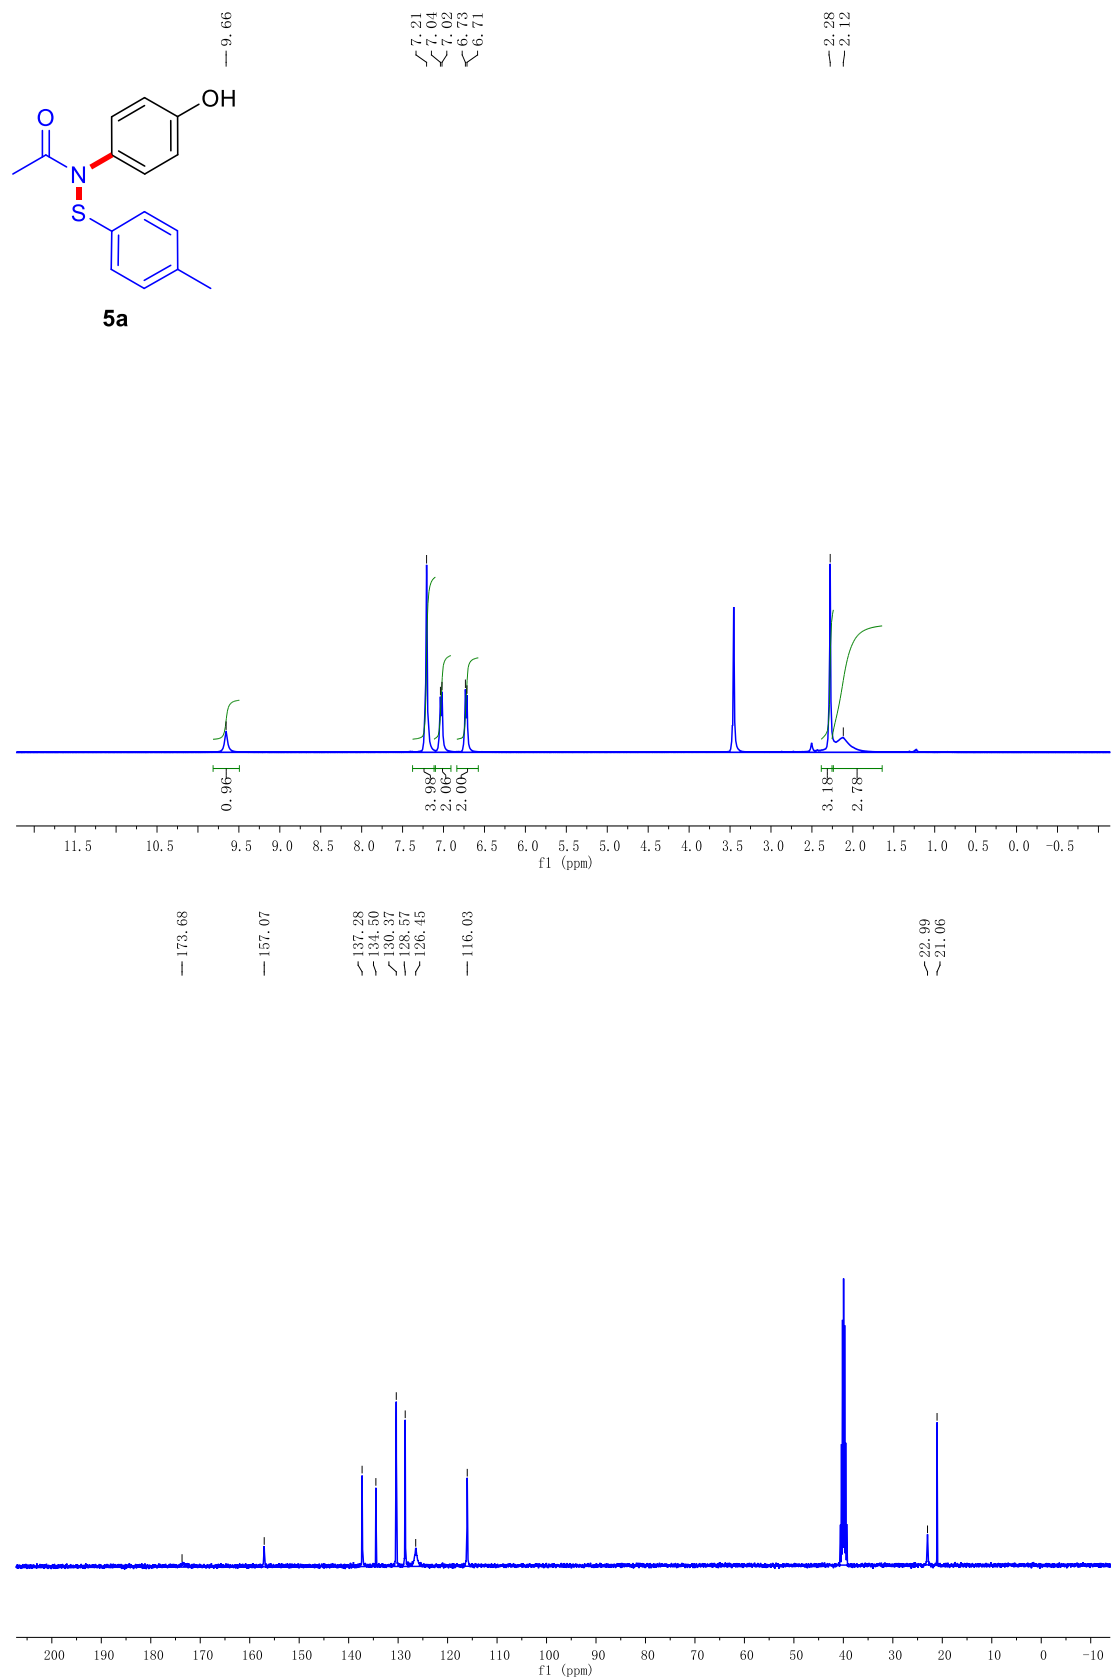

**Supplementary Figure 60.** <sup>1</sup>H and <sup>13</sup>C NMR spectra for compound **5a**

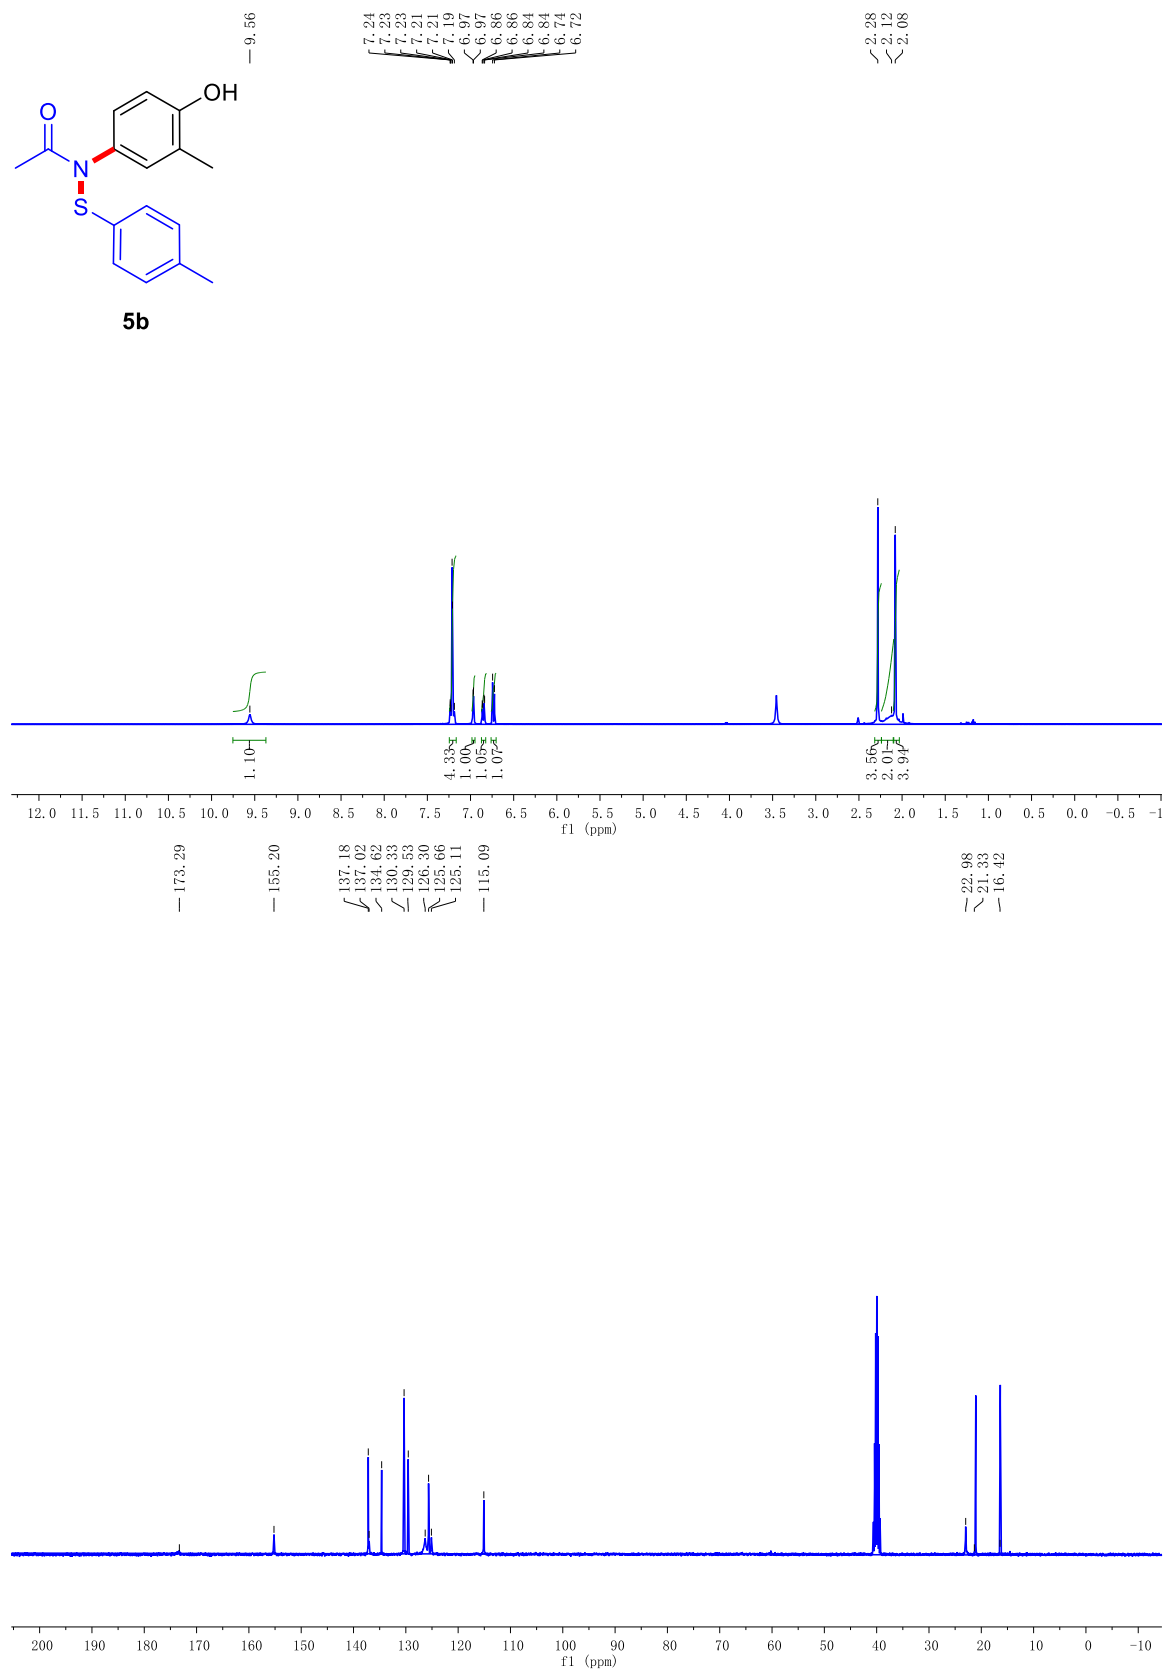

**Supplementary Figure 61.** <sup>1</sup>H and <sup>13</sup>C NMR spectra for compound **5b**

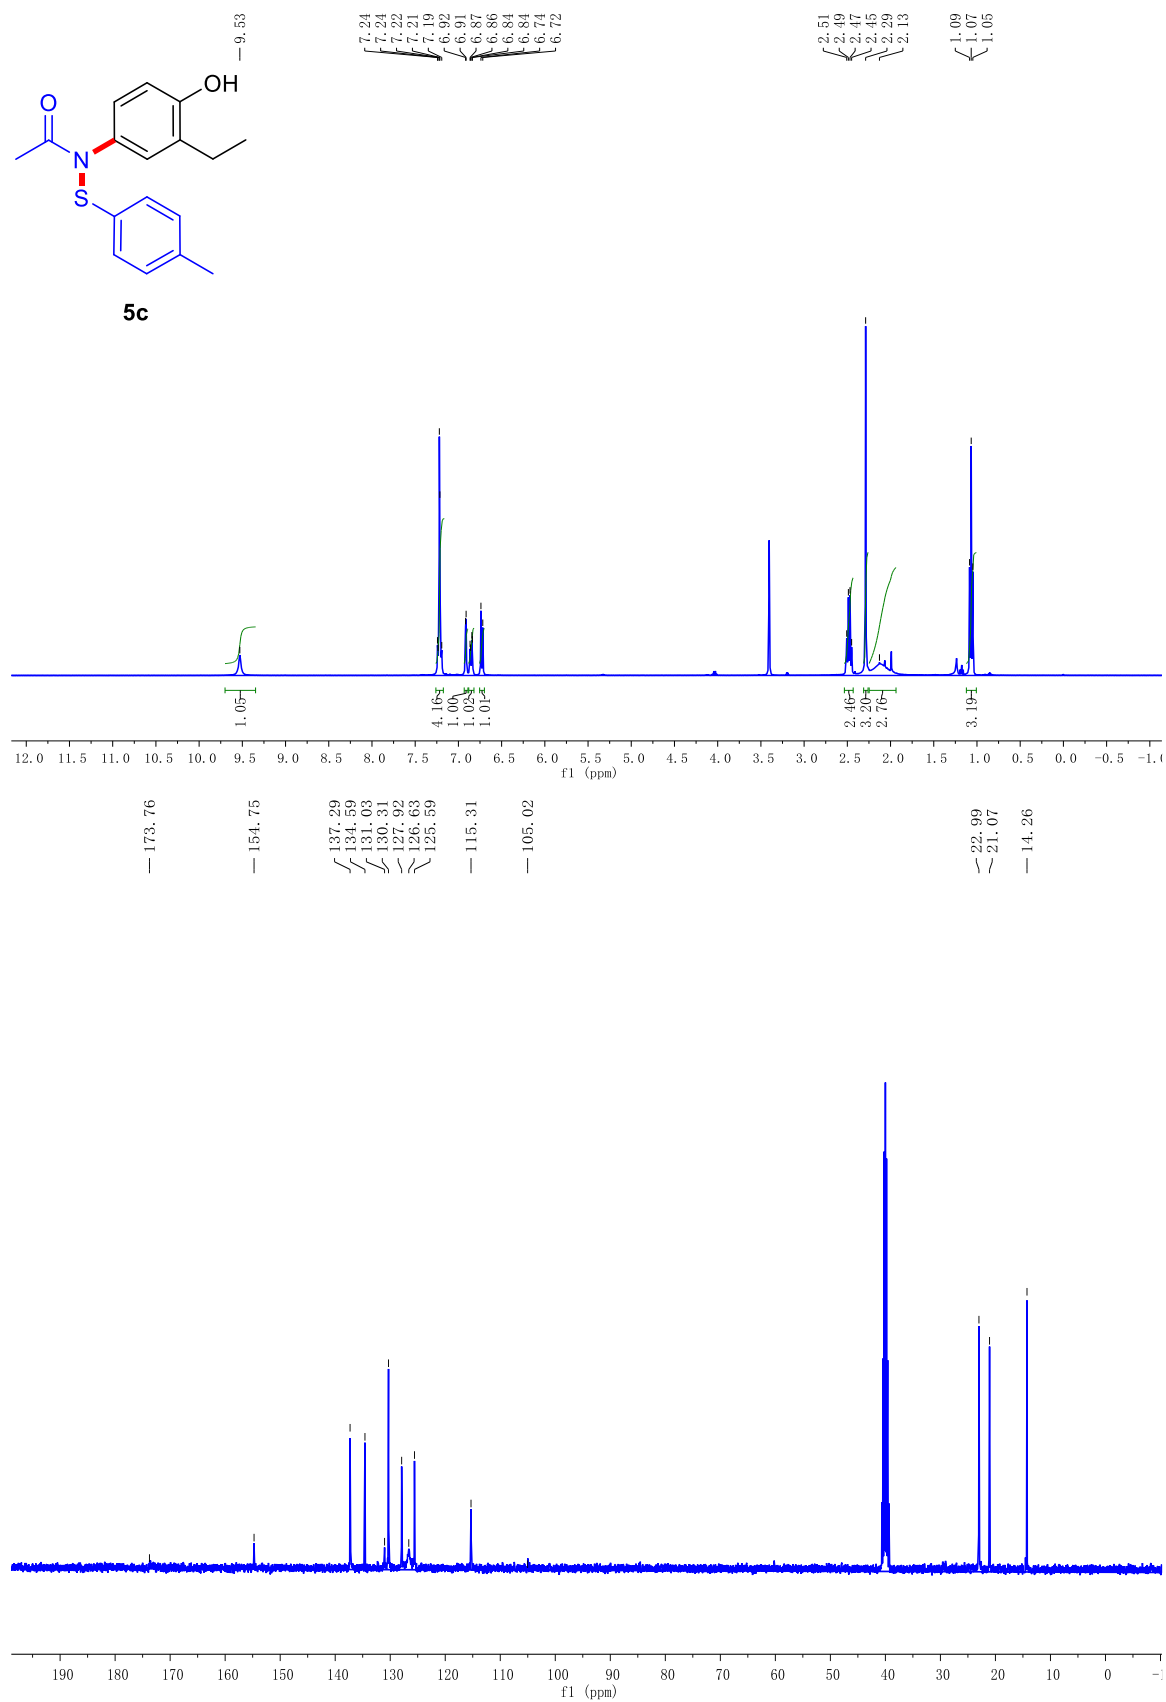

**Supplementary Figure 62.**  $^1\text{H}$  and  $^{13}\text{C}$  NMR spectra for compound **5c**



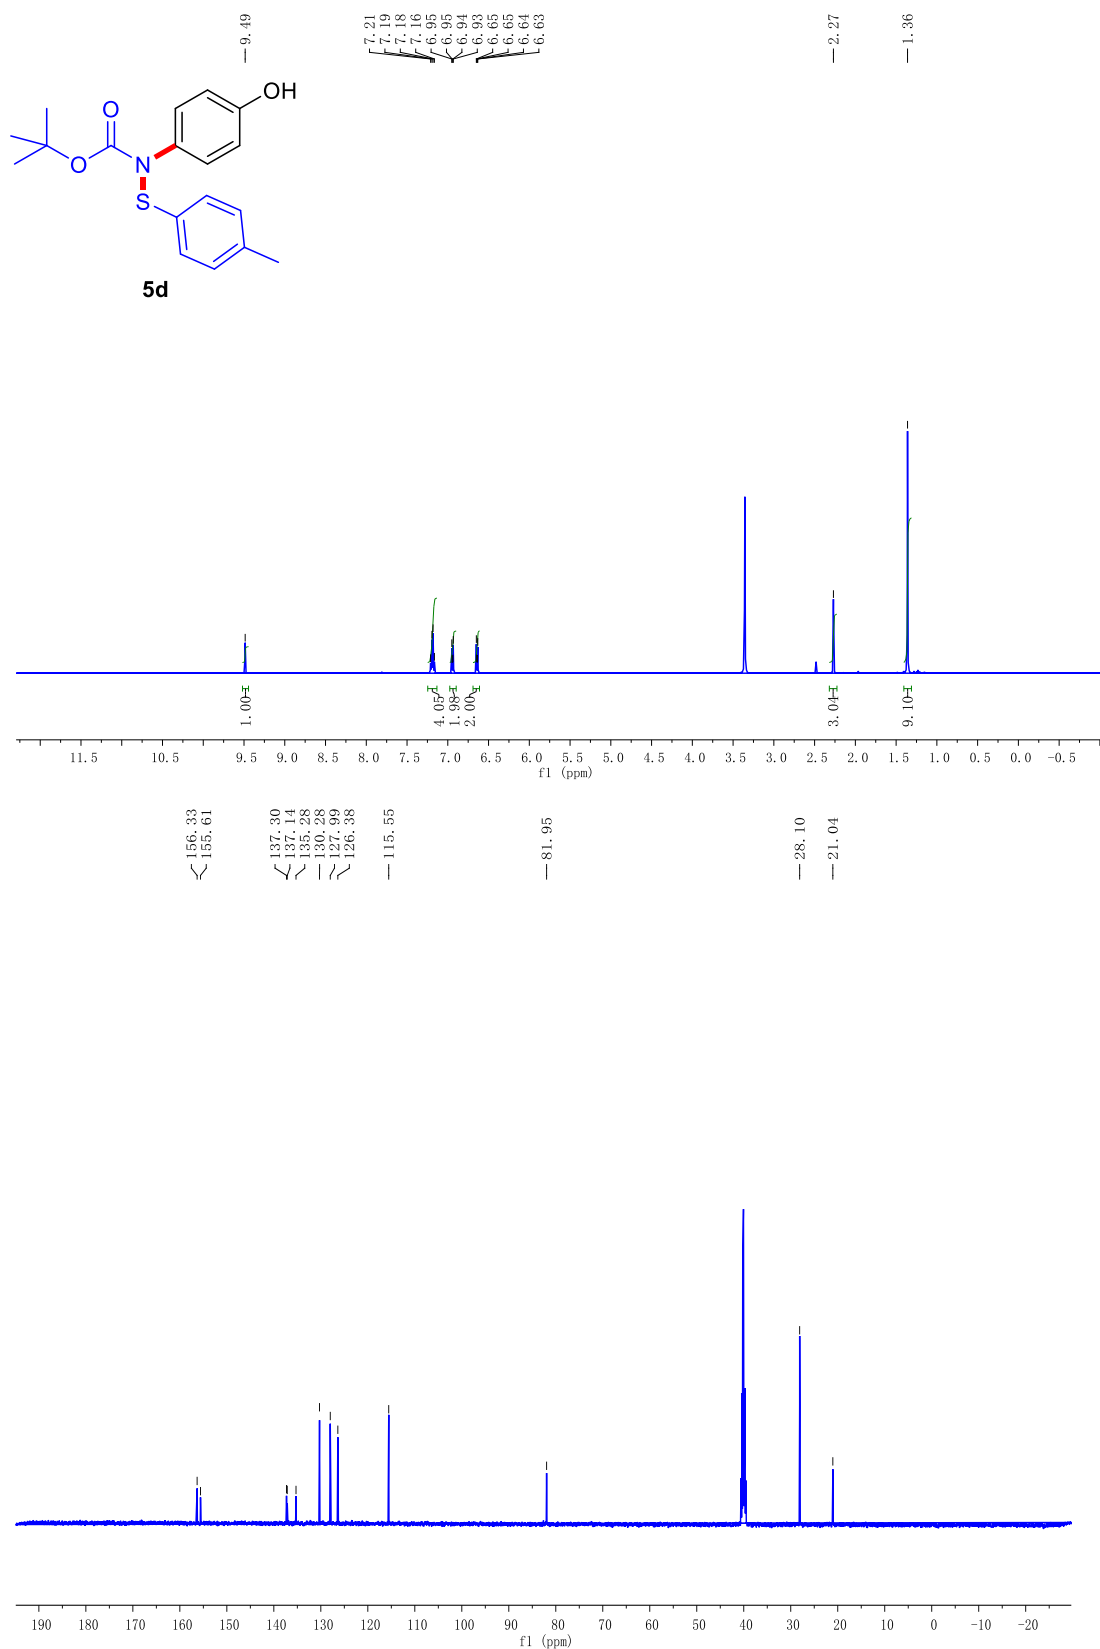

**Supplementary Figure 63.** <sup>1</sup>H and <sup>13</sup>C NMR spectra for compound **5d**

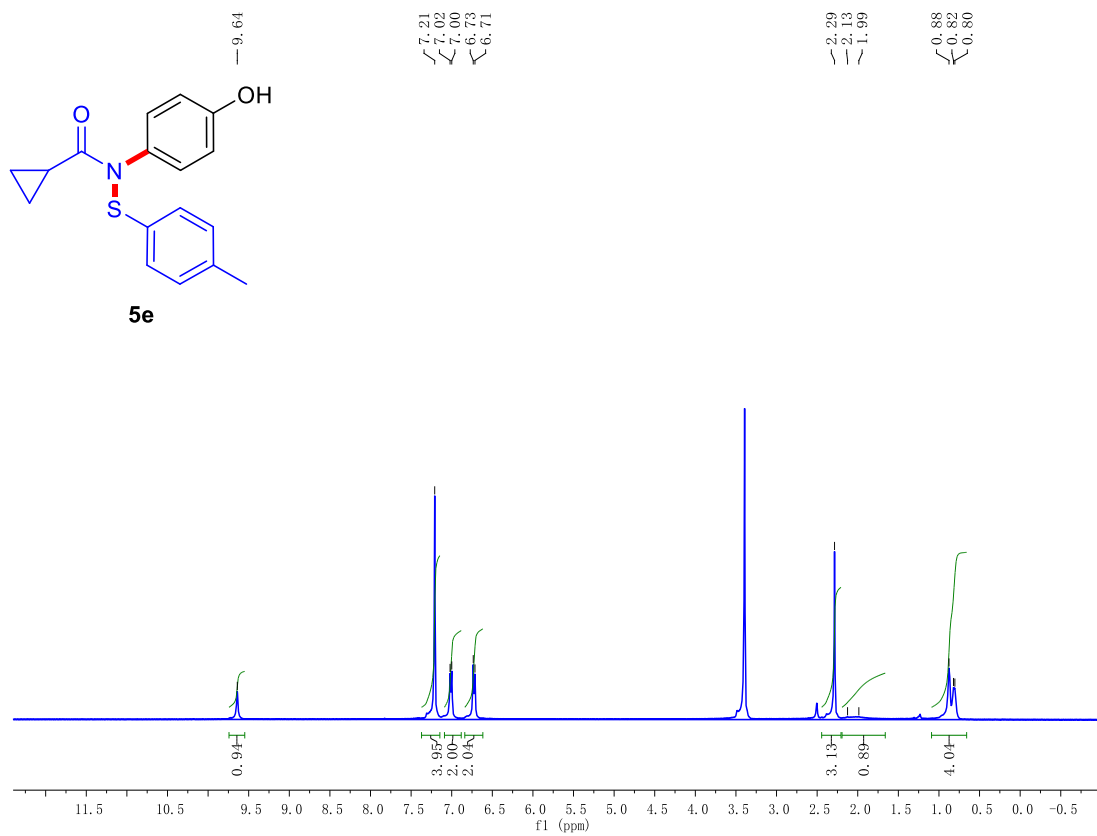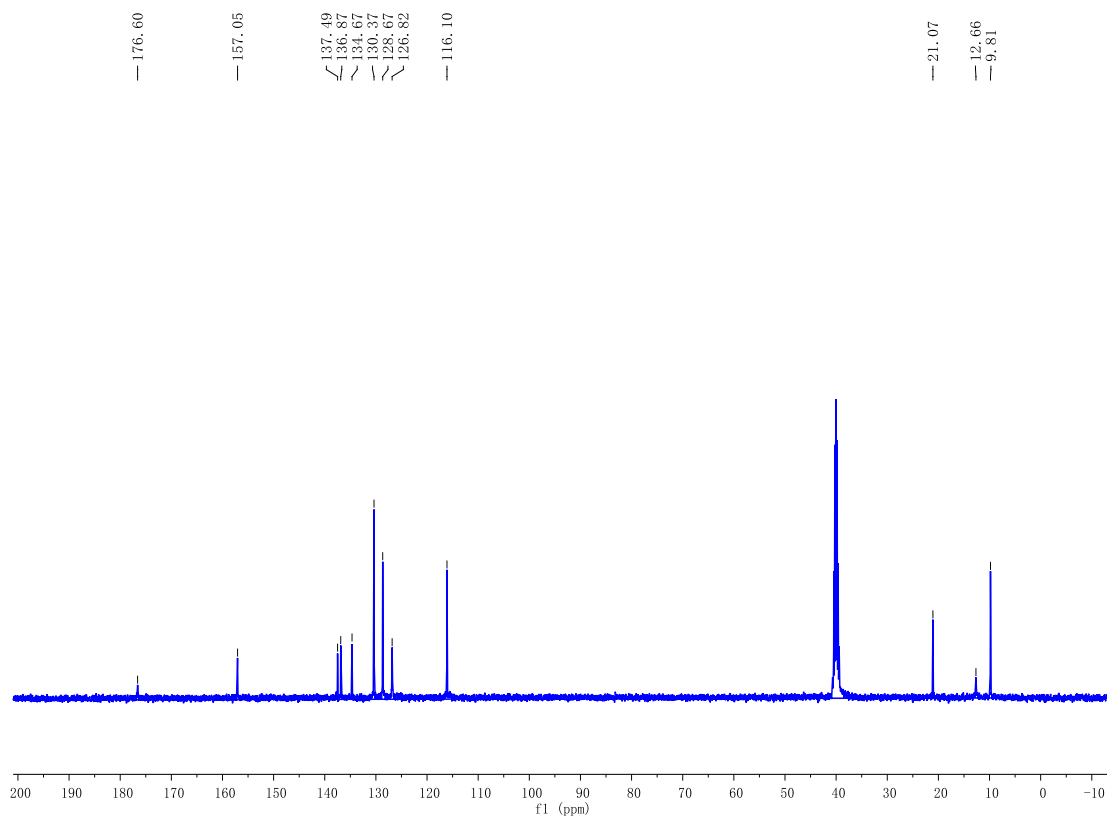

**Supplementary Figure 64.**  $^1\text{H}$  and  $^{13}\text{C}$  NMR spectra for compound **5e**

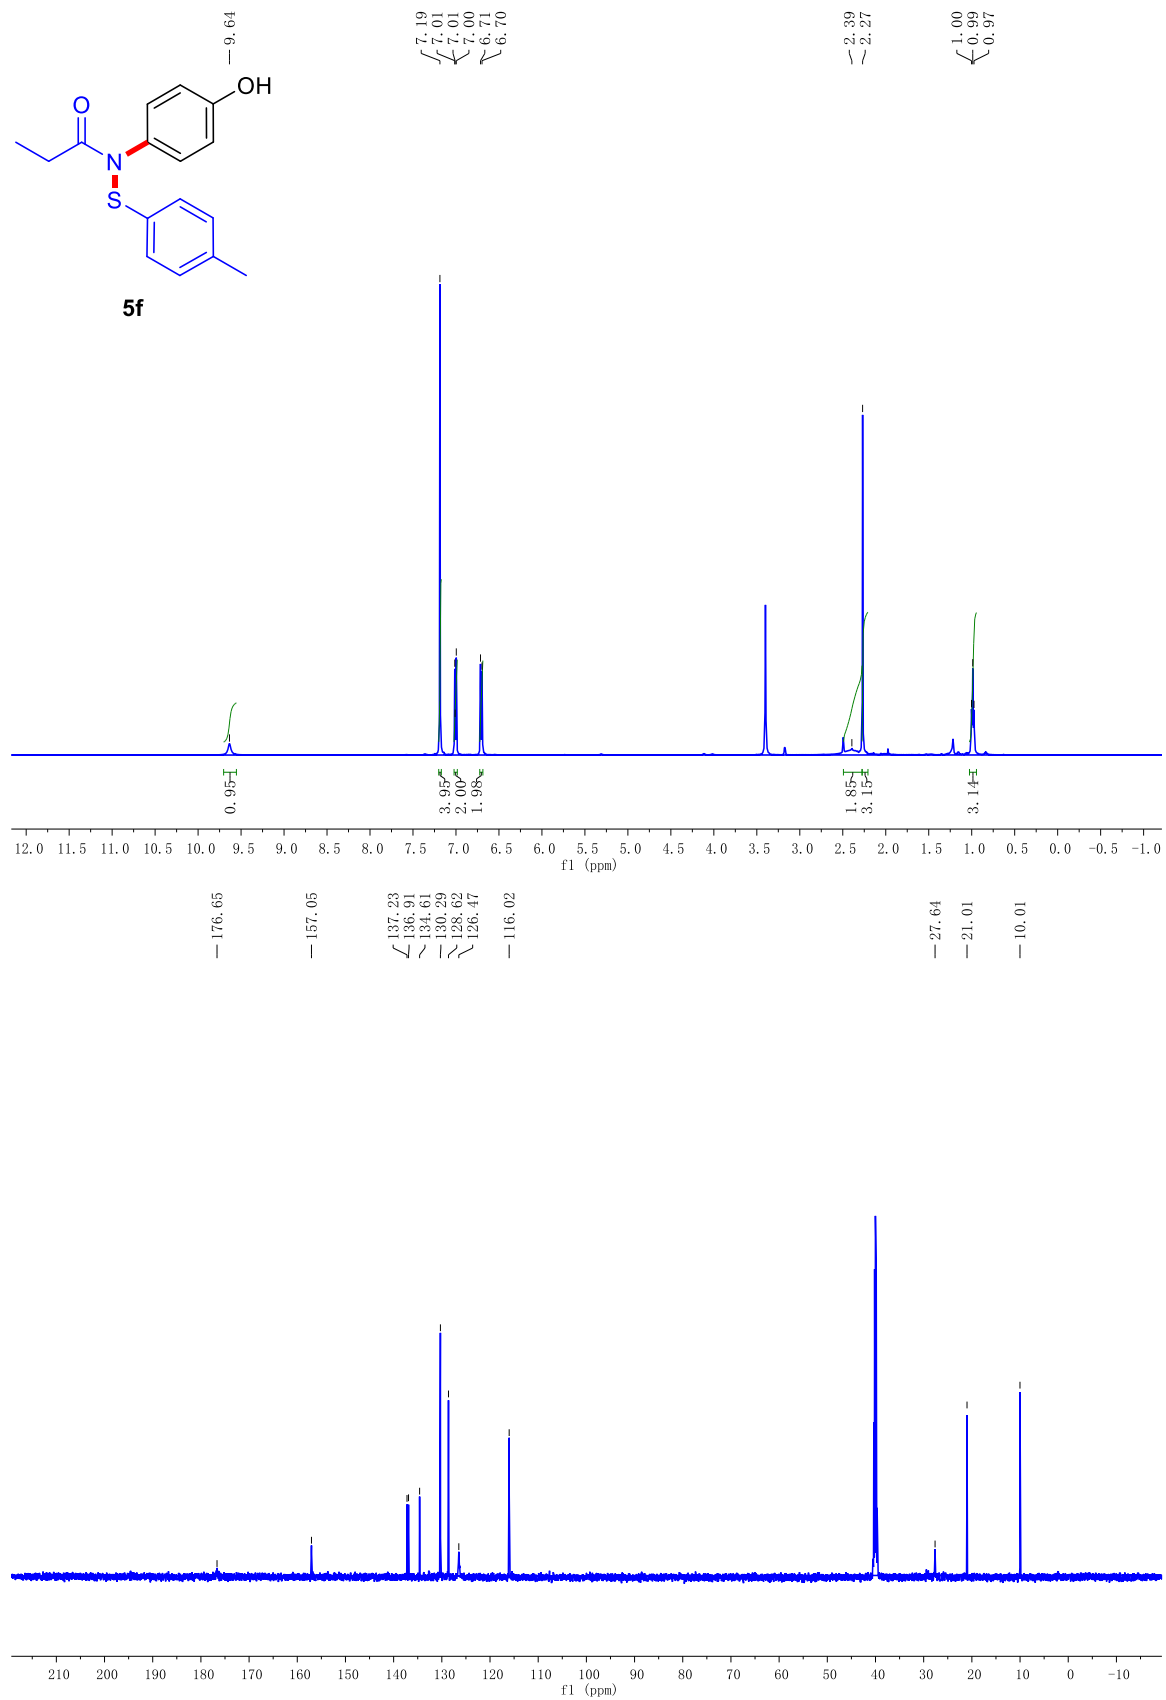

**Supplementary Figure 65.** <sup>1</sup>H and <sup>13</sup>C NMR spectra for compound **5f**

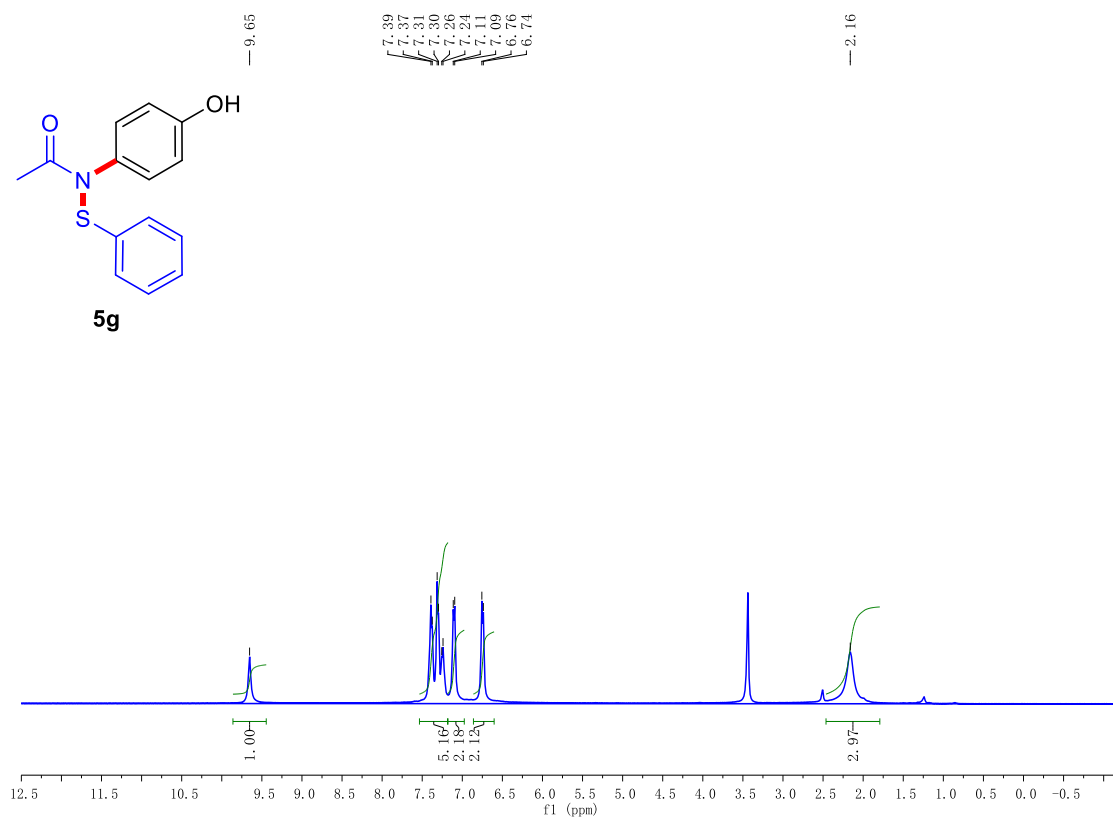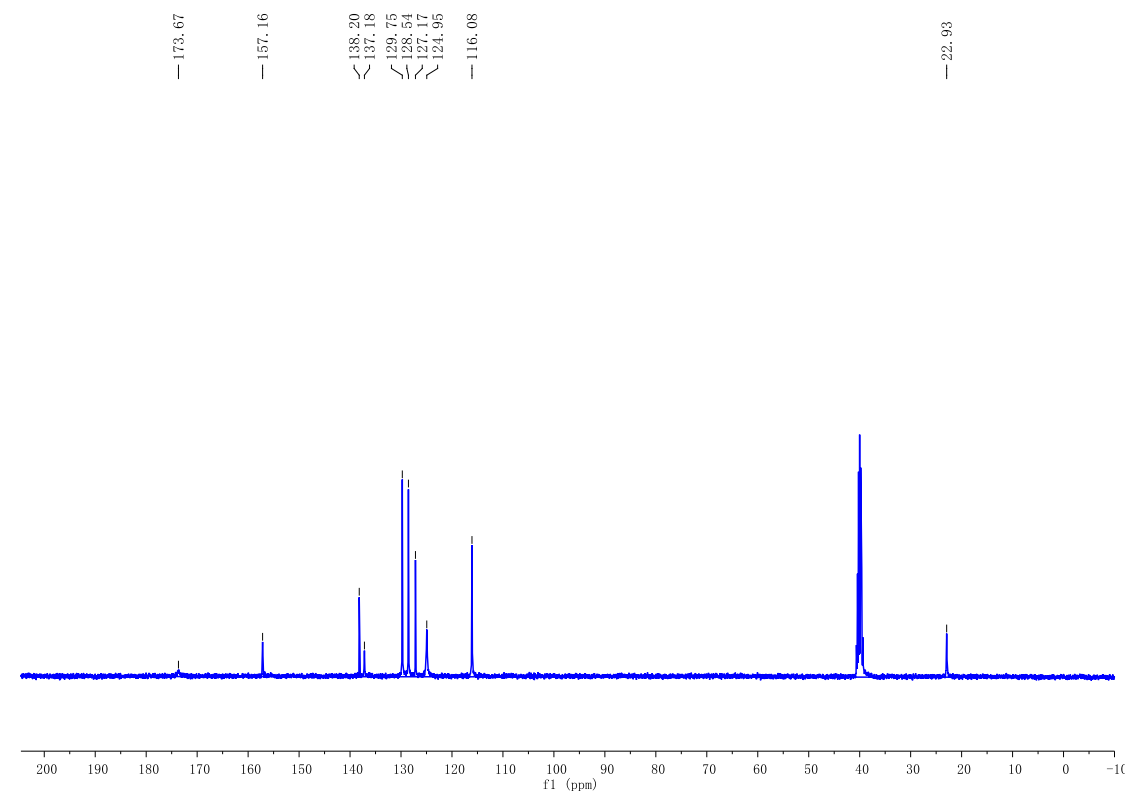

Supplementary Figure 66.  $^1\text{H}$  and  $^{13}\text{C}$  NMR spectra for compound **5g**

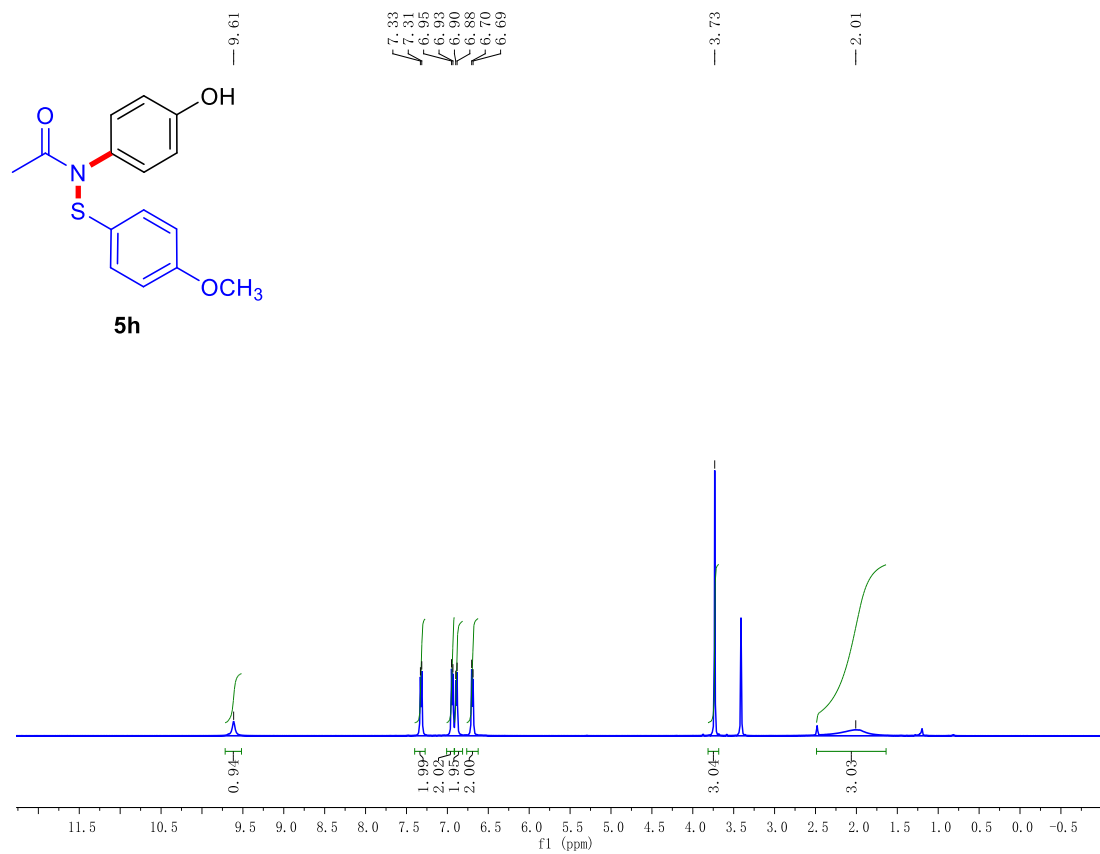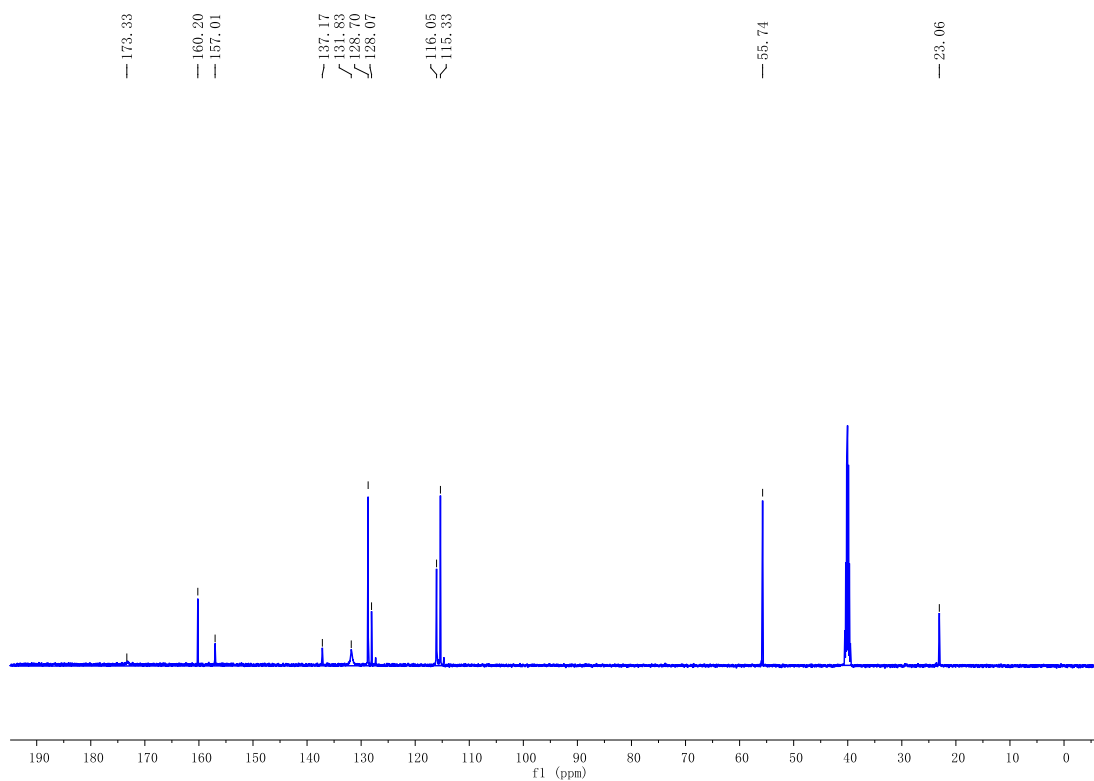

Supplementary Figure 67.  $^1\text{H}$  and  $^{13}\text{C}$  NMR spectra for compound **5h**

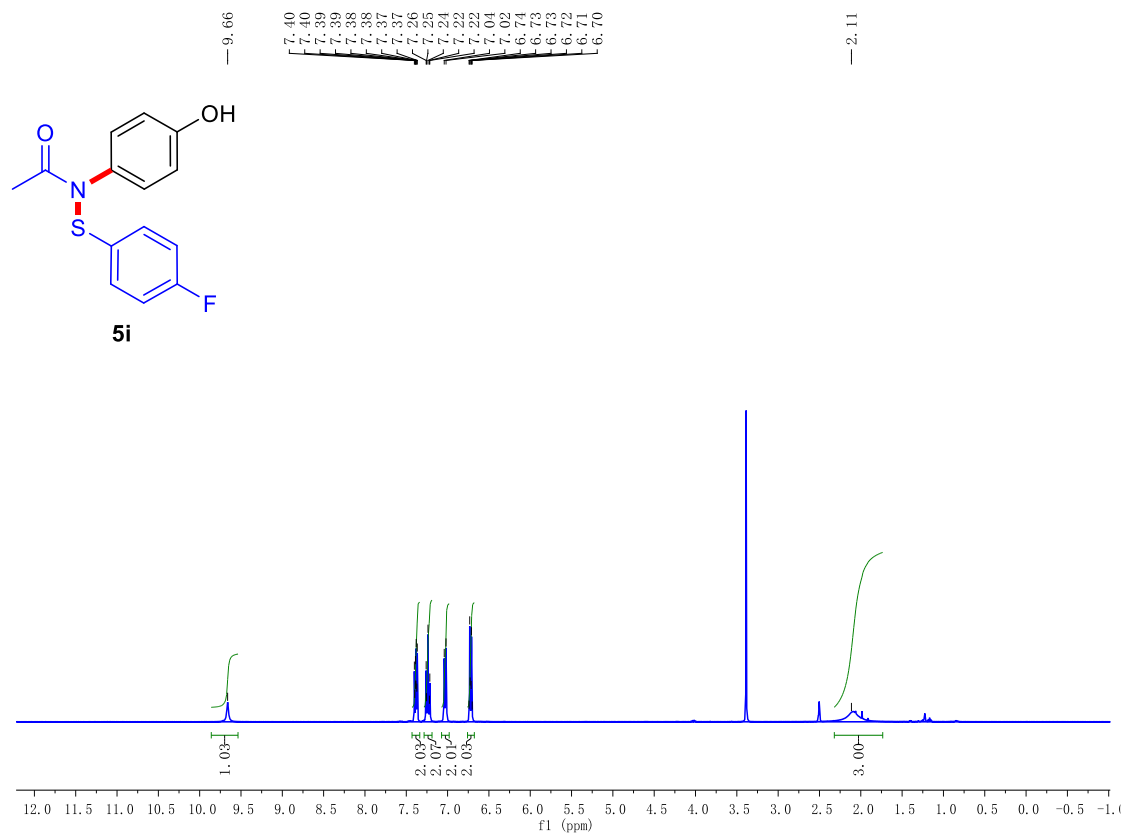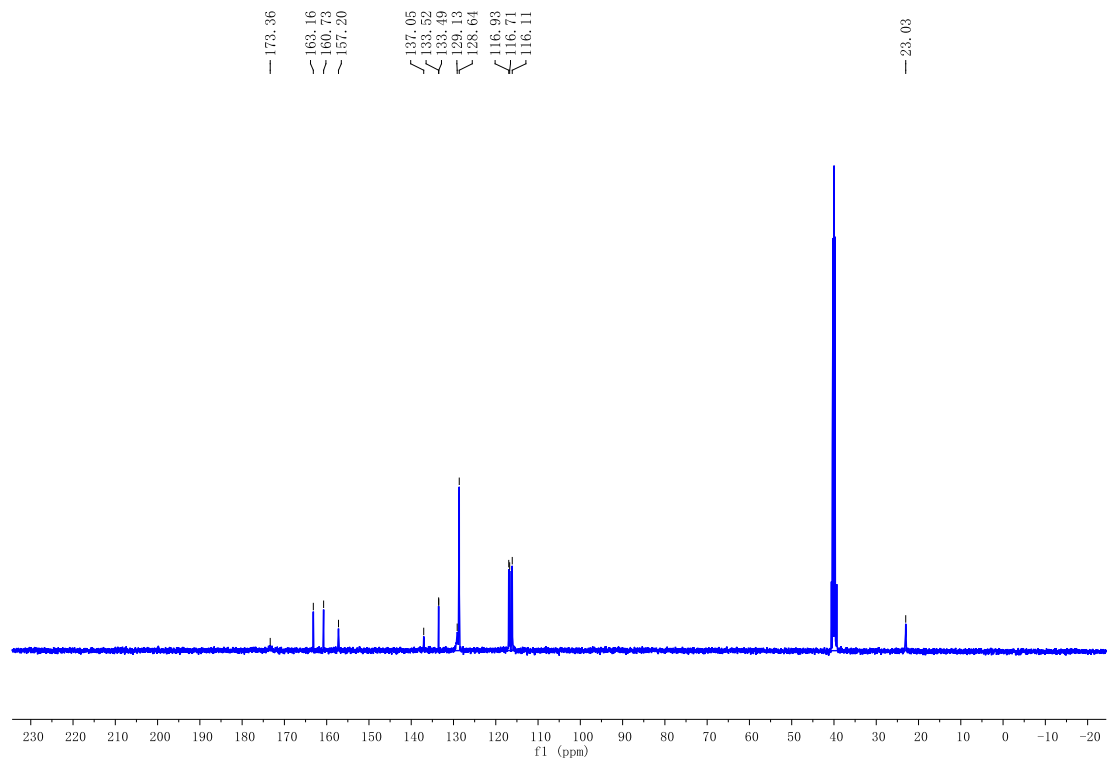

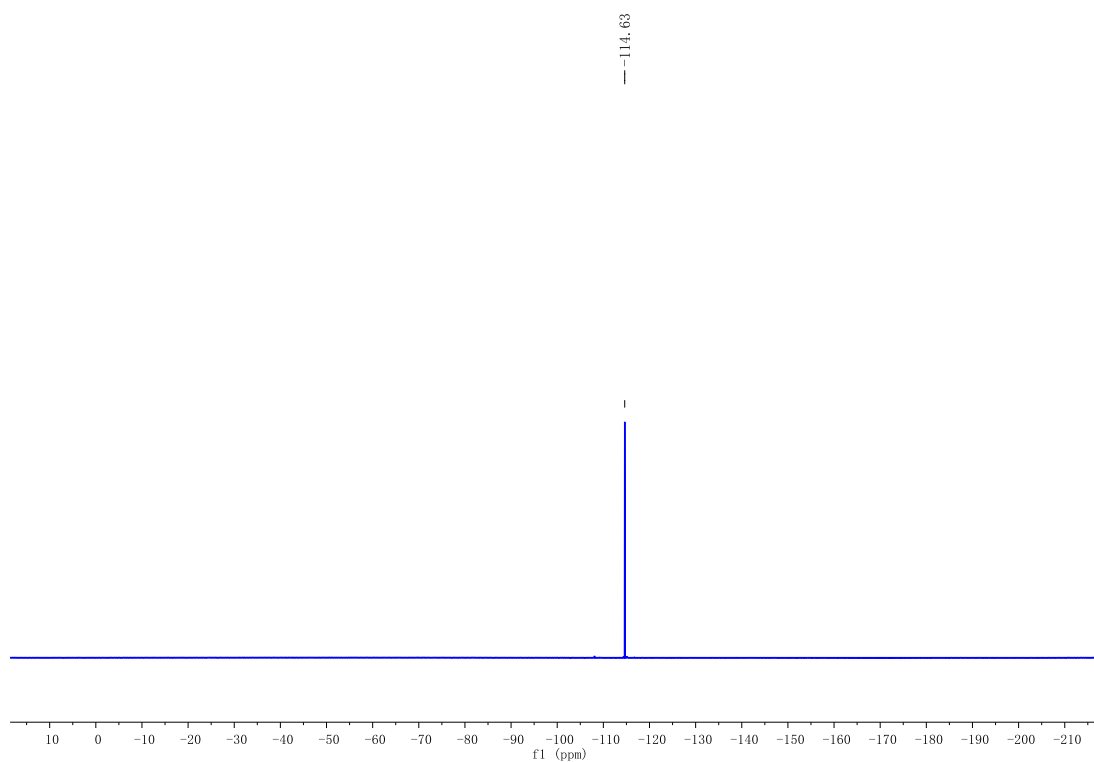

**Supplementary Figure 68.**  $^1\text{H}$ ,  $^{13}\text{C}$  and  $^{19}\text{F}$  NMR spectra for compound **5i**

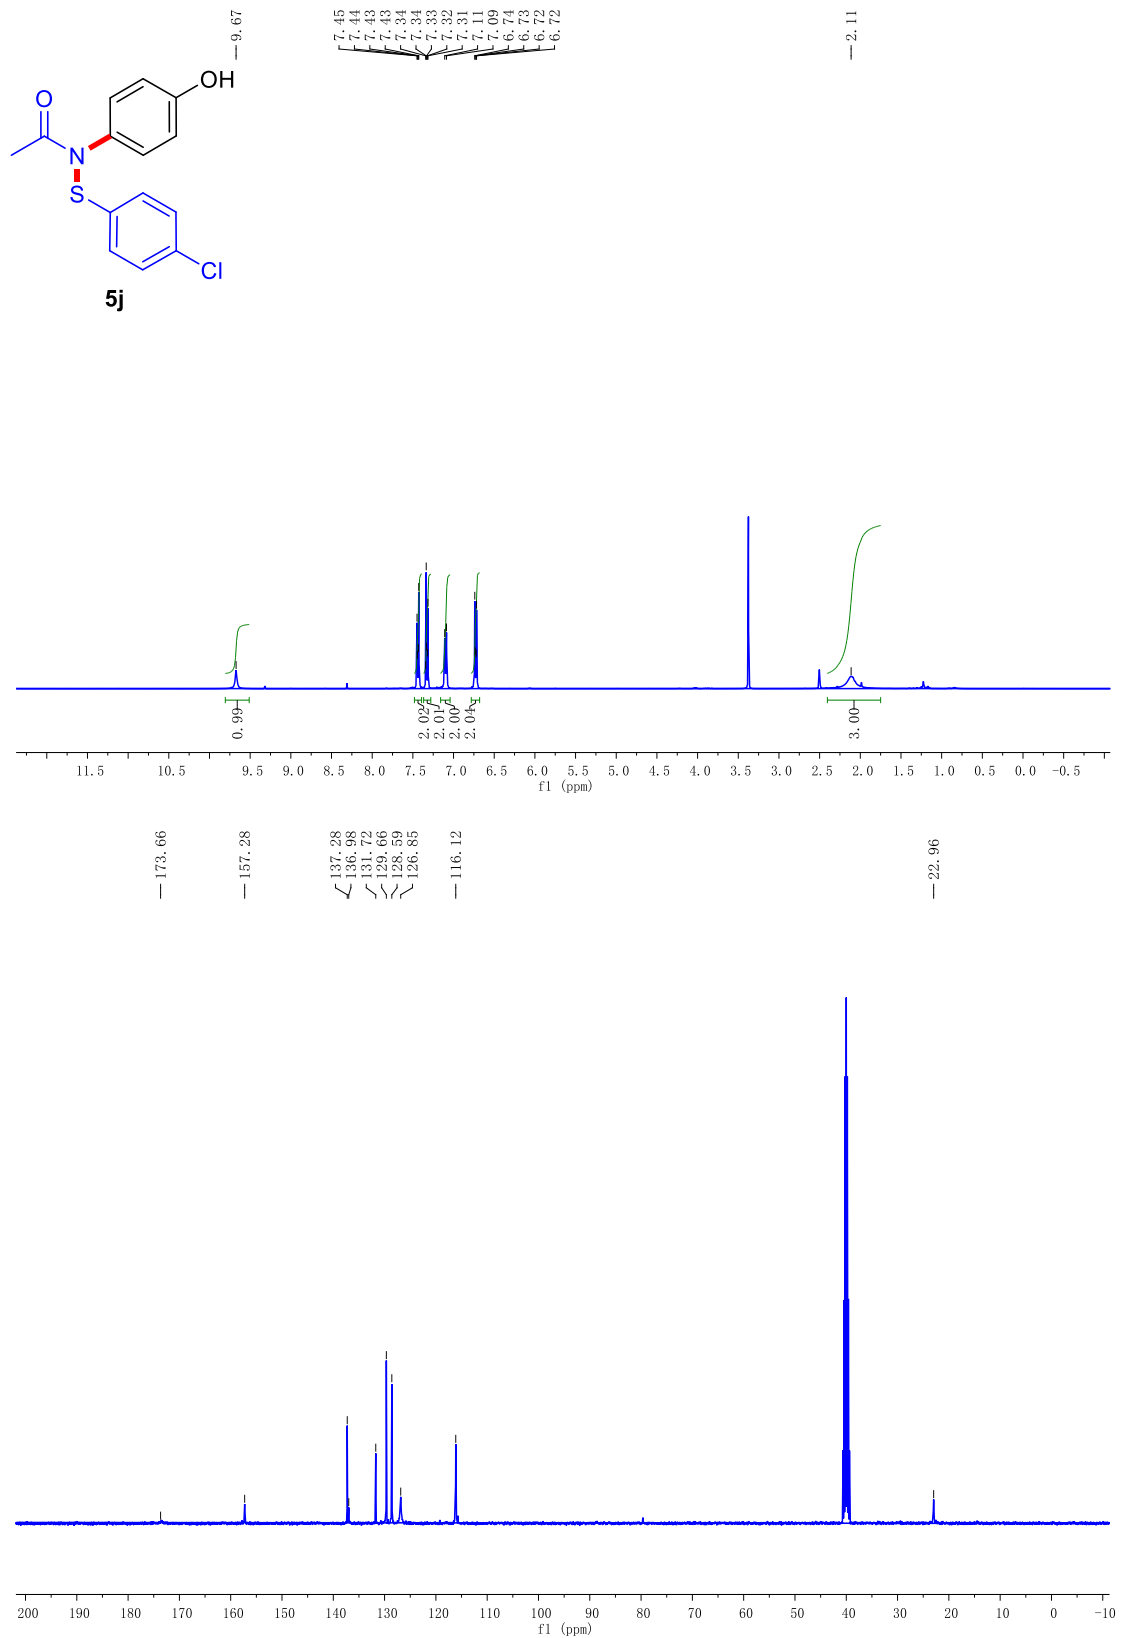

**Supplementary Figure 69.** <sup>1</sup>H and <sup>13</sup>C NMR spectra for compound **5j**



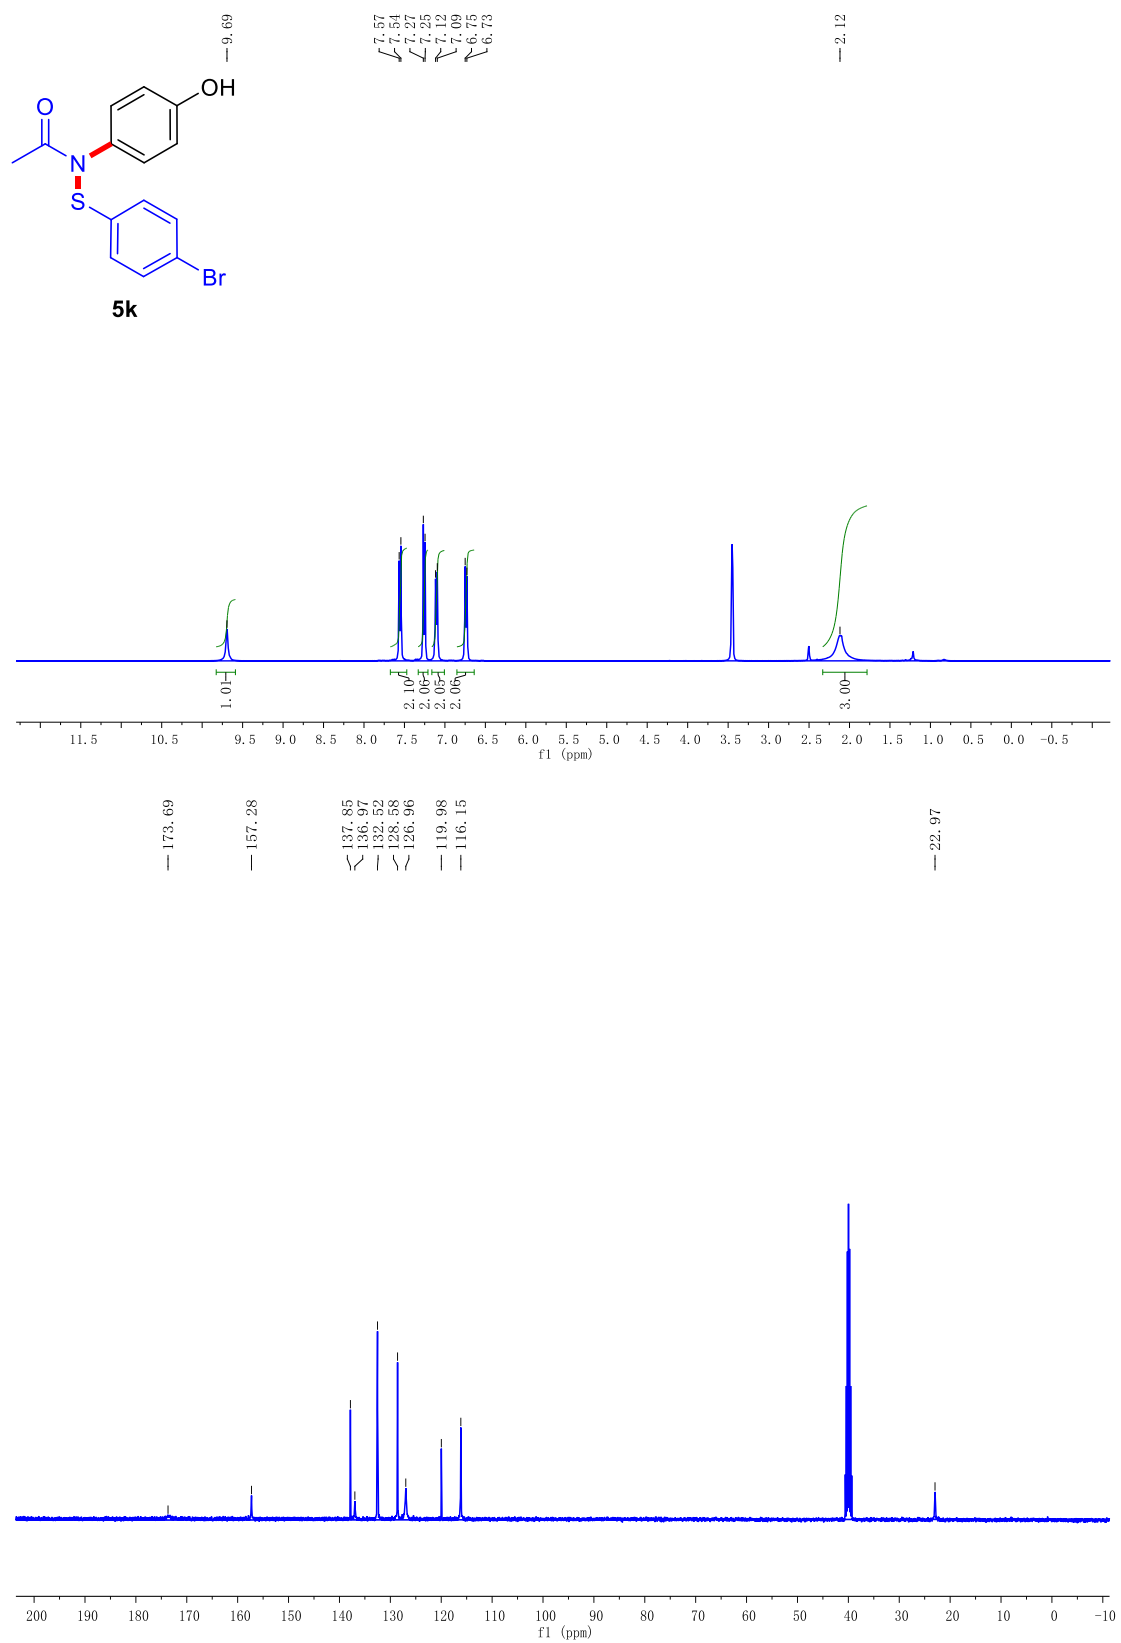

**Supplementary Figure 70.** <sup>1</sup>H and <sup>13</sup>C NMR spectra for compound **5k**

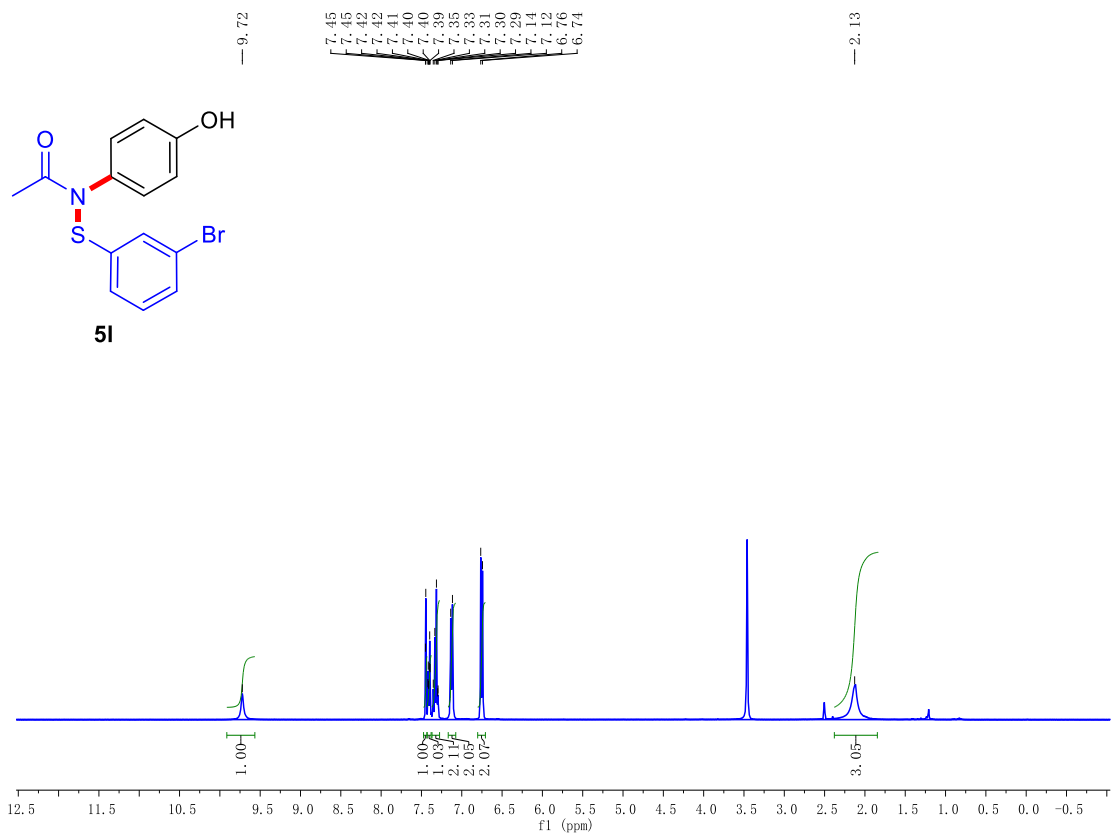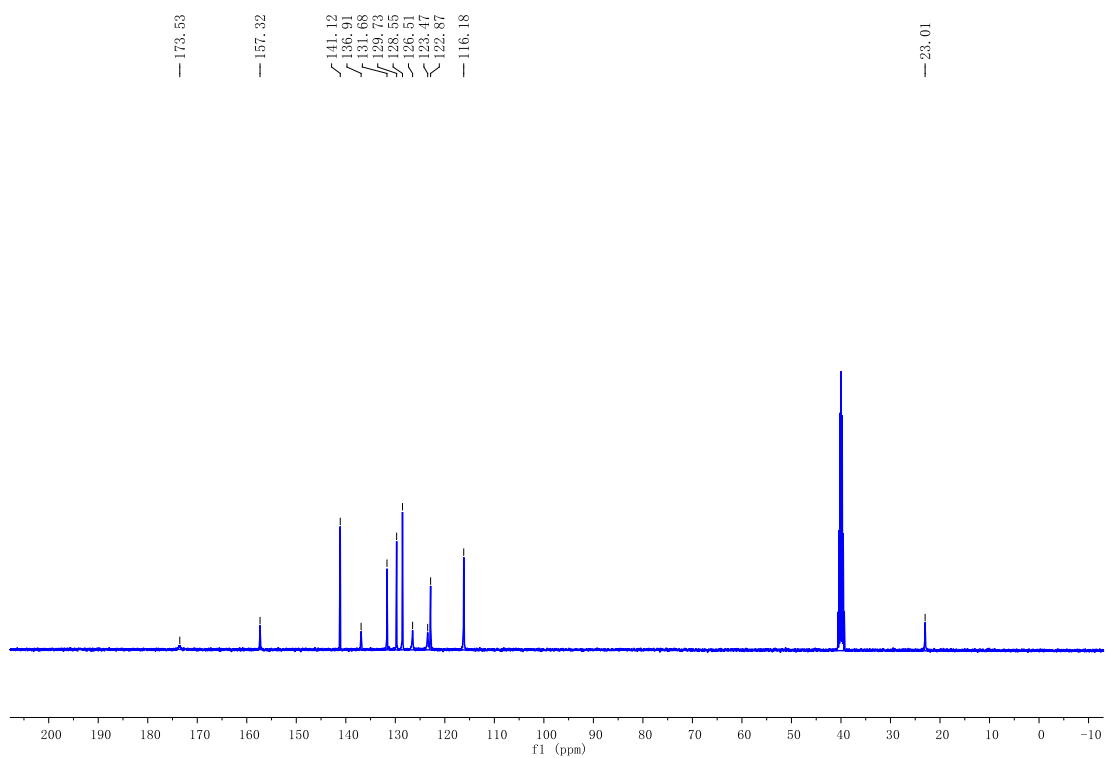

**Supplementary Figure 71.**  $^1\text{H}$  and  $^{13}\text{C}$  NMR spectra for compound **51**

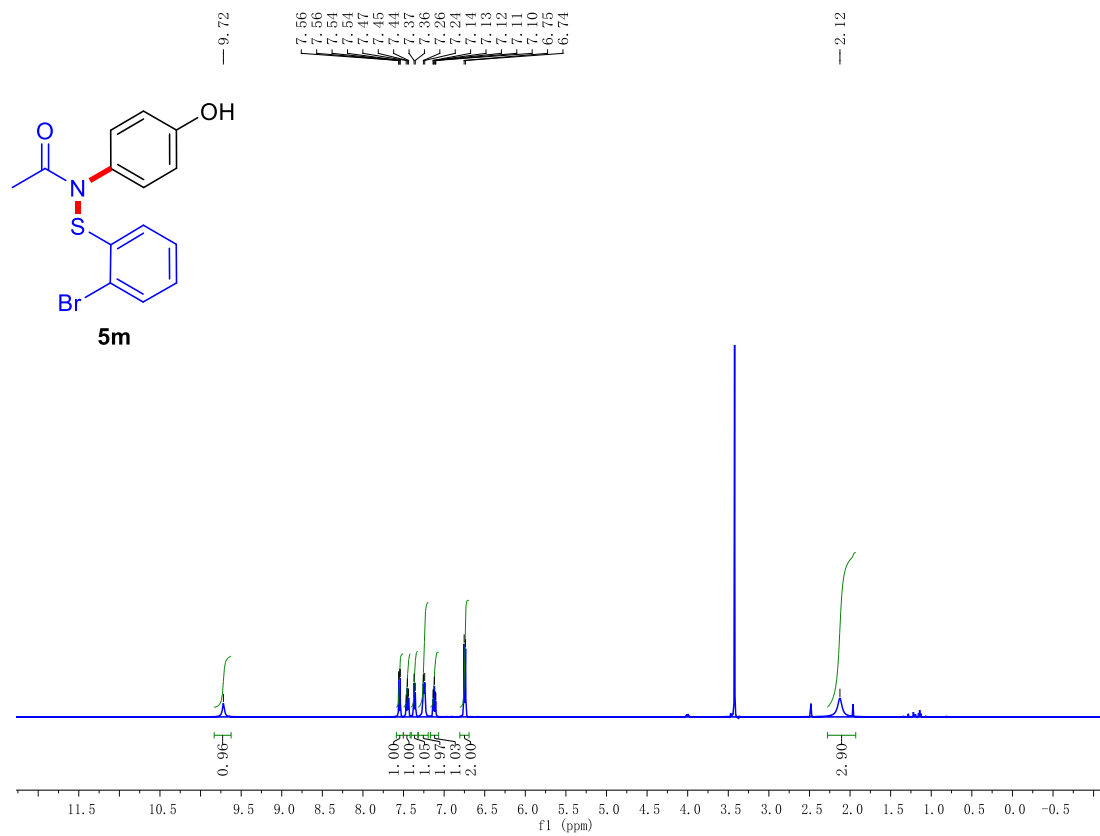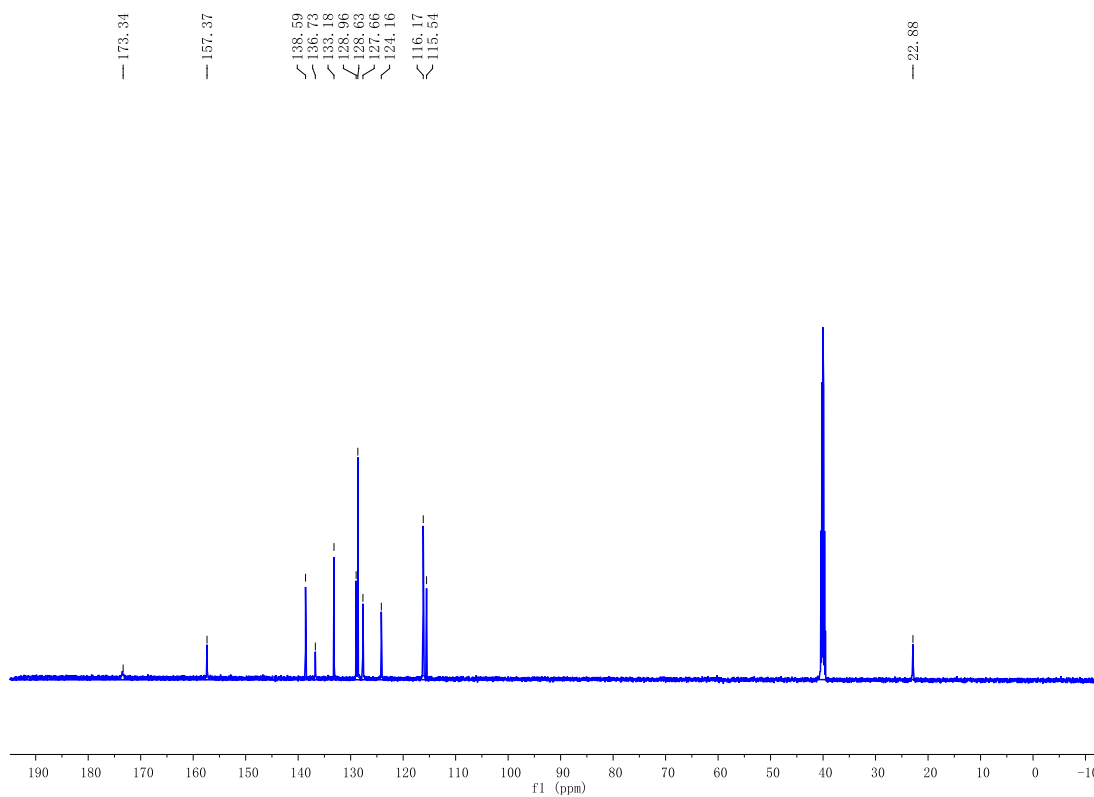

Supplementary Figure 72. <sup>1</sup>H and <sup>13</sup>C NMR spectra for compound **5m**

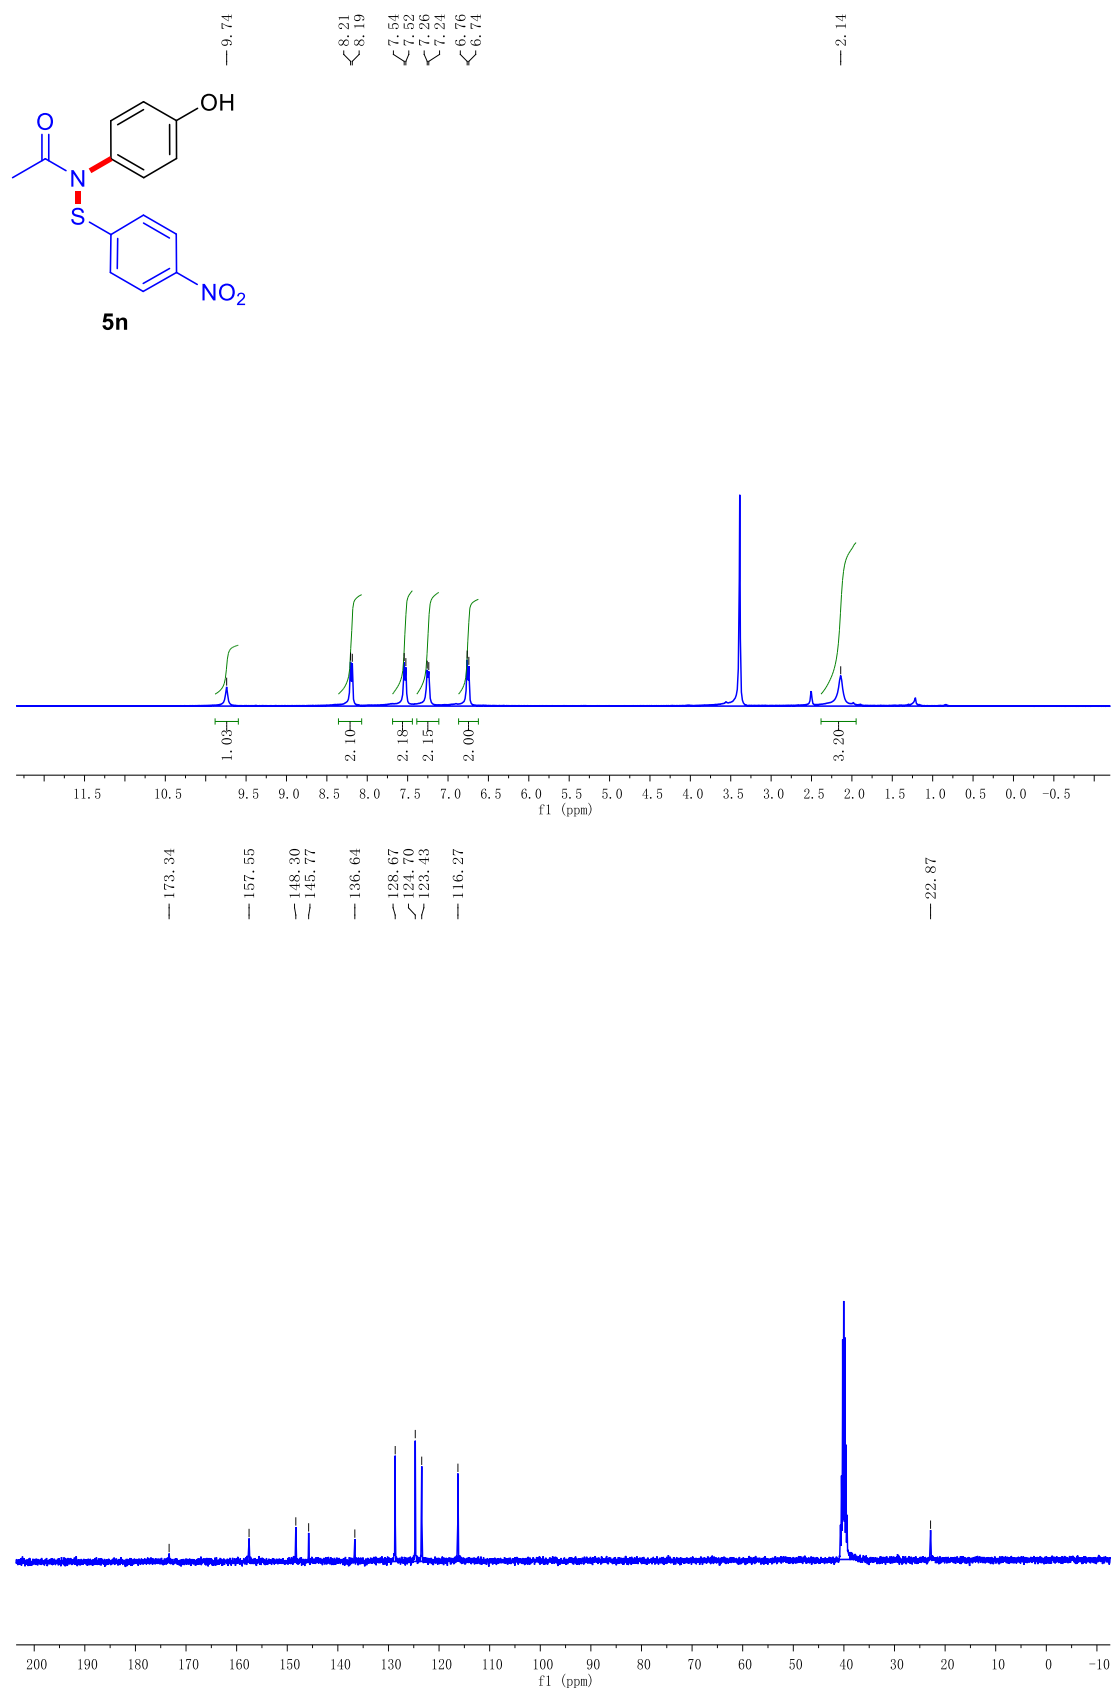

**Supplementary Figure 73.** <sup>1</sup>H and <sup>13</sup>C NMR spectra for compound **5n**

## Supplementary References

1. Nicolaou, K. C., N. Pktasis., N. A. & ClaiumoL, D. A. *N*-phenylselenophthalimide (NPSP) : A valuable selenenylating agent. *Tetrahedron*, **41**, 4835-4841 (1985).
2. Petrassi, H. M., Sharpless, K. B. & Kelly, J. W. The copper-mediated cross-coupling of phenylboronic acids and *N*-hydroxyphthalimide at room temperature: synthesis of aryloxyamines. *Org. Lett.* **3**, 139-142 (2001).
3. Shen, Y., Liu, G., Zhou, Z. & Lu, X. Rhodium(III)-catalyzed C–H olefination for the synthesis of *ortho*-alkenyl phenols using an oxidizing directing group. *Org. Lett.* **15**, 3366-3369 (2013).
4. Li, B., Lan, J., Wu, D. & You, J. Rhodium(III)-catalyzed *ortho*-heteroarylation of phenols through internal oxidative C–H activation: rapid screening of single-molecular white-light-emitting materials. *Angew. Chem. Int. Ed.* **54**, 14008-14012 (2015).
5. Gillis, H. M., Greene, L. & Thompson, A. Preparation of sulfenyl pyrroles. *Synlett* **1**, 112-116 (2009)
6. Frish, M. J., Trucks, G. W., Schlegel, H. B., Scuseria, G. E., Robb, M. A., Cheeseman, J. R., Scalmani, G., Barone, V., Mennucci, B., Petersson, G. A., Nakatsuji, H., Caricato, M., Li, X., Hratchian, H. P., Izmaylov, A. F., Bloino, J., Zheng, G., Sonnenberg, J. L., Hada, M., Ehara, M., Toyota, K., Fukuda, R., Hasegawa, J., Ishida, M., Nakajima, T., Honda, Y., Kitao, O., Nakai, H., Vreven, T., Montgomery, J. A., Jr., Peralta, J. E., Ogliaro, F., Bearpark, M., Heyd, J. J., Brothers, E., Kudin, K. N., Staroverov, V. N., Keith, T., Kobayashi, R., Normand, J., Raghavachari, K., Rendell, A., Burant, J. C., Iyengar, S. S., Tomasi, J., Cossi, M., Rega, N., Millam, J. M., Klene, M., Knox, J. E., Cross, J. B., Bakken, V., Adamo, C., Jaramillo, J., Gomperts, R., Stratmann, R. E., Yazyev, O., Austin, A. J., Cammi, R., Pomelli, C., Ochterski, J. W., Martin, R. L., Morokuma, K., Zakrzewski, V. G., Voth, G. A., Salvador, P., Dannenberg, J. J., Dapprich, S., Daniels, A. D., Farkas, O., Foresman, J. B., Ortiz, J. V., Cioslowski, J. & Fox, D. J. *Gaussian 09, Rev. D.01*, Gaussian, Inc.: Wallingford, CT, 2010.
7. Becke, A. D. Density-functional exchange-energy approximation with correct asymptotic behavior. *Phys. Rev. A: Gen. Phys.* **38**, 3098-3100 (1988);
8. Becke, A. D. Density-functional thermochemistry. III. The role of exact exchange. *J. Chem. Phys.* **98**, 5648-5652 (1993);
9. Grimme, S., Antony, J., Ehrlich, S. & Krieg, H. *J. Chem. Phys.* 2010, **132**, 154104 (2010)
10. Hay, P. J. & Wadt, W. R. *J. Chem. Phys.* 1985, **82**, 299 (1985)
11. Tomasi, J. & Persico, M. Molecular interactions in solution: an overview of methods based on continuous distributions of the solvent. *Chem. Rev.* **94**, 2027-2094 (1994).
