# Supplementary material for: A selenium-catalysed para-amination of phenols
Source: PubMed Central journal article supplement (PMC6191425; doi:10.1038/s41467-018-06763-4), 2018-10-16
Supplement: 41467_2018_6763_MOESM3_ESM.pdf [file 41467_2018_6763_MOESM3_ESM.pdf]

## Description of Additional Supplementary Files

File Name: Supplementary Data 1  
Description: Theoretical Calculations
