# Supplementary material for: A selenium-catalysed para-amination of phenols
Source: PubMed Central journal article supplement (PMC6191425; doi:10.1038/s41467-018-06763-4), 2018-10-16
Supplement: 41467_2018_6763_MOESM4_ESM.pdf [file 41467_2018_6763_MOESM4_ESM.pdf]

**Supplementary Table 16.** Calculated electronic energies of S-mediated reaction in 2,2,2-trifluoroethanol (TFE) at the B3LYP-D3/BS1 level ( $E_1$ , in a.u.), calculated Gibbs free energies in TFE at the B3LYP-D3/BS1 level ( $G_1$ , in a.u.), calculated electronic energies in TFE at the B3LYP-D3/BS2 level ( $E_2$ , in a.u.), corrected free energies ( $G_{\text{correct}}$ , in a.u.) for all stationary points.

| Species                                                                             | $G_1$       | $E_1$       | $E_2$       | $G_{\text{correct}}$ |
|-------------------------------------------------------------------------------------|-------------|-------------|-------------|----------------------|
| <b>1a</b>                                                                           | -515.35704  | -515.47846  | -515.63812  | -515.51671           |
| <b>4g</b>                                                                           | -1142.25001 | -1142.40324 | -1142.6498  | -1142.49659          |
| 2,6-lutidine                                                                        | -326.85751  | -326.97042  | -327.06132  | -326.94841           |
| <b>1a'</b>                                                                          | -514.87327  | -514.98199  | -515.15884  | -515.05011           |
|    | -327.30683  | -327.43211  | -327.51603  | -327.39074           |
|   | -513.06157  | -513.14487  | -513.30282  | -513.21953           |
| <b>TS<sub>SN1</sub></b>                                                             | -1657.11343 | -1657.39952 | -1657.81299 | -1657.52690          |
| <b>INT1-S</b>                                                                       | -1144.54853 | -1144.74199 | -1144.99001 | -1144.79655          |
| <b>TS1-S</b>                                                                        | -1144.52872 | -1144.72192 | -1144.97418 | -1144.78098          |
| <b>INT2-S</b>                                                                       | -1144.54280 | -1144.73629 | -1144.99434 | -1144.80085          |
| <b>TS2-S</b>                                                                        | -1144.53508 | -1144.72803 | -1144.98626 | -1144.79330          |
| <b>INT3-S</b>                                                                       | -1144.57262 | -1144.76905 | -1145.02166 | -1144.82523          |
| <b>5g</b>                                                                           | -1144.61126 | -1144.80326 | -1145.05579 | -1144.8638           |
|  | -512.57768  | -512.64804  | -512.82482  | -512.75447           |
| <b>TS<sub>SN2</sub></b>                                                             | -1657.16958 | -1657.45410 | -1657.87398 | -1657.58946          |

|               |             |             |             |             |
|---------------|-------------|-------------|-------------|-------------|
| <b>4a</b>     | -515.42528  | -515.54738  | -515.71014  | -515.58804  |
| <b>TS2'-S</b> | -1471.3883  | -1471.71201 | -1472.05404 | -1471.73037 |
| <b>5g'</b>    | -1144.57564 | -1144.76761 | -1145.02606 | -1144.83409 |

---

**1a**

| Center Number | Atomic Number | Atomic Type | Coordinates (in Å) |           |           |
|---------------|---------------|-------------|--------------------|-----------|-----------|
|               |               |             | X                  | Y         | Z         |
| 1             | 6             | 0           | -3.470531          | -0.101513 | -1.165843 |
| 2             | 6             | 0           | -2.298284          | 0.014001  | -0.416173 |
| 3             | 6             | 0           | -2.179331          | -0.576697 | 0.839197  |
| 4             | 6             | 0           | -3.262982          | -1.299885 | 1.345216  |
| 5             | 6             | 0           | -4.442438          | -1.428867 | 0.612511  |
| 6             | 6             | 0           | -4.540093          | -0.825770 | -0.644954 |
| 7             | 1             | 0           | -3.527710          | 0.373868  | -2.139110 |
| 8             | 1             | 0           | -1.261234          | -0.474577 | 1.402824  |
| 9             | 1             | 0           | -3.176065          | -1.763433 | 2.322973  |
| 10            | 1             | 0           | -5.277740          | -1.992287 | 1.014757  |
| 11            | 1             | 0           | -5.452587          | -0.917956 | -1.225468 |
| 12            | 8             | 0           | -1.295806          | 0.764652  | -1.024940 |
| 13            | 7             | 0           | -0.111715          | 0.847651  | -0.278273 |
| 14            | 1             | 0           | 0.636453           | 0.314729  | -0.710969 |
| 15            | 6             | 0           | 0.224647           | 2.085839  | 0.239406  |
| 16            | 6             | 0           | -0.916723          | 3.053793  | 0.425451  |
| 17            | 1             | 0           | -1.318280          | 3.353840  | -0.546584 |
| 18            | 1             | 0           | -1.733048          | 2.591040  | 0.986715  |
| 19            | 1             | 0           | -0.546514          | 3.928398  | 0.958642  |
| 20            | 8             | 0           | 1.385538           | 2.301765  | 0.562133  |

**4g**

| Center Number | Atomic Number | Atomic Type | Coordinates (in Å) |           |           |
|---------------|---------------|-------------|--------------------|-----------|-----------|
|               |               |             | X                  | Y         | Z         |
| 1             | 6             | 0           | -6.020923          | -1.507346 | 0.253753  |
| 2             | 6             | 0           | -6.558600          | -0.336666 | 0.796923  |
| 3             | 6             | 0           | -7.896309          | -0.250016 | 1.151894  |
| 4             | 6             | 0           | -8.691559          | -1.384696 | 0.946024  |
| 5             | 6             | 0           | -8.152907          | -2.557269 | 0.401842  |
| 6             | 6             | 0           | -6.800657          | -2.634935 | 0.044926  |
| 7             | 6             | 0           | -4.578548          | -1.283767 | -0.028775 |
| 8             | 6             | 0           | -5.482428          | 0.685599  | 0.886357  |

|    |    |   |           |           |           |
|----|----|---|-----------|-----------|-----------|
| 9  | 1  | 0 | -8.306822 | 0.661690  | 1.571258  |
| 10 | 1  | 0 | -9.743019 | -1.356073 | 1.211178  |
| 11 | 1  | 0 | -8.795351 | -3.418718 | 0.254034  |
| 12 | 1  | 0 | -6.376749 | -3.538669 | -0.378351 |
| 13 | 8  | 0 | -5.543646 | 1.833211  | 1.273065  |
| 14 | 8  | 0 | -3.769415 | -2.036364 | -0.529082 |
| 15 | 7  | 0 | -4.313081 | 0.042285  | 0.402001  |
| 16 | 16 | 0 | -2.779665 | 0.812480  | 0.262451  |
| 17 | 6  | 0 | -2.921680 | 1.533397  | -1.372336 |
| 18 | 6  | 0 | -2.645817 | 0.754817  | -2.503163 |
| 19 | 6  | 0 | -3.298085 | 2.874689  | -1.505705 |
| 20 | 6  | 0 | -2.754010 | 1.323696  | -3.771457 |
| 21 | 1  | 0 | -2.362955 | -0.284708 | -2.381411 |
| 22 | 6  | 0 | -3.395656 | 3.438082  | -2.778242 |
| 23 | 1  | 0 | -3.519209 | 3.460851  | -0.620731 |
| 24 | 6  | 0 | -3.125188 | 2.663759  | -3.908411 |
| 25 | 1  | 0 | -2.545143 | 0.723573  | -4.651220 |
| 26 | 1  | 0 | -3.686825 | 4.477877  | -2.886686 |
| 27 | 1  | 0 | -3.204019 | 3.104470  | -4.897154 |

---

2,6-lutidine

---

| Center<br>Number | Atomic<br>Number | Atomic<br>Type | Coordinates (in Å) |           |           |
|------------------|------------------|----------------|--------------------|-----------|-----------|
|                  |                  |                | X                  | Y         | Z         |
| 1                | 6                | 0              | 1.913685           | 0.269404  | 0.000282  |
| 2                | 6                | 0              | 2.648458           | 1.460494  | -0.000302 |
| 3                | 6                | 0              | 1.963098           | 2.672326  | -0.001142 |
| 4                | 6                | 0              | 0.570984           | 2.660104  | -0.001288 |
| 5                | 6                | 0              | -0.093325          | 1.428274  | -0.000566 |
| 6                | 1                | 0              | 3.733238           | 1.431025  | -0.000092 |
| 7                | 1                | 0              | 2.506101           | 3.612611  | -0.001664 |
| 8                | 1                | 0              | 0.003116           | 3.584868  | -0.001963 |
| 9                | 7                | 0              | 0.568645           | 0.257412  | 0.000206  |
| 10               | 6                | 0              | 2.608677           | -1.069121 | 0.001830  |
| 11               | 1                | 0              | 3.253053           | -1.180273 | -0.877018 |
| 12               | 1                | 0              | 3.246558           | -1.181500 | 0.885291  |
| 13               | 1                | 0              | 1.869531           | -1.871814 | -0.001286 |
| 14               | 6                | 0              | -1.600036          | 1.361292  | -0.000977 |
| 15               | 1                | 0              | -2.017519          | 1.863029  | 0.878753  |
| 16               | 1                | 0              | -2.016809          | 1.858859  | -0.883426 |
| 17               | 1                | 0              | -1.926007          | 0.320004  | 0.001281  |

---

1a'

---

| Center | Atomic | Atomic | Coordinates (in Å) |  |  |
|--------|--------|--------|--------------------|--|--|
|--------|--------|--------|--------------------|--|--|

| Number | Number | Type | X         | Y         | Z         |
|--------|--------|------|-----------|-----------|-----------|
| 1      | 6      | 0    | -4.273319 | 0.002644  | 0.955149  |
| 2      | 6      | 0    | -3.550229 | -0.000397 | -0.250055 |
| 3      | 6      | 0    | -4.252373 | -0.003979 | -1.471393 |
| 4      | 6      | 0    | -5.643130 | -0.004499 | -1.483474 |
| 5      | 6      | 0    | -6.367778 | -0.001479 | -0.285767 |
| 6      | 6      | 0    | -5.669292 | 0.002068  | 0.922689  |
| 7      | 1      | 0    | -3.728441 | 0.005388  | 1.888358  |
| 8      | 1      | 0    | -3.683324 | -0.006306 | -2.396112 |
| 9      | 1      | 0    | -6.165875 | -0.007286 | -2.436184 |
| 10     | 1      | 0    | -7.453158 | -0.001891 | -0.297510 |
| 11     | 1      | 0    | -6.216303 | 0.004444  | 1.862229  |
| 12     | 8      | 0    | -2.205928 | -0.000187 | -0.343975 |
| 13     | 7      | 0    | -1.535860 | 0.003710  | 0.966884  |
| 14     | 6      | 0    | -0.223523 | 0.003252  | 0.743317  |
| 15     | 6      | 0    | 0.543394  | 0.006967  | 2.070182  |
| 16     | 1      | 0    | -0.115702 | 0.009327  | 2.941674  |
| 17     | 1      | 0    | 1.193304  | -0.874131 | 2.116301  |
| 18     | 1      | 0    | 1.193161  | 0.888411  | 2.111426  |
| 19     | 8      | 0    | 0.419885  | 0.000059  | -0.337964 |

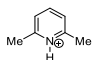

| Center Number | Atomic Number | Atomic Type | Coordinates (in Å) |          |           |
|---------------|---------------|-------------|--------------------|----------|-----------|
|               |               |             | X                  | Y        | Z         |
| 1             | 6             | 0           | -1.717004          | 2.302368 | 1.639257  |
| 2             | 6             | 0           | -0.553890          | 3.058330 | 1.604445  |
| 3             | 6             | 0           | 0.038509           | 3.355569 | 0.377959  |
| 4             | 6             | 0           | -0.528703          | 2.896567 | -0.809837 |
| 5             | 6             | 0           | -1.690214          | 2.138592 | -0.766883 |
| 6             | 1             | 0           | -0.124517          | 3.407619 | 2.534282  |
| 7             | 1             | 0           | 0.945917           | 3.948208 | 0.347854  |
| 8             | 1             | 0           | -0.080396          | 3.119428 | -1.769212 |
| 9             | 7             | 0           | -2.225843          | 1.880468 | 0.453428  |
| 10            | 6             | 0           | -2.448715          | 1.923112 | 2.885619  |
| 11            | 1             | 0           | -2.510782          | 0.834745 | 2.981214  |
| 12            | 1             | 0           | -1.934453          | 2.321585 | 3.759387  |
| 13            | 1             | 0           | -3.468985          | 2.318876 | 2.869624  |
| 14            | 6             | 0           | -2.387800          | 1.581543 | -1.965118 |
| 15            | 1             | 0           | -3.432744          | 1.904741 | -1.992001 |
| 16            | 1             | 0           | -1.894259          | 1.917244 | -2.876398 |
| 17            | 1             | 0           | -2.373022          | 0.487067 | -1.943019 |
| 18            | 1             | 0           | -3.079362          | 1.328139 | 0.480452  |

TSsN1

| Center<br>Number | Atomic<br>Number | Atomic<br>Type | Coordinates (in Å) |           |           |
|------------------|------------------|----------------|--------------------|-----------|-----------|
|                  |                  |                | X                  | Y         | Z         |
| 1                | 6                | 0              | -4.676327          | 2.007029  | 1.892163  |
| 2                | 6                | 0              | -4.649403          | 2.684907  | 0.669260  |
| 3                | 6                | 0              | -4.017889          | 2.123088  | -0.437555 |
| 4                | 6                | 0              | -3.410070          | 0.865602  | -0.325995 |
| 5                | 6                | 0              | -3.434283          | 0.174067  | 0.888648  |
| 6                | 6                | 0              | -4.065325          | 0.755971  | 1.989593  |
| 7                | 1                | 0              | -5.163401          | 2.450374  | 2.754737  |
| 8                | 1                | 0              | -5.118779          | 3.659860  | 0.575817  |
| 9                | 1                | 0              | -3.983949          | 2.640630  | -1.390802 |
| 10               | 1                | 0              | -2.948106          | -0.788270 | 0.963684  |
| 11               | 1                | 0              | -4.073009          | 0.219013  | 2.933922  |
| 12               | 8                | 0              | -2.827377          | 0.386738  | -1.472462 |
| 13               | 7                | 0              | -2.050649          | -0.800598 | -1.273413 |
| 14               | 6                | 0              | -2.549069          | -1.863960 | -1.940032 |
| 15               | 6                | 0              | -3.909784          | -1.724508 | -2.612020 |
| 16               | 1                | 0              | -4.674157          | -1.417463 | -1.892296 |
| 17               | 1                | 0              | -3.884711          | -0.963675 | -3.397223 |
| 18               | 1                | 0              | -4.179255          | -2.689282 | -3.043319 |
| 19               | 8                | 0              | -1.926573          | -2.943639 | -1.976296 |
| 20               | 16               | 0              | 0.007291           | -0.397447 | -0.980844 |
| 21               | 6                | 0              | 2.892854           | -0.999081 | -0.615386 |
| 22               | 6                | 0              | 2.420693           | 1.228837  | -0.337621 |
| 23               | 7                | 0              | 1.894125           | -0.029844 | -0.598619 |
| 24               | 8                | 0              | 2.735312           | -2.198046 | -0.798045 |
| 25               | 8                | 0              | 1.789971           | 2.272776  | -0.225055 |
| 26               | 6                | 0              | 3.904729           | 1.062242  | -0.193178 |
| 27               | 6                | 0              | 4.901606           | 1.989110  | 0.067804  |
| 28               | 6                | 0              | 6.217561           | 1.513287  | 0.158883  |
| 29               | 6                | 0              | 6.505991           | 0.153356  | -0.006725 |
| 30               | 1                | 0              | 7.534207           | -0.185380 | 0.070291  |
| 31               | 6                | 0              | 5.487984           | -0.775021 | -0.268581 |
| 32               | 1                | 0              | 5.704244           | -1.830538 | -0.395688 |
| 33               | 6                | 0              | 4.191704           | -0.292668 | -0.357662 |
| 34               | 1                | 0              | 7.026443           | 2.207877  | 0.361704  |
| 35               | 1                | 0              | 4.670169           | 3.041209  | 0.196806  |
| 36               | 6                | 0              | -0.212564          | -0.949479 | 0.723723  |
| 37               | 6                | 0              | -0.672404          | -2.244207 | 0.981190  |
| 38               | 6                | 0              | 0.047142           | -0.075171 | 1.783004  |
| 39               | 6                | 0              | -0.883401          | -2.654523 | 2.298507  |
| 40               | 1                | 0              | -0.897900          | -2.896933 | 0.144320  |
| 41               | 6                | 0              | -0.154712          | -0.496267 | 3.097766  |

|    |   |   |           |           |          |
|----|---|---|-----------|-----------|----------|
| 42 | 1 | 0 | 0.395866  | 0.930133  | 1.574778 |
| 43 | 6 | 0 | -0.624643 | -1.784786 | 3.360667 |
| 44 | 1 | 0 | -1.247106 | -3.659111 | 2.494907 |
| 45 | 1 | 0 | 0.042490  | 0.189534  | 3.916557 |
| 46 | 1 | 0 | -0.788956 | -2.107892 | 4.384133 |

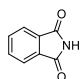

| Center Number | Atomic Number | Atomic Type | Coordinates (in Å) |           |           |
|---------------|---------------|-------------|--------------------|-----------|-----------|
|               |               |             | X                  | Y         | Z         |
| 1             | 6             | 0           | -6.022714          | -1.507646 | 0.251345  |
| 2             | 6             | 0           | -6.560452          | -0.337050 | 0.795031  |
| 3             | 6             | 0           | -7.897532          | -0.250417 | 1.150213  |
| 4             | 6             | 0           | -8.693684          | -1.384793 | 0.942989  |
| 5             | 6             | 0           | -8.155177          | -2.556977 | 0.398574  |
| 6             | 6             | 0           | -6.802124          | -2.634771 | 0.042706  |
| 7             | 6             | 0           | -4.573774          | -1.276414 | -0.019520 |
| 8             | 6             | 0           | -5.472093          | 0.679360  | 0.888681  |
| 9             | 1             | 0           | -8.308438          | 0.660480  | 1.571439  |
| 10            | 1             | 0           | -9.745217          | -1.356263 | 1.208244  |
| 11            | 1             | 0           | -8.797807          | -3.418366 | 0.250537  |
| 12            | 1             | 0           | -6.378765          | -3.539472 | -0.379522 |
| 13            | 8             | 0           | -5.521437          | 1.821483  | 1.304228  |
| 14            | 8             | 0           | -3.748898          | -2.037772 | -0.488028 |
| 15            | 7             | 0           | -4.333054          | 0.041287  | 0.385187  |
| 16            | 1             | 0           | -3.427326          | 0.486221  | 0.323174  |

### INT1-S

| Center Number | Atomic Number | Atomic Type | Coordinates (in Å) |           |           |
|---------------|---------------|-------------|--------------------|-----------|-----------|
|               |               |             | X                  | Y         | Z         |
| 1             | 6             | 0           | 1.884852           | -1.631350 | -0.948751 |
| 2             | 6             | 0           | 2.244046           | -1.002323 | 0.240383  |
| 3             | 6             | 0           | 3.555275           | -1.035309 | 0.714236  |
| 4             | 6             | 0           | 4.524439           | -1.714889 | -0.021392 |
| 5             | 6             | 0           | 4.188296           | -2.345836 | -1.222106 |
| 6             | 6             | 0           | 2.870864           | -2.298145 | -1.678605 |
| 7             | 1             | 0           | 0.868085           | -1.582575 | -1.313656 |
| 8             | 1             | 0           | 5.546564           | -1.741926 | 0.342507  |
| 9             | 1             | 0           | 4.947482           | -2.865402 | -1.797082 |
| 10            | 1             | 0           | 2.598314           | -2.780327 | -2.611959 |
| 11            | 8             | 0           | 1.344349           | -0.324225 | 1.066016  |
| 12            | 7             | 0           | 0.126932           | 0.003375  | 0.441510  |

|    |    |   |           |           |           |
|----|----|---|-----------|-----------|-----------|
| 13 | 6  | 0 | -0.989446 | -0.740400 | 0.818896  |
| 14 | 6  | 0 | -0.702853 | -1.922331 | 1.714316  |
| 15 | 1  | 0 | -0.247884 | -1.595337 | 2.652263  |
| 16 | 1  | 0 | -1.645168 | -2.431610 | 1.911326  |
| 17 | 1  | 0 | -0.003834 | -2.611632 | 1.233277  |
| 18 | 8  | 0 | -2.100685 | -0.443300 | 0.408698  |
| 19 | 6  | 0 | 1.578378  | 1.064226  | -4.091928 |
| 20 | 6  | 0 | 1.407589  | 1.446522  | -2.760894 |
| 21 | 6  | 0 | 0.261678  | 1.042496  | -2.069729 |
| 22 | 6  | 0 | -0.715537 | 0.262728  | -2.701525 |
| 23 | 6  | 0 | -0.523236 | -0.136217 | -4.023009 |
| 24 | 6  | 0 | 0.620184  | 0.266222  | -4.719171 |
| 25 | 1  | 0 | 2.467891  | 1.373901  | -4.630988 |
| 26 | 1  | 0 | 2.163489  | 2.037464  | -2.255151 |
| 27 | 1  | 0 | -1.597917 | -0.039178 | -2.148254 |
| 28 | 1  | 0 | -1.269751 | -0.753159 | -4.512960 |
| 29 | 1  | 0 | 0.762874  | -0.042334 | -5.749841 |
| 30 | 1  | 0 | 3.797873  | -0.530625 | 1.642982  |
| 31 | 16 | 0 | 0.051500  | 1.524227  | -0.356613 |

---

### TS1-S

---

| Center<br>Number | Atomic<br>Number | Atomic<br>Type | Coordinates (in Å) |           |           |
|------------------|------------------|----------------|--------------------|-----------|-----------|
|                  |                  |                | X                  | Y         | Z         |
| 1                | 6                | 0              | -2.280140          | -2.127846 | 0.341627  |
| 2                | 6                | 0              | -1.615566          | -1.756995 | -0.853344 |
| 3                | 6                | 0              | -2.345153          | -1.079026 | -1.865377 |
| 4                | 6                | 0              | -3.689627          | -0.813074 | -1.693748 |
| 5                | 6                | 0              | -4.336395          | -1.184204 | -0.499787 |
| 6                | 6                | 0              | -3.637483          | -1.846327 | 0.506670  |
| 7                | 1                | 0              | -1.716693          | -2.659240 | 1.099914  |
| 8                | 1                | 0              | -4.246963          | -0.297306 | -2.469076 |
| 9                | 1                | 0              | -5.388916          | -0.955496 | -0.366620 |
| 10               | 1                | 0              | -4.143749          | -2.134421 | 1.422276  |
| 11               | 8                | 0              | -0.325548          | -1.970949 | -0.986290 |
| 12               | 7                | 0              | 0.541527           | -0.497119 | -0.138277 |
| 13               | 6                | 0              | 1.825338           | -1.003119 | 0.151477  |
| 14               | 6                | 0              | 2.386767           | -1.926903 | -0.897579 |
| 15               | 1                | 0              | 2.139276           | -1.579616 | -1.901411 |
| 16               | 1                | 0              | 3.466075           | -1.993925 | -0.761606 |
| 17               | 1                | 0              | 1.936835           | -2.916044 | -0.778698 |
| 18               | 8                | 0              | 2.452211           | -0.653200 | 1.141695  |
| 19               | 6                | 0              | -3.440426          | 2.526417  | 0.213639  |
| 20               | 6                | 0              | -2.626023          | 1.566635  | 0.816661  |
| 21               | 6                | 0              | -1.357290          | 1.318898  | 0.286468  |

|    |    |   |           |           |           |
|----|----|---|-----------|-----------|-----------|
| 22 | 6  | 0 | -0.893432 | 2.015894  | -0.832719 |
| 23 | 6  | 0 | -1.721744 | 2.960056  | -1.432568 |
| 24 | 6  | 0 | -2.994509 | 3.218160  | -0.912068 |
| 25 | 1  | 0 | -4.429652 | 2.717779  | 0.616540  |
| 26 | 1  | 0 | -2.982309 | 1.002244  | 1.671511  |
| 27 | 1  | 0 | 0.089205  | 1.796791  | -1.233768 |
| 28 | 1  | 0 | -1.372105 | 3.500191  | -2.306679 |
| 29 | 1  | 0 | -3.634462 | 3.955639  | -1.385441 |
| 30 | 1  | 0 | -1.813509 | -0.770395 | -2.759136 |
| 31 | 16 | 0 | -0.363725 | 0.083506  | 1.105199  |

---

**INT2-S**

---

| Center<br>Number | Atomic<br>Number | Atomic<br>Type | Coordinates (in Å) |           |           |
|------------------|------------------|----------------|--------------------|-----------|-----------|
|                  |                  |                | X                  | Y         | Z         |
| 1                | 6                | 0              | -1.590106          | -1.454064 | 0.234832  |
| 2                | 6                | 0              | -1.589403          | -1.463632 | -1.273506 |
| 3                | 6                | 0              | -2.823577          | -1.039437 | -1.927975 |
| 4                | 6                | 0              | -3.961053          | -0.860405 | -1.212703 |
| 5                | 6                | 0              | -4.007177          | -1.056955 | 0.224547  |
| 6                | 6                | 0              | -2.891238          | -1.367779 | 0.918259  |
| 7                | 1                | 0              | -0.887718          | -2.182788 | 0.641934  |
| 8                | 1                | 0              | -4.878256          | -0.575910 | -1.719416 |
| 9                | 1                | 0              | -4.962359          | -0.966468 | 0.730238  |
| 10               | 1                | 0              | -2.918402          | -1.520062 | 1.992234  |
| 11               | 8                | 0              | -0.565799          | -1.766614 | -1.890702 |
| 12               | 7                | 0              | 0.803158           | 0.204833  | -0.168570 |
| 13               | 6                | 0              | 1.645572           | -0.802924 | 0.203572  |
| 14               | 6                | 0              | 2.941215           | -0.828655 | -0.580726 |
| 15               | 1                | 0              | 3.756205           | -1.156209 | 0.067991  |
| 16               | 1                | 0              | 2.840773           | -1.557122 | -1.392495 |
| 17               | 1                | 0              | 3.172083           | 0.143706  | -1.017942 |
| 18               | 8                | 0              | 1.393052           | -1.665786 | 1.064483  |
| 19               | 6                | 0              | -3.434907          | 2.912924  | 0.019371  |
| 20               | 6                | 0              | -2.622035          | 1.961925  | 0.638307  |
| 21               | 6                | 0              | -1.533194          | 1.445033  | -0.065782 |
| 22               | 6                | 0              | -1.226962          | 1.869055  | -1.360505 |
| 23               | 6                | 0              | -2.040903          | 2.826053  | -1.960426 |
| 24               | 6                | 0              | -3.146042          | 3.341557  | -1.276235 |
| 25               | 1                | 0              | -4.286799          | 3.319455  | 0.553673  |
| 26               | 1                | 0              | -2.834890          | 1.629676  | 1.648121  |
| 27               | 1                | 0              | -0.368329          | 1.447381  | -1.867425 |
| 28               | 1                | 0              | -1.816425          | 3.165858  | -2.966073 |
| 29               | 1                | 0              | -3.778023          | 4.083928  | -1.752689 |
| 30               | 1                | 0              | -2.796769          | -0.922610 | -3.005887 |



31 16 0 -0.569464 0.175678 0.746901

---

**TS2-S**

---

| Center Number | Atomic Number | Atomic Type | Coordinates (in Å) |           |           |
|---------------|---------------|-------------|--------------------|-----------|-----------|
|               |               |             | X                  | Y         | Z         |
| 1             | 6             | 0           | -1.450404          | -2.027114 | 0.176053  |
| 2             | 6             | 0           | -1.608165          | -1.477727 | -1.189566 |
| 3             | 6             | 0           | -2.841377          | -0.723949 | -1.427072 |
| 4             | 6             | 0           | -3.804285          | -0.653071 | -0.468063 |
| 5             | 6             | 0           | -3.634635          | -1.279193 | 0.811882  |
| 6             | 6             | 0           | -2.510556          | -2.045913 | 1.078873  |
| 7             | 1             | 0           | -0.538259          | -2.583501 | 0.365594  |
| 8             | 1             | 0           | -4.718524          | -0.098568 | -0.655148 |
| 9             | 1             | 0           | -4.434235          | -1.209955 | 1.540391  |
| 10            | 1             | 0           | -2.394701          | -2.532032 | 2.040912  |
| 11            | 8             | 0           | -0.746167          | -1.651103 | -2.062645 |
| 12            | 7             | 0           | -2.042134          | 0.857750  | 1.606538  |
| 13            | 6             | 0           | -2.678918          | 1.798321  | 0.799124  |
| 14            | 6             | 0           | -3.973984          | 2.303718  | 1.396329  |
| 15            | 1             | 0           | -3.763582          | 3.201306  | 1.988449  |
| 16            | 1             | 0           | -4.661664          | 2.580053  | 0.595385  |
| 17            | 1             | 0           | -4.430483          | 1.562431  | 2.052903  |
| 18            | 8             | 0           | -2.238952          | 2.221319  | -0.270017 |
| 19            | 6             | 0           | 2.024956           | -1.619405 | 3.263915  |
| 20            | 6             | 0           | 1.398923           | -0.964332 | 2.205834  |
| 21            | 6             | 0           | 0.094989           | -0.483841 | 2.376902  |
| 22            | 6             | 0           | -0.587024          | -0.649267 | 3.584967  |
| 23            | 6             | 0           | 0.053633           | -1.305335 | 4.634677  |
| 24            | 6             | 0           | 1.354173           | -1.791466 | 4.477376  |
| 25            | 1             | 0           | 3.035696           | -1.993528 | 3.140339  |
| 26            | 1             | 0           | 1.915726           | -0.829006 | 1.260504  |
| 27            | 1             | 0           | -1.593600          | -0.263193 | 3.683531  |
| 28            | 1             | 0           | -0.465917          | -1.438245 | 5.578068  |
| 29            | 1             | 0           | 1.844960           | -2.301975 | 5.299420  |
| 30            | 1             | 0           | -2.967758          | -0.267979 | -2.402655 |
| 31            | 16            | 0           | -0.642871          | 0.317088  | 0.971367  |

---

**INT3-S**

---

| Center Number | Atomic Number | Atomic Type | Coordinates (in Å) |           |           |
|---------------|---------------|-------------|--------------------|-----------|-----------|
|               |               |             | X                  | Y         | Z         |
| 1             | 6             | 0           | -2.246974          | -1.913681 | 0.453174  |
| 2             | 6             | 0           | -1.790468          | -2.497680 | -0.823154 |

|    |    |   |           |           |           |
|----|----|---|-----------|-----------|-----------|
| 3  | 6  | 0 | -2.248520 | -1.833252 | -2.060262 |
| 4  | 6  | 0 | -3.055787 | -0.765144 | -2.029512 |
| 5  | 6  | 0 | -3.598930 | -0.195274 | -0.750298 |
| 6  | 6  | 0 | -3.058136 | -0.848859 | 0.491350  |
| 7  | 1  | 0 | -1.876367 | -2.381417 | 1.359672  |
| 8  | 1  | 0 | -3.375377 | -0.270316 | -2.942394 |
| 9  | 1  | 0 | -4.680003 | -0.378272 | -0.761265 |
| 10 | 1  | 0 | -3.371604 | -0.410977 | 1.434299  |
| 11 | 8  | 0 | -1.051642 | -3.483648 | -0.855596 |
| 12 | 7  | 0 | -3.416945 | 1.270499  | -0.702071 |
| 13 | 6  | 0 | -4.450089 | 2.187187  | -0.535367 |
| 14 | 6  | 0 | -5.867484 | 1.644541  | -0.549554 |
| 15 | 1  | 0 | -6.541097 | 2.495978  | -0.465320 |
| 16 | 1  | 0 | -6.087333 | 1.103808  | -1.474225 |
| 17 | 1  | 0 | -6.045560 | 0.969701  | 0.293024  |
| 18 | 8  | 0 | -4.228582 | 3.381765  | -0.387387 |
| 19 | 6  | 0 | 0.292048  | 0.982799  | 2.592003  |
| 20 | 6  | 0 | -0.149378 | 1.015962  | 1.268888  |
| 21 | 6  | 0 | -1.267423 | 1.785600  | 0.929728  |
| 22 | 6  | 0 | -1.949716 | 2.515557  | 1.912050  |
| 23 | 6  | 0 | -1.519975 | 2.450385  | 3.236571  |
| 24 | 6  | 0 | -0.397219 | 1.691067  | 3.577690  |
| 25 | 1  | 0 | 1.160205  | 0.386556  | 2.854330  |
| 26 | 1  | 0 | 0.357411  | 0.436205  | 0.504936  |
| 27 | 1  | 0 | -2.805458 | 3.119269  | 1.633412  |
| 28 | 1  | 0 | -2.054030 | 3.005103  | 4.001720  |
| 29 | 1  | 0 | -0.062118 | 1.651346  | 4.609234  |
| 30 | 1  | 0 | -1.884017 | -2.247533 | -2.994918 |
| 31 | 16 | 0 | -1.780322 | 1.840829  | -0.785903 |

---

**5g**

---

| Center<br>Number | Atomic<br>Number | Atomic<br>Type | X         | Coordinates (in Å)<br>Y Z |           |
|------------------|------------------|----------------|-----------|---------------------------|-----------|
| 1                | 6                | 0              | -1.556044 | -1.812050                 | 0.300534  |
| 2                | 6                | 0              | -1.936489 | -1.928475                 | -1.041657 |
| 3                | 6                | 0              | -3.294613 | -1.956256                 | -1.386477 |
| 4                | 6                | 0              | -4.261505 | -1.872548                 | -0.391830 |
| 5                | 6                | 0              | -3.885603 | -1.765366                 | 0.950585  |
| 6                | 6                | 0              | -2.531242 | -1.726827                 | 1.291303  |
| 7                | 1                | 0              | -5.315649 | -1.892653                 | -0.647731 |
| 8                | 1                | 0              | -2.245791 | -1.630077                 | 2.332943  |
| 9                | 8                | 0              | -1.033317 | -2.018656                 | -2.057558 |
| 10               | 7                | 0              | -4.885167 | -1.660451                 | 1.974365  |
| 11               | 6                | 0              | -5.272229 | -2.737463                 | 2.764984  |

|    |    |   |           |           |           |
|----|----|---|-----------|-----------|-----------|
| 12 | 6  | 0 | -4.742570 | -4.088372 | 2.325690  |
| 13 | 1  | 0 | -5.247805 | -4.856005 | 2.910790  |
| 14 | 1  | 0 | -4.907173 | -4.257364 | 1.259435  |
| 15 | 1  | 0 | -3.665148 | -4.150065 | 2.502615  |
| 16 | 8  | 0 | -5.993935 | -2.604749 | 3.744847  |
| 17 | 6  | 0 | -2.422689 | 2.204375  | 3.790626  |
| 18 | 6  | 0 | -3.451991 | 1.705016  | 2.989731  |
| 19 | 6  | 0 | -4.136637 | 0.549779  | 3.380706  |
| 20 | 6  | 0 | -3.785132 | -0.114784 | 4.564348  |
| 21 | 6  | 0 | -2.736555 | 0.373657  | 5.340798  |
| 22 | 6  | 0 | -2.058744 | 1.536094  | 4.959811  |
| 23 | 1  | 0 | -1.894086 | 3.102849  | 3.488275  |
| 24 | 1  | 0 | -3.718783 | 2.202349  | 2.063159  |
| 25 | 1  | 0 | -4.329856 | -1.004444 | 4.859798  |
| 26 | 1  | 0 | -2.456290 | -0.144806 | 6.252395  |
| 27 | 1  | 0 | -1.248730 | 1.917325  | 5.573390  |
| 28 | 1  | 0 | -3.571993 | -2.045299 | -2.430983 |
| 29 | 16 | 0 | -5.466498 | -0.064280 | 2.351965  |
| 30 | 1  | 0 | -0.135707 | -1.993095 | -1.696960 |
| 31 | 1  | 0 | -0.503684 | -1.786446 | 0.568072  |

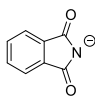

| Center Number | Atomic Number | Atomic Type | Coordinates (in Å) |           |           |
|---------------|---------------|-------------|--------------------|-----------|-----------|
|               |               |             | X                  | Y         | Z         |
| 1             | 6             | 0           | -6.195602          | -1.373689 | 0.128504  |
| 2             | 6             | 0           | -6.733222          | -0.513985 | 1.081706  |
| 3             | 6             | 0           | -7.994120          | -0.724032 | 1.617568  |
| 4             | 6             | 0           | -8.716994          | -1.839551 | 1.164517  |
| 5             | 6             | 0           | -8.176515          | -2.703997 | 0.205721  |
| 6             | 6             | 0           | -6.897293          | -2.478390 | -0.327988 |
| 7             | 6             | 0           | -4.823206          | -0.819717 | -0.204580 |
| 8             | 6             | 0           | -5.682845          | 0.554649  | 1.317649  |
| 9             | 1             | 0           | -8.408270          | -0.050121 | 2.361894  |
| 10            | 1             | 0           | -9.708694          | -2.037247 | 1.560904  |
| 11            | 1             | 0           | -8.756948          | -3.559463 | -0.127421 |
| 12            | 1             | 0           | -6.472461          | -3.145605 | -1.072227 |
| 13            | 8             | 0           | -5.829169          | 1.493024  | 2.112871  |
| 14            | 8             | 0           | -4.056133          | -1.342243 | -1.024896 |
| 15            | 7             | 0           | -4.586896          | 0.314570  | 0.528941  |

### TS<sub>SN2</sub>

| Center | Atomic | Atomic | Coordinates (in Å) |  |  |
|--------|--------|--------|--------------------|--|--|
|--------|--------|--------|--------------------|--|--|

| Number | Number | Type | X         | Y         | Z         |
|--------|--------|------|-----------|-----------|-----------|
| 1      | 6      | 0    | -2.988190 | 0.033115  | -0.817495 |
| 2      | 6      | 0    | -2.860992 | 1.430602  | -0.768946 |
| 3      | 6      | 0    | -3.586875 | 2.202519  | 0.138226  |
| 4      | 6      | 0    | -4.467196 | 1.585083  | 1.029132  |
| 5      | 6      | 0    | -4.613380 | 0.194461  | 0.997104  |
| 6      | 6      | 0    | -3.884718 | -0.567315 | 0.088874  |
| 7      | 1      | 0    | -2.164485 | 1.910736  | -1.448272 |
| 8      | 1      | 0    | -3.465165 | 3.283261  | 0.155063  |
| 9      | 1      | 0    | -5.296308 | -0.278389 | 1.696748  |
| 10     | 1      | 0    | -3.999239 | -1.642951 | 0.073422  |
| 11     | 8      | 0    | -5.209447 | 2.286867  | 1.950838  |
| 12     | 7      | 0    | -2.140403 | -0.689549 | -1.673476 |
| 13     | 6      | 0    | -2.583110 | -1.789162 | -2.312814 |
| 14     | 6      | 0    | -1.525176 | -2.557085 | -3.102030 |
| 15     | 1      | 0    | -1.004373 | -3.261961 | -2.443715 |
| 16     | 1      | 0    | -2.020596 | -3.131013 | -3.888202 |
| 17     | 1      | 0    | -0.767815 | -1.902530 | -3.536090 |
| 18     | 8      | 0    | -3.760451 | -2.213755 | -2.325294 |
| 19     | 16     | 0    | 0.043074  | -0.325820 | -1.277861 |
| 20     | 6      | 0    | 2.839979  | -1.004176 | -0.716590 |
| 21     | 6      | 0    | 2.382556  | 1.236984  | -0.451125 |
| 22     | 7      | 0    | 1.860969  | -0.012734 | -0.779598 |
| 23     | 8      | 0    | 2.677042  | -2.195841 | -0.930730 |
| 24     | 8      | 0    | 1.761776  | 2.288844  | -0.389232 |
| 25     | 6      | 0    | 3.841523  | 1.035567  | -0.173562 |
| 26     | 6      | 0    | 4.827806  | 1.939356  | 0.189365  |
| 27     | 6      | 0    | 6.120960  | 1.436658  | 0.391804  |
| 28     | 6      | 0    | 6.398680  | 0.073643  | 0.232841  |
| 29     | 1      | 0    | 7.409359  | -0.285932 | 0.397133  |
| 30     | 6      | 0    | 5.392282  | -0.831244 | -0.133643 |
| 31     | 1      | 0    | 5.599845  | -1.888828 | -0.257537 |
| 32     | 6      | 0    | 4.118202  | -0.322675 | -0.331677 |
| 33     | 1      | 0    | 6.920674  | 2.112621  | 0.676807  |
| 34     | 1      | 0    | 4.605065  | 2.994008  | 0.311713  |
| 35     | 6      | 0    | -0.366249 | -0.759000 | 0.419858  |
| 36     | 6      | 0    | -0.653501 | -2.083302 | 0.759129  |
| 37     | 6      | 0    | -0.419839 | 0.238403  | 1.398029  |
| 38     | 6      | 0    | -1.000124 | -2.407373 | 2.070992  |
| 39     | 1      | 0    | -0.613649 | -2.851091 | -0.005101 |
| 40     | 6      | 0    | -0.756766 | -0.090971 | 2.711664  |
| 41     | 1      | 0    | -0.195933 | 1.262330  | 1.123242  |
| 42     | 6      | 0    | -1.052485 | -1.412651 | 3.050521  |
| 43     | 1      | 0    | -1.225097 | -3.438042 | 2.328890  |
| 44     | 1      | 0    | -0.799725 | 0.688095  | 3.467098  |

|    |   |   |           |           |          |
|----|---|---|-----------|-----------|----------|
| 45 | 1 | 0 | -1.322926 | -1.666786 | 4.070872 |
| 46 | 1 | 0 | -5.002833 | 3.227486  | 1.863710 |

---

**4a**

---

| Center<br>Number | Atomic<br>Number | Atomic<br>Type | Coordinates (in Å) |           |           |
|------------------|------------------|----------------|--------------------|-----------|-----------|
|                  |                  |                | X                  | Y         | Z         |
| 1                | 6                | 0              | -5.789239          | -2.647427 | -1.894568 |
| 2                | 6                | 0              | -6.013017          | -1.355174 | -2.375149 |
| 3                | 6                | 0              | -5.959273          | -0.274411 | -1.488596 |
| 4                | 6                | 0              | -5.686800          | -0.493564 | -0.144311 |
| 5                | 6                | 0              | -5.462018          | -1.789635 | 0.345569  |
| 6                | 6                | 0              | -5.515291          | -2.870154 | -0.545270 |
| 7                | 1                | 0              | -5.648200          | 0.352591  | 0.536208  |
| 8                | 1                | 0              | -5.342847          | -3.870258 | -0.177125 |
| 9                | 8                | 0              | -6.285903          | -1.085126 | -3.688270 |
| 10               | 7                | 0              | -5.190686          | -1.923762 | 1.725252  |
| 11               | 6                | 0              | -4.959873          | -3.060583 | 2.449584  |
| 12               | 6                | 0              | -4.703983          | -2.830516 | 3.927749  |
| 13               | 1                | 0              | -3.725643          | -3.247142 | 4.181655  |
| 14               | 1                | 0              | -4.730589          | -1.780364 | 4.225357  |
| 15               | 1                | 0              | -5.454259          | -3.380894 | 4.501810  |
| 16               | 8                | 0              | -4.954100          | -4.193881 | 1.968144  |
| 17               | 1                | 0              | -6.132788          | 0.728890  | -1.862233 |
| 18               | 1                | 0              | -6.300185          | -1.914017 | -4.186753 |
| 19               | 1                | 0              | -5.827149          | -3.492293 | -2.577143 |
| 20               | 1                | 0              | -5.169379          | -1.055221 | 2.240100  |

---

**TS2'-S**

---

| Center<br>Number | Atomic<br>Number | Atomic<br>Type | Coordinates (in Å) |           |           |
|------------------|------------------|----------------|--------------------|-----------|-----------|
|                  |                  |                | X                  | Y         | Z         |
| 1                | 6                | 0              | -2.057378          | -1.133370 | 0.425558  |
| 2                | 6                | 0              | -2.626483          | -1.316328 | -0.944156 |
| 3                | 6                | 0              | -3.913489          | -2.002885 | -0.973357 |
| 4                | 6                | 0              | -4.660421          | -2.181688 | 0.151531  |
| 5                | 6                | 0              | -4.208812          | -1.736979 | 1.441470  |
| 6                | 6                | 0              | -2.977440          | -1.178141 | 1.561620  |
| 7                | 1                | 0              | -5.643470          | -2.638339 | 0.073659  |
| 8                | 1                | 0              | -4.858454          | -1.838509 | 2.303568  |
| 9                | 1                | 0              | -2.623403          | -0.821561 | 2.523481  |
| 10               | 8                | 0              | -2.041423          | -0.966529 | -1.977687 |
| 11               | 7                | 0              | 0.636423           | -0.332992 | -0.052945 |
| 12               | 6                | 0              | 1.445393           | -0.888933 | 0.888333  |

|    |    |   |           |           |           |
|----|----|---|-----------|-----------|-----------|
| 13 | 6  | 0 | 2.782580  | -1.341959 | 0.324576  |
| 14 | 1  | 0 | 2.794838  | -2.436348 | 0.293971  |
| 15 | 1  | 0 | 2.959015  | -0.957995 | -0.680742 |
| 16 | 1  | 0 | 3.584954  | -1.021155 | 0.994187  |
| 17 | 8  | 0 | 1.179564  | -1.082691 | 2.090905  |
| 18 | 6  | 0 | -3.066032 | 2.975668  | -1.181890 |
| 19 | 6  | 0 | -2.647960 | 1.921539  | -0.372374 |
| 20 | 6  | 0 | -1.340030 | 1.448835  | -0.498876 |
| 21 | 6  | 0 | -0.441795 | 2.019166  | -1.396191 |
| 22 | 6  | 0 | -0.872938 | 3.078254  | -2.197197 |
| 23 | 6  | 0 | -2.180194 | 3.555483  | -2.094058 |
| 24 | 1  | 0 | -4.083449 | 3.343501  | -1.098674 |
| 25 | 1  | 0 | -3.335236 | 1.466306  | 0.333872  |
| 26 | 1  | 0 | 0.562426  | 1.620588  | -1.465721 |
| 27 | 1  | 0 | -0.183964 | 3.525920  | -2.906327 |
| 28 | 1  | 0 | -2.509452 | 4.377824  | -2.720894 |
| 29 | 1  | 0 | -4.293055 | -2.270423 | -1.954497 |
| 30 | 16 | 0 | -0.801793 | 0.170913  | 0.644117  |
| 31 | 1  | 0 | -1.296304 | -2.249187 | 0.543740  |
| 32 | 6  | 0 | 0.208930  | -3.866399 | -0.393333 |
| 33 | 6  | 0 | 1.118223  | -4.915524 | -0.244328 |
| 34 | 6  | 0 | 1.337627  | -5.458289 | 1.017448  |
| 35 | 6  | 0 | 0.646139  | -4.940705 | 2.107749  |
| 36 | 6  | 0 | -0.251149 | -3.890569 | 1.914181  |
| 37 | 1  | 0 | 1.643526  | -5.290275 | -1.114788 |
| 38 | 1  | 0 | 2.042595  | -6.272423 | 1.150006  |
| 39 | 1  | 0 | 0.797081  | -5.334036 | 3.106025  |
| 40 | 7  | 0 | -0.456182 | -3.385684 | 0.679027  |
| 41 | 6  | 0 | -0.044365 | -3.238080 | -1.730282 |
| 42 | 1  | 0 | 0.644347  | -3.643797 | -2.473165 |
| 43 | 1  | 0 | -1.067220 | -3.429855 | -2.065077 |
| 44 | 1  | 0 | 0.077287  | -2.154411 | -1.666614 |
| 45 | 6  | 0 | -0.993015 | -3.273295 | 3.061443  |
| 46 | 1  | 0 | -2.071446 | -3.286476 | 2.887686  |
| 47 | 1  | 0 | -0.778733 | -3.809538 | 3.987053  |
| 48 | 1  | 0 | -0.671709 | -2.233798 | 3.172766  |

---

**5g'**

---

| Center<br>Number | Atomic<br>Number | Atomic<br>Type | Coordinates (in Å) |           |           |
|------------------|------------------|----------------|--------------------|-----------|-----------|
|                  |                  |                | X                  | Y         | Z         |
| 1                | 6                | 0              | -2.143801          | -0.917426 | 0.286080  |
| 2                | 6                | 0              | -2.180050          | -1.474229 | -1.011729 |
| 3                | 6                | 0              | -3.226122          | -2.357632 | -1.312896 |
| 4                | 6                | 0              | -4.183364          | -2.672737 | -0.353864 |

|    |    |   |           |           |           |
|----|----|---|-----------|-----------|-----------|
| 5  | 6  | 0 | -4.122875 | -2.132590 | 0.935947  |
| 6  | 6  | 0 | -3.092550 | -1.254524 | 1.255805  |
| 7  | 1  | 0 | -4.983131 | -3.359379 | -0.612388 |
| 8  | 1  | 0 | -4.866660 | -2.393982 | 1.679776  |
| 9  | 1  | 0 | -3.020875 | -0.818909 | 2.247209  |
| 10 | 8  | 0 | -1.274290 | -1.185958 | -1.964414 |
| 11 | 7  | 0 | 0.468371  | -0.201821 | -0.197955 |
| 12 | 6  | 0 | 1.271947  | -1.030625 | 0.537236  |
| 13 | 6  | 0 | 2.515073  | -1.469596 | -0.216018 |
| 14 | 1  | 0 | 2.498264  | -2.558057 | -0.325083 |
| 15 | 1  | 0 | 2.588471  | -1.007496 | -1.200757 |
| 16 | 1  | 0 | 3.397174  | -1.211674 | 0.376818  |
| 17 | 8  | 0 | 1.046525  | -1.422268 | 1.690942  |
| 18 | 6  | 0 | -3.141575 | 3.165342  | -1.033392 |
| 19 | 6  | 0 | -2.756971 | 2.017653  | -0.340988 |
| 20 | 6  | 0 | -1.401147 | 1.695110  | -0.274981 |
| 21 | 6  | 0 | -0.426533 | 2.498303  | -0.865830 |
| 22 | 6  | 0 | -0.828424 | 3.643501  | -1.554610 |
| 23 | 6  | 0 | -2.180931 | 3.977289  | -1.639566 |
| 24 | 1  | 0 | -4.194014 | 3.419793  | -1.100673 |
| 25 | 1  | 0 | -3.501878 | 1.380255  | 0.121178  |
| 26 | 1  | 0 | 0.616837  | 2.215523  | -0.805185 |
| 27 | 1  | 0 | -0.080247 | 4.270609  | -2.028036 |
| 28 | 1  | 0 | -2.486849 | 4.867722  | -2.178779 |
| 29 | 1  | 0 | -3.261629 | -2.788055 | -2.307789 |
| 30 | 16 | 0 | -0.881351 | 0.270423  | 0.710951  |
| 31 | 1  | 0 | -0.463060 | -0.792058 | -1.530064 |

**Supplementary Table 17.** Calculated electronic energies of Se-catalyzed reaction in 1,4-dioxane at the B3LYP-D3/BS1 level ( $E_1$ , in a.u.), calculated Gibbs free energies in 1,4-dioxane at the B3LYP-D3/BS1 level ( $G_1$ , in a.u.), calculated electronic energies in 1,4-dioxane at the B3LYP-D3/BS2 level ( $E_2$ , in a.u.), corrected free energies ( $G_{\text{correct}}$ , in a.u.) for all stationary points.

| Species        | $G_1$      | $E_1$      | $E_2$       | $G_{\text{correct}}$ |
|----------------|------------|------------|-------------|----------------------|
| <b>1a</b>      | -515.34993 | -515.47085 | -515.63064  | -515.50972           |
| <b>PhSeBr</b>  | -254.05004 | -254.10553 | -1021.93283 | -1021.87734          |
| <b>INT1-Se</b> | -755.59348 | -755.78502 | -1120.01629 | -1119.82475          |

|                           |             |             |             |             |
|---------------------------|-------------|-------------|-------------|-------------|
| <b>TS1-Se</b>             | -755.57126  | -755.76225  | -1119.99551 | -1119.80452 |
| <b>INT2-Se</b>            | -755.58838  | -755.77911  | -1120.01525 | -1119.82452 |
| <b>TS2-Se</b>             | -755.58007  | -755.77008  | -1120.00758 | -1119.81757 |
| <b>INT3-Se</b>            | -755.61684  | -755.80885  | -1120.04335 | -1119.85134 |
| <b>INT3-Se'</b>           | -769.41950  | -769.62041  | -1537.59565 | -1537.39474 |
| <b>TS-Se-re</b>           | -1284.77452 | -1285.11494 | -2053.24152 | -2052.90109 |
| <b>TS<sub>SeN2</sub>'</b> | -769.38565  | -769.587744 | -1537.56551 | -1537.36341 |
| <b>2a'</b>                | -755.65371  | -755.84414  | -1120.07932 | -1119.88889 |
| <b>2a</b>                 | -515.41384  | -515.53645  | -515.69972  | -515.57711  |
| <b>TS2'-Se</b>            | -1270.93027 | -1271.25712 | -1635.64272 | -1635.31588 |
| <b>INT2'-Se</b>           | -755.61832  | -755.80894  | -1120.04527 | -1119.85464 |
| <b>TS<sub>SeN2</sub></b>  | -769.42780  | -769.62790  | -1537.60681 | -1537.40671 |
| <b>HBr</b>                | -13.79125   | -13.77791   | -417.52884  | -417.542187 |
| <b>TS2'</b>               | -515.29415  | -515.41446  | -515.57482  | -515.45451  |
| <b>INT5</b>               | -515.34226  | -515.46494  | -515.62582  | -515.50314  |
| <b>TS3'</b>               | -515.30116  | -515.42183  | -515.58378  | -515.46311  |

### 1a

| Center<br>Number | Atomic<br>Number | Atomic<br>Type | Coordinates (in Å) |           |           |
|------------------|------------------|----------------|--------------------|-----------|-----------|
|                  |                  |                | X                  | Y         | Z         |
| 1                | 6                | 0              | 1.807854           | -1.239560 | 0.098933  |
| 2                | 6                | 0              | 0.716361           | -0.434634 | -0.231909 |



|    |   |   |           |           |           |
|----|---|---|-----------|-----------|-----------|
| 3  | 6 | 0 | 0.853927  | 0.943134  | -0.376315 |
| 4  | 6 | 0 | 2.113232  | 1.516404  | -0.186490 |
| 5  | 6 | 0 | 3.216228  | 0.730030  | 0.142968  |
| 6  | 6 | 0 | 3.055536  | -0.650698 | 0.284988  |
| 7  | 1 | 0 | 1.662192  | -2.308707 | 0.208110  |
| 8  | 1 | 0 | -0.003695 | 1.551445  | -0.631284 |
| 9  | 1 | 0 | 2.224650  | 2.590823  | -0.296529 |
| 10 | 1 | 0 | 4.189679  | 1.185933  | 0.290342  |
| 11 | 1 | 0 | 3.904889  | -1.275468 | 0.543416  |
| 12 | 8 | 0 | -0.476640 | -1.125269 | -0.400374 |
| 13 | 7 | 0 | -1.563642 | -0.312838 | -0.732766 |
| 14 | 1 | 0 | -1.959274 | -0.612938 | -1.616064 |
| 15 | 6 | 0 | -2.418698 | 0.019857  | 0.308272  |
| 16 | 6 | 0 | -3.755011 | 0.554041  | -0.170256 |
| 17 | 1 | 0 | -3.799363 | 0.709562  | -1.250913 |
| 18 | 1 | 0 | -4.538506 | -0.151729 | 0.120552  |
| 19 | 1 | 0 | -3.953407 | 1.500295  | 0.336871  |
| 20 | 8 | 0 | -2.092209 | -0.054964 | 1.477006  |

---

### PhSeBr

---

| Center Number | Atomic Number | Atomic Type | Coordinates (in Å) |           |           |
|---------------|---------------|-------------|--------------------|-----------|-----------|
|               |               |             | X                  | Y         | Z         |
| 1             | 6             | 0           | 3.255095           | -0.543478 | 1.219361  |
| 2             | 6             | 0           | 2.028324           | 0.117204  | 1.209572  |
| 3             | 6             | 0           | 1.406301           | 0.403446  | -0.014586 |
| 4             | 6             | 0           | 2.010622           | 0.028003  | -1.223409 |
| 5             | 6             | 0           | 3.237394           | -0.632347 | -1.202592 |
| 6             | 6             | 0           | 3.857681           | -0.917586 | 0.016035  |
| 7             | 1             | 0           | 3.739279           | -0.767230 | 2.164403  |
| 8             | 1             | 0           | 1.547831           | 0.406347  | 2.137502  |
| 9             | 1             | 0           | 1.516577           | 0.248781  | -2.162934 |
| 10            | 1             | 0           | 3.707915           | -0.925075 | -2.135612 |
| 11            | 1             | 0           | 4.812841           | -1.433041 | 0.027954  |
| 12            | 34            | 0           | -0.255900          | 1.358022  | -0.037267 |
| 13            | 35            | 0           | -1.785177          | -0.508258 | 0.040097  |

---

### INT1-Se

---

| Center Number | Atomic Number | Atomic Type | Coordinates (in Å) |          |           |
|---------------|---------------|-------------|--------------------|----------|-----------|
|               |               |             | X                  | Y        | Z         |
| 1             | 6             | 0           | -2.132336          | 2.628355 | -1.616772 |
| 2             | 6             | 0           | -1.548101          | 1.830550 | -0.632783 |
| 3             | 6             | 0           | -2.322799          | 1.151970 | 0.304696  |

|    |    |   |           |           |           |
|----|----|---|-----------|-----------|-----------|
| 4  | 6  | 0 | -3.712074 | 1.274416  | 0.241565  |
| 5  | 6  | 0 | -4.316088 | 2.069110  | -0.732140 |
| 6  | 6  | 0 | -3.519479 | 2.747515  | -1.658190 |
| 7  | 1  | 0 | -1.495941 | 3.138322  | -2.331679 |
| 8  | 1  | 0 | -4.319650 | 0.736299  | 0.962218  |
| 9  | 1  | 0 | -5.396720 | 2.156661  | -0.773686 |
| 10 | 1  | 0 | -3.977916 | 3.366459  | -2.423025 |
| 11 | 8  | 0 | -0.154763 | 1.801470  | -0.657799 |
| 12 | 7  | 0 | 0.411429  | 0.774813  | 0.114594  |
| 13 | 6  | 0 | 0.992967  | 1.143093  | 1.321580  |
| 14 | 6  | 0 | 0.813908  | 2.595372  | 1.707536  |
| 15 | 1  | 0 | -0.247835 | 2.846064  | 1.782463  |
| 16 | 1  | 0 | 1.298651  | 2.747538  | 2.670906  |
| 17 | 1  | 0 | 1.252829  | 3.254137  | 0.954473  |
| 18 | 8  | 0 | 1.575447  | 0.321686  | 2.011225  |
| 19 | 6  | 0 | -1.828168 | -2.730943 | 2.152777  |
| 20 | 6  | 0 | -0.752902 | -2.100313 | 1.527503  |
| 21 | 6  | 0 | -0.818521 | -1.833784 | 0.154030  |
| 22 | 6  | 0 | -1.937006 | -2.214626 | -0.594049 |
| 23 | 6  | 0 | -2.996326 | -2.867296 | 0.036825  |
| 24 | 6  | 0 | -2.945885 | -3.117831 | 1.409094  |
| 25 | 1  | 0 | -1.789146 | -2.927961 | 3.219603  |
| 26 | 1  | 0 | 0.120356  | -1.789741 | 2.089783  |
| 27 | 1  | 0 | -1.986759 | -1.980203 | -1.651750 |
| 28 | 1  | 0 | -3.867008 | -3.162441 | -0.540262 |
| 29 | 1  | 0 | -3.777558 | -3.613808 | 1.899831  |
| 30 | 34 | 0 | 0.640346  | -0.900750 | -0.702517 |
| 31 | 1  | 0 | -1.858477 | 0.520364  | 1.049335  |

---

**TS1-Se**

---

| Center<br>Number | Atomic<br>Number | Atomic<br>Type | Coordinates (in Å) |           |           |
|------------------|------------------|----------------|--------------------|-----------|-----------|
|                  |                  |                | X                  | Y         | Z         |
| 1                | 6                | 0              | -2.284813          | -2.074666 | 0.341932  |
| 2                | 6                | 0              | -1.610568          | -1.654275 | -0.832268 |
| 3                | 6                | 0              | -2.332374          | -0.929042 | -1.817499 |
| 4                | 6                | 0              | -3.676661          | -0.668102 | -1.644549 |
| 5                | 6                | 0              | -4.333648          | -1.093189 | -0.474238 |
| 6                | 6                | 0              | -3.644331          | -1.800327 | 0.506718  |
| 7                | 1                | 0              | -1.730267          | -2.650021 | 1.074106  |
| 8                | 1                | 0              | -4.226189          | -0.113736 | -2.398347 |
| 9                | 1                | 0              | -5.387967          | -0.871862 | -0.340862 |
| 10               | 1                | 0              | -4.159698          | -2.132695 | 1.402384  |
| 11               | 8                | 0              | -0.324685          | -1.872597 | -0.969928 |
| 12               | 7                | 0              | 0.572840           | -0.431242 | -0.090485 |

|    |    |   |           |           |           |
|----|----|---|-----------|-----------|-----------|
| 13 | 6  | 0 | 1.806442  | -1.042735 | 0.214085  |
| 14 | 6  | 0 | 2.402805  | -1.836344 | -0.922445 |
| 15 | 1  | 0 | 2.193034  | -1.369546 | -1.885338 |
| 16 | 1  | 0 | 3.475939  | -1.931650 | -0.755427 |
| 17 | 1  | 0 | 1.943747  | -2.828476 | -0.936241 |
| 18 | 8  | 0 | 2.373241  | -0.892288 | 1.287700  |
| 19 | 6  | 0 | -3.604686 | 2.535828  | 0.197582  |
| 20 | 6  | 0 | -2.769696 | 1.638109  | 0.866071  |
| 21 | 6  | 0 | -1.479881 | 1.412820  | 0.380865  |
| 22 | 6  | 0 | -1.014519 | 2.074200  | -0.758909 |
| 23 | 6  | 0 | -1.862096 | 2.954001  | -1.425567 |
| 24 | 6  | 0 | -3.156591 | 3.187477  | -0.949820 |
| 25 | 1  | 0 | -4.610522 | 2.708731  | 0.567206  |
| 26 | 1  | 0 | -3.132209 | 1.099019  | 1.735229  |
| 27 | 1  | 0 | -0.015568 | 1.870224  | -1.126462 |
| 28 | 1  | 0 | -1.510652 | 3.463975  | -2.317248 |
| 29 | 1  | 0 | -3.811220 | 3.876373  | -1.474144 |
| 30 | 34 | 0 | -0.373667 | 0.155005  | 1.329619  |
| 31 | 1  | 0 | -1.790716 | -0.581978 | -2.690436 |

-----  
**INT2-Se**  
 -----

| Center<br>Number | Atomic<br>Number | Atomic<br>Type | Coordinates (in Å) |           |           |
|------------------|------------------|----------------|--------------------|-----------|-----------|
|                  |                  |                | X                  | Y         | Z         |
| 1                | 6                | 0              | -1.583766          | -1.520976 | 0.279049  |
| 2                | 6                | 0              | -1.544522          | -1.426014 | -1.222714 |
| 3                | 6                | 0              | -2.766666          | -0.950196 | -1.871273 |
| 4                | 6                | 0              | -3.915918          | -0.797241 | -1.169448 |
| 5                | 6                | 0              | -3.991521          | -1.078111 | 0.250749  |
| 6                | 6                | 0              | -2.891926          | -1.458102 | 0.940679  |
| 7                | 1                | 0              | -0.869296          | -2.247850 | 0.665964  |
| 8                | 1                | 0              | -4.818779          | -0.468924 | -1.675968 |
| 9                | 1                | 0              | -4.953769          | -1.003956 | 0.746450  |
| 10               | 1                | 0              | -2.945206          | -1.686502 | 2.000932  |
| 11               | 8                | 0              | -0.513975          | -1.689819 | -1.842250 |
| 12               | 7                | 0              | 0.915911           | 0.268566  | -0.155515 |
| 13               | 6                | 0              | 1.701540           | -0.794577 | 0.177268  |
| 14               | 6                | 0              | 2.950408           | -0.931154 | -0.666727 |
| 15               | 1                | 0              | 3.756876           | -1.351298 | -0.062831 |
| 16               | 1                | 0              | 2.730357           | -1.628992 | -1.481310 |
| 17               | 1                | 0              | 3.254353           | 0.021815  | -1.101676 |
| 18               | 8                | 0              | 1.420592           | -1.632228 | 1.058743  |
| 19               | 6                | 0              | -3.543148          | 2.908373  | -0.059523 |
| 20               | 6                | 0              | -2.718291          | 2.011058  | 0.621372  |
| 21               | 6                | 0              | -1.569115          | 1.532001  | -0.010680 |

|    |    |   |           |           |           |
|----|----|---|-----------|-----------|-----------|
| 22 | 6  | 0 | -1.219539 | 1.942202  | -1.299243 |
| 23 | 6  | 0 | -2.046181 | 2.845594  | -1.962510 |
| 24 | 6  | 0 | -3.207975 | 3.322341  | -1.348420 |
| 25 | 1  | 0 | -4.441058 | 3.284142  | 0.420173  |
| 26 | 1  | 0 | -2.974818 | 1.686835  | 1.624595  |
| 27 | 1  | 0 | -0.322469 | 1.541570  | -1.755872 |
| 28 | 1  | 0 | -1.787404 | 3.172634  | -2.964529 |
| 29 | 1  | 0 | -3.849325 | 4.022379  | -1.874575 |
| 30 | 34 | 0 | -0.518911 | 0.215142  | 0.923678  |
| 31 | 1  | 0 | -2.714232 | -0.769067 | -2.939181 |

---

**TS2-Se**

---

| Center<br>Number | Atomic<br>Number | Atomic<br>Type | Coordinates (in Å) |           |           |
|------------------|------------------|----------------|--------------------|-----------|-----------|
|                  |                  |                | X                  | Y         | Z         |
| 1                | 6                | 0              | -1.800040          | -1.183672 | 0.512049  |
| 2                | 6                | 0              | -1.506703          | -1.005471 | -0.922615 |
| 3                | 6                | 0              | -2.667010          | -0.669094 | -1.763500 |
| 4                | 6                | 0              | -3.933950          | -0.689154 | -1.255076 |
| 5                | 6                | 0              | -4.159308          | -0.905181 | 0.134217  |
| 6                | 6                | 0              | -3.088015          | -1.230807 | 0.986534  |
| 7                | 1                | 0              | -0.949450          | -1.369544 | 1.159147  |
| 8                | 1                | 0              | -4.780664          | -0.476262 | -1.898898 |
| 9                | 1                | 0              | -5.174242          | -0.930501 | 0.511903  |
| 10               | 1                | 0              | -3.276293          | -1.403708 | 2.040404  |
| 11               | 8                | 0              | -0.368611          | -1.147850 | -1.383553 |
| 12               | 7                | 0              | -3.778779          | 1.572640  | 0.696999  |
| 13               | 6                | 0              | -4.592384          | 2.022772  | -0.337882 |
| 14               | 6                | 0              | -6.074323          | 1.893990  | -0.038389 |
| 15               | 1                | 0              | -6.516694          | 2.894473  | -0.028683 |
| 16               | 1                | 0              | -6.558163          | 1.333553  | -0.843305 |
| 17               | 1                | 0              | -6.261070          | 1.408628  | 0.919417  |
| 18               | 8                | 0              | -4.191183          | 2.501455  | -1.398560 |
| 19               | 6                | 0              | 0.595483           | 1.315993  | 3.480820  |
| 20               | 6                | 0              | 0.038484           | 1.481041  | 2.213785  |
| 21               | 6                | 0              | -1.353394          | 1.521806  | 2.076316  |
| 22               | 6                | 0              | -2.190065          | 1.405988  | 3.188619  |
| 23               | 6                | 0              | -1.619343          | 1.242279  | 4.450235  |
| 24               | 6                | 0              | -0.231346          | 1.195100  | 4.599649  |
| 25               | 1                | 0              | 1.674418           | 1.279414  | 3.591765  |
| 26               | 1                | 0              | 0.681845           | 1.562153  | 1.342026  |
| 27               | 1                | 0              | -3.264140          | 1.439970  | 3.051055  |
| 28               | 1                | 0              | -2.262646          | 1.152455  | 5.320168  |
| 29               | 1                | 0              | 0.204886           | 1.066190  | 5.584961  |
| 30               | 34               | 0              | -2.047384          | 1.729514  | 0.294240  |

31 1 0 -2.475426 -0.484021 -2.814883

---

**INT3-Se**

---

| Center Number | Atomic Number | Atomic Type | Coordinates (in Å) |           |           |
|---------------|---------------|-------------|--------------------|-----------|-----------|
|               |               |             | X                  | Y         | Z         |
| 1             | 6             | 0           | -2.178892          | -1.979941 | 0.286442  |
| 2             | 6             | 0           | -1.789101          | -2.555087 | -1.018198 |
| 3             | 6             | 0           | -2.310217          | -1.873925 | -2.223010 |
| 4             | 6             | 0           | -3.112530          | -0.805199 | -2.138421 |
| 5             | 6             | 0           | -3.593424          | -0.248484 | -0.827747 |
| 6             | 6             | 0           | -2.986594          | -0.915952 | 0.376213  |
| 7             | 1             | 0           | -1.757376          | -2.454929 | 1.166667  |
| 8             | 1             | 0           | -3.475644          | -0.298280 | -3.028760 |
| 9             | 1             | 0           | -4.673735          | -0.439426 | -0.788873 |
| 10            | 1             | 0           | -3.244265          | -0.483492 | 1.338831  |
| 11            | 8             | 0           | -1.056981          | -3.539239 | -1.097940 |
| 12            | 7             | 0           | -3.418884          | 1.214136  | -0.772060 |
| 13            | 6             | 0           | -4.431959          | 2.111931  | -0.465275 |
| 14            | 6             | 0           | -5.850859          | 1.564113  | -0.391963 |
| 15            | 1             | 0           | -6.513510          | 2.412515  | -0.228321 |
| 16            | 1             | 0           | -6.142844          | 1.052893  | -1.313784 |
| 17            | 1             | 0           | -5.966885          | 0.861776  | 0.439609  |
| 18            | 8             | 0           | -4.209275          | 3.297299  | -0.267104 |
| 19            | 6             | 0           | 0.081764           | 0.912145  | 2.817073  |
| 20            | 6             | 0           | -0.264314          | 0.908175  | 1.465399  |
| 21            | 6             | 0           | -1.187348          | 1.843798  | 0.983464  |
| 22            | 6             | 0           | -1.764877          | 2.781957  | 1.849303  |
| 23            | 6             | 0           | -1.429363          | 2.762459  | 3.202764  |
| 24            | 6             | 0           | -0.504741          | 1.833445  | 3.686172  |
| 25            | 1             | 0           | 0.798999           | 0.188208  | 3.191170  |
| 26            | 1             | 0           | 0.163456           | 0.174672  | 0.791062  |
| 27            | 1             | 0           | -2.476676          | 3.498756  | 1.457704  |
| 28            | 1             | 0           | -1.882514          | 3.481335  | 3.878471  |
| 29            | 1             | 0           | -0.241228          | 1.828477  | 4.739333  |
| 30            | 34            | 0           | -1.640791          | 1.851209  | -0.894891 |
| 31            | 1             | 0           | -1.990281          | -2.277240 | -3.178478 |

---

**2a'**

---

| Center Number | Atomic Number | Atomic Type | Coordinates (in Å) |           |           |
|---------------|---------------|-------------|--------------------|-----------|-----------|
|               |               |             | X                  | Y         | Z         |
| 1             | 6             | 0           | -1.624542          | -1.669554 | 0.338302  |
| 2             | 6             | 0           | -1.958366          | -1.796627 | -1.014407 |

|    |    |   |           |           |           |
|----|----|---|-----------|-----------|-----------|
| 3  | 6  | 0 | -3.301611 | -1.901919 | -1.397755 |
| 4  | 6  | 0 | -4.298476 | -1.884078 | -0.430187 |
| 5  | 6  | 0 | -3.971928 | -1.763525 | 0.924648  |
| 6  | 6  | 0 | -2.630430 | -1.647087 | 1.301262  |
| 7  | 1  | 0 | -5.342403 | -1.962623 | -0.715359 |
| 8  | 1  | 0 | -2.380868 | -1.534115 | 2.350523  |
| 9  | 8  | 0 | -1.021765 | -1.823871 | -2.005295 |
| 10 | 7  | 0 | -5.002597 | -1.724776 | 1.914952  |
| 11 | 6  | 0 | -5.240369 | -2.781770 | 2.788195  |
| 12 | 6  | 0 | -4.602871 | -4.104536 | 2.395981  |
| 13 | 1  | 0 | -5.062075 | -4.888403 | 2.997474  |
| 14 | 1  | 0 | -4.728279 | -4.317614 | 1.332341  |
| 15 | 1  | 0 | -3.528208 | -4.080272 | 2.598395  |
| 16 | 8  | 0 | -5.924130 | -2.667430 | 3.794042  |
| 17 | 6  | 0 | -2.214138 | 1.926142  | 3.625069  |
| 18 | 6  | 0 | -3.322117 | 1.530741  | 2.873205  |
| 19 | 6  | 0 | -4.211522 | 0.584618  | 3.394278  |
| 20 | 6  | 0 | -3.989757 | 0.024900  | 4.660324  |
| 21 | 6  | 0 | -2.868955 | 0.409922  | 5.394370  |
| 22 | 6  | 0 | -1.984827 | 1.363032  | 4.880751  |
| 23 | 1  | 0 | -1.524866 | 2.662161  | 3.222786  |
| 24 | 1  | 0 | -3.490315 | 1.940168  | 1.883014  |
| 25 | 1  | 0 | -4.682991 | -0.715800 | 5.042306  |
| 26 | 1  | 0 | -2.690130 | -0.026843 | 6.372118  |
| 27 | 1  | 0 | -1.117593 | 1.665052  | 5.459897  |
| 28 | 1  | 0 | -3.541260 | -1.997964 | -2.450838 |
| 29 | 1  | 0 | -0.140766 | -1.739325 | -1.616205 |
| 30 | 1  | 0 | -0.583109 | -1.582479 | 0.636916  |
| 31 | 34 | 0 | -5.710391 | -0.015213 | 2.336866  |

-----  
**2a**  
-----

| Center<br>Number | Atomic<br>Number | Atomic<br>Type | Coordinates (in Å) |           |           |
|------------------|------------------|----------------|--------------------|-----------|-----------|
|                  |                  |                | X                  | Y         | Z         |
| 1                | 6                | 0              | -2.028534          | -1.270261 | 0.193802  |
| 2                | 6                | 0              | -2.898960          | -0.304998 | -0.320714 |
| 3                | 6                | 0              | -2.429190          | 0.989361  | -0.570333 |
| 4                | 6                | 0              | -1.108283          | 1.313374  | -0.286157 |
| 5                | 6                | 0              | -0.228065          | 0.352396  | 0.229090  |
| 6                | 6                | 0              | -0.697454          | -0.946092 | 0.447912  |
| 7                | 1                | 0              | -2.382868          | -2.281519 | 0.376231  |
| 8                | 1                | 0              | -0.749343          | 2.323281  | -0.458734 |
| 9                | 1                | 0              | -0.018017          | -1.710171 | 0.807539  |
| 10               | 8                | 0              | -4.209228          | -0.563757 | -0.603709 |
| 11               | 7                | 0              | 1.123842           | 0.705619  | 0.475726  |

|    |   |   |           |           |           |
|----|---|---|-----------|-----------|-----------|
| 12 | 6 | 0 | 1.870957  | 0.553468  | 1.621134  |
| 13 | 6 | 0 | 1.203239  | -0.087981 | 2.821521  |
| 14 | 1 | 0 | 1.721091  | 0.265704  | 3.713183  |
| 15 | 1 | 0 | 0.138107  | 0.141867  | 2.885678  |
| 16 | 1 | 0 | 1.312176  | -1.176163 | 2.776738  |
| 17 | 8 | 0 | 3.036673  | 0.934195  | 1.650693  |
| 18 | 1 | 0 | -3.112733 | 1.728868  | -0.972413 |
| 19 | 1 | 0 | 1.610774  | 1.226375  | -0.243390 |
| 20 | 1 | 0 | -4.404999 | -1.486955 | -0.394600 |

---

**TS2'-Se**

---

| Center<br>Number | Atomic<br>Number | Atomic<br>Type | Coordinates (in Å) |           |           |
|------------------|------------------|----------------|--------------------|-----------|-----------|
|                  |                  |                | X                  | Y         | Z         |
| 1                | 6                | 0              | -1.305058          | 1.820169  | -0.468870 |
| 2                | 6                | 0              | -1.738763          | 2.265468  | 0.866774  |
| 3                | 6                | 0              | -2.885420          | 3.136166  | 0.920519  |
| 4                | 6                | 0              | -3.550744          | 3.505053  | -0.216177 |
| 5                | 6                | 0              | -3.147503          | 3.057295  | -1.512731 |
| 6                | 6                | 0              | -2.090703          | 2.203449  | -1.626454 |
| 7                | 1                | 0              | -4.418423          | 4.154550  | -0.136373 |
| 8                | 1                | 0              | -3.689451          | 3.390525  | -2.390969 |
| 9                | 1                | 0              | -1.788158          | 1.828137  | -2.601152 |
| 10               | 8                | 0              | -1.099158          | 1.944022  | 1.907594  |
| 11               | 7                | 0              | 0.389957           | -0.672142 | 0.581065  |
| 12               | 6                | 0              | 1.617351           | -0.474100 | 0.050723  |
| 13               | 6                | 0              | 2.744457           | -1.103573 | 0.852409  |
| 14               | 1                | 0              | 2.373163           | -1.680800 | 1.699345  |
| 15               | 1                | 0              | 3.327578           | -1.749743 | 0.190034  |
| 16               | 1                | 0              | 3.402427           | -0.312272 | 1.219329  |
| 17               | 8                | 0              | 1.868769           | 0.176676  | -0.988982 |
| 18               | 6                | 0              | -4.754376          | -1.205686 | 0.358570  |
| 19               | 6                | 0              | -3.601338          | -0.832804 | -0.331503 |
| 20               | 6                | 0              | -2.396608          | -0.724304 | 0.366322  |
| 21               | 6                | 0              | -2.319328          | -0.980176 | 1.735224  |
| 22               | 6                | 0              | -3.480271          | -1.354483 | 2.411764  |
| 23               | 6                | 0              | -4.692935          | -1.466087 | 1.728784  |
| 24               | 1                | 0              | -5.695573          | -1.295389 | -0.174296 |
| 25               | 1                | 0              | -3.644337          | -0.623725 | -1.396217 |
| 26               | 1                | 0              | -1.368558          | -0.878690 | 2.241396  |
| 27               | 1                | 0              | -3.436110          | -1.554537 | 3.477715  |
| 28               | 1                | 0              | -5.591087          | -1.757827 | 2.264157  |
| 29               | 34               | 0              | -0.852052          | -0.118726 | -0.625590 |
| 30               | 1                | 0              | -3.208801          | 3.463764  | 1.903022  |
| 31               | 1                | 0              | 0.456487           | 1.938333  | 1.599269  |

|    |   |   |           |          |           |
|----|---|---|-----------|----------|-----------|
| 32 | 6 | 0 | 3.568657  | 2.250192 | 4.256996  |
| 33 | 6 | 0 | 2.416717  | 2.436696 | 3.494052  |
| 34 | 6 | 0 | 1.331215  | 3.167065 | 3.970850  |
| 35 | 6 | 0 | 1.420606  | 3.728846 | 5.246709  |
| 36 | 6 | 0 | 2.563663  | 3.559801 | 6.027240  |
| 37 | 6 | 0 | 3.634976  | 2.814670 | 5.528532  |
| 38 | 1 | 0 | 4.389639  | 1.671744 | 3.847490  |
| 39 | 1 | 0 | 0.579558  | 4.298225 | 5.629727  |
| 40 | 1 | 0 | 2.619625  | 4.001456 | 7.016631  |
| 41 | 1 | 0 | 4.529824  | 2.675636 | 6.126860  |
| 42 | 8 | 0 | 2.437494  | 1.803771 | 2.249907  |
| 43 | 7 | 0 | 1.448686  | 2.245871 | 1.378222  |
| 44 | 6 | 0 | 1.840436  | 2.776354 | 0.228375  |
| 45 | 6 | 0 | 3.290832  | 3.025773 | -0.030798 |
| 46 | 1 | 0 | 3.830122  | 3.307569 | 0.872748  |
| 47 | 1 | 0 | 3.704566  | 2.088596 | -0.417257 |
| 48 | 1 | 0 | 3.381918  | 3.793431 | -0.798523 |
| 49 | 8 | 0 | 0.989346  | 3.067457 | -0.671376 |
| 50 | 1 | 0 | 0.430308  | 3.275756 | 3.379767  |
| 51 | 1 | 0 | -0.089152 | 2.471294 | -0.590498 |

### INT2'-Se

| Center<br>Number | Atomic<br>Number | Atomic<br>Type | Coordinates (in Å) |           |           |
|------------------|------------------|----------------|--------------------|-----------|-----------|
|                  |                  |                | X                  | Y         | Z         |
| 1                | 6                | 0              | -2.054796          | 1.276722  | -0.263114 |
| 2                | 6                | 0              | -2.492760          | 1.460510  | 1.066587  |
| 3                | 6                | 0              | -3.306864          | 2.571239  | 1.335897  |
| 4                | 6                | 0              | -3.649120          | 3.461359  | 0.324584  |
| 5                | 6                | 0              | -3.186599          | 3.283027  | -0.983975 |
| 6                | 6                | 0              | -2.381307          | 2.185947  | -1.273285 |
| 7                | 1                | 0              | -4.277333          | 4.314338  | 0.561890  |
| 8                | 1                | 0              | -3.446938          | 3.989717  | -1.763946 |
| 9                | 1                | 0              | -2.007677          | 2.027675  | -2.280625 |
| 10               | 8                | 0              | -2.192966          | 0.625196  | 2.076006  |
| 11               | 7                | 0              | -0.110744          | -0.596792 | 0.855747  |
| 12               | 6                | 0              | 1.030080           | 0.146286  | 0.803047  |
| 13               | 6                | 0              | 1.919678           | 0.000263  | 2.024672  |
| 14               | 1                | 0              | 2.912876           | -0.321779 | 1.699654  |
| 15               | 1                | 0              | 2.029795           | 0.979021  | 2.500296  |
| 16               | 1                | 0              | 1.520131           | -0.713797 | 2.745232  |
| 17               | 8                | 0              | 1.344794           | 0.899579  | -0.135242 |
| 18               | 6                | 0              | -4.649101          | -2.369281 | -0.774563 |
| 19               | 6                | 0              | -3.670803          | -1.389923 | -0.941721 |
| 20               | 6                | 0              | -2.403295          | -1.598748 | -0.396009 |



|    |    |   |           |           |           |
|----|----|---|-----------|-----------|-----------|
| 21 | 6  | 0 | -2.091930 | -2.767064 | 0.298416  |
| 22 | 6  | 0 | -3.081314 | -3.738779 | 0.457790  |
| 23 | 6  | 0 | -4.355042 | -3.542431 | -0.076836 |
| 24 | 1  | 0 | -5.641319 | -2.211292 | -1.184723 |
| 25 | 1  | 0 | -3.902282 | -0.468559 | -1.466224 |
| 26 | 1  | 0 | -1.105428 | -2.893260 | 0.727865  |
| 27 | 1  | 0 | -2.854429 | -4.646926 | 1.007087  |
| 28 | 1  | 0 | -5.120334 | -4.300892 | 0.053184  |
| 29 | 34 | 0 | -1.015395 | -0.274823 | -0.721321 |
| 30 | 1  | 0 | -3.648544 | 2.714496  | 2.355259  |
| 31 | 1  | 0 | -1.414710 | 0.051521  | 1.824242  |

---

**TS-Se-re**

---

| Center<br>Number | Atomic<br>Number | Atomic<br>Type | Coordinates (in Å) |           |           |
|------------------|------------------|----------------|--------------------|-----------|-----------|
|                  |                  |                | X                  | Y         | Z         |
| 1                | 6                | 0              | -3.111695          | 0.415920  | 0.801455  |
| 2                | 6                | 0              | -2.378166          | -0.801854 | 0.709087  |
| 3                | 6                | 0              | -2.186210          | -1.425262 | -0.557404 |
| 4                | 6                | 0              | -2.695832          | -0.851938 | -1.686918 |
| 5                | 6                | 0              | -3.562971          | 0.302151  | -1.612324 |
| 6                | 6                | 0              | -3.627182          | 0.976427  | -0.331038 |
| 7                | 1                | 0              | -3.197708          | 0.897072  | 1.769163  |
| 8                | 1                | 0              | -2.533739          | -1.301706 | -2.660467 |
| 9                | 1                | 0              | -4.651748          | -0.438539 | -1.546086 |
| 10               | 1                | 0              | -4.160872          | 1.917429  | -0.275866 |
| 11               | 8                | 0              | -1.845992          | -1.383204 | 1.752700  |
| 12               | 7                | 0              | -3.623957          | 1.136120  | -2.801156 |
| 13               | 6                | 0              | -4.784949          | 1.811535  | -3.093101 |
| 14               | 6                | 0              | -4.789061          | 2.758180  | -4.269958 |
| 15               | 1                | 0              | -5.823145          | 3.038398  | -4.466393 |
| 16               | 1                | 0              | -4.206346          | 3.655208  | -4.043247 |
| 17               | 1                | 0              | -4.351658          | 2.302279  | -5.161087 |
| 18               | 8                | 0              | -5.814148          | 1.631959  | -2.433136 |
| 19               | 6                | 0              | 0.032899           | 1.917293  | 0.244243  |
| 20               | 6                | 0              | -0.341743          | 1.566162  | -1.051854 |
| 21               | 6                | 0              | -1.272869          | 2.352885  | -1.739994 |
| 22               | 6                | 0              | -1.807899          | 3.503986  | -1.144317 |
| 23               | 6                | 0              | -1.435549          | 3.840959  | 0.155407  |
| 24               | 6                | 0              | -0.524004          | 3.043655  | 0.852233  |
| 25               | 1                | 0              | 0.737589           | 1.298305  | 0.789249  |
| 26               | 1                | 0              | 0.051770           | 0.668312  | -1.513921 |
| 27               | 1                | 0              | -2.521602          | 4.114378  | -1.687092 |
| 28               | 1                | 0              | -1.860524          | 4.720611  | 0.627557  |
| 29               | 1                | 0              | -0.252134          | 3.296176  | 1.871445  |
| 30               | 34               | 0              | -1.915353          | 1.748192  | -3.451681 |

|    |    |   |           |           |           |
|----|----|---|-----------|-----------|-----------|
| 31 | 1  | 0 | -1.602160 | -2.337122 | -0.595637 |
| 32 | 1  | 0 | -2.016662 | -0.864286 | 2.614651  |
| 33 | 35 | 0 | -2.413858 | 0.277409  | 4.319254  |
| 34 | 1  | 0 | -6.511598 | 0.896154  | -1.003218 |
| 35 | 6  | 0 | -8.724007 | 1.470417  | 2.406248  |
| 36 | 6  | 0 | -7.655871 | 0.894084  | 1.722689  |
| 37 | 6  | 0 | -6.414650 | 0.711194  | 2.322520  |
| 38 | 6  | 0 | -6.240267 | 1.121828  | 3.647142  |
| 39 | 6  | 0 | -7.296094 | 1.700263  | 4.350714  |
| 40 | 6  | 0 | -8.535126 | 1.871234  | 3.727536  |
| 41 | 1  | 0 | -9.675605 | 1.597147  | 1.901755  |
| 42 | 1  | 0 | -5.269940 | 0.976970  | 4.113406  |
| 43 | 1  | 0 | -7.154585 | 2.015694  | 5.378972  |
| 44 | 1  | 0 | -9.361214 | 2.322161  | 4.268392  |
| 45 | 8  | 0 | -7.956769 | 0.486830  | 0.410983  |
| 46 | 7  | 0 | -6.842084 | 0.172580  | -0.348853 |
| 47 | 6  | 0 | -6.523643 | -1.107783 | -0.549844 |
| 48 | 6  | 0 | -7.264930 | -2.170998 | 0.199969  |
| 49 | 1  | 0 | -7.077516 | -2.062137 | 1.272638  |
| 50 | 1  | 0 | -8.341047 | -2.069169 | 0.043277  |
| 51 | 1  | 0 | -6.916213 | -3.145858 | -0.135938 |
| 52 | 8  | 0 | -5.581566 | -1.396031 | -1.339076 |
| 53 | 1  | 0 | -5.591967 | 0.266750  | 1.779441  |

---

**INT3-Se'**

---

| Center<br>Number | Atomic<br>Number | Atomic<br>Type | Coordinates (in Å) |           |           |
|------------------|------------------|----------------|--------------------|-----------|-----------|
|                  |                  |                | X                  | Y         | Z         |
| 1                | 6                | 0              | -1.382932          | -0.730381 | -1.864625 |
| 2                | 6                | 0              | -0.558661          | -0.112319 | -2.870074 |
| 3                | 6                | 0              | -1.022598          | 1.050292  | -3.593703 |
| 4                | 6                | 0              | -2.208968          | 1.611438  | -3.289104 |
| 5                | 6                | 0              | -3.132446          | 1.008921  | -2.290847 |
| 6                | 6                | 0              | -2.574216          | -0.174481 | -1.563023 |
| 7                | 1                | 0              | -0.991667          | -1.595735 | -1.342937 |
| 8                | 1                | 0              | -2.549594          | 2.509708  | -3.793078 |
| 9                | 1                | 0              | -4.002270          | 0.608392  | -2.847477 |
| 10               | 1                | 0              | -3.210468          | -0.604120 | -0.797781 |
| 11               | 8                | 0              | 0.613558           | -0.543259 | -3.163781 |
| 12               | 7                | 0              | -3.705853          | 2.016189  | -1.383875 |
| 13               | 6                | 0              | -4.996900          | 1.771198  | -0.931739 |
| 14               | 6                | 0              | -5.589307          | 2.731849  | 0.073575  |
| 15               | 1                | 0              | -6.616375          | 2.422189  | 0.261579  |
| 16               | 1                | 0              | -5.022687          | 2.719272  | 1.008166  |
| 17               | 1                | 0              | -5.577198          | 3.759631  | -0.298270 |

|    |    |   |           |           |           |
|----|----|---|-----------|-----------|-----------|
| 18 | 8  | 0 | -5.619168 | 0.810399  | -1.371990 |
| 19 | 6  | 0 | 0.844885  | 0.960097  | 0.072139  |
| 20 | 6  | 0 | -0.008952 | 1.966042  | -0.377595 |
| 21 | 6  | 0 | -1.299547 | 2.063489  | 0.153156  |
| 22 | 6  | 0 | -1.724102 | 1.184649  | 1.157623  |
| 23 | 6  | 0 | -0.865976 | 0.175421  | 1.593819  |
| 24 | 6  | 0 | 0.410877  | 0.053827  | 1.043063  |
| 25 | 1  | 0 | 1.834291  | 0.854457  | -0.359132 |
| 26 | 1  | 0 | 0.304191  | 2.639337  | -1.168247 |
| 27 | 1  | 0 | -2.722662 | 1.273786  | 1.572646  |
| 28 | 1  | 0 | -1.198438 | -0.521982 | 2.355826  |
| 29 | 1  | 0 | 1.064737  | -0.753850 | 1.350222  |
| 30 | 34 | 0 | -2.537663 | 3.311406  | -0.640591 |
| 31 | 1  | 0 | -0.359357 | 1.465858  | -4.343348 |
| 32 | 1  | 0 | 0.950526  | -1.337741 | -2.547288 |
| 33 | 35 | 0 | 1.602857  | -2.714058 | -1.325825 |

---

**TS<sub>SeN2</sub>'**

---

| Center<br>Number | Atomic<br>Number | Atomic<br>Type | Coordinates (in Å) |           |           |
|------------------|------------------|----------------|--------------------|-----------|-----------|
|                  |                  |                | X                  | Y         | Z         |
| 1                | 6                | 0              | -1.573667          | -0.963310 | 1.445381  |
| 2                | 6                | 0              | -1.636218          | -0.172043 | 0.197405  |
| 3                | 6                | 0              | -2.896502          | -0.252113 | -0.576133 |
| 4                | 6                | 0              | -3.932132          | -0.998373 | -0.174814 |
| 5                | 6                | 0              | -3.861836          | -1.877121 | 1.040598  |
| 6                | 6                | 0              | -2.598535          | -1.720632 | 1.849144  |
| 7                | 1                | 0              | -4.858304          | -1.034195 | -0.740535 |
| 8                | 1                | 0              | -2.553565          | -2.265799 | 2.787679  |
| 9                | 8                | 0              | -0.700987          | 0.531576  | -0.169605 |
| 10               | 7                | 0              | -5.051074          | -1.652562 | 1.903976  |
| 11               | 6                | 0              | -5.575361          | -2.611413 | 2.636569  |
| 12               | 6                | 0              | -5.163570          | -4.048698 | 2.527425  |
| 13               | 1                | 0              | -5.747059          | -4.634455 | 3.235189  |
| 14               | 1                | 0              | -5.345024          | -4.419508 | 1.514631  |
| 15               | 1                | 0              | -4.100612          | -4.169838 | 2.748903  |
| 16               | 8                | 0              | -6.511343          | -2.394334 | 3.520315  |
| 17               | 6                | 0              | -2.211852          | 2.169185  | 2.794629  |
| 18               | 6                | 0              | -3.423467          | 1.727937  | 2.265618  |
| 19               | 6                | 0              | -4.226737          | 0.865971  | 3.018147  |
| 20               | 6                | 0              | -3.854589          | 0.475057  | 4.309584  |
| 21               | 6                | 0              | -2.636911          | 0.913223  | 4.824749  |
| 22               | 6                | 0              | -1.814277          | 1.750325  | 4.065721  |
| 23               | 1                | 0              | -1.574056          | 2.821712  | 2.208234  |
| 24               | 1                | 0              | -3.728895          | 2.021313  | 1.268080  |

|    |    |   |           |           |           |
|----|----|---|-----------|-----------|-----------|
| 25 | 1  | 0 | -4.518431 | -0.145317 | 4.900520  |
| 26 | 1  | 0 | -2.335867 | 0.612462  | 5.822883  |
| 27 | 1  | 0 | -0.865926 | 2.087135  | 4.472056  |
| 28 | 1  | 0 | -2.944833 | 0.349906  | -1.477497 |
| 29 | 1  | 0 | -0.666959 | -0.867434 | 2.032362  |
| 30 | 34 | 0 | -5.817608 | 0.159728  | 2.216905  |
| 31 | 1  | 0 | -6.733852 | -1.425854 | 3.626731  |
| 32 | 35 | 0 | -7.753853 | 1.006377  | 4.680678  |
| 33 | 1  | 0 | -3.914579 | -2.916233 | 0.685267  |

-----  
**TS<sub>SeN2</sub>**  
 -----

| Center<br>Number | Atomic<br>Number | Atomic<br>Type | Coordinates (in Å) |           |           |
|------------------|------------------|----------------|--------------------|-----------|-----------|
|                  |                  |                | X                  | Y         | Z         |
| 6                | 0                | -1.531344      | -1.918286          | 0.572556  |           |
| 2                | 6                | 0              | -1.738928          | -1.800665 | -0.806565 |
| 3                | 6                | 0              | -3.036005          | -1.616487 | -1.309475 |
| 4                | 6                | 0              | -4.113476          | -1.553642 | -0.438351 |
| 5                | 6                | 0              | -3.904579          | -1.686291 | 0.938205  |
| 6                | 6                | 0              | -2.613711          | -1.851045 | 1.444504  |
| 7                | 1                | 0              | -5.118626          | -1.401139 | -0.816161 |
| 8                | 1                | 0              | -2.457921          | -1.911382 | 2.515770  |
| 9                | 8                | 0              | -0.726986          | -1.851009 | -1.710142 |
| 10               | 7                | 0              | -5.006341          | -1.559476 | 1.838501  |
| 11               | 6                | 0              | -5.462823          | -2.560677 | 2.559440  |
| 12               | 6                | 0              | -4.997457          | -3.968974 | 2.383740  |
| 13               | 1                | 0              | -5.835738          | -4.640326 | 2.574451  |
| 14               | 1                | 0              | -4.587805          | -4.130419 | 1.388526  |
| 15               | 1                | 0              | -4.218588          | -4.180823 | 3.123239  |
| 16               | 8                | 0              | -6.362160          | -2.401100 | 3.492383  |
| 17               | 6                | 0              | -1.928599          | 1.618226  | 3.104774  |
| 18               | 6                | 0              | -3.110013          | 1.274677  | 2.447973  |
| 19               | 6                | 0              | -4.197351          | 0.803556  | 3.194585  |
| 20               | 6                | 0              | -4.125093          | 0.699505  | 4.588863  |
| 21               | 6                | 0              | -2.941596          | 1.055178  | 5.233090  |
| 22               | 6                | 0              | -1.844825          | 1.506338  | 4.493583  |
| 23               | 1                | 0              | -1.080389          | 1.979989  | 2.532553  |
| 24               | 1                | 0              | -3.187482          | 1.361634  | 1.370054  |
| 25               | 1                | 0              | -4.999065          | 0.384241  | 5.148819  |
| 26               | 1                | 0              | -2.879308          | 0.986906  | 6.314337  |
| 27               | 1                | 0              | -0.927095          | 1.783024  | 5.003227  |
| 28               | 1                | 0              | -3.175494          | -1.522836 | -2.380164 |
| 29               | 1                | 0              | 0.116980           | -1.965583 | -1.251710 |
| 30               | 1                | 0              | -0.526815          | -2.049489 | 0.963989  |
| 31               | 34               | 0              | -5.782156          | 0.232079  | 2.269414  |

-----1

|    |    |   |           |           |          |
|----|----|---|-----------|-----------|----------|
| 32 | 1  | 0 | -6.611747 | -1.443385 | 3.616163 |
| 33 | 35 | 0 | -7.808789 | 1.011589  | 4.748902 |

---

**HBr**

---

| Center<br>Number | Atomic<br>Number | Atomic<br>Type | Coordinates (in Å) |           |          |
|------------------|------------------|----------------|--------------------|-----------|----------|
|                  |                  |                | X                  | Y         | Z        |
| 1                | 35               | 0              | -2.222641          | -0.015501 | 0.010800 |
| 2                | 1                | 0              | -0.832726          | -0.301143 | 0.233843 |

---

**TS2'**

---

| Center<br>Number | Atomic<br>Number | Atomic<br>Type | Coordinates (in Å) |           |           |
|------------------|------------------|----------------|--------------------|-----------|-----------|
|                  |                  |                | X                  | Y         | Z         |
| 1                | 6                | 0              | 1.560354           | 1.323923  | -0.101337 |
| 2                | 6                | 0              | 0.475042           | 0.692916  | 0.615750  |
| 3                | 6                | 0              | 0.507847           | -0.750414 | 0.768551  |
| 4                | 6                | 0              | 1.639197           | -1.481114 | 0.357958  |
| 5                | 6                | 0              | 2.669480           | -0.826834 | -0.280011 |
| 6                | 6                | 0              | 2.628626           | 0.582357  | -0.514964 |
| 7                | 1                | 0              | 1.492089           | 2.392527  | -0.270398 |
| 8                | 1                | 0              | -0.246516          | -1.202999 | 1.398837  |
| 9                | 1                | 0              | 1.683100           | -2.551047 | 0.527603  |
| 10               | 1                | 0              | 3.539709           | -1.385925 | -0.610014 |
| 11               | 1                | 0              | 3.458631           | 1.052584  | -1.032397 |
| 12               | 8                | 0              | -0.527398          | 1.344740  | 1.019297  |
| 13               | 7                | 0              | -1.905236          | 1.143046  | -0.689453 |
| 14               | 6                | 0              | -1.908441          | -0.180551 | -0.532101 |
| 15               | 6                | 0              | -3.004914          | -0.911787 | 0.219182  |
| 16               | 1                | 0              | -2.776473          | -0.886174 | 1.291834  |
| 17               | 1                | 0              | -3.982866          | -0.444307 | 0.076483  |
| 18               | 1                | 0              | -3.049959          | -1.955074 | -0.098243 |
| 19               | 8                | 0              | -0.886047          | -0.837716 | -0.917620 |
| 20               | 1                | 0              | -2.736581          | 1.540707  | -0.240469 |

---

**INT5**

---

| Center<br>Number | Atomic<br>Number | Atomic<br>Type | Coordinates (in Å) |           |           |
|------------------|------------------|----------------|--------------------|-----------|-----------|
|                  |                  |                | X                  | Y         | Z         |
| 1                | 6                | 0              | 2.128557           | 1.207109  | -0.051631 |
| 2                | 6                | 0              | 0.681676           | 0.986780  | -0.081226 |
| 3                | 6                | 0              | 0.200198           | -0.435529 | 0.271449  |
| 4                | 6                | 0              | 1.222546           | -1.516962 | 0.101066  |

|    |   |   |           |           |           |
|----|---|---|-----------|-----------|-----------|
| 5  | 6 | 0 | 2.530895  | -1.224856 | 0.026021  |
| 6  | 6 | 0 | 2.984759  | 0.158644  | -0.016564 |
| 7  | 1 | 0 | 2.472433  | 2.229253  | -0.168681 |
| 8  | 1 | 0 | 0.005710  | -0.379846 | 1.358583  |
| 9  | 1 | 0 | 0.851621  | -2.536765 | 0.101979  |
| 10 | 1 | 0 | 3.272298  | -2.014655 | -0.031635 |
| 11 | 1 | 0 | 4.055043  | 0.339996  | -0.064940 |
| 12 | 8 | 0 | -0.129057 | 1.872649  | -0.318139 |
| 13 | 7 | 0 | -3.089596 | -0.430112 | -1.005892 |
| 14 | 6 | 0 | -2.199498 | -0.283390 | -0.112781 |
| 15 | 6 | 0 | -2.370369 | 0.310696  | 1.263827  |
| 16 | 1 | 0 | -1.752082 | 1.203590  | 1.379067  |
| 17 | 1 | 0 | -3.413427 | 0.592312  | 1.412574  |
| 18 | 1 | 0 | -2.097464 | -0.410948 | 2.041430  |
| 19 | 8 | 0 | -0.969426 | -0.801366 | -0.438460 |
| 20 | 1 | 0 | -3.979210 | -0.071631 | -0.660016 |

---

**TS3'**

---

| Center<br>Number | Atomic<br>Number | Atomic<br>Type | Coordinates (in Å) |           |           |
|------------------|------------------|----------------|--------------------|-----------|-----------|
|                  |                  |                | X                  | Y         | Z         |
| 1                | 6                | 0              | -1.904061          | 0.581286  | -0.729108 |
| 2                | 6                | 0              | -1.687860          | -0.685005 | -0.011497 |
| 3                | 6                | 0              | -0.597952          | -0.682896 | 1.022479  |
| 4                | 6                | 0              | -0.125875          | 0.528102  | 1.536461  |
| 5                | 6                | 0              | -0.224584          | 1.631668  | 0.708533  |
| 6                | 6                | 0              | -1.185782          | 1.667899  | -0.393497 |
| 7                | 1                | 0              | -2.650582          | 0.586964  | -1.515140 |
| 8                | 1                | 0              | -0.486582          | -1.612955 | 1.566793  |
| 9                | 1                | 0              | 0.540135           | 0.540397  | 2.392420  |
| 10               | 1                | 0              | 0.249846           | 2.565695  | 0.989428  |
| 11               | 1                | 0              | -1.304317          | 2.604051  | -0.928699 |
| 12               | 8                | 0              | -2.350692          | -1.692882 | -0.219560 |
| 13               | 7                | 0              | 1.438733           | 0.994645  | -0.810789 |
| 14               | 6                | 0              | 1.676843           | -0.252366 | -0.470432 |
| 15               | 6                | 0              | 3.029547           | -0.740535 | 0.004905  |
| 16               | 1                | 0              | 3.214166           | -1.752922 | -0.361937 |
| 17               | 1                | 0              | 3.844450           | -0.084558 | -0.312673 |
| 18               | 1                | 0              | 3.021576           | -0.782990 | 1.101784  |
| 19               | 8                | 0              | 0.715883           | -1.118810 | -0.427091 |
| 20               | 1                | 0              | 2.281491           | 1.558531  | -0.676773 |

---
